# Supplementary material for: Kinetics of blood cell differentiation during hematopoiesis revealed by quantitative long-term live imaging
Source: eLife. 2023 Mar 31;12:e84085. doi: 10.7554/eLife.84085 (PMC10065797; doi:10.7554/eLife.84085)
Supplement: Figure 1—figure supplement 2—source data 1. [file elife-84085-fig1-figsupp2-data1.xlsx]

## Sheet: Figure 1 figure supplement 2A-B
	SM+fat bodies				SM+no fat bodies
	Time (hr)	GstD-GFP			Time (hr)	GstD-GFP
	0	0.028641			0	0.022
	4	0.028124			4	0.023
	8	0.032344			8	0.033
	12	0.039587			12	0.057

## Sheet: Figure 1 figure supplement 2C
	in vivo				ex vivo (+fat bodies)						Table Analyzed	ex vivo vs in vivo for ANOVA
	0hr	3hr	6hr	12hr	0hr	3hr	6hr	12hr
	0.038543	0.014714	0.031227	0.021489	0.0494	0.0161	0.0112	0.013			Two-way ANOVA	Ordinary
	0.032985	0.008813	0.022353	0.024121	0.0559	0.0153	0.0119	0.0154			Alpha	0.05
	0.02638	0.033641	0.038437	0.033367	0.0128	0.0141	0.0209	0.0348
	0.037199	0.021658	0.024834	0.04348	0.0155	0.0153	0.0147	0.0266			Source of Variation	% of total variation	P value	P value summary	Significant?
	0.036135	0.050371	0.027036	0.028489	0.0202	0.0181	0.025	0.0475			Interaction	4.853	0.2691	ns	No
		0.0227	0.016901	0.029335	0.0136	0.0146	0.0226	0.0427			Time (0, 3, 6, 12hr)	10.5	0.0415	*	Yes
					0.0205	0.0231	0.0285	0.0509			Tissue culture (ex vivo or in vivo)	3.708	0.0843	ns	No
					0.0286	0.0287	0.0304	0.0396
					0.0143	0.0138	0.0175	0.0306			ANOVA table	SS	DF	MS	F (DFn, DFd)	P value
					0.0081	0.0043	0.004	0.0059			Interaction	0.0005618	3	0.0001873	F (3, 67) = 1.339	P = 0.2691
					0.0212	0.0218	0.0346	0.0639			Time	0.001215	3	0.0004051	F (3, 67) = 2.896	P = 0.0415
					0.0273	0.0318	0.0164	0.0553			Tissue culture	0.0004293	1	0.0004293	F (1, 67) = 3.070	P = 0.0843
					0.0173	0.0087	0.0207	0.0259			Residual	0.009371	67	0.0001399
											Compare each cell mean with the other cell mean in that row.
											Number of families	1
											Number of comparisons per family	4
											Alpha	0.05
											Sidak's multiple comparisons test	Mean Diff.	95% CI of diff.	Significant?	Summary	Adjusted P Value
											in vivo - ex vivo
											0hr	0.0108	-0.005130 to 0.02673	No	ns	0.306
											3hr	0.0079	-0.007040 to 0.02284	No	ns	0.5489
											6hr	0.0069	-0.008040 to 0.02184	No	ns	0.6687
											12hr	-0.0048	-0.01974 to 0.01014	No	ns	0.8819
											Test details	Mean 1	Mean 2	Mean Diff.	SE of diff.	N1	N2	t	DF
											in vivo - ex vivo
											0hr	0.0342	0.0234	0.0108	0.006224	5	13	1.735	67
											3hr	0.0253	0.0174	0.0079	0.005837	6	13	1.353	67
											6hr	0.0268	0.0199	0.0069	0.005837	6	13	1.182	67
											12hr	0.03	0.0348	-0.0048	0.005837	6	13	0.8223	67

## Sheet: Figure 1 figure supplement 2E
	Time (hr)	SM+fat bodies				PBS+fat bodies
	0	1	2	5	2	2	1	4	0	6	3
	0.5	1	2	5	3	2	1	4	0	8	4
	1	2	2	6	3	2	1	4	0	8	4
	1.5	3	2	6	3	2	1	4	0	9	4
	2	3	3	6	3	2	1	6	0	9	5
	2.5	3	3	7	4	2	1	7	0	9	5
	3	3	4	7	4	2	1	7	0	9	5
	3.5	4	4	7	5	2	1	7	0	9	5
	4	4	4	7	5	2	1	7	0	10	5
	4.5	4	4	7	6	2	1	7	0	12	6
	5	5	4	7	6	2	1	8	0	13	6
	5.5	5	4	8	6	2	1	8	1	18	7
	6	5	4	8	6	2	2	8	1	25	10
	6.5	5	5	8	7	2	2	11	1	28	14
	7	5	5	9	7	2	2	13	1	32	17
	7.5	5	5	9	7	2	2	14	1	36	19
	8	5	6	9	7	2	2	16	1	44	22
	8.5	5	6	9	7	3	3	18	2	50	28
	9	5	6	9	7	5	4	22	3	52	30
	9.5	5	7	10	7	6	4	29	6	62	42
	10	6	7	11	7	8	4	35	8	70	48
	10.5	6	7	14	7	10	5	38	9	73	48
	11	6	8	14	7	11	5	45	15	86	49
	11.5	7	8	14	7	16	8	50	18	101	52
	12	8	9	16	7	16	13	64	31	106	59
	12.5	9	9	17	8	18	15	71	36	106	68
