# Supplementary material for: Kinetics of blood cell differentiation during hematopoiesis revealed by quantitative long-term live imaging
Source: eLife. 2023 Mar 31;12:e84085. doi: 10.7554/eLife.84085 (PMC10065797; doi:10.7554/eLife.84085)
Supplement: Figure 1—figure supplement 3—source data 1. [file elife-84085-fig1-figsupp3-data1.xlsx]

## Sheet: Figure 1 figure supplement 3A
			ex vivo uncompressed LG
				G1				S				G2					Table Analyzed	Ex vivo cell cycle
			ex vivo 0hr	0.464286	0.457944	0.426087	0.357143	0.330357	0.420561	0.4	0.457143	0.205357	0.121495	0.173913	0.185714
			ex vivo 3hr	0.487179	0.38835	0.438095	0.322581	0.324786	0.427184	0.304762	0.5	0.188034	0.184466	0.257143	0.177419		Two-way RM ANOVA	Matching: Stacked
			ex vivo 6hr	0.460784	0.397959	0.51087	0.349206	0.343137	0.387755	0.271739	0.47619	0.196078	0.214286	0.217391	0.174603		Alpha	0.05
			ex vivo 9hr	0.494845	0.414894	0.542553	0.387755	0.298969	0.425532	0.319149	0.44898	0.206186	0.159574	0.138298	0.163265
			ex vivo 12hr	0.438095	0.427083	0.554217	0.344828	0.342857	0.34375	0.325301	0.517241	0.219048	0.229167	0.120482	0.137931		Source of Variation	% of total variation	P value	P value summary	Significant?
																	Interaction	1.411	0.3447	ns	No
																	Time	3.036e-11	> 0.9999	ns	No
																	cell cycle stage	77.3	0.0003	***	Yes
																	Subjects (matching)	15.85	< 0.0001	****	Yes
																	ANOVA table	SS	DF	MS	F (DFn, DFd)	P value
																	Interaction	0.01275	8	0.001594	F (8, 36) = 1.168	P = 0.3447
																	Time	2.743e-13	4	6.858e-14	F (4, 36) = 5.026e-011	P > 0.9999
																	cell cycle stage	0.6985	2	0.3493	F (2, 9) = 21.94	P = 0.0003
																	Subjects (matching)	0.1433	9	0.01592	F (9, 36) = 11.67	P < 0.0001
																	Residual	0.04912	36	0.001365
																	Number of missing values	0
																	Within each column, compare rows (simple effects within columns)
																	Number of families	3
																	Number of comparisons per family	4
																	Alpha	0.05
																	Dunnett's multiple comparisons test	Mean Diff.	95% CI of diff.	Significant?	Summary	Adjusted P Value
																	G1
																	0hr vs. 3hr	0.01731	-0.04942 to 0.08404	No	ns	0.9083
																	0hr vs. 6hr	-0.00334	-0.07007 to 0.06339	No	ns	0.9998
																	0hr vs. 9hr	-0.03365	-0.1004 to 0.03308	No	ns	0.5148
																	0hr vs. 12hr	-0.01469	-0.08142 to 0.05204	No	ns	0.9462
																	S
																	0hr vs. 3hr	0.01283	-0.05390 to 0.07956	No	ns	0.9661
																	0hr vs. 6hr	0.03231	-0.03442 to 0.09904	No	ns	0.5493
																	0hr vs. 9hr	0.02886	-0.03787 to 0.09559	No	ns	0.6408
																	0hr vs. 12hr	0.01973	-0.04700 to 0.08646	No	ns	0.8639
																	G2
																	0hr vs. 3hr	-0.03015	-0.09688 to 0.03658	No	ns	0.6064
																	0hr vs. 6hr	-0.02897	-0.09570 to 0.03776	No	ns	0.6378
																	0hr vs. 9hr	0.004789	-0.06194 to 0.07152	No	ns	0.999
																	0hr vs. 12hr	-0.005037	-0.07177 to 0.06169	No	ns	0.9989
																	Test details	Mean 1	Mean 2	Mean Diff.	SE of diff.	N1	N2	q	DF
																	G1
																	0hr vs. 3hr	0.4264	0.4091	0.01731	0.02612	4	4	0.6628	36
																	0hr vs. 6hr	0.4264	0.4297	-0.00334	0.02612	4	4	0.1279	36
																	0hr vs. 9hr	0.4264	0.46	-0.03365	0.02612	4	4	1.288	36
																	0hr vs. 12hr	0.4264	0.4411	-0.01469	0.02612	4	4	0.5624	36
																	S
																	0hr vs. 3hr	0.402	0.3892	0.01283	0.02612	4	4	0.4913	36
																	0hr vs. 6hr	0.402	0.3697	0.03231	0.02612	4	4	1.237	36
																	0hr vs. 9hr	0.402	0.3732	0.02886	0.02612	4	4	1.105	36
																	0hr vs. 12hr	0.402	0.3823	0.01973	0.02612	4	4	0.7553	36
																	G2
																	0hr vs. 3hr	0.1716	0.2018	-0.03015	0.02612	4	4	1.154	36
																	0hr vs. 6hr	0.1716	0.2006	-0.02897	0.02612	4	4	1.109	36
																	0hr vs. 9hr	0.1716	0.1668	0.004789	0.02612	4	4	0.1833	36
																	0hr vs. 12hr	0.1716	0.1767	-0.005037	0.02612	4	4	0.1928	36

## Sheet: Figure 1 figure supplement 3B
			ex vivo compressed LG
				G1				S				G2
			ex vivo 0hr	0.373	0.364	0.196	0.233	0.455	0.477	0.522	0.547	0.173	0.159	0.283	0.22
			ex vivo 3hr	0.517	0.468	0.209	0.22	0.195	0.319	0.246	0.364	0.287	0.213	0.545	0.416
			ex vivo 6hr	0.788	0.706	0.533	0.508	0.071	0.118	0.136	0.158	0.141	0.176	0.332	0.333
			ex vivo 9hr	0.86	0.714	0.724	0.785	0.047	0.167	0.105	0.108	0.093	0.119	0.171	0.108
			ex vivo 12hr	0.845	0.689	0.834	0.832	0.056	0.2	0.067	0.078	0.099	0.111	0.098	0.09

## Sheet: Figure 1 figure supplement 3C
					G1				S				G2
				ex vivo 0hr	0.464286	0.457944	0.426087	0.357143	0.330357	0.420561	0.4	0.457143	0.205357	0.121495	0.173913	0.185714
				in vivo 0hr	0.464286	0.354839	0.326667	0.371429	0.4	0.413978	0.373333	0.364286	0.135714	0.231183	0.3	0.264286
				ex vivo 3hr	0.487179	0.38835	0.438095	0.322581	0.324786	0.427184	0.304762	0.5	0.188034	0.184466	0.257143	0.177419
				in vivo 3hr	0.308824	0.270492	0.335664	0.294964	0.404412	0.491803	0.391608	0.467626	0.286765	0.237705	0.272727	0.23741
				ex vivo 6hr	0.460784	0.397959	0.51087	0.349206	0.343137	0.387755	0.271739	0.47619	0.196078	0.214286	0.217391	0.174603
				in vivo 6hr	0.363128	0.26087	0.396825	0.369048	0.402235	0.453416	0.391534	0.464286	0.234637	0.285714	0.21164	0.166667
				ex vivo 9hr	0.494845	0.414894	0.542553	0.387755	0.298969	0.425532	0.319149	0.44898	0.206186	0.159574	0.138298	0.163265
				in vivo 9hr	0.459459	0.48954	0.401316	0.397059	0.383784	0.34728	0.460526	0.433824	0.156757	0.16318	0.138158	0.169118
				ex vivo 12hr	0.438095	0.427083	0.554217	0.344828	0.342857	0.34375	0.325301	0.517241	0.219048	0.229167	0.120482	0.137931
				in vivo 12hr	0.189873	0.192308	0.325926	0.348485	0.455696	0.461538	0.503704	0.507576	0.35443	0.346154	0.17037	0.143939

## Sheet: Figure 1 figure supplement 3D-E
		ex vivo						in vivo								Statistial analysis for Figure 1 - figure supplement 3D										Statistial analysis for Figure 1 - figure supplement 3E
		0hr	3hr	6hr	9hr	12hr		0hr	3hr	6hr	9hr	12hr				Two-way ANOVA	Ordinary									Two-way ANOVA	Ordinary
		58	83	89	78	35		97	39	74	58	24				Alpha	0.05									Alpha	0.05
		79	35	26	59	43		54	71	24	59	28
		50	38	38	72	31		42	135	103	32	114				Source of Variation	% of total variation	P value	P value summary	Significant?						Source of Variation	% of total variation	P value	P value summary	Significant?
		83	90	68	55	25		47	24	44	23	83				Interaction	0.5112	0.9568	ns	No						Interaction	0.5112	0.9568	ns	No
		64	29	111	54	78		175	119	69	38	37				Time	0.518	0.9558	ns	No						Time	0.518	0.9558	ns	No
		92	313	74	45	35		71	160	162	80	118				tissue culture	0.8151	0.3102	ns	No						Tissue culture	0.8151	0.3102	ns	No
		114	192	135	34	223		143	59	79	153	153
		90	58	113	109	123		141	76	40	224	97				ANOVA table	SS	DF	MS	F (DFn, DFd)	P value					ANOVA table	SS	DF	MS	F (DFn, DFd)	P value
		92	98	115	63	196		183	95	234	174	109				Interaction	2643	4	660.8	F (4, 125) = 0.1628	P = 0.9568					Interaction	2643	4	660.8	F (4, 125) = 0.1628	P = 0.9568
		67	69	158	96	152		292	154	26	117	93				Time	2678	4	669.5	F (4, 125) = 0.1649	P = 0.9558					Time	2678	4	669.5	F (4, 125) = 0.1649	P = 0.9558
		73	107	66	106	97		81	178	70	140	151				tissue culture	4215	1	4215	F (1, 125) = 1.038	P = 0.3102					Tissue culture	4215	1	4215	F (1, 125) = 1.038	P = 0.3102
		161	87	89	77	99		120	55	128	162	152				Residual	507519	125	4060							Residual	507519	125	4060
		257	38	169	38	77				94	93	200
				179	244					43	208					Number of missing values	25									Number of missing values	25
					239					198
										258						Compare each cell mean with the other cell mean in that row.
																										Number of families	2
																Number of families	1									Number of comparisons per family	4
																Number of comparisons per family	5									Alpha	0.05
																Alpha	0.05
																										Sidak's multiple comparisons test	Mean Diff.	95% CI of diff.	Significant?	Summary	Adjusted P Value
																Sidak's multiple comparisons test	Mean Diff.	95% CI of diff.	Significant?	Summary	Adjusted P Value
																										Ex vivo
																Ex vivo - In vivo										0hr vs. 3hr	3.308	-59.86 to 66.47	No	ns	0.9999
																0hr	-22.04	-88.57 to 44.50	No	ns	0.915					0hr vs. 6hr	-3.681	-65.71 to 58.35	No	ns	0.9998
																3hr	-1.929	-68.46 to 64.61	No	ns	> 0.9999					0hr vs. 9hr	7.195	-53.83 to 68.22	No	ns	0.997
																6hr	-0.7321	-61.56 to 60.09	No	ns	> 0.9999					0hr vs. 12hr	5.077	-58.09 to 68.24	No	ns	0.9993
																9hr	-20.23	-82.00 to 41.53	No	ns	0.9186
																12hr	-11.15	-76.34 to 54.04	No	ns	0.9952					In vivo
																										0hr vs. 3hr	23.42	-42.33 to 89.16	No	ns	0.8422
																										0hr vs. 6hr	17.63	-43.87 to 79.12	No	ns	0.9212
																Test details	Mean 1	Mean 2	Mean Diff.	SE of diff.	N1	N2	t	DF		0hr vs. 9hr	9	-54.35 to 72.35	No	ns	0.9939
																										0hr vs. 12hr	15.96	-48.51 to 80.43	No	ns	0.9523
																Ex vivo - In vivo
																0hr	98.46	120.5	-22.04	25.51	13	12	0.864	125
																3hr	95.15	97.08	-1.929	25.51	13	12	0.07564	125		Test details	Mean 1	Mean 2	Mean Diff.	SE of diff.	N1	N2	t	DF
																6hr	102.1	102.9	-0.7321	23.32	14	16	0.0314	125
																9hr	91.27	111.5	-20.23	23.68	15	14	0.8545	125		Ex vivo
																12hr	93.38	104.5	-11.15	24.99	13	13	0.4463	125		0hr vs. 3hr	98.46	95.15	3.308	24.99	13	13	0.1323	125
																										0hr vs. 6hr	98.46	102.1	-3.681	24.54	13	14	0.15	125
																										0hr vs. 9hr	98.46	91.27	7.195	24.15	13	15	0.298	125
																										0hr vs. 12hr	98.46	93.38	5.077	24.99	13	13	0.2031	125
																										In vivo
																										0hr vs. 3hr	120.5	97.08	23.42	26.01	12	12	0.9002	125
																										0hr vs. 6hr	120.5	102.9	17.63	24.33	12	16	0.7243	125
																										0hr vs. 9hr	120.5	111.5	9	25.07	12	14	0.359	125
																										0hr vs. 12hr	120.5	104.5	15.96	25.51	12	13	0.6257	125

## Sheet: Figure 1 figure supplement 3F
		% relative to start point	Mitosis duration (s)
		21.8505	3480
		27.4433	2550
		29.1868	3705
		31.6322	3585
		31.6322	4860
		8.27857	2715
		12.9841	4125
		12.3398	4020
		14.5656	3915
		19.5445	2910
		12.7302	4425
		22.5513	3525
		16.4009	4215
		36.0789	4305
		43.7541	5400
		38.9922	5850
		39.1602	5400
		31.9892	4380
		27.2654	4230
		28.9597	4065
		32.9218	3810
		34.7465	4305
		50.6991	7395
		60.2915	8130
		34.6161	3405
		37.718	4065
		42.3318	4110
		53.8531	6420
		75.2132	3420
		36.9272	3360
		20.0097	2655
		30.7576	3225
		40.6298	10725
		28.7523	2840
		29.9902	2030
		28.5779	2030
		41.6376	2120
		45.5085	2330
		30.0112	1810
		34.0626	3390
		40.2078	2830
		42.1314	3730
		46.1658	1700
		35.4074	3840
		15.2184	1130
		27.5258	1920
		17.2951	2200
		22.8446	1850
		23.5936	2300
		27.9514	2380
		27.9514	2380
		28.2578	2120
		25.2448	2300
		26.7598	2820
		20.138	2210
		18.9464	2290
		34.4201	2380
		19.2357	3360
		34.7095	2560
		20.138	3360
		18.3335	1860
		27.7982	2120
		30.658	1410

## Sheet: Figure 1 figure supplement 3G
		ex vivo 0hr	ex vivo 3hr	ex vivo 6hr	ex vivo 12hr	in vivo 0hr	in vivo 3hr	in vivo 6hr	in vivo 12hr			Two-way ANOVA	Ordinary
		0.489796	0.509804	0.519231	0.490196	0.735135	0.528336	0.792098	0.315961			Alpha	0.05
		0.412844	0.450549	0.480519	0.4	0.740101	0.522589	0.788826	0.38065
		0.45946	0.494253	0.507042	0.666667	0.720677	0.893506	0.376676	0.490783			Source of Variation	% of total variation	P value	P value summary	Significant?
		0.480519	0.901408	0.754717	0.442623	0.689655	0.244444	0.153957	0.552836			Interaction	3.408	0.5182	ns	No
		0.298969	0.346939	0.397849	0.340425	0.451844	0.493282	0.449234	0.728245			Time	0.8938	0.8957	ns	No
		0.376344	0.280374	0.294643	0.327103	0.586426	0.495337	0.423285	0.520671			Tissue culture	2.09	0.2401	ns	No
						0.42815	0.29174	0.73399	0.498033
						0.205189	0.42377	0.46671	0.421625			ANOVA table	SS	DF	MS	F (DFn, DFd)	P value
							0.40372	0.427896	0.278329			Interaction	0.07366	3	0.02455	F (3, 63) = 0.7644	P = 0.5182
							0.307416	0.391555	0.477306			Time	0.01932	3	0.00644	F (3, 63) = 0.2005	P = 0.8957
							0.108761	0.728395	0.616261			Tissue culture	0.04517	1	0.04517	F (1, 63) = 1.406	P = 0.2401
							0.243902	0.773279	0.682493			Residual	2.023	63	0.03212
							0.795739		0.585202
							0.591779
												Number of families	1
												Number of comparisons per family	4
												Alpha	0.05
												Sidak's multiple comparisons test	Mean Diff.	95% CI of diff.	Significant?	Summary	Adjusted P Value
												ex vivo - in vivo
												0	-0.1499	-0.3981 to 0.09828	No	ns	0.4177
												3	0.044	-0.1802 to 0.2682	No	ns	0.9784
												6	-0.0499	-0.2797 to 0.1799	No	ns	0.9688
												12	-0.0592	-0.2860 to 0.1676	No	ns	0.9403
												Test details	Mean 1	Mean 2	Mean Diff.	SE of diff.	N1	N2	t	DF
												ex vivo - in vivo
												0	0.4197	0.5696	-0.1499	0.09679	6	8	1.549	63
												3	0.4972	0.4532	0.044	0.08745	6	14	0.5032	63
												6	0.4923	0.5422	-0.0499	0.08961	6	12	0.5569	63
												12	0.4445	0.5037	-0.0592	0.08845	6	13	0.6693	63
