# Supplementary material for: Kinetics of blood cell differentiation during hematopoiesis revealed by quantitative long-term live imaging
Source: eLife. 2023 Mar 31;12:e84085. doi: 10.7554/eLife.84085 (PMC10065797; doi:10.7554/eLife.84085)
Supplement: Figure 1—source data 1. [file elife-84085-fig1-data1.xlsx]

## Sheet: Figure 1A
		Proliferation observed	No proliferation observed
	No spacer	64	36
	With spacer	80	20
		Proliferation observed	No proliferation observed
	Without fat bodies	10	90
	With fat bodies	68	32

## Sheet: Figure 1B
		Imaging duration (hrs)
		18.8
		18.4
		19.21
		21.34
		14.87
		17.31
		14.66
		15.98
		14.34
		12.76
		13.9
		15.7
		24.24
		14.44
		18.43
		12.5
		15.09
		15.93
		16.32
		17.14
		11.42
		14.4
		13.15
		13.95
		14.65

## Sheet: Figure 1E
		Time (hr)	SM with fat bodies													SM without fat bodies
		0	0.049375	0.055884	0.01276	0.015495	0.020182	0.013647	0.020481	0.028641	0.014327	0.00806	0.021241	0.027285	0.017285	0.013481	0.022268	0.026249	0.023883	0.031511	0.021797	0.040791
		0.5	0.041547	0.042512	0.01183	0.01561	0.022092	0.014902	0.020318	0.028684	0.014894	0.007332	0.019595	0.027855	0.015369	0.012656	0.021268	0.022833	0.020619	0.032184	0.023523	0.049794
		1	0.032638	0.029844	0.012217	0.019303	0.023049	0.014082	0.020517	0.029724	0.01441	0.006448	0.019917	0.025211	0.017915	0.012715	0.02139	0.021482	0.018099	0.031765	0.023841	0.050604
		1.5	0.024029	0.020602	0.013506	0.018197	0.020767	0.013152	0.021037	0.02936	0.015997	0.005957	0.019932	0.028415	0.010689	0.013708	0.021991	0.018712	0.014844	0.033376	0.022635	0.071864
		2	0.021668	0.018152	0.012773	0.017075	0.017541	0.013148	0.021379	0.028843	0.015798	0.005719	0.019665	0.027593	0.010108	0.01323	0.022085	0.015867	0.01207	0.034597	0.022512	0.075339
		2.5	0.016918	0.016539	0.012985	0.015872	0.018119	0.01396	0.022527	0.028899	0.014876	0.004858	0.019304	0.029259	0.011177	0.012888	0.022368	0.014359	0.01159	0.035925	0.022493	0.072912
		3	0.01611	0.01534	0.014054	0.015295	0.018092	0.01462	0.023068	0.028673	0.013774	0.004273	0.02175	0.031836	0.008674	0.012753	0.022094	0.013013	0.010535	0.038531	0.022735	0.074671
		3.5	0.015585	0.014224	0.013377	0.01325	0.020377	0.017012	0.022956	0.029332	0.013152	0.003752	0.023987	0.030367	0.006511	0.013286	0.022441	0.012995	0.009187	0.04032	0.02332	0.07846
		4	0.014762	0.014775	0.014916	0.01498	0.021779	0.018057	0.023458	0.028124	0.014082	0.003614	0.027018	0.02585	0.014211	0.013532	0.022925	0.013731	0.009707	0.042083	0.023928	0.091685
		4.5	0.013427	0.012353	0.016534	0.015976	0.023879	0.019873	0.024786	0.029397	0.01564	0.003596	0.028938	0.024611	0.005881	0.013849	0.023763	0.014465	0.010081	0.046243	0.024724	0.093882
		5	0.012429	0.013123	0.017469	0.016469	0.025328	0.020872	0.024909	0.030741	0.016862	0.003866	0.031917	0.015388	0.010093	0.014242	0.023053	0.014757	0.010321	0.052327	0.025553	0.100101
		5.5	0.010615	0.012639	0.01921	0.018287	0.024018	0.020632	0.026728	0.028726	0.013955	0.003841	0.033695	0.01434	0.014045	0.014796	0.023421	0.015359	0.010731	0.05699	0.026869	0.106249
		6	0.011236	0.011943	0.020934	0.014652	0.02504	0.022641	0.028521	0.030375	0.017512	0.00404	0.03463	0.016419	0.020701	0.015596	0.023496	0.015803	0.011127	0.062375	0.028087	0.115552
		6.5	0.010471	0.011282	0.022097	0.019099	0.025895	0.02329	0.030388	0.030037	0.016	0.004206	0.039418	0.017995	0.021189	0.016486	0.023353	0.016555	0.011155	0.066759	0.029904	0.122229
		7	0.010226	0.01116	0.024216	0.016316	0.028042	0.024358	0.031573	0.0315	0.017503	0.004427	0.034349	0.023929	0.027461	0.017971	0.023415	0.017338	0.012164	0.06754	0.031329	0.130531
		7.5	0.010497	0.010885	0.02443	0.018027	0.02704	0.025097	0.032401	0.032294	0.02099	0.004519	0.038279	0.01926	0.009377	0.018954	0.023708	0.018389	0.01306	0.07061	0.032364	0.139361
		8	0.009789	0.011633	0.022537	0.018751	0.02895	0.026969	0.035232	0.032344	0.020325	0.00512	0.040755	0.029769	0.012984	0.020522	0.024151	0.018666	0.013806	0.075029	0.033383	0.14839
		8.5	0.009583	0.011384	0.024116	0.02051	0.030563	0.029372	0.034929	0.032658	0.020734	0.00521	0.040857	0.024972	0.008109	0.023575	0.028545	0.019764	0.014941	0.083261	0.034694	0.156489
		9	0.00987	0.012281	0.025799	0.021024	0.033788	0.028881	0.037315	0.031544	0.023532	0.004894	0.043105	0.036222	0.009585	0.025591	0.027959	0.020653	0.015982	0.088433	0.037154	0.167999
		9.5	0.010004	0.01272	0.027136	0.02416	0.037488	0.030418	0.041013	0.033834	0.02441	0.005237	0.046302	0.03446	0.013634	0.030488	0.027385	0.021415	0.01685	0.09199	0.039224	0.174803
		10	0.011153	0.014336	0.027029	0.02349	0.035842	0.033708	0.042163	0.035047	0.026108	0.005051	0.049677	0.047789	0.023267	0.032187	0.027651	0.022408	0.017786	0.100311	0.043624	0.163677
		10.5	0.009925	0.012386	0.032169	0.025086	0.039196	0.035441	0.044424	0.03702	0.027714	0.005089	0.051327	0.0429	0.017785	0.035783	0.029121	0.023493	0.018687	0.105338	0.044716	0.167128
		11	0.010693	0.013497	0.030389	0.026146	0.041217	0.038075	0.046273	0.03853	0.02842	0.005197	0.055391	0.041732	0.027039	0.041141	0.031452	0.024319	0.019486	0.102919	0.051144	0.181594
		11.5	0.010972	0.013901	0.029912	0.02725	0.045617	0.038657	0.049035	0.041172	0.029739	0.005607	0.058616	0.048228	0.016912	0.043561	0.036266	0.025396	0.020666	0.109783	0.053861	0.194002
		12	0.012972	0.015395	0.03475	0.026631	0.047484	0.042713	0.050855	0.039587	0.030588	0.005941	0.063928	0.055344	0.025913	0.047396	0.042025	0.026821	0.022508	0.118476	0.057833	0.208097
		12.5	0.014075	0.016806	0.040147	0.028281	0.051177	0.042915	0.053738	0.041977	0.033456	0.00595	0.066422	0.057528	0.039114	0.050108	0.045874	0.027582	0.023381	0.121706	0.059902	0.216798
		13	0.017259	0.018202	0.036737	0.029063	0.048559	0.044535	0.056202	0.04473	0.034882	0.006305	0.071182	0.063412	0.036379	0.05493	0.049244	0.028893	0.023985	0.125103	0.062573	0.228566

## Sheet: Figure 1F
			Cumulative cell death (%)
		Time (hr)	Mean	SD
		0	0	0
		0.5	0	0
		1	0	0
		1.5	0	0
		2	0.312279	0.449076
		2.5	0.312279	0.449076
		3	0.312279	0.449076
		3.5	0.312279	0.449076
		4	0.413905	0.397935
		4.5	0.607137	0.601057
		5	0.708763	0.590093
		5.5	0.708763	0.590093
		6	0.708763	0.590093
		6.5	0.708763	0.590093
		7	0.708763	0.590093
		7.5	0.787877	0.472988
		8	0.787877	0.472988
		8.5	0.787877	0.472988
		9	0.787877	0.472988
		9.5	0.866991	0.38639
		10	0.946105	0.353482
		10.5	0.946105	0.353482
		11	0.946105	0.353482
		11.5	0.946105	0.353482
		12	0.946105	0.353482
		12.5	0.946105	0.353482

## Sheet: Figure 1I
			Fly-FUCCI
			GFP	RFP
			12.163	24.436
			12.564	25.845
			12.453	24.55
			12.751	26.398
			11.676	23.418
			11.779	24.407
			12.135	24.86
			12.84	25.576
			12.794	26.215
			12.146	25.734
			12.782	24.014
			12.1	23.049
			11.905	25.725
			11.868	23.948
			12.249	24.894
			11.696	25.198
			12.189	25.049
			12.401	23.582
			11.258	22.877
			11.057	23.968
			10.464	22.427
			11.381	22.181
			10.797	20.779
			10.756	22.415
			11.089	21.983
			11.791	23.628
			10.994	22.456
			12.135	22.567
			11.45	23.539
			12.109	25.862
			11.51	26.003
			11.424	24.112
			11.501	24.562
			11.607	23.35
			12.083	24.381
			12.51	26.599
			12.613	27.347
			11.819	25.175
			12.894	25.966
			12.284	26.679
			13.109	26.496
			12.335	25.181
			13.074	27.974
			13.957	27.997
			12.496	26.831
			12.092	26.802
			12.095	26.777
			13.436	24.862
			12.619	26.653
			12.908	25.049
			12.716	23.633
			12.017	23.461
			12.352	25.619
			13.052	27.223
			13.476	26.785
			13.1	25.198
			12.45	27.287
			12.991	24.55
			12.868	23.857
			13	26.238
			13.026	25.029
			12.857	25.264
			12.628	26.986
			13.209	25.115
			12.794	25.418
			11.874	24.665
			12.143	23.625
			13.321	23.894
			13.112	25.08
			13.785	27.496
			12.479	25.625
			12.605	25.771
			12.298	24.636
			13.069	25.771
			12.152	23.467
			12.544	24.063
			12.716	24.023
			12.691	25.788
			12.289	27.12
			13.278	24.656
			12.759	27.86
			12.479	27.705
			13.089	25.407
			13.484	26.487
			12.659	25.347
			13.275	26.55
			12.63	27.347
			13.771	27.143
			12.183	26.731
			11.722	25.35
			13.51	24.49
			13.077	24.364
			12.378	26.338
			13.304	26.16
			12.636	27.123
			12.625	26.544
			12.464	25.229
			12.943	25.748
			12.739	26.513
			12.401	25.335
			12.874	25.705
			13.092	26.596
			12.722	25.006
			12.771	24.023
			13.65	26.943
			13.871	26.857
			12.447	26.547
			13.765	26.966
			13.017	26.467
			12.527	25.255
			13.344	26.774
			13.181	26.742
			12.467	24.946
			13.112	26.33
			13.516	26.917
			12.665	25.788
			13.266	26.006
			13.289	26.946
			13.361	27.367
			12.719	27.676
			13.135	25.713
			12.438	25.788
			12.444	24.029
			12.65	26.074
			12.837	24.413
			11.046	22.883
			11.132	23.476
			12.358	25.143
			11.888	24.994
			11.968	26.292
			12.226	24.822
			12.172	26.278
			10.415	22.946
			12.129	23.994
			10.84	23.496
			10.977	22.705
			11.57	25.181
			11.106	23.499
			11.278	22.659
			11.312	24.049
			12.304	23.914
			11.14	21.834
			11.547	23.066
			11.289	25.16
			11.017	22.281
			11.656	21.894
			10.559	23.524
			10.289	22.152
			11.166	23.287
			11.63	22.347
			11.246	24.189
			11.169	23.249
			10.943	22.238
			11.487	22.401
			11.312	23.223
			10.33	22.622
			11.264	22.679
			11.481	21.914
			11.513	23.662
			11.699	25.129
			11.582	23.421
			11.785	24.014
			11.006	22.728
			11.696	23.241
			11.195	24.017
			10.928	22.212
			11.662	22.387
			11.61	21.742
			12.404	25.355
			11.433	23.556
			11.926	23.582
			11.65	22.246
			11.358	23.083
			12.183	23.192
			12.009	24.599
			11.903	20.814
			10.719	20.421
			11.183	21.842
			10.831	21.361
			11.842	21.264
			10.865	23.117
			11.51	20.834
			10.911	19.845
			11.074	19.226
			11.106	21
			11.564	21.307
			12.011	21.295
			11.226	20.659
			9.994	21.117
			10.516	18.315
			9.117	18.089
			10.734	19.842
			9.774	19.92
			10.235	20.447
			10.361	20.923
			10.868	20.281
			10.828	22.648
			11.006	22.613
			12.158	22.464
			10.891	21.496
			11.032	19.077
			12.226	22.206
			12.309	22.476
			12.046	21.699
			12.301	22.696
			11.673	22.135
			11.868	20.467
			11.682	20.158
			11.828	20.84
			12.252	22.387
			11.794	21.556
			11.883	21.052
			12.097	21.275
			12.1	20.897
			11.92	20.45
			11.748	23.223
			12.264	22.481
			11.564	22.037
			11.103	20.496
			9.011	18.06
			10.378	17.84
			10.41	18.774
			10.123	19.656
			9.771	19.88
			10.344	20.352
			10.948	20.479
			11.456	18.587
			11.458	20.57
			10.802	18.215
			10.009	18.716
			10.794	18.61
			10.991	17.39
			9.914	19.034
			10.418	19.215
			11.622	20.41
			11.198	21.206
			10.53	19.573
			10.266	16.951
			9.307	17.264
			9.986	16.745
			10.37	18.53
			9.771	16.96
			10.668	18.183
			10.593	18.178
			11.805	20.181
			11.298	21.35
			11.516	19.84
			11.84	21.854
			11.928	21.112
			12.352	21.129
			12.834	23.404
			12.02	20.636
			12.235	20.192
			12.249	21.693
			11.966	21.888
			11.831	22.378
			12.805	23.158
			13.513	22.673
			12.765	22.799
			13.052	22.607
			13.923	23.04
			14.387	25.691
			13.501	23.407
			14.043	23.215
			13.573	22.693
			12.779	23.16
			13.877	22.014
			13.169	23.613
			12.86	23.768
			13.745	23.372
			12.774	22.309
			14.504	24.507
			13.559	22.504
			13.198	23.556
			13.456	23.198
			13.779	23.052
			13.126	22.57
			13.513	23.364
			13.195	23.994
			13.616	24.619
			13.808	23.461
			14.023	23.074
			13.341	22.338
			12.582	23.092
			13.484	23.84
			12.842	23.244
			13.413	23.364
			13.547	22.625
			13.845	22.436
			13.324	22.559
			13.673	22.347
			13.754	22.943
			13.891	23.59
			13.444	21.994
			14.453	23.327
			13.937	21.963
			14.567	23.834
			14.834	24.599
			14.98	23.596
			13.828	23.682
			14.166	25.519
			14.765	24.986
			14.765	24.338
			14.57	25.788
			15.066	26.645
			15.252	24.355
			14.926	23.556
			14.562	24.49
			14.341	24.831
			15.33	24.355
			14.685	25.063
			14.095	23.115
			14.797	23.249
			14.238	23.573
			13.903	23
			13.436	22.831
			13.989	22.768
			14.16	21.88
			14.59	23.968
			13.946	23.33
			14.04	21.527
			14.327	22.997
			14.424	21.559
			13.524	22.53
			13.848	21.966
			13.212	20.837
			13.461	21.321
			13.418	21.877
			12.458	20.582
			12.633	20.378
			12.585	19.341
			13.479	18.61
			12.977	19.613
			12.289	19.447
			11.493	17.37
			11.507	18.215
			11.986	18.006
			12.441	17.971
			12.986	19.519
			12.183	17.206
			12.086	18.189
			11.441	16.61
			10.639	16.138
			10.404	15.722
			11.977	15.765
			12.473	17.229
			10.797	15.679
			10.413	14.327
			10.499	13.668
			10.745	14.143
			10.593	15.527
			10.903	14.989
			10.777	16.65
			9.94	15.458
			11.043	15.427
			11.748	16.433
			11.682	17.138
			11.458	16.719
			10.149	14.903
			10.034	12.934
			9.911	14.298
			9.708	14.691
			9.963	14.894
			10.848	15.808
			11.074	16.748
			10.777	14.613
			9.61	15.189
			10.665	14.146
			10.966	14.814
			11.04	16.006
			12.037	17.777
			12.788	18.215
			11.441	14.249
			11.223	15.155
			10.559	14.84
			10.384	16.573
			11.178	16.166
			11.384	15.65
			11.444	15.418
			9.914	13.16
			8.779	13.04
			8.831	12.384
			9.029	11.676
			11.08	14.851
			10.501	13.092
			9.762	14.547
			9.762	14.175
			10.361	13.266
			10.616	14.619
			9.968	14.799
			10.49	14.67
			10.496	14.307
			10.596	16.029
			10.421	13.868
			10.138	13.476
			10.794	14.298
			11.57	13.926
			11.779	16.493
			10.553	14.84
			12.115	14.957
			11.516	14.203
			11.891	14.441
			10.851	15.172
			11.152	15.662
			11.407	15.35
			9.673	12.877
			9.212	13.169
			9.722	13.02
			10.1	14.845
			10.897	15.218
			12.653	15.327
			11.685	14.828
			11.954	15.762
			11.232	15.931
			11.731	15.665
			11.129	15.464
			12.736	17.559
			12.785	16.596
			12.367	15.576
			12.754	16.731
			12.295	16.559
			13.341	16.814
			12.968	17.092
			11.607	15.788
			12.006	15.444
			13.052	16.189
			13.178	16.112
			13.519	18.86
			12.436	17.186
			13.49	19.057
			13.679	17.59
			14.55	17.811
			14.756	19.195
			14.665	18.811
			15.358	18.682
			14.404	19.126
			14.387	17.762
			13.59	16.862
			15.84	19.372
			15.017	19.284
			15.848	20.109
			14.301	20.069
			14.106	16.261
			14.791	17.61
			14.361	18.026
			15.109	18.954
			15.524	17.756
			16.083	19.736
			15.713	20.109
			16.201	19.593
			17.599	21.931
			16.891	20.88
			16.504	20.527
			16.35	20.473
			16.355	19.527
			16.473	19.59
			15.301	20.054
			15.244	20.06
			16.479	21.146
			16.84	19.37
			16.762	19.467
			17.318	18.095
			18.052	22.994
			19.47	21.98
			18.828	22.536
			18.089	21.292
			17.542	20.458
			17.246	20.364
			17.444	20.728
			18.066	20.905
			18.845	20.04
			17.172	19.063
			16.713	18.235
			15.461	18.648
			14.782	17.736
			15.258	15.822
			14.874	18.825
			16.321	18.61
			14.825	16.957
			16.344	19.819
			15.92	19.335
			15.716	19.252
			17.318	18.808
			17.261	19.739
			17.206	19.539
			18.834	19.484
			18.705	20.977
			18.318	19.794
			16.991	17.613
			16.032	17.53
			16.057	17.516
			14.983	17.092
			16.02	17.923
			15.868	16.47
			17.132	19.86
			18.476	17.713
			18.513	20.295
			17.774	18.877
			18.582	18.817
			16.934	18.648
			16.06	15.527
			15.814	16.762
			15.218	16.954
			15.47	15.496
			13.513	14.226
			12.991	14.086
			12.797	12.725
			12.052	12.974
			13.16	13.762
			13.269	14.536
			15.046	16.146
			15.954	16.613
			15.103	17.693
			15.794	15.559
			16.845	17.304
			17.117	18.12
			18.097	17.616
			17.218	16.077
			17.908	15.825
			16.095	15.407
			16.203	16.192
			16.249	17.112
			15.797	14.711
			17.536	16.338
			17.398	16.911
			16.917	14.719
			15.295	15.774
			16.98	14.602
			15.252	14.447
			15.115	13.888
			15.762	13.711
			14.407	14.659
			14.587	13.324
			13.656	13.84
			14.378	14.53
			13.748	13.84
			15.903	15.393
			16.888	14.805
			16.86	15.711
			18.181	15.298
			17.169	16.622
			16.613	14.393
			16.564	14.943
			17.84	16.628
			16.355	16.774
			17.275	16.238
			17.026	16.997
			17.794	15.221
			18.14	15.871
			19.029	17.527
			20.553	17.183
			18.693	17.768
			19.37	16.433
			18.092	16.811
			18.418	17.155
			19.011	15.845
			17.84	16.53
			17.974	16.63
			18.484	16.375
			19.567	15.487
			19.688	16.209
			20.41	17.438
			19.888	16.94
			21.585	16.556
			21.567	16.86
			19.387	15.848
			20.487	17.149
			20.989	17.221
			21.722	16.871
			22.479	16.367
			20.88	17.132
			23.086	18.507
			22.736	17.312
			22.699	17.957
			20.954	16.33
			22.57	16.266
			21.748	17.261
			21.946	16.261
			21.946	16.496
			20.662	14.65
			22.307	14.266
			22.47	16.556
			22.352	16.37
			21.782	14.799
			22.146	16.676
			23.221	16.728
			23.854	16.544
			24.447	16.682
			25.521	16.625
			25.341	15.92
			25.321	15.679
			25.822	16.977
			24.126	14.539
			25.719	15.106
			25.026	14.387
			26.533	15.527
			27.152	17.785
			27.387	15.636
			28.372	14.719
			28.032	14.693
			26.593	14.43
			27.149	13.413
			26.255	13.662
			26.533	13.049
			26.928	12.762
			25.003	13.9
			26.183	11.951
			25.994	11.212
			26.903	11.487
			28.456	11.799
			29.332	11.295
			29.046	11
			28.387	10.937
			29.407	10.716
			30.799	10.825
			32.181	9.877
			30.04	9.281
			29.593	10.146
			29.946	8.991
			30.648	8.309
			30.782	8.736
			29.39	8.069
			30.02	7.481
			30.88	6.94
			29.854	7.261
			30.61	6.378
			29.845	5.146
			32.447	5.92
			31.883	5.599
			31.625	5.493
			30.862	5.742
			31.458	4.862
			32.393	4.175
			33.625	4.08
			31.971	4.183
			32.668	4.146
			30.63	3.943
			32.739	3.931
			30.258	3.834
			30.696	3.828
			29.699	4.189
			29.926	4.215
			30.404	3.539
			29.33	3.974
			29.381	3.754
			29.516	3.496
			29.98	3.347
			31.556	3.195
			28.521	3.556
			29.476	3.822
			30.218	3.361
			32.109	3.266
			30.659	3.344
			29.831	3.35
			29.885	3.166
			30.301	3.585
			31.441	3.338
			31.011	3.358
			30.814	3.542
			31.983	3.682
			30.88	3.521
			29.619	2.788
			30.928	3.438
			31.347	3.364
			30.418	3.533
			30.324	3.057
			29.688	2.719
			32.077	3.57
			30.991	3.404
			30.235	3.281
			32.275	3.117
			31.458	3.521
			33.287	3.616
			32.436	3.155
			31.673	3.332
			32.84	3.372
			30.375	3.487
			33.149	3.115
			31.321	3.046
			31.444	3.183
			31.791	3.255
			30.937	3.138
			32.464	3.384
			33.957	3.679
			30.742	2.751
			33.845	3.014
			31.679	3.393
			31.991	3.198
			34.338	3.166
			35.92	3.461
			33.808	3.135
			33.966	3.854
			30.636	3.415
			32.441	3.046
			32.181	3.143
			34.372	3.372
			33.951	2.977
			33.347	3.441
			33.748	3.106
			31.003	3.361
			33.722	3.109
			33.716	3.178
			33.476	2.931
			33.126	3.1
			32.819	3.086
			35.756	3.249
			37.244	3.355
			35.258	2.983
			36.057	3.264
			36.533	3.458
			33.453	2.883
			34.802	3.1
			33.98	3.08
			36.203	2.814
			34.301	3.226
			34.673	3.095
			32.398	3.054
			34.421	3.229
			30.436	3.014
			30.656	3.095
			32.37	2.928
			30.33	3.149
			33.332	3.117
			33.774	2.926
			35.785	3.298
			33.903	3.192
			34.579	3.441
			33.499	3.186
			35.585	2.923
			32.908	3.427
			32.817	3.158
			34.782	3.201
			33.232	3.562
			34.883	3.335
			34.9	2.857
			35.02	2.874
			35.014	3.009
			34.393	3.298
			34.903	3.135
			33.501	3.335
			35.017	3.309
			34.825	2.948
			32.905	3.092
			33.914	3.06
			32.633	3.344
			32.682	3.444
			32.905	3.129
			33.1	3.229
			34.885	3.49
			32.736	3.407
			34	3.384
			32.934	2.825
			32.989	3.052
			33.573	3.281
			32.014	2.997
			34.759	2.805
			34.209	3.172
			33.473	3.043
			34.112	3.327
			31.08	3.135
			34.327	3.212
			33.926	3.112
			36.066	3.258
			37.745	3.095
			32.785	3.39
			37.851	3.066
			34.742	3.066
			39.685	2.877
			35.461	3.63
			35.298	3.074
			36.782	2.845
			34.249	2.787
			36.173	3.148
			35.303	3.339
			33.455	3.282
			32.278	2.675
			32.798	2.726
			33.347	2.888
			33.26	2.773
			33.13	3.181
			31.556	2.765
			30.307	3.148
			32.213	2.509
			31.451	3.036
			28.87	2.765
			31.235	2.704
			32.061	2.812
			33.321	2.978
			33.57	3.051
			34.621	2.968
			35.238	2.928
			34.451	3.134
			32.596	2.606
			35.401	2.773
			34.289	2.625
			33.722	2.863
			35.271	2.603
			34.881	3.036
			33.773	2.993
			35.123	3.213
			36.105	3.014
			38.668	2.773
			37.52	3.292
			36.56	3.097
			36.812	2.859
			37.419	2.798
			35.621	2.816
			38.292	3.224
			37.39	2.599
			37.325	3.152
			33.477	2.877
			36.314	2.91
			35.69	3.137
			34.343	2.935
			36.798	3.112
			37.209	3.112
			34.274	2.888
			34.087	3.029
			36.014	3.069
			34.827	3.054
			35.823	2.599
			36.462	2.946
			37.256	3.011
			38.004	2.505
			37.047	2.982
			37.542	2.877
			37.931	2.711
			37.505	2.632
			37.343	2.859
			36.105	2.863
			36.231	2.888
			36.567	3.412
			35.755	3.199
			34.856	3.083
			36.639	2.679
			36.314	3.032
			34.903	2.91
			36.682	3.199
			34.906	2.755
			37.007	3.126
			38.473	3
			37.22	2.877
			37.664	2.874
			36.336	3.029
			34.776	2.848
			35.141	2.798
			37.061	3.199
			37.437	3.032
			36.968	3.004
			36.509	3
			35.415	2.747
			36.379	3.072
			35.563	2.823
			34.892	3.087
			36.022	2.762
			36.285	3.032
			37.022	2.726
			35.758	3.119
			36.437	2.957
			37.17	2.675
			35.718	2.856
			37.321	3.325
			37.726	2.617
			35.83	3.296
			35.397	2.975
			35.693	2.661
			34.661	3.112
			33.704	3.123
			33.408	2.809
			34.069	2.632
			34.661	2.989
			32.545	3.09
			33.065	2.809
			36.596	3.108
			34.123	2.69
			32.841	2.83
			33.419	2.61
			35.119	2.827
			36.354	3.043
			34.982	3.065
			35.523	3.072
			37.108	2.975
			34.7	3.249
			35.87	2.834
			34.271	2.773
			32.491	2.809
			31.404	2.949
			34.209	3.184
			35.617	2.711
			35.397	3.04
			36.058	2.791
			34.657	3.227
			38.43	2.419
			40.321	3.155
			38.108	3.22
			39.025	2.643
			39.199	3
			38.632	2.989
			36.838	2.657
			37.051	3.242
			36.264	3.112
			37.52	3.014
			36.188	3.206
			36.928	3.249
			35.874	2.661
			36.711	2.614
			38.267	2.884
			39.448	3.17
			39.04	2.794
			36.906	2.729
			37.162	2.744
			35.336	2.96
			36.051	2.52
			36.549	2.675
			34.91	3.097
			33.433	3.112
			33.137	2.993
			33.534	2.895
			35.978	2.606
			32.816	2.657
			34.942	2.823
			34.697	2.798
			34.484	3.148
			36.242	2.57
			33.888	3.137
			35.105	2.888
			35.96	2.581
			34.661	2.809
			35.217	3.09
			34.542	3.159
			34.495	2.884
			34.606	2.957
			30.856	2.668
			34.072	2.957
			32.765	3.119
			30.242	2.964
			30.668	2.704
			30.061	2.502
			30.495	2.733
			28.964	2.578
			27.827	3.155
			27.339	2.505
			28.058	2.924
			26.123	2.736
			24.928	2.592
			26.653	2.473
			27.899	3.036
			27.845	2.852
			26.177	2.65
			25.776	2.419
			24.592	2.848
			25.736	2.747
			24.083	2.686
			22.711	2.91
			22.404	2.747
			20.383	2.509
			20.913	2.653
			20.484	2.805
			19.412	3.173
			18.949	2.801
			17.48	3.069
			17.798	2.744
			17.957	2.939
			18.217	2.711
			16.549	2.819
			16.606	2.823
			15.347	2.798
			14.181	2.946
			14.646	2.57
			15.011	2.726
			14.805	2.484
			14	2.606
			13.224	2.841
			13.621	2.56
			13.318	2.715
			12.314	2.621
			11.35	2.48
			11.061	2.61
			10.982	2.588
			10.588	3.13
			10.762	2.838
			10.235	2.903
			9.44	2.588
			8.704	2.744
			9.159	2.671
			8.549	3.007
			8.007	2.715
			8.126	2.682
			7.661	2.726
			7.639	2.794
			7.617	2.523
			7.029	2.592
			7.014	2.996
			5.838	2.101
			4.264	1.715
			5.011	3.296
			4.986	2.134
			5.357	2.116
			6.993	2.881
			7.354	2.657
			6.722	2.819
