# Supplementary material for: Kinetics of blood cell differentiation during hematopoiesis revealed by quantitative long-term live imaging
Source: eLife. 2023 Mar 31;12:e84085. doi: 10.7554/eLife.84085 (PMC10065797; doi:10.7554/eLife.84085)
Supplement: Figure 2—figure supplement 2—source data 1. [file elife-84085-fig2-figsupp2-data1.xlsx]

## Sheet: Figure 2 - figure supplement 2
			dome MESO GFP intensity
		Time (hrs)	Daughter 1	Daughter 2
		1
		1.10417
		1.10833
		1.1125
		1.11667
		1.12083
		1.125
		1.12917
		1.13333
		1.1375
		1.14167
		1.14583
		1.15
		1.15417
		1.15833
		1.1625
		1.16667
		1.17083
		1.175
		1.17917
		1.18333
		1.1875
		1.19167
		1.19583
		1.2
		1.20417
		1.20833
		1.2125
		1.21667
		1.22083
		1.225
		1.22917
		1.23333
		1.2375
		1.24167
		1.24583
		1.25
		1.25417
		1.25833
		1.2625
		1.26667
		1.27083
		1.275
		1.27917
		1.28333
		1.2875
		1.29167
		1.29583
		1.3
		1.30417
		1.30833
		1.3125
		1.31667
		1.32083
		1.325
		1.32917
		1.33333
		1.3375
		1.34167
		1.34583
		1.35
		1.35417
		1.35833
		1.3625
		1.36667
		1.37083
		1.375
		1.37917
		1.38333
		1.3875
		1.39167
		1.39583
		1.4
		1.40417
		1.40833
		1.4125
		1.41667
		1.42083
		1.425
		1.42917
		1.43333
		1.4375
		1.44167
		1.44583	52.6968
		1.45	49.7511
		1.45417	47.8642
		1.45833	48.9774
		1.4625	49.0453
		1.46667	50.9819
		1.47083	51.0317
		1.475	53.5701
		1.47917	53.5611
		1.48333	52.7421
		1.4875	56.1267
		1.49167	55.5068
		1.49583	55.276
		1.5	50.7964
		1.50417	49.5973
		1.50833	57.724
		1.5125	58.9412
		1.51667	59.6561
		1.52083	60.9321
		1.525	58.4253
		1.52917	59.2986
		1.53333	60.8778
		1.5375	58.8462
		1.54167	61.4118
		1.54583	59.5656
		1.55	62.6833
		1.55417	61.7738
		1.55833	62.8235
		1.5625	61.4751
		1.56667	62.9321
		1.57083	60.4932
		1.575	59.1538
		1.57917	57.8778
		1.58333	59.4208
		1.5875	63.3529
		1.59167	66.5928
		1.59583	69.0588
		1.6	68.0724
		1.60417	63.7421
		1.60833	62.0769
		1.6125	68.181
		1.61667	65.3937
		1.62083	66.6018
		1.625	69.4706
		1.62917	70.2398
		1.63333	68.0091
		1.6375	67.3348
		1.64167	67.095
		1.64583	67.3665
		1.65	66.7104
		1.65417	69.2986
		1.65833	72.0226
		1.6625	56.7195
		1.66667	52.819
		1.67083	62.0679
		1.675	63.0679
		1.67917	62.0226
		1.68333	62.7511
		1.6875	62.8054
		1.69167	65.3846
		1.69583	61.733
		1.7	60.8145
		1.70417	47.733
		1.70833	50.6109
		1.7125	51.8507
		1.71667	48.9729
		1.72083	56.3439
		1.725	59.6923
		1.72917	58.9909
		1.73333	55.9864
		1.7375	55.4615
		1.74167	55.4389
		1.74583	52.7647
		1.75	53.2534
		1.75417	52.724
		1.75833	50.3891
		1.7625	56.7783
		1.76667	53.3529
		1.77083	56.5701
		1.775	53.5882
		1.77917	55.3529
		1.78333	54.2896
		1.7875	56.3756
		1.79167	56.2036
		1.79583	60.3665
		1.8	56.2036
		1.80417	61.4027
		1.80833	61.0045
		1.8125	57.5339
		1.81667	64.552
		1.82083	66.6199
		1.825	64.3846
		1.82917	65.8869
		1.83333	63.8371
		1.8375	67.6244
		1.84167	63.362
		1.84583	60.819
		1.85	58.0226
		1.85417	62.8688
		1.85833	57.1946	72.181
		1.8625	54.2308	67.0272
		1.86667	57.8824	72.9185
		1.87083	52.9321	72.0181
		1.875	46.819	67.5973
		1.87917	48.0271	68.1448
		1.88333	48.0724	69.2217
		1.8875	51.1358	71.6199
		1.89167	53.905	76.2805
		1.89583	53.095	74.9412
		1.9	56.4163	75.5249
		1.90417	63.5249	79.7466
		1.90833	64.2081	81.0272
		1.9125	59.6606	80.3937
		1.91667	61.7647	81.8281
		1.92083	56.7647	74.5475
		1.925	63.0091	75.7783
		1.92917	60.7421	77.1719
		1.93333	60.9412	75.4344
		1.9375	60.1765	76.4525
		1.94167	63.638	76.9593
		1.94583	63.0633	80.2308
		1.95	56.6561	78.2534
		1.95417	64.7692	80.7421
		1.95833	69.1765	80.6516
		1.9625	61.1946	80.1493
		1.96667	63.086	76.2127
		1.97083	63.828	76.7421
		1.975	68.5204	79.9593
		1.97917	70.457	80.5385
		1.98333	69.3982	78.448
		1.9875	75.6697	83.2534
		1.99167	72.8235	81.4434
		1.99583	71.6561	82.4253
		2	73.3167	81.3167
		2.00417	74.0679	80.7738
		2.00833	73.3575	79.4344
		2.0125	74.8914	78.4661
		2.01667	74.9909	80.0091
		2.02083	75.2941	79.9774
		2.025	78.5113	80.3484
		2.02917	77.4977	82.8778
		2.03333	77.5837	82.2172
		2.0375	76.8507	81.9457
		2.04167	74.4706	82.9367
		2.04583	74.4253	82.1448
		2.05	69.8461	76.7059
		2.05417	68.2353	77.0045
		2.05833	72.0452	82.5113
		2.0625	76.6244	82.4027
		2.06667	78.1991	81.9774
		2.07083	76.267	80.6787
		2.075	73.5158	77.4796
		2.07917	71.0091	78.905
		2.08333	73.2036	79.9457
		2.0875	75.1719	80.1131
		2.09167	71.4932	82.0272
		2.09583	57.8416	73.0815
		2.1	65.8416	76.5928
		2.10417	71.3529	80.6968
		2.10833	73.0091	79.4796
		2.1125	68.5656	80.2489
		2.11667	64.9593	79.5701
		2.12083	64.6561	79.1629
		2.125	66.6878	79.4118
		2.12917	70.9457	84.0815
		2.13333	69.9095	87.2443
		2.1375	70.3846	85.448
		2.14167	70.4389	81.0045
		2.14583	71.9819	81.3801
		2.15	66.086	84.3575
		2.15417	62.6425	84.5339
		2.15833	58.5204	82.0769
		2.1625	59.9276	79.8688
		2.16667	49.7919	78.7104
		2.17083	47.5294	76.4842
		2.175	54.6561	79.7466
		2.17917	68.2579	83.9412
		2.18333	73.5882	80.7511
		2.1875	72.3213	82.724
		2.19167	68.8416	82.6018
		2.19583	53.2308	79.8869
		2.2	60.1855	74.8597
		2.20417	70.3303	82.8145
		2.20833	69.0769	87.3575
		2.2125	59.7149	78.2308
		2.21667	55.2579	73.4977
		2.22083	46.7059	73.8054
		2.225	39.8054	65.1222
		2.22917	60.4163	75.5385
		2.23333	63.914	80.5566
		2.2375	52.7647	78.8552
		2.24167	56.4706	77.8688
		2.24583	57.7873	77.7466
		2.25	63.0136	81.3846
		2.25417	60.6606	77.8733
		2.25833	54.9909	73.2127
		2.2625	62.0543	77.2624
		2.26667	59.1855	78.9367
		2.27083	58.6063	78.0407
		2.275	54.0091	73.2715
		2.27917	57.0724	75.8914
		2.28333	60.2986	74.6109
		2.2875	62.9774	78.9502
		2.29167	70.0272	79.8461
		2.29583	65.905	82.3439
		2.3	64.8869	78.9955
		2.30417	75.0498	80.0679
		2.30833	74.8642	82.724
		2.3125	76.4299	88.2308
		2.31667	67.629	87.6833
		2.32083	60.543	78.1629
		2.325	68.9548	81.1086
		2.32917	68.4027	82.724
		2.33333	74.3484	83.1448
		2.3375	77.6833	82.0995
		2.34167	76.905	83.8959
		2.34583	79.3982	83.8824
		2.35	79.3756	84.7692
		2.35417	79.095	85.7828
		2.35833	78.8824	82.0362
		2.3625	81.7285	83.3801
		2.36667	74.4163	86.9321
		2.37083	76.448	83.9593
		2.375	77.8733	85.371
		2.37917	77.4389	82.3348
		2.38333	80.8145	85.2805
		2.3875	81.0769	85.3213
		2.39167	79.7149	86.0905
		2.39583	82.2353	86.8371
		2.4	84.0272	84.6697
		2.40417	80.6018	81.9005
		2.40833	83.2353	84.371
		2.4125	80.0543	85.3213
		2.41667	78.2353	83.1267
		2.42083	76.181	83.1403
		2.425	80.7873	82.9683
		2.42917	79.457	83.5747
		2.43333	78.3891	84.914
		2.4375	79.3303	80.7466
		2.44167	80.8552	81.1493
		2.44583	81.2579	80.9231
		2.45	78.8416	83.3484
		2.45417	77.5113	83.7918
		2.45833	77.1403	82
		2.4625	80.9321	84.371
		2.46667	82.9774	79.7285
		2.47083	81.8688	81.3801
		2.475	84.8778	77.2353
		2.47917	80.4615	81.6109
		2.48333	79.7919	82.8914
		2.4875	81.8326	81.9683
		2.49167	81.0498	81.4615
		2.49583	83.8869	82.3122
		2.5	80.638	81.1176
		2.50417	79.6063	82.9321
		2.50833	76.3122	80.7783
		2.5125	72.1176	81.5792
		2.51667	60.0181	71.3167
		2.52083	63.3167	74.6833
		2.525	69.1991	81.0181
		2.52917	72.5113	79.1584
		2.53333	79.2036	81.6878
		2.5375	81.6606	83.7014
		2.54167	82.1267	84.81
		2.54583	82.267	81.7647
		2.55	76.6923	83.095
		2.55417	79.9276	83.7602
		2.55833	80.7059	85.5656
		2.5625	82.4977	84.3756
		2.56667	85.2262	84.7647
		2.57083	80.9864	83.4932
		2.575	82.3937	82.9502
		2.57917	82.1176	82.0588
		2.58333	84.5611	83.5339
		2.5875	92.2941	86.1946
		2.59167	79.7919	82.3891
		2.59583	71.1855	74.8869
		2.6	53.1765	60.9095
		2.60417	44.6244	56.6606
		2.60833	65.086	72.2353
		2.6125	73.3032	75.3167
		2.61667	77.2579	80.4525
		2.62083	79.905	81.9593
		2.625	79.6561	79.7828
		2.62917	82.2805	83.8642
		2.63333	82.1629	83.3937
		2.6375	77.9819	78.7783
		2.64167	79.4796	82.7149
		2.64583	82.0045	81.5792
		2.65	81.5973	82.7511
		2.65417	80.7557	81.6471
		2.65833	80.3122	84.0452
		2.6625	73.5928	80.2262
		2.66667	79.3756	82.181
		2.67083	77.4796	85.1312
		2.675	72.276	82.8009
		2.67917	73.1086	79.457
		2.68333	71.3394	79.1539
		2.6875	76.0226	83.9593
		2.69167	74.5068	81.2353
		2.69583	74.5747	81.3077
		2.7	71.5294	80.2851
		2.70417	76.0769	79.6109
		2.70833	75.1358	77.9005
		2.7125	73.4434	84.5973
		2.71667	74.1765	82.19
		2.72083	74.267	82.4027
		2.725	75.9819	81.7692
		2.72917	75.7466	79.4072
		2.73333	68.9321	81.4072
		2.7375	70.733	83.267
		2.74167	69.6697	82.0679
		2.74583	71.7692	83.1086
		2.75	73.7964	84.6244
		2.75417	68.7285	79.4977
		2.75833	75.1041	81.0633
		2.7625	75.6968	82.914
		2.76667	77.3122	81.7014
		2.77083	81.3303	77.638
		2.775	80.3665	79.1539
		2.77917	80.9774	83.3529
		2.78333	79.8914	80.6968
		2.7875	81.6244	82.1946
		2.79167	77.8235	84.3891
		2.79583	80.7149	81.9095
		2.8	83.448	78.8642
		2.80417	84.3167	76.8009
		2.80833	85.0995	82.9819
		2.8125	74.9819	84.7195
		2.81667	76.3439	84.9683
		2.82083	77.1991	83.3937
		2.825	78.6742	85.2805
		2.82917	80.9819	83.8281
		2.83333	80.4932	82.1176
		2.8375	82.5701	81.6063
		2.84167	81.3937	82.2805
		2.84583	79.9593	83.6878
		2.85	80.6471	84.5611
		2.85417	77.0724	84.5339
		2.85833	79.6652	81.6652
		2.8625	77.9774	83.2579
		2.86667	80.5204	85.0679
		2.87083	82.8371	85.3439
		2.875	80.0226	86.1222
		2.87917	82.8235	82.4027
		2.88333	83.2308	81.9683
		2.8875	80.2217	81.8371
		2.89167	83.3258	83.5294
		2.89583	80.6516	87.1584
		2.9	79.3032	81.4118
		2.90417	80.9909	86.8733
		2.90833	80.181	82.5701
		2.9125	77.7964	83.8371
		2.91667	78.7919	84.9231
		2.92083	79.638	84.2624
		2.925	77.4072	83.8235
		2.92917	80.0272	85.5113
		2.93333	82.9276	85.457
		2.9375	83.3213	85.2715
		2.94167	79.7376	83.1629
		2.94583	79.8642	84.6561
		2.95	84.6154	83.3258
		2.95417	83.0769	84.3575
		2.95833	79.5747	82.0815
		2.9625	80.6471	83.2398
		2.96667	81.2081	81.7557
		2.97083	82.8733	82.8416
		2.975	84.1493	84.8869
		2.97917	81.5068	83.5023
		2.98333	81.9728	87.7738
		2.9875	82.7104	81.638
		2.99167	82.362	87.3756
		2.99583	81.7647	84.4118
		3	82.0543	87.3484
		3.00417	85.5792	81.8281
		3.00833	84.9909	83.8235
		3.0125	81.9005	83.8054
		3.01667	83.1176	84.6063
		3.02083	85.7964	85.2896
		3.025	84.7195	85.4661
		3.02917	85.8552	91.8733
		3.03333	74.0588	77.4434
		3.0375	81.6199	82.2579
		3.04167	78.4706	86.2534
		3.04583	81.7557	85.1312
		3.05	78.7828	78.8688
		3.05417	59.9412	58.0226
		3.05833	77.733	82.0815
		3.0625	79.7511	84.552
		3.06667	83.552	80.6878
		3.07083	81.1493	85.0136
		3.075	84.6335	83.3032
		3.07917	80.7149	84.2172
		3.08333	79.6471	82.819
		3.0875	82.4842	88.5882
		3.09167	81.9683	85.5294
		3.09583	82.9909	88.1222
		3.1	83.3801	84.6968
		3.10417	85.5158	86.2534
		3.10833	79.9095	85.0181
		3.1125	77.1946	74.9909
		3.11667	77.8733	80.5747
		3.12083	81.6063	79.9005
		3.125	80.4163	79.9909
		3.12917	80.276	85.086
		3.13333	83.4751	86.6968
		3.1375	85.0815	86.7195
		3.14167	79.1176	76.6697
		3.14583	79.2217	78.8869
		3.15	77.733	78.3801
		3.15417	80.8235	83.0588
		3.15833	82.5204	89.7466
		3.1625	84.5611	91.0272
		3.16667	80.6923	84.8009
		3.17083	79.371	81.2805
		3.175	80.7059	85.7602
		3.17917	84.2127	84.1584
		3.18333	86.8688	91.4344
		3.1875	77.8461	79.552
		3.19167	79.2534	83.6335
		3.19583	81.3394	85.3303
		3.2	82.3077	87.4796
		3.20417	83.3801	83.8869
		3.20833	81.0136	87.6018
		3.2125	84.1403	88.0679
		3.21667	81.0679	82.3348
		3.22083	80.6742	82.2579
		3.225	81.7647	84.1674
		3.22917	84.0543	87.7602
		3.23333	80.4208	82.3439
		3.2375	83.0498	86.4842
		3.24167	84.8009	84.6154
		3.24583	80.086	80.8733
		3.25	78.1719	79.905
		3.25417	80.2172	77.6697
		3.25833	72.6561	77.8552
		3.2625	73.0226	78.3258
		3.26667	71.6018	75.9502
		3.27083	72.0995	74.7014
		3.275	75.4344	79.0724
		3.27917	74.7557	79.9638
		3.28333	72.3529	82.5475
		3.2875	73.2353	82.819
		3.29167	77.2805	84.0815
		3.29583	78.8733	85.3529
		3.3	80.9005	85.9774
		3.30417	79.6833	82.181
		3.30833	78.7376	85.0588
		3.3125	80.9412	88.3394
		3.31667	79.5068	85.086
		3.32083	81.9185	88.3756
		3.325	78.5611	85.6878
		3.32917	81.276	85.7602
		3.33333	78.7466	85.6425
		3.3375	78.4615	84.6787
		3.34167	78.3394	89.2398
		3.34583	69.0543	68.1312
		3.35	74.8552	69.3394
		3.35417	72.3891	71.7557
		3.35833	80.8371	82.1855
		3.3625	79.9819	82.7738
		3.36667	77.8597	79.9231
		3.37083	80.5701	85.4706
		3.375	82.4163	84.4932
		3.37917	81.4389	84.6878
		3.38333	83.0815	88.8281
		3.3875	81.8145	89.5385
		3.39167	82.8688	89.2262
		3.39583	79.8145	87.4887
		3.4	80.2081	86.6516
		3.40417	79.733	86.4525
		3.40833	82.5249	87.2172
		3.4125	80.7828	87.448
		3.41667	83.7466	87.1946
		3.42083	80.0679	87.7059
		3.425	78.1855	86.0407
		3.42917	82.8371	84.3303
		3.43333	81.2624	84.7195
		3.4375	79.7738	85.7376
		3.44167	82.8507	87.9502
		3.44583	82.1086	86.7964
		3.45	84.1946	86.4525
		3.45417	79.8869	87.0905
		3.45833	80.6471	86.4796
		3.4625	81.2353	87.9457
		3.46667	80.2489	87.5973
		3.47083	81.6697	85.0045
		3.475	83.4751	83.0633
		3.47917	80.3077	84.362
		3.48333	83.5339	83.3032
		3.4875	80.2217	83.4434
		3.49167	78.2262	82.0588
		3.49583	81.5068	81.2127
		3.5	80.724	86.5475
		3.50417	76.4887	82.1312
		3.50833	77.4389	84.6154
		3.5125	78.2443	83.1991
		3.51667	77.9005	85.0724
		3.52083	79.7376	82.7149
		3.525	78.1719	83.5339
		3.52917	83.9367	88.8416
		3.53333	85.7104	85.8416
		3.5375	81.7647	85.2941
		3.54167	81.5249	85.3439
		3.54583	83.7647	84.7964
		3.55	84.1267	83.5701
		3.55417	82.7376	83.0136
		3.55833	79.8914	84.5475
		3.5625	82.0724	81.0815
		3.56667	82.9638	87.7285
		3.57083	79.0995	86.2941
		3.575	75.1041	85.0543
		3.57917	78.7376	84.7195
		3.58333	82.6335	83.724
		3.5875	78.7149	84.3439
		3.59167	84.1403	87.4615
		3.59583	84.0317	86.2308
		3.6	83.2715	85.4344
		3.60417	78.6878	85.9909
		3.60833	81.3213	86.6199
		3.6125	81.7466	85.7918
		3.61667	78.2534	86.9638
		3.62083	83.1946	89.4796
		3.625	79.9231	85.2353
		3.62917	83.2353	88.3348
		3.63333	85.6968	87.6923
		3.6375	79.8959	84.1991
		3.64167	82.1041	87.2308
		3.64583	77.2986	85.4072
		3.65	77.81	84.2941
		3.65417	81.2172	86.4887
		3.65833	79.1629	84.2308
		3.6625	81.2398	82.9864
		3.66667	80.0995	84.1629
		3.67083	81.9909	86.81
		3.675	78.552	87.0498
		3.67917	80.5973	84.086
		3.68333	78.4434	84.5837
		3.6875	76.6109	87.457
		3.69167	79.3258	84.7873
		3.69583	79.3303	83.4525
		3.7	78.9457	83.8642
		3.70417	75.9955	83.8824
		3.70833	80.4796	89.1674
		3.7125	79.9005	86.5339
		3.71667	69.362	74.8778
		3.72083	76.1629	82.2805
		3.725	78.0815	86.8733
		3.72917	76.9593	84.0407
		3.73333	76.0995	80.4344
		3.7375	76.2805	79.1719
		3.74167	72.7376	80.7738
		3.74583	80.4887	88.4842
		3.75	75.4434	84.3846
		3.75417	77.3891	85.5928
		3.75833	78.4842	83.8597
		3.7625	80.6878	87.0498
		3.76667	76.6561	87.638
		3.77083	78.4253	81.0452
		3.775	78.6154	85.4118
		3.77917	75.086	80.1448
		3.78333	79.4615	85.0543
		3.7875	76.3982	83.4977
		3.79167	77.3529	84.6742
		3.79583	76.1629	83.5204
		3.8	73.371	81.4932
		3.80417	77.4389	82.905
		3.80833	79.2443	85.2489
		3.8125	78.086	84.2489
		3.81667	77.4344	83.8914
		3.82083	79.371	85.7738
		3.825	80.2308	86.6516
		3.82917	71.7149	77.1539
		3.83333	73.8914	78.9321
		3.8375	73.7195	79.9276
		3.84167	80.457	84.9412
		3.84583	77.2398	83.4072
		3.85	79.0815	84.0679
		3.85417	77.3348	83.9548
		3.85833	77.7466	87.371
		3.8625	79.7421	82.9321
		3.86667	80.5928	85.267
		3.87083	79.2534	85.3937
		3.875	76.6425	83.19
		3.87917	76.8009	84.0045
		3.88333	81.4389	86.4932
		3.8875	76.3575	88.5068
		3.89167	72.9502	84.0045
		3.89583	72.3439	81.8281
		3.9	75.6742	84.3846
		3.90417	78.6335	85.8824
		3.90833	79.8914	83.2262
		3.9125	74.3303	87.6154
		3.91667	77.3891	85.0498
		3.92083	74.7873	87.3529
		3.925	76.9231	84.7014
		3.92917	75.8281	83.1719
		3.93333	77.8688	87.1946
		3.9375	74.914	87.0724
		3.94167	73.81	84.4344
		3.94583	76.2896	87.3756
		3.95	76.0452	84.9276
		3.95417	76.2443	83.4932
		3.95833	75.9412	84.543
		3.9625	75.7964	80.7783
		3.96667	77.1946	87.4615
		3.97083	76.552	86.6923
		3.975	79.4208	91.9276
		3.97917	77.3439	84.9457
		3.98333	79.3348	83.8507
		3.9875	79.2127	87.1222
		3.99167	79.6471	84.371
		3.99583	79.0905	85.8733
		4	76.9412	87.8054
		4.00417	79.9909	84.8461
		4.00833	78.0452	87.1176
		4.0125	77.3258	84.5158
		4.01667	78.543	82.4615
		4.02083	71.4796	80.3032
		4.025	71.0407	81.724
		4.02917	72.0724	82.4796
		4.03333	75.7919	85.3846
		4.0375	73.1674	81.5611
		4.04167	75.7602	87.9231
		4.04583	77.8914	88.7421
		4.05	76.0815	83.6968
		4.05417	81.8054	92.8914
		4.05833	78.9819	85.8416
		4.0625	80.9367	90.9683
		4.06667	75.1176	83.7195
		4.07083	75.1629	85.0045
		4.075	76.9367	85.9774
		4.07917	78.6652	86.8281
		4.08333	74.1403	83.8959
		4.0875	73.6968	77.6335
		4.09167	74.2534	75.2896
		4.09583	73.5882	79.1539
		4.1	73.8054	79.4434
		4.10417	75.9095	82.8959
		4.10833	77.3077	85.9683
		4.1125	77.3213	85.0317
		4.11667	77.6742	85.1267
		4.12083	77.2127	84.457
		4.125	81.1493	88.6199
		4.12917	78.9955	85.1267
		4.13333	77.9321	84.3213
		4.1375	76.3348	83.81
		4.14167	76.7738	82.9367
		4.14583	75.629	80.4842
		4.15	76.6742	79.3077
		4.15417	79.5385	86.81
		4.15833	80.2489	87.5792
		4.1625	78.543	86.3213
		4.16667	79.543	91.8281
		4.17083	77.0317	87.6561
		4.175	74.6787	86.7602
		4.17917	75.9367	85.1403
		4.18333	80.9276	85.629
		4.1875	78.4751	87.3258
		4.19167	76.19	87.0543
		4.19583	78.9683	88.1448
		4.2	79.5475	86.5158
		4.20417	77.5701	83.5792
		4.20833	74.4027	83.8959
		4.2125	77.9095	80.276
		4.21667	78.638	84.0407
		4.22083	75.2262	79.2489
		4.225	77.7059	80.7873
		4.22917	81.2262	85.8371
		4.23333	76.6968	85.0543
		4.2375	77.0815	78.9367
		4.24167	72.9367	78.9548
		4.24583	75.0045	77.6561
		4.25	73.267	73.371
		4.25417	74.2986	75.0543
		4.25833	79.2624	84.095
		4.2625	76.7873	86.1267
		4.26667	80.5158	85.2036
		4.27083	79.267	85.3122
		4.275	78.095	83.3394
		4.27917	80.9005	84.1403
		4.28333	81.5113	80.1584
		4.2875	81.5747	94.7918
		4.29167	80.7376	86.1629
		4.29583	79.1358	86.5294
		4.3	81.1131	83.9412
		4.30417	83.8552	90.0588
		4.30833	71.276	84.8733
		4.3125	73.7647	81.8416
		4.31667	72.6109	84.9276
		4.32083	76.7376	86.7014
		4.325	77.6018	87.5611
		4.32917	77.2127	93.2308
		4.33333	74.8281	84.2805
		4.3375	75.7376	87.8642
		4.34167	76.914	88.9548
		4.34583	75.4796	84.448
		4.35	80.0679	91.0272
		4.35417	76.6244	87.9457
		4.35833	76.9276	86.2941
		4.3625	76.0995	88.5339
		4.36667	73.9095	85.7149
		4.37083	77.0995	88.4208
		4.375	74.7421	89.1946
		4.37917	76.8688	87.7466
		4.38333	77.6063	92.1719
		4.3875	74.276	89.0588
		4.39167	70.6833	84.2534
		4.39583	74.1086	85.4661
		4.4	77.2443	84.7602
		4.40417	78.1131	86.5158
		4.40833	74.9185	85.7557
		4.4125	71.4299	82.724
		4.41667	68.9774	80.1448
		4.42083	73.0543	81.0543
		4.425	66.0543	77.095
		4.42917	67.7738	78.1991
		4.43333	72.7873	85.7014
		4.4375	77.5928	88.4751
		4.44167	72.7376	85.8054
		4.44583	67.3303	82.4118
		4.45	70.6697	81.4027
		4.45417	62.19	79.3891
		4.45833	72.1946	85.2127
		4.4625	76.2308	84.5204
		4.46667	79.1493	84.5792
		4.47083	79.6923	86.6606
		4.475	79.4344	86.1946
		4.47917	78.1991	83.6471
		4.48333	78.9955	86.6154
		4.4875	79.6561	86.3982
		4.49167	79.8959	85.7738
		4.49583	80.6018	90.8914
		4.5	76.7919	85.9909
		4.50417	77.7195	86.9185
		4.50833	71.6652	85.6471
		4.5125	76.3348	85.5249
		4.51667	78.2443	86.7104
		4.52083	81.9005	85.6199
		4.525	78.1222	86.2715
		4.52917	81.1629	88.2986
		4.53333	78.8009	87.1131
		4.5375	77.0272	87.7195
		4.54167	75.7149	83.4615
		4.54583	74.8824	82.3756
		4.55	74.9638	79.3484
		4.55417	78.3529	89.5837
		4.55833	76.8914	89.4706
		4.5625	78.9095	90.0588
		4.56667	79.8824	87.3756
		4.57083	76.1629	87.8235
		4.575	76.8597	89.4706
		4.57917	77.1539	90.3665
		4.58333	78.276	88.457
		4.5875	75.4208	87.7873
		4.59167	79.6063	86.4344
		4.59583	79.6968	86.1403
		4.6	77.7195	87.19
		4.60417	77	86.9457
		4.60833	78.095	88.6606
		4.6125	79.9502	85.0407
		4.61667	80.4208	94.6923
		4.62083	77.3529	86.362
		4.625	78.181	86.6516
		4.62917	77.2217	83.3032
		4.63333	75.5113	83.0317
		4.6375	79.8778	87.181
		4.64167	78.0905	84.8959
		4.64583	78.3122	84.8597
		4.65	63.7738	76.6561
		4.65417	67.1222	82.457
		4.65833	76.095	86.267
		4.6625	72.2353	84.9457
		4.66667	70.5973	83.8416
		4.67083	70.8235	86.5701
		4.675	75.5882	87.0317
		4.67917	74.362	84.629
		4.68333	70.3484	84.4977
		4.6875	74.5566	86.3122
		4.69167	76.1448	87.2443
		4.69583	74.3801	87.9321
		4.7	72.9367	88.362
		4.70417	60.3439	81.7828
		4.70833	64.7828	79.6154
		4.7125	71.7919	84.1946
		4.71667	74.8009	85.9728
		4.72083	73.448	86.5701
		4.725	73.5566	84.8281
		4.72917	75.6244	86.4977
		4.73333	73.5928	87.6154
		4.7375	77.7828	89.1674
		4.74167	75.0498	86.6425
		4.74583	73.1584	83.8914
		4.75	77.1991	91.9683
		4.75417	78.3484	90.5023
		4.75833	75.7783	86.2398
		4.7625	78.8733	94.1674
		4.76667	75.3167	86.4661
		4.77083	74.9412	84.4661
		4.775	72.2896	87.3529
		4.77917	73.5792	89.3982
		4.78333	76.1222	88.9683
		4.7875	81.2262	82.638
		4.79167	78.9774	85.4887
		4.79583	77.9638	82.8371
		4.8	77.4932	85.7783
		4.80417	80.448	88.5928
		4.80833	71.2217	88.638
		4.8125	71.267	87.7738
		4.81667	66.7104	83.9683
		4.82083	72.6516	84.3122
		4.825	72.2896	88.0724
		4.82917	71.2081	84.5747
		4.83333	69.3529	83.1267
		4.8375	70.3122	81.5882
		4.84167	74.8145	85.2443
		4.84583	77.914	85.6606
		4.85	77.1946	86.371
		4.85417	74.8824	86.1674
		4.85833	77.267	85.4344
		4.8625	76.5882	85.3167
		4.86667	74.5294	88.8597
		4.87083	78.5294	88.1448
		4.875	78.4751	85.4027
		4.87917	79.1041	86.7647
		4.88333	74.4208	84.2624
		4.8875	74.3439	85.276
		4.89167	74.4661	83.8009
		4.89583	71.3937	80.724
		4.9	74.6063	84.1176
		4.90417	78.362	88.7692
		4.90833	77.3303	83.4525
		4.9125	77.5566	86.0769
		4.91667	78.6787	90.0181
		4.92083	78.4977	93.7783
		4.925	72.4887	85.5792
		4.92917	73.3032	83.7557
		4.93333	68.9638	80.3801
		4.9375	52.6787	65.4932
		4.94167	59.4525	76.2805
		4.94583	58.095	72.6878
		4.95	59.4344	69.552
		4.95417	61.638	75.0362
		4.95833	65.2941	78.3394
		4.9625	68.6606	82.3258
		4.96667	70.7149	83.5294
		4.97083	71.8733	82.8642
		4.975	75.7783	86.5294
		4.97917	77.7059	88.1629
		4.98333	80.181	89.1539
		4.9875	77.5792	86.6833
		4.99167	77.8054	87.8959
		4.99583	79.6968	93.1719
		5	70.6923	85.7104
		5.00417	62.905	75.4977
		5.00833	67.9909	80.1176
		5.0125	72.8869	85.5792
		5.01667	74.3077	88.6109
		5.02083	73.6018	88.6968
		5.025	73.4615	85.9683
		5.02917	72.543	85.6878
		5.03333	75.0226	87.0905
		5.0375	75.4842	85.8778
		5.04167	76.0362	88.1222
		5.04583	74.5701	86.6561
		5.05	73.0769	89.1176
		5.05417	71.0452	84.5656
		5.05833	69.086	83.0091
		5.0625	70.7783	82.1765
		5.06667	73.5113	86.5158
		5.07083	74.9593	86.6335
		5.075	78	88.6199
		5.07917	71.0815	93.9367
		5.08333	71.3846	83.8959
		5.0875	73.9367	87.371
		5.09167	75.6244	89.7918
		5.09583	78.5701	84.5701
		5.1	76.1991	84.8009
		5.10417	76.3801	84.0091
		5.10833	75.1539	84.9864
		5.1125	78.1539	81.7647
		5.11667	74.552	86.7511
		5.12083	74.8733	88.1448
		5.125	69.4615	84.0905
		5.12917	72.6606	87.4932
		5.13333	72.7421	86.6968
		5.1375	73.552	85.0091
		5.14167	71.7738	87.6018
		5.14583	76.0452	85.9683
		5.15	76.3529	87.5204
		5.15417	80.9367	86.8416
		5.15833	78.3439	83.9502
		5.1625	78.3801	88.2624
		5.16667	79.543	86.1448
		5.17083	75.9276	83.1041
		5.175	80.7104	87.9276
		5.17917	75.8416	83.4751
		5.18333	79.7919	89.4072
		5.1875	74.7602	85.0136
		5.19167	75.3484	88.1629
		5.19583	82.1539	85.2353
		5.2	77.6833	85.7964
		5.20417	78.3982	85.0679
		5.20833	77.0045	86.371
		5.2125	80.7873	83.1674
		5.21667	76.4615	87.8688
		5.22083	73.9231	85.7738
		5.225	73.7421	90.8281
		5.22917	73.1267	86.2217
		5.23333	78.0272	87.724
		5.2375	77.6516	87.4751
		5.24167	80.4932	85.5792
		5.24583	75.5882	87.1765
		5.25	77.905	88.5656
		5.25417	78.5611	89.1222
		5.25833	80.3032	85.1267
		5.2625	78.9367	86.7104
		5.26667	79.4887	86.0091
		5.27083	78.2534	84.8552
		5.275	77.0633	89.1041
		5.27917	76.2036	86.1674
		5.28333	74.2986	85.7738
		5.2875	70.7104	84.8733
		5.29167	68.7602	85.2624
		5.29583	74.9502	88.0091
		5.3	68.9593	89.0091
		5.30417	71.819	87.3394
		5.30833	75.3801	87.2082
		5.3125	76.0498	85.7149
		5.31667	77.7376	86.2127
		5.32083	74.2986	93.2082
		5.325	70.7919	88.4072
		5.32917	75.6018	86.7828
		5.33333	75.1448	86.6697
		5.3375	76.7692	89.5339
		5.34167	76.4615	87.5158
		5.34583	79.1448	88.3891
		5.35	73.362	84.2534
		5.35417	74.8824	88.5385
		5.35833	78.095	90.81
		5.3625	76.0724	87.0226
		5.36667	79.6968	88.8235
		5.37083	79.086	85.4344
		5.375	77.3439	88.0226
		5.37917	76.2443	86.6923
		5.38333	75.8507	91.9638
		5.3875	79.8869	87.6471
		5.39167	79.7421	93.9909
		5.39583	74.3937	88.81
		5.4	76.0815	84.7738
		5.40417	74.0272	80.8914
		5.40833	77.5068	83.7602
		5.4125	75.4118	84.3213
		5.41667	74.0407	85.4932
		5.42083	74.0407	87.3982
		5.425	74.6471	82.5249
		5.42917	74.905	86.9321
		5.43333	76.2896	80.371
		5.4375	78.4072	81.1946
		5.44167	76.2941	86.086
		5.44583	76.3394	79.2715
		5.45	73.7059	77.1448
		5.45417	75.3756	80.1629
		5.45833	77.4389	78.3937
		5.4625	77.9321	79.6063
		5.46667	78.5158	90.5566
		5.47083	75.9457	85.0588
		5.475	75.4661	86.9276
		5.47917	74.2489	80.3982
		5.48333	72.4796	78.7647
		5.4875	73.2715	82.2353
		5.49167	76.2217	86.3394
		5.49583	73.5656	84.5204
		5.5	72.7692	77.3891
		5.50417	74.7149	80.5747
		5.50833	74.6199	82.8326
		5.5125	76.3077	81.638
		5.51667	72.8009	81.19
		5.52083	74.8054	82.0407
		5.525	73.9276	87.0181
		5.52917	77.5249	87.8145
		5.53333	76.9819	86.6697
		5.5375	73.3529	85.3484
		5.54167	72.914	82.4796
		5.54583	73.8371	85.3846
		5.55	73.1041	81.1946
		5.55417	76.3213	84.7918
		5.55833	71.2308	83.724
		5.5625	72.9005	85.1946
		5.56667	74.4163	88.1765
		5.57083	71.8552	86.2896
		5.575	76.4344	85.5294
		5.57917	74.6018	92.2579
		5.58333	73.7602	86.629
		5.5875	75.5792	86.8281
		5.59167	75.905	82.1403
		5.59583	74.0045	85.1358
		5.6	72.5656	83.1719
		5.60417	72.3213	78.4027
		5.60833	73.8145	81.7918
		5.6125	74.4887	84.5475
		5.61667	74.7014	85.9683
		5.62083	73.7466	86.0905
		5.625	75.6697	83.3032
		5.62917	70.7828	82.2353
		5.63333	74.9005	78.0407
		5.6375	75.4434	87.6063
		5.64167	71.9548	86.8054
		5.64583	76.2127	81.1765
		5.65	76.6606	82.8371
		5.65417	73.7511	83.5204
		5.65833	74.5249	84.19
		5.6625	74.2851	83.5294
		5.66667	74.0679	86.2082
		5.67083	75.3167	87.2896
		5.675	77.8416	83.4434
		5.67917	73.8824	83.7285
		5.68333	75.9231	82.1493
		5.6875	72.8507	79.9185
		5.69167	75.7828	84.5747
		5.69583	72.914	83.819
		5.7	73.0633	89.5068
		5.70417	70.9728	82.6606
		5.70833	71.267	82.1267
		5.7125	72.4706	84.9683
		5.71667	74.8054	84.2534
		5.72083	70.3032	81.7738
		5.725	72.7376	85.2353
		5.72917	73.4253	82.5701
		5.73333	73.4389	84.5656
		5.7375	74.7738	88.0226
		5.74167	70.0362	83.7104
		5.74583	70.1448	81.4706
		5.75	69.2398	82.3394
		5.75417	72.733	84.543
		5.75833	73.2398	84.4887
		5.7625	73.0679	86.362
		5.76667	74.8733	85.6244
		5.77083	72.6154	85.2896
		5.775	75.1991	85.5973
		5.77917	73.9321	84.276
		5.78333	70.1719	84.0498
		5.7875	72.1358	84.2217
		5.79167	73.7828	84.1539
		5.79583	70.4434	82.8281
		5.8	71.6109	74.9095
		5.80417	71.0543	79.4344
		5.80833	74.3846	85.362
		5.8125	76.5204	87.2489
		5.81667	71.7828	83.4118
		5.82083	72.7059	80.1674
		5.825	70.3756	78.4253
		5.82917	70.629	76.6697
		5.83333	71.905	78.6787
		5.8375	72.5385	81.8009
		5.84167	72.9005	78.3394
		5.84583	73.8733	82.8552
		5.85	71.543	82.0543
		5.85417	73	83.086
		5.85833	71.4615	81.5566
		5.8625	70.9231	80.0091
		5.86667	72.6109	78.6561
		5.87083	71.9502	80.7738
		5.875	70.0045	81.1855
		5.87917	73.2896	80
		5.88333	75.1674	82.8869
		5.8875	72.1312	81.1629
		5.89167	73.3756	80.3529
		5.89583	74.5611	83.3167
		5.9	73.3258	80.6968
		5.90417	76.457	78.3484
		5.90833	75.7195	88.9774
		5.9125	71.3801	83.4887
		5.91667	71.2308	83.2308
		5.92083	70.9683	81.5158
		5.925	72.9502	78.1131
		5.92917	67.7602	71.181
		5.93333	71.3937	71.2534
		5.9375	72.2081	78.7104
		5.94167	74.4253	79.1222
		5.94583	72.7873	81.7511
		5.95	74.6244	86.8642
		5.95417	66.9683	80.5113
		5.95833	60.6244	74.724
		5.9625	63.914	76.8597
		5.96667	68.19	81.5792
		5.97083	70.3348	79.9593
		5.975	72.8371	79.1629
		5.97917	69.5792	82.2715
		5.98333	74.3756	76.9864
		5.9875	73.3665	76.8733
		5.99167	74.724	79.638
		5.99583	71.4027	83.0905
		6	70.7149	83.371
		6.00417	71.4887	79.457
		6.00833	72.3122	80.9321
		6.0125	71.9005	72.2851
		6.01667	74.7602	76.2036
		6.02083	72.1719	74.4977
		6.025	73.4706	83.2443
		6.02917	71.5792	81.4615
		6.03333	69.6652	81.8507
		6.0375	71.5792	82.2941
		6.04167	70.5249	81.2217
		6.04583	72.0905	83.2443
		6.05	69.3982	85.9412
		6.05417	73.1493	77.7421
		6.05833	70.0633	74.2851
		6.0625	71.6516	72.5792
		6.06667	71.0226	76.9774
		6.07083	71.2172	77.5113
		6.075	70.5837	81.0498
		6.07917	69.9548	83.2579
		6.08333	71.0498	80.3756
		6.0875	72.3394	81.8507
		6.09167	74.9638	82.2082
		6.09583	71.4027	82.8281
		6.1	71.8281	82.4299
		6.10417	71.1493	86.6923
		6.10833	68.0091	80.448
		6.1125	71.2579	84.1629
		6.11667	72.6697	82.7059
		6.12083	73.914	81.2624
		6.125	70.6516	82.0272
		6.12917	69.8507	82.2398
		6.13333	73.1176	83.2624
		6.1375	73.2579	81.7466
		6.14167	68.8869	81.2353
		6.14583	71.5294	77.9095
		6.15	71.4661	74.4072
		6.15417	73.3439	77.7511
		6.15833	75.5973	85.1493
		6.1625	68.6561	81.7285
		6.16667	66.4389	80.6018
		6.17083	57.2127	76.5837
		6.175	64.086	78.638
		6.17917	65.638	82.2534
		6.18333	69.7964	82.2308
		6.1875	70.552	84.6199
		6.19167	72.5385	81.1719
		6.19583	71.4661	80.5747
		6.2	72.4842	79.2715
		6.20417	76.4706	81.8642
		6.20833	71.2941	82.457
		6.2125	71.6697	81.5928
		6.21667	69.7828	85.0181
		6.22083	72.181	84.4932
		6.225	71.9276	81.5294
		6.22917	71.1358	83.1765
		6.23333	76.4887	80.4027
		6.2375	69.5204	81.2036
		6.24167	69.1041	86.3394
		6.24583	68.1539	80.7964
		6.25	68.7149	84.6244
		6.25417	73.3439	82.638
		6.25833	71.1946	80.8054
		6.2625	75.19	78.8371
		6.26667	72.9728	83.5249
		6.27083	70.3258	82.5113
		6.275	69.6335	81.8145
		6.27917	70.0226	82.4932
		6.28333	72.8009	82.3122
		6.2875	72.1312	82.0136
		6.29167	74.7602	82.2805
		6.29583	73.8416	87.086
		6.3	72.4796	81.9728
		6.30417	71.2398	79.1719
		6.30833	72.6425	81.7873
		6.3125	71.4977	81.1493
		6.31667	73.8235	81.4932
		6.32083	72.2896	78.1674
		6.325	70.9864	77.8597
		6.32917	74.1131	78.4389
		6.33333	75.2715	78.4661
		6.3375	72.6425	80.5792
		6.34167	72.0091	83.1131
		6.34583	67.276	79.5837
		6.35	71.5113	79.5792
		6.35417	71.8914	83.2262
		6.35833	71.5656	81.3394
		6.3625	69.9548	81.0091
		6.36667	72.9276	82.8009
		6.37083	71.5792	80.0995
		6.375	69.552	88.6018
		6.37917	64.3891	74.4027
		6.38333	69.2443	78.4344
		6.3875	75.5566	87.0317
		6.39167	72.5385	85
		6.39583	72.1629	81.7828
		6.4	71.9638	82.3258
		6.40417	71.457	86.4661
		6.40833	67.4751	81.8914
		6.4125	70.4932	82.6018
		6.41667	72.3982	83.2715
		6.42083	70.5611	81.5882
		6.425	70.6606	82.6742
		6.42917	72.1222	83.2805
		6.43333	74.9231	79.9367
		6.4375	74.4615	85.2443
		6.44167	50.5792	70.0633
		6.44583	46.1312	59.0317
		6.45	57.629	69.6833
		6.45417	60.3167	72.3348
		6.45833	67.8959	79.9593
		6.4625	72.3529	84.0633
		6.46667	69.9638	79.9185
		6.47083	71.3394	81.4027
		6.475	66.3348	79.0769
		6.47917	65.9593	81.0091
		6.48333	69.2172	80.1086
		6.4875	69.4299	77.8235
		6.49167	70.4661	82.6833
		6.49583	72.5475	87.3077
		6.5	64.4072	71
		6.50417	65.3077	71.6154
		6.50833	67.3891	77.629
		6.5125	73.2579	76.914
		6.51667	69.7964	80.1131
		6.52083	73.1312	82.1448
		6.525	68.4525	75.3303
		6.52917	70.4525	77.9909
		6.53333	71.5023	77.3891
		6.5375	73.2896	82.1176
		6.54167	72.724	81.0136
		6.54583	72.7376	84.552
		6.55	68.0588	71.4887
		6.55417	66.095	73.6154
		6.55833	66.9005	77.4072
		6.5625	68.9005	77.7285
		6.56667	69.3394	77.2896
		6.57083	65.9864	77.5068
		6.575	66.0633	76.7511
		6.57917	66.5792	80.448
		6.58333	67.3801	79.7511
		6.5875	65.7873	70.8778
		6.59167	65.9185	74.81
		6.59583	68.6063	78.8009
		6.6	72.4253	78.7557
		6.60417	71.4027	81.4661
		6.60833	70.0995	76.5973
		6.6125	71.2579	77.1403
		6.61667	71.371	83.5385
		6.62083	68.1539	81.448
		6.625	70.3484	77.4661
		6.62917	71.2986	79.4163
		6.63333	73.4434	83.5068
		6.6375	69.0633	74.3937
		6.64167	70.1403	77.1629
		6.64583	72	77.1403
		6.65	69.5249	78.5566
		6.65417	74.0588	80.3258
		6.65833	72.5973	78.4661
		6.6625	70.7149	81.7918
		6.66667	56.2262	65.1765
		6.67083	55.5566	61.9638
		6.675	62.9774	69.4389
		6.67917	64.7692	71.4163
		6.68333	72.1674	78.7059
		6.6875	74.3529	82.2805
		6.69167	73.3982	86.0498
		6.69583	67.0091	79.5747
		6.7	72.9502	79.0317
		6.70417	69.9367	77.3575
		6.70833	67.81	72.5656
		6.7125	67.0091	75.6878
		6.71667	69.1131	80.724
		6.72083	70.2353	79.8461
		6.725	70.8461	79.8281
		6.72917	71.3484	80.8235
		6.73333	67.0724	77.5113
		6.7375	65.3167	75.724
		6.74167	70.2127	80.8507
		6.74583	68.5113	75.8507
		6.75	69.914	77.8009
		6.75417	69.1493	79.8281
		6.75833	63.5701	72.8009
		6.7625	67.6652	76.0815
		6.76667	64.3394	73.0452
		6.77083	63.1131	70.5973
		6.775	63.6878	70.1584
		6.77917	67.7014	74.3394
		6.78333	70.8914	78.8461
		6.7875	71.8688	79.457
		6.79167	70.0452	75.9955
		6.79583	72.4842	78.8824
		6.8	69.2986	73.6606
		6.80417	66.733	71.5566
		6.80833	65.1041	71.2624
		6.8125	66.0226	73.7014
		6.81667	62.7557	69.4932
		6.82083	68.0543	73.7466
		6.825	70.7285	75.3348
		6.82917	70.9819	78.1358
		6.83333	68.1719	81.6018
		6.8375	68.3077	79.4615
		6.84167	69.3032	74.4661
		6.84583	66.7647	76.7059
		6.85	65.3303	73.6471
		6.85417	67.8733	75.9683
		6.85833	67.9367	77.7195
		6.8625	69.3167	80.5973
		6.86667	68.5747	81.4299
		6.87083	71.9955	80.3439
		6.875	64.6471	73.7873
		6.87917	57.4887	68.371
		6.88333	66.8869	73.552
		6.8875	67.2127	75.6787
		6.89167	71.086	79.0136
		6.89583	71.8597	76.8778
		6.9	71.6833	79.4118
		6.90417	71.5158	77.9502
		6.90833	69.1403	80.7692
		6.9125	72.0815	82.0136
		6.91667	69.9367	79.4118
		6.92083	68.1222	79.2217
		6.925	55.2851	65.4389
		6.92917	52.9955	63.0407
		6.93333	65.7466	76.1131
		6.9375	68.3982	77.9774
		6.94167	72.3077	82.3439
		6.94583	67.9638	79.1041
		6.95	63.543	71.9231
		6.95417	62.7511	74.6425
		6.95833	63.3394	73.724
		6.9625	59.8733	69.4661
		6.96667	60.3846	68.5566
		6.97083	56.8869	66.1674
		6.975	62.9774	68.3032
		6.97917	56.4163	65.9548
		6.98333	57.4163	71.1176
		6.9875	61.6742	72.3303
		6.99167	62.2398	71.8552
		6.99583	61.5611	71.5294
		7	64.5837	73.3167
		7.00417	63.4118	71.7149
		7.00833	62.9412	73.4072
		7.0125	63.4796	76.362
		7.01667	60.5204	70.1674
		7.02083	61.4208	71.7149
		7.025	63.3213	73.9502
		7.02917	58.4072	70.1312
		7.03333	55.1358	68.9367
		7.0375	53.5023	67.9185
		7.04167	51.629	64.8959
		7.04583	56.3213	66.4389
		7.05	60.2624	69.9321
		7.05417	58.5249	73.6833
		7.05833	65.638	73.4027
		7.0625	68.3891	75.4434
		7.06667	67.638	75.9593
		7.07083	66.2353	78.1719
		7.075	66.4842	76.3167
		7.07917	55.7964	68.4842
		7.08333	61.1176	71.1674
		7.0875	56.362	67.6154
		7.09167	62.9683	70.2851
		7.09583	66.5294	77.0452
		7.1	67.1176	75.2082
		7.10417	63.4932	75.9095
		7.10833	62.5204	71.1358
		7.1125	62.276	72.1765
		7.11667	69.4706	75.4887
		7.12083	72.0543	78.3167
		7.125	68.095	75.181
		7.12917	66.8009	73.4118
		7.13333	68.9683	76.9683
		7.1375	65.6742	72.552
		7.14167	65.5385	74.1765
		7.14583	68.6833	76.5068
		7.15	68.9548	75.2353
		7.15417	67.5113	73.9819
		7.15833	64.362	73.9955
		7.1625	63.9638	67.8326
		7.16667	60.2398	62.6244
		7.17083	64.8326	69.9955
		7.175	64.6471	68.8824
		7.17917	67.3846	74.2624
		7.18333	67.2036	73.9185
		7.1875	61.5973	66.8416
		7.19167	64.8461	72.2715
		7.19583	64.9728	69.0633
		7.2	65.8371	70.3122
		7.20417	66.5249	69.4887
		7.20833	66.0407	74.4344
		7.2125	62.2579	65.0543
		7.21667	63.8642	69.2941
		7.22083	63.3439	70.4525
		7.225	65.4072	71.2986
		7.22917	65.2624	71.6968
		7.23333	67.3846	71.095
		7.2375	65.6063	68.7511
		7.24167	66.4615	68.5882
		7.24583	65.0226	70.3665
		7.25	61.2036	65.2082
		7.25417	57.0045	64.8281
		7.25833	59.5339	66.0769
		7.2625	58.2489	67.2579
		7.26667	63.0905	70.5294
		7.27083	62.9367	68.7059
		7.275	62.629	69.181
		7.27917	64.1946	70.2579
		7.28333	63	69.7376
		7.2875	61.4163	63.9683
		7.29167	61.3937	68.3575
		7.29583	62.7964	70.2262
		7.3	59.0996	65.2851
		7.30417	57.9367	65.0769
		7.30833	54.4344	56.8552
		7.3125	54.5249	57.0317
		7.31667	58.0814	62.1041
		7.32083	62.3439	65.2353
		7.325	57.086	60.8824
		7.32917	55.8959	56.6833
		7.33333	61.9502	68.2715
		7.3375	62.8642	66.1946
		7.34167	62.6244	67.0995
		7.34583	60.6606	66.8688
		7.35	58.0814	64.0362
		7.35417	58.4072	59.914
		7.35833	61.3303	61.5158
		7.3625	62.371	65.7421
		7.36667	61.4118	62.7602
		7.37083	62.8733	69.5249
		7.375	64.0724	68.5928
		7.37917	65.7919	68.9412
		7.38333	62.1584	66.629
		7.3875	64.1765	67.914
		7.39167	60.3665	66.7828
		7.39583	60.2217	61.2624
		7.4	61.8371	66.4072
		7.40417	65.1086	70.0679
		7.40833	66.4118	69.6878
		7.4125	67.0317	72.5249
		7.41667	68.0769	74.1584
		7.42083	63.8326	71.6516
		7.425	65.4615	70.1991
		7.42917	62.457	67.733
		7.43333	64.1765	67.5837
		7.4375	63.7376	67.724
		7.44167	61.6109	62.3122
		7.44583	60.7059	63.6109
		7.45	62.3846	64.1855
		7.45417	62.9186	67.3756
		7.45833	64.9502	69.6561
		7.4625	63.4887	65.7873
		7.46667	65.0136	62.81
		7.47083	61.7195	59.4163
		7.475	62.3258	65.3077
		7.47917	63.0136	67.9638
		7.48333	62.448	64.086
		7.4875	62.6561	65.9321
		7.49167	61.9186	64.0815
		7.49583	62.7059	63.8688
		7.5	63.1855	65.0136
		7.50417	66.2624	68.9321
		7.50833	65.2308	72.0226
		7.5125	67.6787	71.9502
		7.51667	66.0633	72.8552
		7.52083	63.733	67.9548
		7.525	59.8416	67.2398
		7.52917	62.4932	65.6471
		7.53333	63.8778	70.7104
		7.5375	64.4253	70.0272
		7.54167	63.6787	66.2308
		7.54583	63.1629	69.1946
		7.55	64.0588	74.19
		7.55417	66.8054	72.7104
		7.55833	66.4299	76.2398
		7.5625	65.1403	71.5068
		7.56667	65.5973	71.0362
		7.57083	66.2127	71.1629
		7.575	65.9819	69.8507
		7.57917	68.3077	71.0226
		7.58333	66.7511	69.914
		7.5875	66.724	67.4163
		7.59167	65.1674	69.9819
		7.59583	65.5294	70.5294
		7.6	68.2715	71.1312
		7.60417	65.1312	68.9683
		7.60833	64.9774	71.6697
		7.6125	65.9367	69.6335
		7.61667	65.086	71.0272
		7.62083	65.5339	70.3258
		7.625	64.8778	70.4751
		7.62917	63.7964	67.4525
		7.63333	56.1855	61.5973
		7.6375	51.5792	49.0453
		7.64167	49.1538	48.4072
		7.64583	55.1086	52.9095
		7.65	60.1403	62.371
		7.65417	65.7285	68.3982
		7.65833	64.1086	67.2353
		7.6625	61.0543	68.9864
		7.66667	64.0317	69.819
		7.67083	64.3258	66.8597
		7.675	63.0271	65.9909
		7.67917	63.5204	67.7421
		7.68333	66.0317	65.7511
		7.6875	65.095	67
		7.69167	66.2579	69.2217
		7.69583	64.5792	66.1403
		7.7	63.4253	65.905
		7.70417	66.5113	68.0362
		7.70833	63.2172	66.0815
		7.7125	62.7195	63.8642
		7.71667	62.0724	63.7964
		7.72083	63.8462	67.1041
		7.725	63.5339	69.6652
		7.72917	65.4163	67.4434
		7.73333	62.0543	63.1131
		7.7375	62.724	62.9095
		7.74167	63.8642	55.9955
		7.74583	60.7511	62.1855
		7.75	63.6787	65.905
		7.75417	67.3801	67.4525
		7.75833	65.5475	66.5656
		7.7625	64.2262	68.5249
		7.76667	65.2896	66.8869
		7.77083	61.629	59.3167
		7.775	59.3032	60.1765
		7.77917	62.2805	65.4932
		7.78333	62.5113	65.4253
		7.7875	56.9547	59.3213
		7.79167	55.2127	59.1629
		7.79583	64.81	67.6787
		7.8	60.6787	67.5566
		7.80417	64.8235	69.7376
		7.80833	63.5747	71.0633
		7.8125	68.0452	72.0272
		7.81667	67.9321	74.2217
		7.82083	67.638	76.1312
		7.825	66.6923	69.8778
		7.82917	58.9321	61.2127
		7.83333	60.2715	59.3439
		7.8375	62.4299	69.8959
		7.84167	65.5837	71.4344
		7.84583	68.6471	71.9819
		7.85	70.4072	74.4842
		7.85417	68.1719	73.1719
		7.85833	69.0136	73.6652
		7.8625	68.2398	72.1358
		7.86667	66.2896	73.3801
		7.87083	62.3167	66.5611
		7.875	54.905	59.7828
		7.87917	63.638	67.2805
		7.88333	63.5339	69.4796
		7.8875	66.0045	69.9774
		7.89167	66.0317	73.4796
		7.89583	67.3982	74.1358
		7.9	69.1946	71.1358
		7.90417	69.7195	72.8597
		7.90833	68.4027	72.7466
		7.9125	68.7783	70.819
		7.91667	67.733	75.7421
		7.92083	69.2081	75.4796
		7.925	67.8461	69.7466
		7.92917	59.9819	72.6425
		7.93333	57.8416	64.0633
		7.9375	61.905	68.8009
		7.94167	63.4932	71.4434
		7.94583	64.5611	67.1267
		7.95	64.1539	70.1493
