# Supplementary material for: Kinetics of blood cell differentiation during hematopoiesis revealed by quantitative long-term live imaging
Source: eLife. 2023 Mar 31;12:e84085. doi: 10.7554/eLife.84085 (PMC10065797; doi:10.7554/eLife.84085)
Supplement: Figure 2—source data 1. [file elife-84085-fig2-data1.xlsx]

## Sheet: Figure 2D
		Daughter cell size
		D1	D2
		43.822	38.824
		50.933	42.188
		50.068	49.876
		45.744	45.071
		43.102	48.51
		48.51	44.215
		48.828	36.502
		43.738	41.193
		35.865	41.273
		41.114	45.806

## Sheet: Figure 2E
		Daughter cell JAK-STAT activity
		D1	D2
		29.948	23.814
		26.637	22.638
		25.133	22.117
		49.902	51.145
		35.329	27.674
		24	20.986
		45.269	48.581
		47.734	54.967
		38.717	34.192
		35.317	42.557
