# Supplementary material for: Kinetics of blood cell differentiation during hematopoiesis revealed by quantitative long-term live imaging
Source: eLife. 2023 Mar 31;12:e84085. doi: 10.7554/eLife.84085 (PMC10065797; doi:10.7554/eLife.84085)
Supplement: Figure 3—figure supplement 1—source data 1. [file elife-84085-fig3-figsupp1-data1.xlsx]

## Sheet: Figure 3 figure supplement 1B
			All progenitors		Core progenitors		Distal progenitors				Column E	Size of cells initiating mitosis (distal progenitors)
			Size of cells initiating mitosis	Size of control non-mitotic neighbours	Size of cells initiating mitosis	Size of control non-mitotic neighbours	Size of cells initiating mitosis	Size of control non-mitotic neighbours			vs.	vs.
			82.546	50.498	65.632	44.265	74.285	45.863			Column C	Size of cells initiating mitosis (core progenitors)
			70.538	59.007	71.556	42.268	78.412	45.264
			66.244	43.818	56.646	48.525	75.484	54.516			Unpaired t test with Welch's correction
			80.081	57.575	62.504	49.723	76.149	48.658			P value	0.0111
			61.949	45.17	57.045	36.677					P value summary	*
			70.458	45.806	54.117	34.547					Significantly different? (P < 0.05)	Yes
					79.211	52.386					One- or two-tailed P value?	Two-tailed
											Welch-corrected t, df	t=3.470 df=6.737
											How big is the difference?
											Mean ± SEM of column C	63.82 ± 3.427 N=7
											Mean ± SEM of column E	76.08 ± 0.8670 N=4
											Difference between means	12.27 ± 3.535
											95% confidence interval	3.841 to 20.69
											R square	0.6412
											F test to compare variances
											F,DFn, Dfd	27.34, 6, 3
											P value	0.0206
											P value summary	*
											Significantly different? (P < 0.05)	Yes

## Sheet: Figure 3 figure supplement 1C
				Distance to PSC		Distance to heart tube
				Mean	SD	Mean	SD
			p-axis	67.1255	35.4282	40.1322	20.4282
			z axis	40.5633	28.0529	25.2503	17.1888

## Sheet: Figure 3 figure supplement 1D
			z
		24.683	29.211
		31.664	95.985
		39.225	23.92
		70.649	30.696
		73.371	21.638
		37.751	41.93
		92.654
		90.028
		114.367
		115.058
		38.016
		22.736
		76.509
		51.618
		89.326
		68.136
		16.641
		30.339
		36.308
		42.445
		35.866
		44.437
		23.141
		24.044
		59.896
		18.621
		52.562
		79.764
		114.74
		125.016
		37.303
		124.798
		133.771
		49.646
		134.562
		73.813
		69.148
		21.292
		125.309
		36.595
		15.962
		104.507
		95.001
		79.184
		95.829
		86.574
		79.804
		85.171
		90.736
		84.499
		21.763
		20.809
		26.24
		92.603
		119.54
		106.227
		69.559
		73.421

## Sheet: Figure 3 figure supplement 1E
				z
			43.401	7.619
			45.57	56.682
			48.981	20.15
			50.221	31.439
			59.523	19.092
			44.838	16.52
			39.766
			33.281
			85.168
			85.164
			55.847
			12.411
			72.193
			13.536
			58.103
			63.174
			14.469
			27.611
			33.799
			36.636
			18.465
			32.375
			15.242
			11.094
			30.187
			25.223
			48.06
			44.844
			19.618
			18.605
			17.151
			28.454
			20.918
			29.913
			59.237
			31.322
			23.985
			12.129
			56.967
			18.902
			30.739
			71.065
			41.172
			32.431
			52.734
			45.969
			57.811
			63.738
			74.453
			78.116
			20.306
			31.686
			18.068
			15.228
			63.66
			59.503
			60.354
			24.252

## Sheet: Figure 3 figure supplement 1F
				Wild type_Angle	Percentile	Zscore
			1	72.738	0.0178571	-2.10017
			2	83.738	0.0357143	-1.80274
			3	34.315	0.0535714	-1.61117
			4	57.458	0.0714286	-1.46523
			5	80.09	0.0892857	-1.34517
			6	125.315	0.107143	-1.24187
			7	163.887	0.125	-1.15035
			8	38.493	0.142857	-1.06757
			9	152.264	0.160714	-0.991526
			10	11.726	0.178571	-0.920823
			11	67.025	0.196429	-0.854447
			12	159.693	0.214286	-0.791639
			13	35.766	0.232143	-0.731808
			14	169.237	0.25	-0.67449
			15	133.96	0.267857	-0.619307
			16	38.949	0.285714	-0.565949
			17	113.707	0.303571	-0.514156
			18	127.702	0.321429	-0.463708
			19	44.079	0.339286	-0.414413
			20	52.069	0.357143	-0.366106
			21	70.496	0.375	-0.318639
			22	132.34	0.392857	-0.27188
			23	126.522	0.410714	-0.225708
			24	103.523	0.428571	-0.180012
			25	77.407	0.446429	-0.13469
			26	53.409	0.464286	-0.0896424
			27	28.041	0.482143	-0.0447762
			28	42.332	0.5	0
			29	85.675	0.517857	0.0447762
			30	9.06	0.535714	0.0896424
			31	146.205	0.553571	0.13469
			32	156.942	0.571429	0.180012
			33	22.891	0.589286	0.225708
			34	49.635	0.607143	0.27188
			35	87.996	0.625	0.318639
			36	69.043	0.642857	0.366106
			37	90.687	0.660714	0.414413
			38	67.799	0.678571	0.463708
			39	144.481	0.696429	0.514156
			40	104.512	0.714286	0.565949
			41	59.49	0.732143	0.619307
			42	86.994	0.75	0.67449
			43	100.675	0.767857	0.731808
			44	143.261	0.785714	0.791639
			45	164.87	0.803571	0.854447
			46	70.305	0.821429	0.920823
			47	169.318	0.839286	0.991526
			48	171.359	0.857143	1.06757
			49	20.535	0.875	1.15035
			50	65.847	0.892857	1.24187
			51	140.617	0.910714	1.34517
			52	155.158	0.928571	1.46523
			53	131.701	0.946429	1.61117
			54	147.021	0.964286	1.80274
			55	134.631	0.982143	2.10017
			56	25.128	1

## Sheet: Figure 3 figure supplement 1G
			Infectio_Angle	Percentile	Z score
		1	81.95	0.0666667	-1.50109
		2	36.661	0.133333	-1.11077
		3	73.188	0.2	-0.841621
		4	127.117	0.266667	-0.622926
		5	143.618	0.333333	-0.430727
		6	138.856	0.4	-0.253347
		7	178.55	0.466667	-0.0836517
		8	26.801	0.533333	0.0836517
		9	29.914	0.6	0.253347
		10	46.425	0.666667	0.430727
		11	30.581	0.733333	0.622926
		12	128.302	0.8	0.841621
		13	73.009	0.866667	1.11077
		14	177.09	0.933333	1.50109
		15	62.598	1
