# Supplementary material for: Kinetics of blood cell differentiation during hematopoiesis revealed by quantitative long-term live imaging
Source: eLife. 2023 Mar 31;12:e84085. doi: 10.7554/eLife.84085 (PMC10065797; doi:10.7554/eLife.84085)
Supplement: Figure 3—source data 1. [file elife-84085-fig3-data1.xlsx]

## Sheet: Figure 3B
		Mitosis duration (min)
		58
		42.5
		61.75
		59.75
		81
		45.25
		68.75
		67
		65.25
		48.5
		73.75
		58.75
		70.25
		71.75
		90
		97.5
		90
		73
		70.5
		67.75
		63.5
		71.75
		123.25
		135.5
		56.75
		67.75
		68.5
		107
		57
		56
		44.25
		53.75
		178.75
		47.33
		33.83
		33.83
		35.33
		38.83
		30.17
		56.5
		47.17
		62.17
		28.33
		64
		18.83
		32
		36.67
		30.83
		38.33
		39.67
		39.67
		35.33
		38.33
		47
		36.83
		38.17
		39.67
		56
		42.67
		56
		31
		35.33
		23.5

## Sheet: Figure 3C
		Cell size before and after mitosis
		0hr Before	3hr After
		81.512	102.029
		72.844	94.952
		59.245	75.309
		68.47	85.329
		69.186	76.025
		65.925	71.651
		76.979	91.612
		73.719	95.508
		60.995	70.458
		57.372	66.213
		74.478	83.799
		89.277	104.749
		86.874	93.794

## Sheet: Figure 3D
		Time (min)	Parent	Progeny 1	Progeny 2
		0	76.582
		7	90.737
		13	81.194
		20	85.727
		27	83.182
		33	87.476
		40	86.363
		47	80.876
		53	80.399
		60	87.476
		67		39.126	45.726
		73		38.887	51.929
		80		36.342	51.452
		87		42.863	50.418
		93		43.022	50.418
		100		39.205	48.748
		107		42.784	52.327
		113		38.808	50.259
		120		42.704	52.565
		127		41.671	50.418
		133		45.011	54.076
		140		43.341	49.146
		147		44.136	48.589
		153		44.454	50.816
		160		42.943	52.565
		167		46.442	51.293
		173		48.112	56.701
		180		43.5	53.838
		187		46.203	54.633
		193		46.522	58.609
		200		45.408	54.951
		207		46.681	51.054
		213		46.76	53.812
		220		48.748	59.245
		227		50.498	58.45
		233		46.84	59.484

## Sheet: Figure 3I
		Mitosis duration (min)
		z	
		71.75	58			Column B	
		90	42.5			vs.	vs.
		68.5	61.75			Column A	z
		107	59.75
		57	81			Mann Whitney test
		56	45.25			P value	0.0225
			68.75			Exact or approximate P value?	Exact
			67			P value summary	*
			65.25			Significantly different? (P < 0.05)	Yes
			48.5			One- or two-tailed P value?	Two-tailed
			73.75			Sum of ranks in column A,B	274.0 , 1556
			58.75			Mann-Whitney U	71
			70.25
			90			Difference between medians
			97.5			Median of column A	70.13
			73			Median of column B	47.92
			70.5			Difference: Actual	-22.21
			67.75			Difference: Hodges-Lehmann	-22.17
			63.5
			71.75
			123.25
			135.5
			56.75
			67.75
			47.33
			33.83
			33.83
			35.33
			38.83
			30.17
			56.5
			47.17
			62.17
			28.33
			64
			18.83
			32
			36.67
			30.83
			38.33
			39.67
			39.67
			35.33
			38.33
			47
			36.83
			38.17
			39.67
			56
			42.67
			56
			31
			35.33
			23.5

## Sheet: Figure 3J
		0.89
	z	0.11
