# Supplementary material for: Kinetics of blood cell differentiation during hematopoiesis revealed by quantitative long-term live imaging
Source: eLife. 2023 Mar 31;12:e84085. doi: 10.7554/eLife.84085 (PMC10065797; doi:10.7554/eLife.84085)
Supplement: Figure 4—figure supplement 1—source data 1. [file elife-84085-fig4-figsupp1-data1.xlsx]

## Sheet: Figure 4 figure supplement 1C
		Wt	Inf			Unpaired t test with Welch's correction
		0.019	0.007			P value	0.023
		0.015	0.008			P value summary	*
		0.043	0.019			Significantly different? (P < 0.05)	Yes
		0.037	0.027			One- or two-tailed P value?	Two-tailed
		0.023	0.012			Welch-corrected t, df	t=2.447 df=21.60
		0.032	0.009
		0.023	0.015			How big is the difference?
		0.025	0.028			Mean ± SEM of column A	0.02343 ± 0.002552 N=14
		0.018	0.025			Mean ± SEM of column B	0.0140 ± 0.002886 N=11
		0.011	0.001			Difference between means	-0.009429 ± 0.003852
		0.028	0.003			95% confidence interval	-0.01743 to -0.001431
		0.028				R square	0.2171
		0.011
		0.015

## Sheet: Figure 4 figure supplement 1D
		Wt	Inf			Unpaired t test with Welch's correction
		0.008	0.008			P value	0.9355
		0.007	0.011			P value summary	ns
		0	0.019			Significantly different? (P < 0.05)	No
		0.009	0.024			One- or two-tailed P value?	Two-tailed
		0.011	0.014			Welch-corrected t, df	t=0.08191 df=21.32
		0.026	0.031
		0.007	0.012			How big is the difference?
		0.02	0.007			Mean ± SEM of column A	0.01357 ± 0.002690 N=14
		0.004	0.027			Mean ± SEM of column B	0.01391 ± 0.003123 N=11
		0.002	0			Difference between means	0.0003377 ± 0.004122
		0.033	0			95% confidence interval	-0.008227 to 0.008902
		0.025				R square	0.0003146
		0.019
		0.019
