# Supplementary material for: Kinetics of blood cell differentiation during hematopoiesis revealed by quantitative long-term live imaging
Source: eLife. 2023 Mar 31;12:e84085. doi: 10.7554/eLife.84085 (PMC10065797; doi:10.7554/eLife.84085)
Supplement: Figure 4—source data 1. [file elife-84085-fig4-data1.xlsx]

## Sheet: Figure 4C
	Wt	Inf			Column B	Inf
	144	104			vs.	vs.
	112	112			Column A	Wt
	187	187
	148	141			Mann Whitney test
	148	45			P value	0.032
	144	58			Exact or approximate P value?	Exact
	77	50			P value summary	*
	94	86			Significantly different? (P < 0.05)	Yes
	81	98			One- or two-tailed P value?	Two-tailed
	131	96			Sum of ranks in column A,B	252.5 , 212.5
	222	138			Mann-Whitney U	59.5
	104	36
	77	24			Difference between medians
		30			Median of column A	131
		42			Median of column B	96
		143			Difference: Actual	-35
		115			Difference: Hodges-Lehmann	-41

## Sheet: Figure 4D
	Wt	Inf			Column B	Inf
	38	68			vs.	vs.
	22	55			Column A	Wt
	15	36
	29	29			Mann Whitney test
	35	44			P value	0.336
	22	12			Exact or approximate P value?	Exact
	52	12			P value summary	ns
		38			Significantly different? (P < 0.05)	No
		56			One- or two-tailed P value?	Two-tailed
					Sum of ranks in column A,B	50.00 , 86.00
					Mann-Whitney U	22
					Difference between medians
					Median of column A	29
					Median of column B	38
					Difference: Actual	9
					Difference: Hodges-Lehmann	9

## Sheet: Figure 4E
	Wt	Inf			Column B	Inf
	184	87			vs.	vs.
	133	66			Column A	Wt
	189	170
	111	193			Mann Whitney test
	205	122			P value	0.3465
	193	98			Exact or approximate P value?	Exact
	192	54			P value summary	ns
	142	215			Significantly different? (P < 0.05)	No
	150	326			One- or two-tailed P value?	Two-tailed
	231	220			Sum of ranks in column A,B	224.5 , 240.5
	292	191			Mann-Whitney U	87.5
	155	323
	208	182			Difference between medians
		74			Median of column A	189
		95			Median of column B	170
		278			Difference: Actual	-19
		128			Difference: Hodges-Lehmann	-22

## Sheet: Figure 4F
	Wt	Inf			Column B	Inf
	1603	1985			vs.	vs.
	1429	2022			Column A	Wt
	865	2301
	789	2809			Mann Whitney test
	1704	1776			P value	0.0872
	1626	1488			Exact or approximate P value?	Exact
	1803	2120			P value summary	ns
	1892	1790			Significantly different? (P < 0.05)	No
	1767	1639			One- or two-tailed P value?	Two-tailed
	1790	1097			Sum of ranks in column A,B	150.5 , 174.5
	1253	1090			Mann-Whitney U	45.5
	1515
	1666				Difference between medians
	1555				Median of column A	1615
					Median of column B	1790
					Difference: Actual	175.5
					Difference: Hodges-Lehmann	268

## Sheet: Figure 4G
			 axis	z axis
		Wt	89	11
		Inf	100	0

## Sheet: Figure 4H
	Wt	Inf			Column B	Inf
	0.543431	0.175143			vs.	vs.
	0.749757	0.175143			Column A	Wt
	1.2101	0.152129
	1.25118	0.71682			Mann Whitney test
	0.470069	0.860184			P value	0.0397
	0.287745	0.136477			Exact or approximate P value?	Exact
	0.382148				P value summary	*
	2.13419				Significantly different? (P < 0.05)	Yes
	0.980513				One- or two-tailed P value?	Two-tailed
	0.61282				Sum of ranks in column A,B	104.0 , 32.00
					Mann-Whitney U	11
					Difference between medians
					Median of column A	0.6813
					Median of column B	0.1751
					Difference: Actual	-0.5061
					Difference: Hodges-Lehmann	-0.3912

## Sheet: Figure 4I
		Mitosis duration (s)
		Wt	Inf			Column B	Inf
		3480	2205			vs.	vs.
		2550	2265			Column A	Wt
		3705	7410
		3585	2610			Mann Whitney test
		4860	2745			P value	0.1365
		2715	5235			Exact or approximate P value?	Exact
		4125	5535			P value summary	ns
		4020	4230			Significantly different? (P < 0.05)	No
		3915	3675			One- or two-tailed P value?	Two-tailed
		2910	2700			Sum of ranks in column A,B	2371 , 710.5
		4425	3555			Mann-Whitney U	354.5
		3525	2940
		4215	4965			Difference between medians
		4305	4065			Median of column A	3360
		5400	5445			Median of column B	3675
		5850				Difference: Actual	315
		5400				Difference: Hodges-Lehmann	560
		4380
		4230
		4065
		3810
		4305
		7395
		8130
		3405
		4065
		4110
		6420
		3420
		3360
		2655
		3225
		10725
		2840
		2030
		2030
		2120
		2330
		1810
		3390
		2830
		3730
		1700
		3840
		1130
		1920
		2200
		1850
		2300
		2380
		2380
		2120
		2300
		2820
		2210
		2290
		2380
		3360
		2560
		3360
		1860
		2120
		1410

## Sheet: Figure 4L
		Wt_Speed	Wt_Angle	Infection_Speed	Infection_Angle
		3480	87.996	2205	81.95
		2550	132.34	2265	36.661
		3705	67.799	7410	62.598
		3585	90.687	2610	73.188
		4860	155.158	2745	143.618
		2715	77.407	5235	128.302
		4125	70.305	5535	177.09
		4020	100.675	4230	46.425
		3915	86.994	3675	26.801
		2910	85.675	2700	127.117
		4425	140.617	3555	178.55
		3525	69.043	2940	138.856
		4215	169.318	4965	30.581
		5400	131.701	4065	29.914
		5850	147.021	5445	73.009
		4380	65.847
		4230	171.359
		4065	164.87
		3810	104.512
		4305	20.535
		7395	134.631
		8130	25.128
		3405	49.635
		4065	143.261
		2655	103.523
		3225	9.06
		10725	126.259
		2840	42.332
		2030	38.493
		2030	152.264
		2120	11.726
		2330	127.702
		1810	57.458
		3390	22.891
		2830	28.041
		3730	144.481
		1700	34.315
		3840	59.49
		1130	72.738
		1920	163.887
		2200	35.766
		1850	80.09
		2300	113.707
		2380	70.496
		2380	52.069
		2120	67.025
		2300	38.949
		2820	53.409
		2210	169.237
		2290	133.96
		2380	44.079
		3360	156.942
		2560	126.522
		3360	146.205
		1860	125.315
		2120	159.693
		1410	83.738

## Sheet: Figure 4M
		0-60		60-90		90-120				Column B	Inf (0-60)			Column D	Inf (60-90)			Column F	Inf (90-120)
		Wt	Inf	Wt	Inf	Wt	Inf			vs.	vs.			vs.	vs.			vs.	vs.
		3225	3675	4380	7410	1860	2700			Column A	Wt (0-60)			Column C	Wt (60-90)			Column E	Wt (90-120)
		2120	4065	2120	5445	10725	5235
		4305	4965	3705	2610	2560	2940			Mann Whitney test				Mann Whitney test				Mann Whitney test
		3390	2265	3525	2205	2330	2745			P value	0.0824			P value	0.4342			P value	0.6331
		8130	4230	4125		5400	5535			Exact or approximate P value?	Exact			Exact or approximate P value?	Exact			Exact or approximate P value?	Exact
		2830		2380		2550	3555			P value summary	ns			P value summary	ns			P value summary	ns
		1700		1130		2290				Significantly different? (P < 0.05)	No			Significantly different? (P < 0.05)	No			Significantly different? (P < 0.05)	No
		2200		2715		7395				One- or two-tailed P value?	Two-tailed			One- or two-tailed P value?	Two-tailed			One- or two-tailed P value?	Two-tailed
		2030		1850		4425				Sum of ranks in column A,B	173.0 , 80.00			Sum of ranks in column C,D	197.0 , 56.00			Sum of ranks in column E,F	310.0 , 96.00
		2300		1410		4065				Mann-Whitney U	20			Mann-Whitney U	26			Mann-Whitney U	57
		2840		2910		3730
		2380		3915		3360				Difference between medians				Difference between medians				Difference between medians
		3405		3480		5850				Median of column A	2820			Median of column C	3195			Median of column E	3545
		2380		3585		2030				Median of column B	4065			Median of column D	4028			Median of column F	3248
		2820		4020		4860				Difference: Actual	1245			Difference: Actual	832.5			Difference: Actual	-297.5
		1810		2655		3360				Difference: Hodges-Lehmann	1235			Difference: Hodges-Lehmann	1260			Difference: Hodges-Lehmann	377.5
		3840		3810		2120
				2300		1920
						4065
						2210
						4215
						4230
