# Supplementary material for: Kinetics of blood cell differentiation during hematopoiesis revealed by quantitative long-term live imaging
Source: eLife. 2023 Mar 31;12:e84085. doi: 10.7554/eLife.84085 (PMC10065797; doi:10.7554/eLife.84085)
Supplement: Figure 5—source data 1. [file elife-84085-fig5-data1.xlsx]

## Sheet: Figure 5B
		eater-dsRed	dome-MESO-GFP
		15.424	79.797
		13.808	86.017
		14.966	82.91
		18.582	81.345
		13.068	79.655
		15.904	85.237
		13.565	81.559
		15.22	85.469
		14.096	81.514
		13.26	84.226
		15.011	85.921
		15.288	86.712
		14.723	82.068
		14.407	81.209
		16.819	84.819
		13.441	87.847
		12.876	88.78
		16.655	88.503
		15.492	83.701
		16.079	83.689
		18.271	83.571
		16.797	82.113
		13.181	85.305
		14.311	84.627
		15.52	84.203
		14.661	87.853
		16.78	86.898
		15.107	86.09
		14.819	83.232
		14.243	84.073
		17.158	84.503
		14.379	81.367
		14.497	86.068
		15.158	83.605
		16.525	85.853
		13.056	84.158
		15.198	89.209
		13.842	85.158
		16.339	81.322
		17.915	86.136
		16.085	83.989
		12.96	89.209
		13.113	84.814
		14.514	84.203
		14.802	83.339
		14.785	87.395
		19.881	87.706
		16.339	83.384
		13.915	81.802
		15.119	80.678
		10.876	82.791
		15.78	82.508
		15.429	87.04
		14.785	84.859
		16.621	83.311
		14.294	85.085
		13.972	85.492
		15.938	85.169
		14.944	87.266
		16.74	88.853
		16.424	85.802
		16.994	88.073
		15.898	84.102
		14.678	84.989
		15.328	84.418
		13	84.542
		14.65	84.531
		15.085	83.141
		16.147	82.887
		16.972	81.763
		13.814	81.232
		15.944	84.232
		14.814	80.345
		17.051	83.842
		16.073	84.311
		13.621	83.87
		12.616	86.328
		11.78	84.831
		13.288	87.395
		10.339	83.09
		15.441	81.859
		14.463	80.164
		13.678	80.316
		14.785	80.277
		12.627	77.763
		13.554	79.842
		13.655	76.802
		12.91	77.91
		10.712	80.48
		11.446	76.232
		13.203	78.441
		12.277	81.169
		13.836	75.729
		14.503	79.96
		12.616	79.384
		13.944	83.633
		14.412	83.831
		15.531	80.689
		14.785	75.35
		12.96	77.017
		15.847	78.797
		14.972	76.915
		9.74	74.266
		10.322	75.887
		13.452	74.085
		12.74	74.39
		11.469	70.102
		12.915	67.356
		12.836	62.559
		11.616	66.215
		11.023	67.915
		12.605	71.559
		12.192	71.463
		12.593	67.667
		9.605	69.068
		10.757	70.215
		9.825	67.186
		13.124	68.254
		10.446	70.373
		10.452	67.249
		10.011	69.797
		9.107	64.932
		11.198	62.842
		10.706	58.864
		9.661	54.927
		7.887	54.723
		9.435	53.345
		11.034	52.435
		8.548	53.582
		10.316	54.588
		9.056	56.175
		10.056	54.593
		10.124	59.729
		11.582	59.593
		11.192	58.655
		10.034	62.073
		9.203	60.61
		12	62.215
		9.158	54.017
		7.497	50.062
		8.791	46.26
		9.164	40.61
		6.616	43.983
		8.328	40.91
		9.475	42.571
		8.983	42.723
		9.746	44.249
		10.825	43.751
		8.452	43.469
		7.825	40.316
		9.062	42.056
		7.379	43.441
		9.588	38.469
		7.644	39.051
		8.548	35.904
		9	34.379
		6.96	32.418
		8.537	30.887
		10.006	32.452
		8.068	30.085
		9.181	32.972
		9.113	34.48
		8.503	34.226
		7.379	34.763
		9.141	36.734
		8.282	39.774
		7.328	40.983
		8.706	38.701
		10.294	37.463
		7.232	33.593
		6.441	30.542
		8.124	29.124
		7.768	30.627
		6.751	28.316
		7.87	28.814
		8.588	29.011
		7.915	30.39
		6.616	30.927
		8.424	29.661
		8.723	28.158
		9.661	28.627
		8.305	29.429
		9.949	29.401
		10.712	30.887
		7.61	26.831
		8.938	25.825
		7.898	24.04
		8.893	24.734
		9.633	22.644
		10.571	20.034
		8.808	21.644
		8.435	23.39
		11.198	26.469
		10.215	28.006
		11.096	25.876
		10.011	24.712
		10.887	28.062
		9.938	26.164
		12.277	26.475
		10.175	25.655
		11.192	23.051
		10.78	23.412
		11.429	22.695
		8.655	21.384
		8.051	19.972
		8.853	17.379
		7.508	18.102
		8.062	20.672
		7.706	19.78
		11.469	21.435
		9.023	20.559
		8.898	21.147
		9.847	20.627
		9.678	22.48
		11.797	19.757
		9.684	19.927
		11.706	20.475
		13.531	21.203
		16.463	21.814
		12.644	21.65
		14.203	22.401
		13.52	23.785
		12.322	22.22
		12.802	21.322
		16.062	21.35
		16.486	23.328
		13.96	24.492
		14.797	22.056
		14.831	23.107
		14.565	23.91
		12.486	25.051
		14.356	24.26
		13.192	26.746
		15.079	23.915
		14.52	25.966
		15.412	28.011
		15.424	24.492
		18.757	23.616
		13.582	25.401
		15.638	25.949
		16.847	22.898
		17.113	23.435
		16.113	24.983
		16.932	25.729
		14.825	25.175
		15.644	25.819
		13.475	26.198
		14.011	25.684
		15.831	24.887
		13.808	27.243
		16.797	28.734
		16.825	28.192
		20.051	29.627
		18.972	31.78
		20.893	29.525
		17.379	27.508
		20.96	28.051
		21.237	28.412
		21.757	26.311
		20.847	26.463
		20.621	24.751
		20.435	27.554
		17.243	25.508
		21.87	27.582
		18.864	27.847
		18.282	27.989
		21.638	29.328
		20.898	27.559
		19.938	25.401
		21.96	27.565
		20.616	26.384
		18.232	27.22
		17.373	25.158
		19.847	25.825
		22.305	27.384
		20.028	25.226
		18.52	26.633
		22.158	26.977
		22.588	28.915
		17.429	22.949
		19.232	21.944
		21.825	22.412
		19.695	25.768
		16.13	22.972
		18.113	23.701
		19.633	24.294
		18.294	22.497
		17.452	24.593
		17.616	22.729
		20.333	23.531
		19.87	25.582
		22.04	25.593
		23.859	27.932
		25.678	29.056
		24.723	27.87
		22.469	26.938
		25.023	27.503
		26.492	29.328
		23.814	29.339
		25.949	28.655
		25.605	30.311
		24.559	30.48
		26.497	31.034
		24.808	31.062
		29.147	32.497
		27.011	31.153
		27.322	32.746
		26.158	32.124
		29.339	32.119
		26.983	30.288
		25.582	32.938
		28.774	31.169
		28.949	32.164
		28.876	31.605
		25.983	31.932
		27.542	31.537
		25.616	32.78
		27.915	30.311
		24.859	30.864
		27.175	31.718
		28.073	31.814
		25.458	33.571
		28.588	32.079
		26.429	32.345
		26.977	30.91
		23.836	28.124
		26.915	32.102
		26.175	32.288
		28.853	28.966
		22.955	31.006
		24.503	27.023
		24.689	29.819
		24.192	27.621
		25	26.944
		24.989	26.407
		22.746	26.282
		24.503	27.876
		22.209	26.932
		20.322	27.254
		25.299	27.695
		25.186	26.288
		24.718	26.893
		26.853	28.938
		23.729	27.023
		26.271	27.441
		27.085	29.232
		24.864	27.944
		25.819	28.802
		23.701	28.65
		24.695	28.011
		24.972	29.757
		24.35	29.373
		25.876	26.164
		22.966	29.215
		26.09	29.836
		29.65	27.87
		24.554	28.311
		25.073	29.746
		23.48	26.113
		24.277	25.486
		22.463	26.023
		23.655	25.559
		24.52	28.802
		22.893	26.565
		24.588	26.028
		24.282	27.718
		27.175	28.158
		25.254	25.763
		23.915	29.395
		27.209	27.277
		23.701	28.977
		27.689	30.994
		24.514	30.932
		32.249	32.441
		26.508	30.136
		30.062	29.22
		30.339	30.966
		25.593	27.977
		30.045	27.26
		24.684	28.102
		26.503	29.633
		23.904	28.718
		29.486	30.006
		27.13	29.141
		24.452	29.299
		27.017	27.893
		25.288	27.542
		26.757	28.621
		26.616	27.006
		23.085	27
		26.311	26.678
		24.333	26.181
		21.277	28.282
		25.706	25.237
		22.237	27.944
		24.215	26.938
		24.299	26.424
		26.633	27.322
		22.169	26.198
		21.921	26.836
		20.763	24.734
		19.695	24.124
		21.797	24.554
		17.678	23.819
		22.458	25.028
		20.249	22.22
		19.226	24.582
		22.898	23.39
		21.096	22.96
		18.819	23.288
		24.22	21.616
		21.525	22.379
		20.74	24.266
		24.107	21.107
		23.266	25.689
		22.316	23.633
		27.085	23.407
		18.621	25.215
		25.023	23.435
		22.661	24.124
		26.328	25.051
		24.384	26.271
		20.633	26.085
		21.785	23.35
		19.678	22.616
		22.446	21.243
		16.774	21.785
		22.294	20.147
		22.74	23.09
		18.571	20.814
		15.96	22.356
		16.537	18.52
		16.062	20.186
		19.288	19.379
		21.542	20.605
		18.475	17.989
		17.028	19.684
		14.429	18.079
		16.853	20.785
		19.424	20.537
		20.78	19.932
		18.898	20.452
		21.712	19.661
		18.864	20.655
		19.045	19.684
		19.763	21.299
		15.605	18.605
		14.768	17.198
		15.915	17.441
		10.429	15.627
		15.017	17.712
		12.531	17.486
		15.04	16.559
		14.469	18.277
		14.147	16.633
		15.237	16.367
		14.593	17.729
		20.034	17.384
		18.226	20.062
		16.367	20.475
		17.701	17.249
		16.113	17.452
		17.915	21.418
		17.006	20.831
		15.78	18.525
		15.65	18.04
		13.915	19.542
		18.751	20.056
		22.65	19.751
		21.864	21
		18.605	21.356
		18.791	23.198
		24.452	23.215
		21.712	23.785
		19.22	23.605
		21.729	22.797
		21.763	22.791
		23.672	23.384
		17.04	23.124
		20.881	21.729
		20.418	19.441
		22.13	20.638
		18.91	18.966
		19.672	19.74
		17.542	20.294
		21.226	20.825
		19.706	18.384
		19.565	19.379
		20.633	18.446
		16.836	19.734
		16.028	21.395
		19.09	21.605
		17.718	20.588
		13.644	18.757
		17.898	18.424
		15.266	17.944
		15.994	18.802
		16.401	19.045
		19.525	18.379
		19.486	19.893
		17.944	21.565
		19.689	22.757
		20.887	20.904
		19.593	20.249
		20.689	22.13
		19.028	22.395
		19.768	21.853
		17.469	21.859
		18.571	20.825
		16.266	22.497
		19.469	22.023
		20.136	21.034
		17.729	21.644
		16.723	21.141
		18.028	23.192
		19.768	21.644
		18.525	20.429
		21.339	24.096
		20.96	21.712
		18.667	21.678
		20.825	20.994
		21.085	20.04
		21.412	21.39
		21.266	21.051
		22.949	23.164
		21.243	22.599
		22.073	24.915
		22.661	21.435
		16.508	23.898
		24.034	22.203
		22.322	22.627
		21.158	22.712
		19.881	23.373
		23.384	23.13
		20.311	23.119
		24.056	22.028
		19.554	19.599
		20.096	18.418
		19.955	20.842
		17.288	20.311
		17.655	18.006
		20.006	19.836
		21.09	22.169
		24.13	21.006
		21.678	23.373
		20.107	22.621
		22.113	22.78
		24.514	24.763
		23.028	25.667
		26.232	23.932
		27.571	27
		24.316	27.876
		25.621	25.853
		25.311	27.966
		25.944	24.305
		26.102	24.927
		25.311	25.294
		26.203	27.051
		24.734	26.249
		25	25.497
		24.164	25.836
		28.345	25.401
		21.271	26.842
		22.655	26.932
		20.282	24.497
		26.757	23.537
		24.503	25.791
		27.271	25.006
		25.52	23.316
		21.729	23.497
		21.966	24.734
		24.915	27.203
		23.237	26.124
		25.073	24.96
		29.791	27.062
		27.175	24.441
		23.525	25.831
		25.226	25.616
		23.915	24.825
		22.655	23.136
		30.791	24.254
		25.503	24.842
		28.096	26.627
		28.723	26.814
		22.554	28.028
		22.537	25.91
		24.316	23.977
		22.339	26.073
		30.073	25.932
		24.249	27.921
		24.232	24.966
		24.068	27.678
		27.678	28.751
		27.531	28.825
		24.955	27.537
		23.559	27.322
		26.989	27.04
		27.944	27.825
		26.062	26.915
		22.215	25.582
		21.768	25.944
		25.616	26.373
		24.136	27.294
		29.452	27.124
		25.215	26.757
		24.531	25.644
		23.723	25.927
		21.198	25.254
		24.085	24.672
		23.644	26.237
		25.333	27.65
		25.232	26.232
		27.514	25.113
		27.412	23.78
		19.475	25.938
		22.972	23.554
		24.051	22.418
		24.689	22.379
		25.475	24.051
		21.136	22.797
		21.701	22.407
		18.644	23.153
		21.887	21.757
		18.079	22.107
		22.367	22.96
		21.678	24.802
		20.74	23.678
		23.791	23.537
		21.271	23.644
		27.983	24.678
		25.718	26.514
		25.904	25.441
		24.932	24.48
		27.068	22.667
		24.503	25.305
		26.215	24.09
		23.582	26.887
		23.655	26.565
		23.045	25.599
		24.429	23.876
		26.446	26.198
		28.876	24.384
		32.441	26.441
		30.181	28.023
		24.983	24.395
		24.565	26.294
		26.859	26.384
		27.446	24.802
		27.627	26.266
		26.181	24.91
		22.678	24.045
		27.333	25.028
		24.593	23.362
		24.379	24.26
		19.842	22.113
		15.475	21.356
		21.469	20.469
		24.35	23.661
		23.96	21.65
		27	23.079
		26.446	24.605
		25.373	24.198
		23.768	24.633
		23.119	24.288
		24.35	24.373
		25.181	22.102
		21.147	22.028
		24.107	22.023
		21.429	21.955
		20.797	20.983
		22.531	22.655
		21.983	21.107
		21.147	22.452
		20.147	20.78
		21.215	19.898
		22.627	21.52
		22.774	19.497
		23.678	19.621
		22.475	23.322
		19.966	23.175
		22.113	23.588
		22.966	22.203
		27.52	23.379
		24.062	23.475
		21.734	22.723
		23.554	23.26
		23.531	23.898
		23.079	21.96
		22.712	23.463
		23.898	25.65
		24.78	27.712
		23.616	27.277
		26.181	25.927
		26.418	25.655
		26.542	23.633
		26.345	27.599
		27.435	24.09
		22.254	27.073
		26.672	24.345
		23.667	26.22
		22.734	25.514
		29.079	25.124
		24.266	24.599
		25.254	25.288
		31.198	24.655
		21.593	23.678
		24.61	24.107
		22.65	24.26
		27.542	25.565
		25.452	24.825
		27.576	24.367
		25.085	24.825
		25.119	25.237
		27.65	26.158
		23.746	27.079
		26.582	28.503
		25.87	27.751
		27.508	25.864
		25.977	24.458
		26.627	26.927
		26.712	24.045
		27.35	27.61
		23.633	24.503
		24.209	24.904
		28.458	25.785
		28.124	27.525
		27.508	25.718
		26.927	26.819
		27.836	27.847
		26.723	26.836
		29.994	27.565
		28.169	27.966
		29.316	26.887
		26.045	27.102
		24.904	29.045
		32.35	28.48
		27.141	28.972
		28.333	28.921
		29.288	28.684
		25.181	28.249
		28.311	27.684
		31.605	28.339
		26.927	27.565
		26.74	27.729
		29.554	28.785
		28.644	28.266
		24.661	28.576
		30.599	28.689
		28.04	30.915
		32.079	31.04
		29.876	30.356
		34.853	29.672
		31.831	29.26
		31.136	32.379
		26.859	29.893
		32.271	32.023
		27.616	28.452
		28.192	29.718
		29.599	31.04
		30.209	29.797
		30.384	31.887
		29.853	29.508
		30.774	27.96
		34.407	28.706
		26.605	29.09
		30.158	28.401
		31.932	30.52
		28.678	29.446
		28.418	30.542
		31.169	31.023
		33.311	29.944
		31.876	31.22
		30.079	29.316
		30.333	29.955
		32.379	29.74
		32	33.198
		32.859	30.203
		33.051	31.78
		32.215	32.395
		29.446	29.859
		27.508	26.328
		36.068	28.831
		29.424	30.373
		28.729	29.757
		27.119	30.429
		31.446	32.39
		31.085	31.271
		27.441	30.056
		28.977	31.023
		29.588	27.684
		29.407	30.701
		31.068	29.158
		31.927	28.616
		30.893	30.249
		28.056	27.508
		28.164	27.814
		31.09	30.04
		30.226	27.955
		30.26	29.887
		26.972	30.983
		29.706	29.819
		27.164	30.927
		30.825	30.322
		30.48	31.678
		30.113	30.384
		27.712	28.593
		31.605	28.418
		23.819	30.119
		30.328	27.599
		27.904	28.915
		29.52	29.582
		29.373	28.441
		26.266	29.181
		28.006	27.311
		34.746	27.814
		28.051	27.853
		29.621	26.288
		23.938	29.966
		28.339	28.842
		27.655	27.062
		26.927	28.045
		27.198	24.508
		25.508	26.91
		25.401	27.379
		25.096	28.379
		25.751	27.887
		29.192	28.096
		26.452	24.972
		28.254	27.028
		25.04	26.859
		27.011	27.712
		27.345	28.22
		24.141	27.864
		27.814	27.921
		29.068	28.836
		27.266	29.876
		29.215	26.938
		25.141	30.028
		29.593	28.706
		33.158	29.751
		28.672	27.751
		26.311	29.921
		29.904	28.972
		24.955	29.571
		27.322	27.881
		34.011	26.695
		27.576	27.203
		28.949	28.147
		26.085	27.864
		27.819	28.774
		28.972	26.876
		26.559	28.299
		26.153	25.514
		23.966	24.232
		22.74	25.006
		27.593	25.61
		22.836	24.825
		28.605	25.559
		31.638	26.446
		28.559	26.497
		25.842	26.915
		26.87	26.915
		26.644	26.938
		25.452	24.418
		28.277	25.503
		27.672	25.305
		26.655	27.175
		28.638	25.48
		26.638	25.819
		26.249	28.356
		25.475	25.661
		29.333	28.723
		29.26	28.362
		25.102	27.333
		33.316	27.525
		28.463	28.983
		26.113	29.073
		30.689	27.282
		30.446	27.441
		25.48	27.119
		32.599	24.864
		30.475	27.153
		28.441	26.955
		25.621	24.853
		25.87	24.401
		26.147	26.441
		25.881	25.655
		22.695	25.983
		29.006	26.904
		27.853	30.305
		27.294	26.537
		28.226	26.927
		31.305	27.424
		28.802	27.062
		32.011	29.729
		29.514	25.531
		27.734	26.972
		25.638	25.153
		28.734	28.277
		29.424	26.576
		31.271	26.96
		28.729	26.571
		30.169	27.542
		31.61	27.593
		33.554	28.588
		30.503	29.859
		30.525	30.565
		31.452	27.384
		24.955	27.61
		27.096	24.073
		30.672	24.96
		26.141	25.469
		25.644	27.367
		24.825	25.497
		29.904	26.136
		27.113	25.814
		25.972	26.994
		29.362	27.757
		25.045	24.04
		29.249	27.994
		31.322	23.638
		30.379	28.78
		29.147	26.277
		31.056	28.147
		29.802	26.079
		28.254	27.282
		29.339	28.373
		27.876	28.169
		30.672	26.424
		27.96	28.91
		27.243	27.559
		28.169	27.045
		27.305	27.299

## Sheet: Figure 5C
	Raw intensity		Normalized intensity
	eater-dsRed	dome-MESO-GFP	eater-dsRed	dome-MESO-GFP
	6.537	28.333	0.159587	0.762002
	7.051	31.571	0.173793	0.851497
	4.836	28.113	0.112573	0.755922
	4.864	26.373	0.113347	0.70783
	4.808	28.644	0.111799	0.770598
	5.435	29.706	0.129129	0.79995
	7.39	32.158	0.183162	0.867721
	6.209	21.893	0.150521	0.584008
	5.09	25.723	0.119593	0.689865
	5.616	28.599	0.134131	0.769354
	6.486	26.904	0.158177	0.722506
	5.362	24.164	0.127111	0.646776
	5.412	27.147	0.128493	0.729223
	7.678	30.531	0.191122	0.822752
	7.107	28.096	0.175341	0.755452
	7.034	24.847	0.173323	0.665653
	5.407	31.073	0.128355	0.837733
	6.339	30.599	0.154114	0.824632
	5.797	29.254	0.139134	0.787458
	6.52	32.525	0.159117	0.877864
	6.927	30.542	0.170366	0.823056
	5.186	30.695	0.122246	0.827285
	6.554	33.605	0.160056	0.907714
	6.023	31.13	0.14538	0.839308
	7.198	30.446	0.177856	0.820403
	7.169	33.299	0.177054	0.899257
	5.791	34.616	0.138968	0.935657
	6.056	33.395	0.146292	0.90191
	6.418	33.616	0.156298	0.908018
	7	32.531	0.172383	0.87803
	5.282	33.113	0.1249	0.894116
	6.09	34.531	0.147232	0.933308
	8.915	33.78	0.225312	0.912551
	5.746	33.774	0.137724	0.912385
	7.808	34.672	0.194715	0.937205
	6.339	35.706	0.154114	0.965783
	5.475	33.96	0.130234	0.917526
	6.186	26.921	0.149885	0.722976
	5.412	33.802	0.128493	0.913159
	5.684	33.938	0.136011	0.916918
	6.017	31.565	0.145214	0.851331
	4.424	30.949	0.101186	0.834305
	5.944	32.746	0.143197	0.883972
	7.305	32.407	0.180813	0.874603
	4.898	31.842	0.114287	0.858987
	6.582	34.175	0.16083	0.923468
	6.362	30.751	0.15475	0.828833
	4.65	32.226	0.107432	0.8696
	5.927	33.853	0.142727	0.914568
	5.785	33.977	0.138802	0.917996
	5.39	30.61	0.127885	0.824936
	7.401	31.559	0.183466	0.851165
	6.356	31.079	0.154584	0.837898
	6.729	32.011	0.164893	0.863658
	5.068	26.469	0.118985	0.710483
	4.672	28.87	0.10804	0.776844
	6.271	35.785	0.152235	0.967967
	5.548	33.35	0.132252	0.900666
	7.774	33.311	0.193776	0.899588
	5.921	32.169	0.142561	0.868025
	7.469	31.09	0.185346	0.838202
	6.876	33.249	0.168956	0.897875
	6.52	31.13	0.159117	0.839308
	6.864	32.418	0.168624	0.874907
	5.492	33.701	0.130704	0.910367
	6.746	32.475	0.165363	0.876482
	7.045	35.028	0.173627	0.947044
	6.977	32.994	0.171748	0.890827
	5.672	36.938	0.135679	0.999834
	7.367	35.288	0.182527	0.95423
	5.441	33.299	0.129294	0.899257
	6.068	35.853	0.146624	0.969846
	5.678	33.621	0.135845	0.908156
	6.859	30.706	0.168486	0.827589
	5.475	32.672	0.130234	0.881927
	4.271	31.085	0.096957	0.838064
	5.169	33.944	0.121777	0.917084
	5.068	32.418	0.118985	0.874907
	5.989	33.158	0.14444	0.895359
	6.373	34.486	0.155054	0.932064
	5.989	30.164	0.14444	0.812609
	5.203	30.972	0.122716	0.834941
	5.458	34.966	0.129764	0.94533
	5.921	34.633	0.142561	0.936127
	6.859	34.904	0.168486	0.943617
	6.017	33.695	0.145214	0.910201
	5.831	34.113	0.140074	0.921755
	5.989	35.209	0.14444	0.952047
	6.684	36.757	0.163649	0.994832
	4.87	30.203	0.113513	0.813687
	4.61	33.079	0.106327	0.893176
	7.836	31.582	0.195489	0.851801
	6.842	33.701	0.168016	0.910367
	6.006	33.147	0.14491	0.895055
	4.944	33.497	0.115558	0.904729
	6.74	35.102	0.165197	0.949089
	4.48	27.791	0.102733	0.747022
	5.757	33.74	0.138028	0.911445
	6.475	35.034	0.157873	0.94721
	6.023	32.599	0.14538	0.879909
	5.006	32.497	0.117271	0.87709
	6.452	32.599	0.157237	0.879909
	7.621	34.938	0.189547	0.944557
	6.367	36.944	0.154888	1
	5.944	31.689	0.143197	0.854758
	4.802	31.678	0.111633	0.854454
	4.853	33.605	0.113043	0.907714
	4.588	29.825	0.105718	0.803239
	6.328	33.39	0.15381	0.901772
	4.859	32.52	0.113209	0.877726
	5.023	27.932	0.117741	0.750919
	6.153	33.164	0.148973	0.895525
	7.531	34.734	0.18706	0.938918
	4.989	33.797	0.116802	0.913021
	5.819	32.537	0.139742	0.878196
	4.791	34.288	0.111329	0.926591
	3.853	27.932	0.085404	0.750919
	5.774	27.605	0.138498	0.741881
	6.362	32.429	0.15475	0.875211
	6.175	27.333	0.149581	0.734363
	4.802	33.616	0.111633	0.908018
	5.203	32.588	0.122716	0.879605
	5.944	32.362	0.143197	0.873359
	5.836	33.169	0.140212	0.895663
	4.808	30.232	0.111799	0.814488
	5.904	34.011	0.142091	0.918935
	4.068	31.616	0.091346	0.85274
	6.525	34	0.159255	0.918631
	5.096	31.441	0.119759	0.847904
	5.232	32.068	0.123518	0.865233
	6.831	31.774	0.167712	0.857107
	4.542	29.825	0.104447	0.803239
	5.045	32.814	0.118349	0.885852
	4.774	33.616	0.110859	0.908018
	4.678	29.791	0.108206	0.8023
	4.254	31.808	0.096487	0.858047
	5.266	34	0.124458	0.918631
	4.712	27.689	0.109146	0.744203
	5.492	29.61	0.130704	0.797297
	5.983	34.362	0.144275	0.928637
	4.876	34.853	0.113678	0.942207
	6.695	34.785	0.163953	0.940328
	6.734	32.96	0.165031	0.889887
	6.136	35.424	0.148503	0.957989
	7.825	33.232	0.195185	0.897405
	5.26	32.045	0.124292	0.864597
	5.401	32.158	0.128189	0.867721
	6.305	32.367	0.153174	0.873497
	5.068	31.192	0.118985	0.841022
	4.876	32.508	0.113678	0.877394
	6.718	31.322	0.164589	0.844615
	6.068	28.068	0.146624	0.754678
	5.746	33.203	0.137724	0.896603
	6.379	31.04	0.15522	0.83682
	5.751	28.401	0.137862	0.763882
	7.119	32.904	0.175672	0.888339
	5.565	30.198	0.132722	0.813549
	7.192	27.22	0.17769	0.73124
	7.412	29.249	0.18377	0.787319
	4.718	32.232	0.109312	0.869766
	4.542	31.898	0.104447	0.860535
	4.124	30.198	0.092894	0.813549
	5.593	28.836	0.133495	0.775904
	5.548	35	0.132252	0.94627
	5.87	33.192	0.141151	0.896299
	5.407	31.215	0.128355	0.841657
	5.718	29.955	0.13695	0.806832
	7.051	31.508	0.173793	0.849755
	7.243	33.169	0.1791	0.895663
	5.531	28.537	0.131782	0.76764
	5.763	34.124	0.138194	0.922059
	6.65	31.599	0.16271	0.852271
	4.723	30.525	0.10945	0.822586
	5.136	29.944	0.120865	0.806528
	5.684	32.107	0.136011	0.866311
	5.062	32.011	0.118819	0.863658
	4.802	30.333	0.111633	0.81728
	5.441	32.339	0.129294	0.872723
	4.107	29.695	0.092424	0.799646
	5.311	31.48	0.125701	0.848982
	6.073	30.531	0.146762	0.822752
	7.011	29.655	0.172687	0.798541
	4.684	28.316	0.108372	0.761532
	6.198	30.819	0.150217	0.830712
	4.26	25.955	0.096653	0.696277
	5.853	32.203	0.140682	0.868964
	5.056	31.169	0.118653	0.840386
	5.113	28.949	0.120229	0.779028
	5.333	29.61	0.126309	0.797297
	5.102	30.87	0.119925	0.832122
	7.209	27.893	0.17816	0.749841
	3.949	30.87	0.088057	0.832122
	6.249	29.876	0.151627	0.804649
	5.271	30.983	0.124596	0.835245
	4.819	31.915	0.112103	0.861004
	6.282	30.723	0.152539	0.828059
	7	29.124	0.172383	0.783864
	5.362	25.831	0.127111	0.69285
	6.294	29.079	0.15287	0.782621
	4.627	25.492	0.106796	0.68348
	4.712	29.011	0.109146	0.780741
	5.441	29.768	0.129294	0.801664
	4.701	27.599	0.108842	0.741715
	4.808	33.469	0.111799	0.903955
	6.452	31.333	0.157237	0.844919
	6.508	29.249	0.158785	0.787319
	6.04	29.48	0.14585	0.793704
	6.621	31.78	0.161908	0.857273
	5.548	28.407	0.132252	0.764047
	5.712	29.249	0.136785	0.787319
	4.972	26.638	0.116332	0.715154
	5.718	29.797	0.13695	0.802465
	4.548	27.435	0.104613	0.737182
	5.333	24	0.126309	0.642243
	5.006	28.898	0.117271	0.777618
	4.395	30.757	0.100384	0.828999
	5.282	29.531	0.1249	0.795113
	5.938	28.412	0.143031	0.764186
	4.921	27.034	0.114922	0.726099
	6.068	33.921	0.146624	0.916448
	5.554	30.633	0.132418	0.825571
	5.701	26.339	0.13648	0.70689
	5.113	24.836	0.120229	0.665349
	5.362	29.463	0.127111	0.793234
	3.814	27.441	0.084326	0.737348
	6	30.915	0.144744	0.833366
	5.316	25.469	0.12584	0.682845
	4.514	30.932	0.103673	0.833835
	5.373	31.333	0.127415	0.844919
	4.322	24.023	0.098367	0.642879
	5.136	31.068	0.120865	0.837594
	7.373	29.237	0.182693	0.786988
	4.904	29.593	0.114452	0.796827
	3.842	28.407	0.0851	0.764047
	5.966	30.085	0.143805	0.810425
	6.073	29.757	0.146762	0.80136
	5.311	24.164	0.125701	0.646776
	4.215	26.763	0.095409	0.718609
	4.294	29.599	0.097593	0.796993
	4.876	23.904	0.113678	0.63959
	5.13	26.621	0.120699	0.714685
	5.972	28.124	0.143971	0.756226
	6.859	30.503	0.168486	0.821978
	4.706	30.299	0.10898	0.81634
	4.051	30.429	0.090876	0.819933
	5.525	30.548	0.131616	0.823222
	5.192	29.802	0.122412	0.802604
	5.74	28.904	0.137558	0.777784
	4.384	31.35	0.10008	0.845388
	5.435	29.548	0.129129	0.795583
	4.441	27.565	0.101656	0.740776
	5.017	22.136	0.117576	0.590724
	4.774	30.531	0.110859	0.822752
	6.944	31.542	0.170836	0.850695
	6.023	31	0.14538	0.835715
	4.181	29.294	0.094469	0.788563
	4.243	27.169	0.096183	0.729831
	5.175	29.966	0.121942	0.807136
	6.186	30.678	0.149885	0.826815
	5.13	30.492	0.120699	0.821674
	5.006	30.814	0.117271	0.830574
	4.429	27.825	0.101324	0.747962
	4.271	28.695	0.096957	0.772007
	6.023	32.153	0.14538	0.867582
	4.932	30.768	0.115226	0.829303
	5.141	24	0.121003	0.642243
	4.87	28.74	0.113513	0.773251
	3.644	31.864	0.079627	0.859595
	3.65	27.452	0.079793	0.737652
	4.209	24.26	0.095243	0.649429
	4.147	22.678	0.09353	0.605705
	5.226	28.045	0.123352	0.754042
	5.61	29.633	0.133965	0.797933
	5.644	26.452	0.134905	0.710014
	4.339	27.158	0.098836	0.729527
	5.107	30.684	0.120063	0.826981
	4.915	30.056	0.114756	0.809624
	3.684	28.475	0.080733	0.765927
	4.503	30.079	0.103369	0.81026
	5.565	26.034	0.132722	0.698461
	4.915	28.853	0.114756	0.776374
	4.141	19.712	0.093364	0.523728
	6.424	27.667	0.156463	0.743595
	4.011	26.271	0.089771	0.705011
	4.814	28.401	0.111965	0.763882
	4.898	26.237	0.114287	0.704071
	5.746	27.384	0.137724	0.735773
	3.729	24.927	0.081977	0.667864
	5.362	27.977	0.127111	0.752163
	4.311	31.362	0.098063	0.84572
	5.316	28.068	0.12584	0.754678
	5.192	24.571	0.122412	0.658025
	6.215	28.751	0.150687	0.773555
	6.441	26.571	0.156933	0.713303
	4.514	26.689	0.103673	0.716564
	5.938	22.712	0.143031	0.606644
	4.322	28.305	0.098367	0.761228
	5.514	29.056	0.131312	0.781985
	4.198	30.316	0.094939	0.81681
	4.52	25.458	0.103839	0.682541
	5.119	26.356	0.120395	0.70736
	3.915	23.655	0.087118	0.632708
	4.017	26.949	0.089937	0.72375
	3.836	27.718	0.084934	0.745004
	4.554	26.672	0.104779	0.716094
	7.062	29.243	0.174097	0.787153
	3.678	29.215	0.080567	0.78638
	5.153	27.621	0.121334	0.742323
	4.983	25.124	0.116636	0.673309
	2.927	25.842	0.05981	0.693154
	4.842	30.949	0.112739	0.834305
	5.751	26.384	0.137862	0.708134
	3.955	23.48	0.088223	0.627871
	5.384	24.582	0.127719	0.658329
	4.887	26.695	0.113982	0.71673
	6.48	24.492	0.158011	0.655841
	5.412	29.322	0.128493	0.789337
	6.107	28.424	0.147702	0.764517
	4.243	21.48	0.096183	0.572593
	4.362	21.356	0.099472	0.569166
	5.119	28.582	0.120395	0.768884
	4.989	26.661	0.116802	0.71579
	4.554	28.13	0.104779	0.756391
	4.678	24.435	0.108206	0.654266
	5.068	29.582	0.118985	0.796523
	4.712	24.424	0.109146	0.653962
	5.107	27.746	0.120063	0.745778
	4.35	20.802	0.09914	0.553854
	5.367	27.486	0.127249	0.738592
	4.712	28.768	0.109146	0.774025
	4.407	22.944	0.100716	0.613057
	4.232	25.153	0.095879	0.674111
	5.266	26.006	0.124458	0.697687
	3.853	28.763	0.085404	0.773887
	5.243	29.921	0.123822	0.805893
	5.192	26.621	0.122412	0.714685
	4.859	26.175	0.113209	0.702358
	5.305	27.379	0.125536	0.735635
	3.316	30.169	0.070562	0.812747
	3.734	28.079	0.082115	0.754982
	4.056	30.452	0.091015	0.820569
	4.994	27.299	0.11694	0.733424
	5.797	28.316	0.139134	0.761532
	4.237	22.898	0.096017	0.611785
	5.695	29.785	0.136315	0.802134
	4.056	25.531	0.091015	0.684558
	4.571	28.023	0.105249	0.753434
	4.576	25.684	0.105387	0.688787
	4.277	29.232	0.097123	0.786849
	5.26	26.164	0.124292	0.702054
	4.294	24.119	0.097593	0.645532
	4.153	25.429	0.093696	0.681739
	5.203	25.531	0.122716	0.684558
	4.203	26.802	0.095078	0.719687
	6.39	22.893	0.155524	0.611647
	5.215	25.989	0.123048	0.697217
	4.028	21.588	0.090241	0.575578
	4.486	25.859	0.102899	0.693624
	4.446	22.554	0.101794	0.602277
	4.808	24.062	0.111799	0.643957
	5.74	23.667	0.137558	0.633039
	4.226	26.514	0.095713	0.711727
	4.881	25.774	0.113817	0.691274
	3.853	24.373	0.085404	0.652552
	4.102	26.616	0.092286	0.714546
	5.35	24.52	0.126779	0.656615
	3.395	22.379	0.072745	0.597441
	5.322	26.277	0.126005	0.705177
	4.22	28.04	0.095547	0.753904
	3.915	25.893	0.087118	0.694563
	5.915	26.232	0.142395	0.703933
	4.277	22.627	0.097123	0.604295
	6.023	24.475	0.14538	0.655372
	4.797	25.141	0.111495	0.673779
	4.107	29.006	0.092424	0.780603
	4.921	27.763	0.114922	0.746248
	6.085	28.079	0.147094	0.754982
	5.034	28.034	0.118045	0.753738
	5.661	25.672	0.135375	0.688455
	5.723	27.13	0.137089	0.728753
	4.712	27.819	0.109146	0.747796
	5.006	26.972	0.117271	0.724386
	3.266	26.362	0.06918	0.707526
	4.797	25.045	0.111495	0.671126
	4.424	24.169	0.101186	0.646914
	5.723	28.672	0.137089	0.771372
	5.582	25.977	0.133191	0.696885
	4.955	25.87	0.115862	0.693928
	6.232	27.056	0.151157	0.726707
	4.186	23.989	0.094608	0.641939
	4.192	23.158	0.094773	0.618971
	5.124	27.181	0.120533	0.730162
	5.435	26.203	0.129129	0.703131
	3.74	25.966	0.082281	0.696581
	4.831	26.864	0.112435	0.721401
	4.13	26.74	0.09306	0.717974
	4.689	24.757	0.10851	0.663166
	4.768	24.04	0.110693	0.643349
	3.486	24.407	0.07526	0.653492
	5.35	26.322	0.126779	0.70642
	4.938	23.508	0.115392	0.628645
	3.373	21.26	0.072137	0.566513
	5.678	25.294	0.135845	0.678008
	5.051	26.785	0.118515	0.719217
	5.096	28.559	0.119759	0.768249
	4.785	27.446	0.111163	0.737487
	4.463	28.345	0.102264	0.762334
	4.706	25.91	0.10898	0.695033
	3.435	26.734	0.073851	0.717808
	5.328	25.593	0.126171	0.686272
	4.215	29.599	0.095409	0.796993
	4.164	27.277	0.094	0.732816
	4.339	24.91	0.098836	0.667394
	5.102	26.96	0.119925	0.724054
	4.966	25.932	0.116166	0.695641
	5.232	22.429	0.123518	0.598823
	5.96	25.429	0.143639	0.681739
	5.079	25.706	0.119289	0.689395
	5.576	25.056	0.133026	0.67143
	4.136	24.181	0.093226	0.647246
	4.056	26.746	0.091015	0.718139
	5.395	25.938	0.128023	0.695807
	3.621	24.808	0.078992	0.664575
	4.814	20.525	0.111965	0.546198
	5.379	27.153	0.127581	0.729388
	4.96	25.96	0.116	0.696415
	4.441	26.565	0.101656	0.713137
	4.299	20.638	0.097731	0.549321
	5.26	25.808	0.124292	0.692214
	4.91	25.395	0.114618	0.680799
	4.096	24.921	0.09212	0.667699
	5.237	24.672	0.123656	0.660816
	6.559	23.458	0.160195	0.627263
	5.034	25.712	0.118045	0.689561
	3.746	25.729	0.082447	0.690031
	4.734	25.395	0.109754	0.680799
	4.011	26.141	0.089771	0.701418
	2.797	17.418	0.056217	0.460324
	5.153	26.373	0.121334	0.70783
	4.209	22.26	0.095243	0.594152
	4.763	25.175	0.110555	0.674719
	6.282	27.39	0.152539	0.735939
	3.904	27.514	0.086814	0.739366
	4.972	27.531	0.116332	0.739836
	4.797	26.39	0.111495	0.7083
	4.74	27.062	0.10992	0.726873
	7.147	28.763	0.176446	0.773887
	4.644	27.203	0.107266	0.73077
	4.825	26.802	0.112269	0.719687
	5.492	26.333	0.130704	0.706725
	7.073	29.079	0.174401	0.782621
	5.463	29.706	0.129902	0.79995
	4.616	26.78	0.106492	0.719079
	5.593	25.424	0.133495	0.681601
	4.215	23.571	0.095409	0.630386
	5.277	25.305	0.124762	0.678312
	5.915	25.209	0.142395	0.675658
	5.655	27.859	0.135209	0.748901
	4.864	27.282	0.113347	0.732954
	4.339	23.215	0.098836	0.620547
	5.401	27.266	0.128189	0.732512
	4.644	24.107	0.107266	0.645201
	4.395	24.571	0.100384	0.658025
	4.52	22.893	0.103839	0.611647
	4.791	25.955	0.111329	0.696277
	6.028	25.429	0.145518	0.681739
	5.412	25.085	0.128493	0.672231
	4.537	22.819	0.104309	0.609602
	5.169	24.819	0.121777	0.664879
	5.034	22.808	0.118045	0.609298
	4.441	23.588	0.101656	0.630856
	5.61	23.22	0.133965	0.620685
	5.379	25.994	0.127581	0.697355
	5.023	26.65	0.117741	0.715486
	5.531	26.52	0.131782	0.711893
	5.198	23.311	0.122578	0.6232
	4.26	26.062	0.096653	0.699234
	4.96	24.836	0.116	0.665349
	5.78	27.028	0.138664	0.725934
	5.887	25.797	0.141621	0.69191
	5.316	25.729	0.12584	0.690031
	5.435	25.446	0.129129	0.682209
	6.062	25.328	0.146458	0.678948
	3.983	25.175	0.088997	0.674719
	5.87	25.593	0.141151	0.686272
	4.232	24.966	0.095879	0.668942
	5.322	21.932	0.126005	0.585086
	5.322	26.113	0.126005	0.700644
	3.26	22.723	0.069014	0.606948
	5.175	25.718	0.121942	0.689727
	4.525	27.345	0.103977	0.734695
	3.944	25.548	0.087919	0.685028
	4.599	25.853	0.106022	0.693458
	4.288	26.469	0.097427	0.710483
	6.367	25.797	0.154888	0.69191
	6.723	27.192	0.164727	0.730466
	4.638	28.542	0.1071	0.767779
	5.22	27.119	0.123186	0.728449
	6.158	27.684	0.149111	0.744065
	4.96	25.113	0.116	0.673005
	6.107	28.045	0.147702	0.754042
	5.842	26.831	0.140378	0.720489
	5.531	27.141	0.131782	0.729057
	5.373	27.955	0.127415	0.751555
	4.949	26.192	0.115696	0.702827
	5.989	26.407	0.14444	0.70877
	4.237	26.458	0.096017	0.710179
	4.955	23.977	0.115862	0.641607
	6.955	25.61	0.17114	0.686742
	6.757	27.61	0.165667	0.742019
	6.198	28.028	0.150217	0.753572
	5.932	24.26	0.142865	0.649429
	5.797	25.904	0.139134	0.694867
	5.582	23.763	0.133191	0.635693
	5.548	25.52	0.132252	0.684254
	5.887	23.859	0.141621	0.638346
	5.949	23.802	0.143335	0.636771
	5.48	24.299	0.130372	0.650507
	4.463	25.576	0.102264	0.685802
	5.39	23.395	0.127885	0.625522
	5.407	25.944	0.128355	0.695973
	5.994	24.548	0.144579	0.657389
	5.299	25.418	0.12537	0.681435
	4.429	21.565	0.101324	0.574943
	4.486	23.791	0.102899	0.636467
	6.39	25.407	0.155524	0.681131
	4.949	27.384	0.115696	0.735773
	5.266	26.729	0.124458	0.717669
	4.017	25.599	0.089937	0.686438
	5.706	29.254	0.136619	0.787458
	5.056	27.48	0.118653	0.738426
	4.661	27.446	0.107736	0.737487
	5.881	29.068	0.141455	0.782317
	6.497	29.169	0.158481	0.785108
	5.339	24.339	0.126475	0.651613
	6.215	28.237	0.150687	0.759349
	3.983	27.407	0.088997	0.736409
	4.842	28.706	0.112739	0.772311
	5.011	26.678	0.11741	0.71626
	5.333	28.712	0.126309	0.772477
	5.282	27.938	0.1249	0.751085
	5.458	30.418	0.129764	0.819629
	5.446	25.955	0.129433	0.696277
	6.746	28.847	0.165363	0.776209
	6.277	27.045	0.1524	0.726403
	4.226	27.339	0.095713	0.734529
	4.345	27.565	0.099002	0.740776
	5.554	21.356	0.132418	0.569166
	5.062	26.52	0.118819	0.711893
	5.147	24.763	0.121169	0.663332
	5.751	25.299	0.137862	0.678146
	4.593	24.627	0.105857	0.659573
	5.379	22.655	0.127581	0.605069
	5.638	25.463	0.134739	0.682679
	4.672	23.028	0.10804	0.615378
	3.514	25.203	0.076034	0.675493
	5.938	21.492	0.143031	0.572925
	5.893	26.571	0.141787	0.713303
	5.469	27.056	0.130068	0.726707
	4.633	25.972	0.106962	0.696747
	6.045	25.158	0.145988	0.674249
	4.684	26.616	0.108372	0.714546
	3.842	21.944	0.0851	0.585418
	5.74	28.655	0.137558	0.770902
	4.175	25.994	0.094304	0.697355
	6.034	24.441	0.145684	0.654432
	5.26	27.011	0.124292	0.725464
	5.91	23.893	0.142257	0.639286
	5.136	26.61	0.120865	0.71438
	5.559	24.638	0.132556	0.659877
	5.621	27.282	0.134269	0.732954
	4.627	24.571	0.106796	0.658025
	5.853	22.633	0.140682	0.604461
	5.028	23.305	0.11788	0.623034
	4.034	26.158	0.090407	0.701888
	5.051	26.689	0.118515	0.716564
	4.706	26.74	0.10898	0.717974
	4.774	24.051	0.110859	0.643653
	4.04	25.333	0.090572	0.679086
	5.548	24.362	0.132252	0.652248
	4.972	23	0.116332	0.614604
	4.113	24.153	0.09259	0.646472
	5.311	24.96	0.125701	0.668776
	3	18.452	0.061828	0.488903
	5.119	23.915	0.120395	0.639894
	3.825	23.876	0.08463	0.638816
	5.571	25.847	0.132887	0.693292
	4.576	24.644	0.105387	0.660043
	4.672	24.96	0.10804	0.668776
	4.294	25.203	0.097593	0.675493
	5.621	24.904	0.134269	0.667229
	5.35	26.463	0.126779	0.710318
	4.729	26.062	0.109616	0.699234
	5.876	25.96	0.141317	0.696415
	4.661	24.825	0.107736	0.665045
	5.011	24.65	0.11741	0.660208
	5.232	21.542	0.123518	0.574307
	5.571	21.915	0.132887	0.584616
	4.785	21.277	0.111163	0.566983
	5.288	23.644	0.125066	0.632404
	4.062	21.446	0.09118	0.571654
	4.734	21.525	0.109754	0.573837
	4.305	24.186	0.097897	0.647384
	5.887	21.068	0.141621	0.561206
	5.328	19.079	0.126171	0.506233
	4.797	23.983	0.111495	0.641773
	4.915	23.616	0.114756	0.63163
	4.48	22.452	0.102733	0.599458
	5.254	25.701	0.124126	0.689257
	4.203	26.243	0.095078	0.704237
	3.407	19.876	0.073077	0.528261
	4.35	22.887	0.09914	0.611481
	4.706	21.492	0.10898	0.572925
	3.52	24.881	0.0762	0.666593
	3.672	22.842	0.080401	0.610237
	6.141	26.181	0.148642	0.702523
	3.017	19.028	0.062298	0.504823
	5.785	21.797	0.138802	0.581355
	4.215	24.237	0.095409	0.648794
	3.774	23.542	0.08322	0.629585
	5.503	21.701	0.131008	0.578702
	4.599	21.757	0.106022	0.580249
	4.898	22.983	0.114287	0.614134
	3.164	25.299	0.066361	0.678146
	4.576	18.486	0.105387	0.489843
	4.898	21.119	0.114287	0.562616
	4.955	22.124	0.115862	0.590393
	5.746	22	0.137724	0.586966
	5.384	19.989	0.127719	0.531384
	4.785	18.689	0.111163	0.495453
	4.706	23.621	0.10898	0.631768
	5.305	20.282	0.125536	0.539482
	5.831	21.04	0.140074	0.560432
	4.819	18.023	0.112103	0.477046
	5.305	21.085	0.125536	0.561676
	5.237	21	0.123656	0.559327
	3.458	19.802	0.074487	0.526215
	6.13	19.486	0.148338	0.517482
	4.847	19.876	0.112877	0.528261
	4.616	15.079	0.106492	0.395677
	3.842	20.633	0.0851	0.549183
	5.87	18.373	0.141151	0.48672
	5.028	20.627	0.11788	0.549017
	3.949	18.514	0.088057	0.490617
	4.633	19.768	0.106962	0.525276
	3.887	16.079	0.086344	0.423316
	5.35	18.452	0.126779	0.488903
	5.09	18.638	0.119593	0.494044
	6.203	19.684	0.150355	0.522954
	4.429	18.367	0.101324	0.486554
	4.514	18.904	0.103673	0.501396
	5.87	22.209	0.141151	0.592742
	6.028	21.316	0.145518	0.568061
	6.989	21.22	0.172079	0.565407
	7.938	17.949	0.198309	0.475001
	3.944	20.571	0.087919	0.54747
	5.791	20.232	0.138968	0.5381
	4.751	21.006	0.110224	0.559493
	5.61	20.492	0.133965	0.545286
	4.695	21.147	0.108676	0.56339
	5.559	21.079	0.132556	0.56151
	5.141	18.153	0.121003	0.480639
	4.644	18.226	0.107266	0.482657
	4.802	19.983	0.111633	0.531218
	5.977	20.859	0.144109	0.55543
	6.028	17.034	0.145518	0.449711
	4.429	15.853	0.101324	0.41707
	4.565	18.192	0.105083	0.481717
	7.322	18.418	0.181283	0.487963
	4.898	18.113	0.114287	0.479533
	5.751	16.181	0.137862	0.426135
	5.774	19.023	0.138498	0.504685
	3.209	18.633	0.067605	0.493906
	5.316	16.831	0.12584	0.4441
	5.689	18.791	0.136149	0.498273
	5.362	19.949	0.127111	0.530278
	5.458	20.661	0.129764	0.549957
	5.938	18.571	0.143031	0.492192
	5.949	18.729	0.143335	0.496559
	5.452	18.701	0.129598	0.495785
	6.085	17.232	0.147094	0.455184
	6.249	18.887	0.151627	0.500926
	6.345	19.972	0.15428	0.530914
	5.887	17.989	0.141621	0.476106
	6.362	19.994	0.15475	0.531522
	5.972	20.147	0.143971	0.535751
	6.181	18.028	0.149747	0.477184
	5.768	16.497	0.138332	0.434869
	7.209	17.373	0.17816	0.459081
	7.559	15.565	0.187833	0.40911
	7.627	14.056	0.189713	0.367403
	6.333	16.328	0.153948	0.430198
	7.65	16.345	0.190349	0.430668
	7.028	12.847	0.173157	0.333987
	7.124	18.729	0.175811	0.496559
	7.802	15.537	0.19455	0.408336
	6.87	14.407	0.16879	0.377104
	4.825	16.328	0.112269	0.430198
	7.006	15.475	0.172549	0.406622
	7.689	12.898	0.191426	0.335397
	6.904	14.079	0.16973	0.368038
	7.362	12.073	0.182389	0.312595
	7.576	13.96	0.188303	0.364749
	3.203	13.638	0.067439	0.35585
	7.678	11.153	0.191122	0.287167
	6.571	12.559	0.160526	0.326027
	5.627	14.91	0.134435	0.391006
	5.887	12.215	0.141621	0.31652
	5.085	14.644	0.119455	0.383654
	5.757	14.203	0.138028	0.371466
	6.723	14.859	0.164727	0.389597
	5.904	12.356	0.142091	0.320417
	7.345	12	0.181919	0.310577
	5.921	11.734	0.142561	0.303225
	7.859	9.633	0.196125	0.245156
	5.667	10.887	0.135541	0.279815
	6.458	13.237	0.157403	0.344767
	6.164	12.367	0.149277	0.320721
	6.831	11.797	0.167712	0.304967
	5.96	11.011	0.143639	0.283243
	7.136	8.655	0.176142	0.218126
	7.198	10.407	0.177856	0.266549
	6.52	11.616	0.159117	0.299964
	7.757	9.768	0.193306	0.248888
	5.52	10.554	0.131478	0.270612
	7.362	9.311	0.182389	0.236257
	7.079	8.932	0.174567	0.225781
	6.989	10.379	0.172079	0.265775
	7.13	10.215	0.175976	0.261242
	7.424	9.141	0.184102	0.231558
	9.232	9.893	0.234073	0.252342
	7.119	8.757	0.175672	0.220945
	6.412	9.712	0.156132	0.24734
	6.966	10.006	0.171444	0.255466
	5.418	8.944	0.128659	0.226113
	7.045	8.65	0.173627	0.217987
	7.441	8.932	0.184572	0.225781
	7.169	10.215	0.177054	0.261242
	7.469	10.446	0.185346	0.267627
	5.87	9.254	0.141151	0.234681
	8.367	10.695	0.210166	0.274509
	8.667	8.972	0.218457	0.226887
	7.96	10.881	0.198917	0.27965
	8.367	9.588	0.210166	0.243913
	9.22	7.593	0.233741	0.188773
	6.966	9.068	0.171444	0.22954
	8.576	8.955	0.215942	0.226417
	8.141	7.944	0.203919	0.198474
	8.153	7.938	0.204251	0.198309
	8.938	7.994	0.225947	0.199856
	8.689	6.661	0.219065	0.163014
	8.554	7.921	0.215334	0.197839
	7.446	8.051	0.18471	0.201432
	5.141	7.593	0.121003	0.188773
	5.938	6.898	0.143031	0.169564
	6.893	6.701	0.169426	0.164119
	6.514	6.785	0.158951	0.166441
	5.746	4.475	0.137724	0.102595
	7.446	6.056	0.18471	0.146292
	6.695	6.395	0.163953	0.155662
	6.949	4.627	0.170974	0.106796
	4.243	5.525	0.096183	0.131616
	7.921	6.475	0.197839	0.157873
	7.571	4.52	0.188165	0.103839
	7	6.153	0.172383	0.148973
	8.554	4.565	0.215334	0.105083
	8.87	4.853	0.224068	0.113043
	6.627	4.153	0.162074	0.093696
	7.842	4.26	0.195655	0.096653
	7.802	5.876	0.19455	0.141317
	8.266	6.328	0.207374	0.15381
	6.768	4.339	0.165971	0.098836
	8.548	6.186	0.215168	0.149885
	6.192	5.904	0.150051	0.142091
	6.429	4.836	0.156602	0.112573
	7.853	3.944	0.195959	0.087919
	6.153	5.045	0.148973	0.118349
	7.085	6.254	0.174733	0.151765
	6.887	5.181	0.16926	0.122108
	5.904	5.904	0.142091	0.142091
	9.203	5.836	0.233272	0.140212
	9.633	6.593	0.245156	0.161134
	10.203	5	0.26091	0.117106
	5.407	7.062	0.128355	0.174097
	7.299	6.096	0.180647	0.147398
	7.525	6.633	0.186894	0.16224
	7.994	5.271	0.199856	0.124596
	6.299	5.565	0.153008	0.132722
	7.814	5.463	0.194881	0.129902
	8.853	4.955	0.223598	0.115862
	11.147	4.808	0.287001	0.111799
	9.887	4.791	0.252177	0.111329
	9.927	5.362	0.253282	0.127111
	10.667	5.198	0.273735	0.122578
	9.548	4.079	0.242807	0.09165
	9.96	4.412	0.254194	0.100854
	11.277	2.96	0.290595	0.060722
	15.034	4.582	0.394434	0.105553
	14.52	4.186	0.380227	0.094608
	9.904	5.605	0.252646	0.133827
	11.452	4.147	0.295431	0.09353
	11.486	3.294	0.296371	0.069954
	12.266	2.814	0.317929	0.056687
	14.486	3.249	0.379287	0.06871
	9.927	4.062	0.253282	0.09118
	10.61	3.949	0.272159	0.088057
	13.056	2.938	0.339764	0.060114
	11.339	4.333	0.292308	0.098671
	11.831	3.955	0.305906	0.088223
	10.514	2.797	0.269506	0.056217
	13.571	2.989	0.353998	0.061524
	12.107	2.441	0.313535	0.046378
	13.74	3.367	0.358669	0.071971
	13.774	2.672	0.359609	0.052762
	14.09	2.418	0.368343	0.045742
	13.74	3.192	0.358669	0.067135
	12.362	2.684	0.320583	0.053094
	15.718	2.582	0.413338	0.050275
	15.859	2.966	0.417236	0.060888
	13.548	2.147	0.353362	0.038252
	14.734	2.893	0.386142	0.058871
	14.35	1.927	0.375529	0.032172
	13.853	2.469	0.361792	0.047152
	13.141	2.689	0.342113	0.053232
	13.559	1.853	0.353666	0.030126
	12.593	2.469	0.326967	0.047152
	15.955	2.056	0.419889	0.035737
	11.932	2.249	0.308698	0.041071
	11.537	2.486	0.297781	0.047622
	15.802	2.215	0.41566	0.040132
	10.898	2.288	0.280119	0.042149
	13.723	2.503	0.358199	0.048092
	13.192	2.333	0.343523	0.043393
	12.051	1.904	0.311987	0.031536
	14.593	2.605	0.382245	0.050911
	13.435	2.514	0.350239	0.048396
	10.582	3.508	0.271386	0.075869
	13.006	2.237	0.338382	0.04074
	13.282	2.672	0.34601	0.052762
	13.508	2.136	0.352257	0.037948
	12.028	1.65	0.311351	0.024516
	11.463	2.977	0.295735	0.061192
	14.723	2.791	0.385838	0.056052
	12.045	2.706	0.311821	0.053702
	11.333	3.339	0.292142	0.071198
	12.492	3.316	0.324176	0.070562
	12.345	2.181	0.320113	0.039192
	12.249	2.955	0.317459	0.060584
	12.028	1.96	0.311351	0.033084
	11.107	2.299	0.285896	0.042453
	10.395	1.661	0.266217	0.02482
	11.384	1.977	0.293552	0.033554
	10.887	1.458	0.279815	0.019209
	10.153	3.209	0.259528	0.067605
	10.921	2.684	0.280755	0.053094
	9.571	2.311	0.243443	0.042785
	8.237	2.774	0.206573	0.055582
	13.198	2.876	0.343689	0.058401
	10.746	3.531	0.275918	0.076504
	9.831	3.119	0.250629	0.065117
	9.672	4.096	0.246234	0.09212
	12.729	3.136	0.330726	0.065587
	11.243	2.689	0.289655	0.053232
	9.266	4.695	0.235013	0.108676
	8.729	4.316	0.220171	0.098201
	8.78	3.096	0.22158	0.064481
	11.056	3.35	0.284486	0.071502
	8.554	4.113	0.215334	0.09259
	11.537	3.299	0.297781	0.070092
	6.994	2.847	0.172217	0.057599
	9.181	2.864	0.232664	0.058069
	9.362	3.311	0.237666	0.070424
	8.706	3.525	0.219535	0.076338
	9.497	4.508	0.241397	0.103507
	9.537	4.023	0.242503	0.090103
	9.22	3.051	0.233741	0.063238
	10.379	2.107	0.265775	0.037147
	8.825	2.712	0.222824	0.053868
	10.763	2.706	0.276388	0.053702
	9.797	3.169	0.249689	0.066499
	11.864	2.91	0.306818	0.059341
	8.017	3.209	0.200492	0.067605
	6.91	3.073	0.169896	0.063846
	8.774	3.39	0.221415	0.072607
	7.96	3.588	0.198917	0.07808
	8.379	2.989	0.210497	0.061524
	7.288	2.593	0.180343	0.050579
	8.797	4.141	0.22205	0.093364
	6.96	3.164	0.171278	0.066361
	8	3.61	0.200022	0.078688
	9.384	2.672	0.238274	0.052762
	8.571	4.203	0.215804	0.095078
	6.734	3.61	0.165031	0.078688
	8.65	3.644	0.217987	0.079627
	8.593	3.034	0.216412	0.062768
	7.373	3.266	0.182693	0.06918
	8.192	3.04	0.205329	0.062934
	7.282	3.158	0.180177	0.066195
	5.785	2.881	0.138802	0.058539
	10	3.881	0.2553	0.086178
	9.305	3.333	0.236091	0.071032
	8.616	2.734	0.217048	0.054476
	9.966	3.927	0.25436	0.087449
	12.153	3.458	0.314806	0.074487
	7.249	4.028	0.179265	0.090241
	8.718	3.864	0.219867	0.085708
	7.006	2.842	0.172549	0.057461
	8.017	3.254	0.200492	0.068848
	8.548	3.695	0.215168	0.081037
	9	2.599	0.227661	0.050745
	9.147	3.61	0.231724	0.078688
	10.379	3.949	0.265775	0.088057
	11.582	2.949	0.299024	0.060418
	8.311	3.859	0.208618	0.08557
	8.559	4.22	0.215472	0.095547
	7.672	3.429	0.190957	0.073685
	9.542	4.147	0.242641	0.09353
	8.305	3.881	0.208452	0.086178
	9.062	3.627	0.229375	0.079158
	8.571	4.198	0.215804	0.094939
	9.678	4.497	0.2464	0.103203
	10.497	3.881	0.269036	0.086178
	8.181	3.412	0.205025	0.073215
	9.175	3.605	0.232498	0.07855
	8.395	3.458	0.210939	0.074487
	10.051	3.384	0.256709	0.072441
	9.079	3.452	0.229844	0.074321
	9.605	3.164	0.244382	0.066361
	9.887	2.876	0.252177	0.058401
	7.627	2.774	0.189713	0.055582
	9.921	2.983	0.253116	0.061358
	7.972	2.537	0.199248	0.049031
	9.339	2.695	0.23703	0.053398
	8.322	3.328	0.208922	0.070894
	8.209	2.542	0.205799	0.049169
	7.271	2.571	0.179873	0.049971
	9.435	3.056	0.239684	0.063376
	10.52	3.102	0.269672	0.064647
	8.684	2.757	0.218927	0.055112
	10.215	2.78	0.261242	0.055747
	12.672	2.927	0.329151	0.05981
	10.379	2.819	0.265775	0.056825
	10.09	2.565	0.257787	0.049805
	11.028	3.379	0.283712	0.072303
	12.102	2.842	0.313397	0.057461
	11.87	1.74	0.306984	0.027003
	11.989	2.119	0.310273	0.037478
	9.571	2.655	0.243443	0.052293
	9.153	1.831	0.23189	0.029518
	8.243	2.379	0.206738	0.044664
	8.113	2.006	0.203145	0.034355
	9.294	1.52	0.235787	0.020923
	7.972	1.983	0.199248	0.033719
	11.486	2.401	0.296371	0.045272
	11.559	2.842	0.298389	0.057461
	9.627	2.051	0.24499	0.035599
	9.955	1.859	0.254056	0.030292
	9.362	1.864	0.237666	0.03043
	10.085	2.373	0.257649	0.044498
	13	1.537	0.338216	0.021392
	8.87	1.616	0.224068	0.023576
	10.983	2.096	0.282469	0.036843
	8.819	2.294	0.222658	0.042315
	11.412	1.819	0.294326	0.029187
	11.011	2.243	0.283243	0.040905
	9.921	2.226	0.253116	0.040436
	10.362	1.949	0.265305	0.03278
	10.429	2.48	0.267157	0.047456
	9.655	2.345	0.245764	0.043725
	9.814	1.757	0.250159	0.027473
	11.944	1.548	0.30903	0.021696
	11.469	1.966	0.295901	0.033249
	10.316	1.802	0.264034	0.028717
	9.441	1.655	0.23985	0.024654
	10.633	1.638	0.272795	0.024184
	10.198	1.87	0.260772	0.030596
	11.593	2.096	0.299328	0.036843
	10.497	2.136	0.269036	0.037948
	9.192	1.955	0.232968	0.032945
	8.921	1.153	0.225477	0.010779
	12.209	1.853	0.316354	0.030126
	10.627	1.921	0.272629	0.032006
	9.87	1.802	0.251707	0.028717
	10.746	1.571	0.275918	0.022332
	11.175	1.045	0.287775	0.007794
	12.678	1.706	0.329316	0.026063
	8.966	1.836	0.226721	0.029656
	11.085	1.277	0.285288	0.014206
	12.401	1.96	0.321661	0.033084
	11.955	1.294	0.309334	0.014676
	12.362	1.531	0.320583	0.021227
	11.825	1.192	0.305741	0.011857
	10.311	1.164	0.263895	0.011083
	12.136	1.446	0.314336	0.018877
	12.277	1.339	0.318233	0.01592
	11.932	1.435	0.308698	0.018573
	11.141	1.345	0.286836	0.016086
	11.475	1.243	0.296067	0.013267
	11.492	1.356	0.296537	0.01639
	11.774	1.65	0.304331	0.024516
	11.198	1.785	0.288411	0.028247
	12.011	1.718	0.310881	0.026395
	12.328	1.407	0.319643	0.017799
	11.734	1.39	0.303225	0.01733
	11.667	1.689	0.301374	0.025594
	11.04	1.938	0.284044	0.032476
	13.514	1.836	0.352423	0.029656
	10.751	1.678	0.276056	0.02529
	10.559	1.226	0.27075	0.012797
	11.508	1.667	0.296979	0.024985
	11.006	1.486	0.283104	0.019983
	15.441	1.503	0.405683	0.020453
	12.198	1.576	0.31605	0.02247
	12.757	1.955	0.3315	0.032945
	14.017	1.169	0.366325	0.011221
	11.616	1.655	0.299964	0.024654
	12.175	1.599	0.315414	0.023106
	13.034	1.689	0.339156	0.025594
	13	1.542	0.338216	0.021531
	12.695	1.74	0.329786	0.027003
	11.734	1.237	0.303225	0.013101
	13.316	1.254	0.34695	0.013571
	13.633	1.537	0.355712	0.021392
	11.859	1.124	0.30668	0.009978
	12.712	1.136	0.330256	0.010309
	12.412	1.576	0.321965	0.02247
	13.797	1.362	0.360244	0.016556
	12.746	1.271	0.331196	0.014041
	12.373	1.316	0.320887	0.015284
	14.424	1.723	0.377574	0.026533
	13.158	1.136	0.342583	0.010309
	13.503	1.345	0.352119	0.016086
	11.966	0.938	0.309638	0.004837
	13.435	1.864	0.350239	0.03043
	10.859	1.164	0.279041	0.011083
	13.887	1.559	0.362732	0.022
	12.203	1.751	0.316188	0.027307
	14.853	1.407	0.389431	0.017799
	11.333	1.096	0.292142	0.009204
	10.983	1.39	0.282469	0.01733
	12.023	1.576	0.311213	0.02247
	13.418	1.373	0.349769	0.01686
	10.52	1.582	0.269672	0.022636
	14.056	2.311	0.367403	0.042785
	13.362	1.65	0.348221	0.024516
	10.203	1.621	0.26091	0.023714
	11.006	1.531	0.283104	0.021227
	12.186	1.582	0.315718	0.022636
	10.859	1.164	0.279041	0.011083
	12.718	1.565	0.330422	0.022166
	11.085	1.808	0.285288	0.028883
	11.531	1.734	0.297615	0.026837
	14.006	1.356	0.366021	0.01639
	12.661	1.859	0.328847	0.030292
	11.734	2.548	0.303225	0.049335
	15.011	1.972	0.393798	0.033415
	10.621	1.718	0.272463	0.026395
	9.503	1.621	0.241563	0.023714
	12.362	1.554	0.320583	0.021862
	11.09	2.136	0.285426	0.037948
	11.966	2.446	0.309638	0.046516
	13.181	2.017	0.343219	0.034659
	11.04	1.633	0.284044	0.024046
	11.87	2.006	0.306984	0.034355
	10.401	2.158	0.266383	0.038556
	11.418	1.774	0.294492	0.027943
	13.362	2.237	0.348221	0.04074
	11.52	1.554	0.297311	0.021862
	13.938	2.028	0.364141	0.034963
	10.65	2.39	0.273265	0.044968
	10.955	2.475	0.281695	0.047318
	10.299	1.791	0.263564	0.028413
	10.48	1.073	0.268566	0.008568
	10.921	2.791	0.280755	0.056052
	12.237	1.412	0.317128	0.017938
	11.407	1.932	0.294188	0.03231
	10.893	1.305	0.279981	0.01498
	12.124	1.531	0.314005	0.021227
	12.124	1.633	0.314005	0.024046
	12.164	1.831	0.31511	0.029518
	12.367	1.814	0.320721	0.029048
	11.554	1.384	0.29825	0.017164
	14.266	1.746	0.373207	0.027169
	11.271	2.045	0.290429	0.035433
	11.74	1.96	0.303391	0.033084
	10.554	2.305	0.270612	0.042619
	13.237	1.311	0.344767	0.015146
	10.35	2.243	0.264973	0.040905
	13.972	2.299	0.365081	0.042453
	11.339	1.819	0.292308	0.029187
	13.537	1.508	0.353058	0.020591
	11.339	1.949	0.292308	0.03278
	11.305	1.395	0.291368	0.017468
	11.147	1.322	0.287001	0.01545
	12.147	1.684	0.31464	0.025455
	14	1.887	0.365855	0.031066
	13.847	1.492	0.361626	0.020149
	12.966	1.791	0.337276	0.028413
	11.164	1.718	0.287471	0.026395
	11.441	1.452	0.295127	0.019043
	12.294	1.186	0.318703	0.011691
	12.39	0.774	0.321357	0.000304
	14.593	1.712	0.382245	0.026229
	10.554	1	0.270612	0.00655
	12.684	1.627	0.329482	0.02388
	12.616	1.203	0.327603	0.012161
	12.073	1.102	0.312595	0.00937
	12.712	1.78	0.330256	0.028109
	11.124	1.876	0.286366	0.030762
	13.305	1.26	0.346646	0.013736
	13.497	1.463	0.351953	0.019347
	10.706	1.345	0.274813	0.016086
	10.734	0.921	0.275587	0.004367
	10.927	1.13	0.280921	0.010143
	10.638	1.203	0.272933	0.012161
	11.418	1.565	0.294492	0.022166
	11.096	0.881	0.285592	0.003261
	11.695	1.017	0.302148	0.00702
	10.65	1.407	0.273265	0.017799
	10.814	1.153	0.277798	0.010779
	11.056	1.158	0.284486	0.010917
	11.028	1.616	0.283712	0.023576
	13.859	1.559	0.361958	0.022
	14.525	1.452	0.380365	0.019043
	12.023	1.497	0.311213	0.020287
	12.599	1.333	0.327133	0.015754
	12.034	1.356	0.311517	0.01639
	11.898	1.13	0.307758	0.010143
	12.362	0.763	0.320583	0
	11.819	1.751	0.305575	0.027307
	9.78	1.328	0.249219	0.015616
	9.508	1.181	0.241701	0.011553
	11.667	1.299	0.301374	0.014814
	13.774	1.407	0.359609	0.017799
	11.282	1.785	0.290733	0.028247
	12.458	1.26	0.323236	0.013736
	12.78	1.181	0.332136	0.011553
	11.729	1.554	0.303087	0.021862
	14.367	0.972	0.375998	0.005777
	12.514	1.395	0.324784	0.017468
	11	1.079	0.282939	0.008734
	10.441	1.288	0.267488	0.01451
	9.729	1.328	0.24781	0.015616
	13.333	1.339	0.34742	0.01592
	10.345	1.52	0.264835	0.020923
	14.785	1.571	0.387551	0.022332
	12.96	1.938	0.337111	0.032476
	10.881	1.051	0.27965	0.00796
	12.056	1.311	0.312125	0.015146
	12.073	1.395	0.312595	0.017468
	12.164	1.288	0.31511	0.01451
	9.87	1.65	0.251707	0.024516
	11.373	1.147	0.293248	0.010613
	11.085	0.887	0.285288	0.003427
	9.04	1.65	0.228766	0.024516
	13.559	1.299	0.353666	0.014814
	11.254	1.525	0.289959	0.021061
	11.734	1.045	0.303225	0.007794
	12.102	1.034	0.313397	0.00749
	10.164	1.192	0.259833	0.011857
	10.565	0.842	0.270916	0.002183
	11.91	1.729	0.30809	0.026699
	11.062	1.65	0.284652	0.024516
	9.644	1.113	0.24546	0.009674
	11.74	0.96	0.303391	0.005445
	13.215	1.48	0.344159	0.019817
	11.497	1.746	0.296675	0.027169
	11.542	1.61	0.297919	0.02341
	10.124	1.492	0.258727	0.020149
	13.243	1.554	0.344932	0.021862
	9.808	1.215	0.249993	0.012493
	9.819	1.362	0.250297	0.016556
	11.028	1.548	0.283712	0.021696
	12.051	1.576	0.311987	0.02247
	10.559	1.452	0.27075	0.019043
	12.096	1.277	0.313231	0.014206
	10.158	1.277	0.259667	0.014206
	10.701	1.678	0.274675	0.02529
	10.91	1.661	0.280451	0.02482
	11.424	1.458	0.294657	0.019209
	12.13	1.458	0.31417	0.019209
	10.017	1.52	0.25577	0.020923
	10.746	1.056	0.275918	0.008098
	10.39	1.011	0.266079	0.006854
	10.757	1.311	0.276222	0.015146
	11.486	1.119	0.296371	0.009839
	11.39	1.797	0.293718	0.028579
	9.48	2.017	0.240928	0.034659
	11.78	1.345	0.304497	0.016086
	11.701	1.633	0.302313	0.024046
	9.949	1.102	0.25389	0.00937
	10.853	0.972	0.278876	0.005777
	9.073	1.401	0.229679	0.017634
	11.073	1.458	0.284956	0.019209
	11.22	1.113	0.289019	0.009674
	10.87	1.096	0.279346	0.009204
	10.881	1.463	0.27965	0.019347
	8.746	1.475	0.220641	0.019679
	8.096	1.712	0.202675	0.026229
	9.356	1.339	0.2375	0.01592
	9.881	1.401	0.252011	0.017634

## Sheet: Figure 5D
			Ratio
			0.313241
			0.201066
			0.096708
			0.182726
			0.168319
			0.191033
			0.193913
			0.138545
			0.143427
			0.193453
			0.254676
			0.140312
			0.206605
			0.157429
			0.198154
			0.139301
			0.179322
			0.148492
			0.240303
			0.185312
			0.143515
			0.182604
			0.191496
			0.190051
			0.14058
			0.142898
			0.177585
			0.134071
			0.239398
			0.132883
			0.159045
			0.167059
			0.163192
			0.199095
			0.169947
			0.189414
			0.229485
			0.211898
			0.206276
			0.142201
			0.129319
			0.166493
			0.136652
			0.109722
			0.105041
			0.191714
			0.16594
			0.145021
			0.1931
			0.165212
			0.179552
			0.168847
			0.209105
			0.244543
			0.152209
			0.192944
			0.212944
			0.170965
			0.1718
			0.140921
			0.150039
			0.14376
			0.17731
			0.198539
			0.126302
			0.215571
			0.167745
			0.193342
			0.128437
			0.157444
			0.141064
			0.194462
			0.101024
			0.197975
			0.223847
			0.207905
			0.246141
			0.205724
			0.189945
			0.197313
			0.163303
			0.133546
			0.160936
			0.147583
			0.253725
			0.230072
			0.309871
			0.22792
			0.130467
			0.141274
			0.169648
			0.237072
			0.135426
			0.251493
			0.173348
			0.247615
			0.183002
			0.188112
			0.257159
			0.167809
			0.220715
			0.183431
			0.253717
			0.180433
			0.174907
			0.161757
			0.235115
			0.194775
			0.174694
			0.201112
			0.173074
			0.200462
			0.261141
			0.21935
			0.236645
			0.193815
			0.181461
			0.154123
			0.219921
			0.216423
			0.160907
			0.172786
			0.222261
			0.192796
			0.134317
			0.202164
			0.193063
			0.179733
			0.211791
			0.129158
			0.176772
			0.198718
			0.167166
			0.167528
			0.222813
			0.158048
			0.197361
			0.266342
			0.214443
			0.251513
			0.130719
			0.203025
			0.133814
			0.188859
			0.136284
			0.172776
			0.118501
			0.150854
			0.237673
			0.161826
			0.145744
			0.137484
			0.201361
			0.191614
			0.129212
			0.16182
			0.131726
			0.177538
			0.171607
			0.183808
			0.141029
			0.209749
			0.117439
			0.150795
			0.196961
			0.304766
			0.175355
			0.120931
			0.201753
			0.231961
			0.171023
			0.171293
			0.190016
			0.146833
			0.15475
			0.227946
			0.159031
			0.226662
			0.191363
			0.170334
			0.194068
			0.146849
			0.221554
			0.129693
			0.159561
			0.130605
			0.13966
			0.097697
			0.129657
			0.107843
			0.156431
			0.150095
			0.180622
			0.086039
			0.155314
			0.101628
			0.124598
			0.094731
			0.181015
			0.159194
			0.129803
			0.126651
			0.19123
			0.193566
			0.171638
			0.091833
			0.157934
			0.156085
			0.121966
			0.115581
			0.146644
			0.153425
			0.147371
			0.131835
			0.135558
			0.092377
			0.138
			0.135979
			0.127157
			0.156098
			0.151352
			0.132407
			0.116736
			0.21306
			0.164732
			0.156159
			0.113604
			0.130239
			0.22282
			0.076743
			0.141353
			0.158416
			0.173063
			0.115561
			0.172529
			0.231252
			0.159513
			0.108733
			0.213866
			0.141688
			0.163107
			0.170523
			0.20367
			0.135508
			0.110188
			0.138501
			0.218721
			0.153613
			0.162067
			0.123374
			0.192443
			0.147852
			0.132087
			0.165306
			0.132202
			0.15602
			0.128145
			0.184881
			0.155803
			0.119562
			0.138307
			0.127686
			0.159502
			0.183035
			0.115874
			0.184394
			0.116293
			0.137441
			0.178716
			0.163299
			0.179738
			0.194404
			0.101499
			0.196755
			0.133877
			0.206855
			0.145967
			0.178335
			0.198687
			0.176413
			0.119076
			0.190652
			0.134668
			0.177518
			0.222969
			0.128014
			0.132263
			0.126382
			0.10206
			0.158449
			0.1428
			0.202597
			0.181213
			0.159854
			0.175123
			0.141862
			0.174618
			0.234882
			0.133203
			0.10986
			0.108617
			0.114377
			0.178352
			0.171585
			0.170506
			0.092746
			0.289028
			0.166217
			0.172743
			0.147782
			0.242837
			0.221211
			0.178083
			0.212798
			0.142597
			0.106726
			0.198093
			0.100465
			0.139533
			0.177923
			0.171494
			0.145638
			0.179649
			0.20135
			0.207768
			0.150284
			0.153621
			0.272818
			0.158847
			0.202834
			0.194307
			0.127828
			0.174548
			0.2042
			0.163089
			0.14283
			0.194191
			0.132539
			0.152418
			0.251004
			0.203091
			0.145551
			0.279891
			0.233337
			0.287124
			0.219573
			0.332305
			0.152583
			0.226166
			0.195927
			0.245398
			0.233651
			0.148353
			0.15543
			0.208913
			0.240038
			0.234998
			0.220247
			0.240609
			0.175846
			0.201274
			0.246795
			0.076357
			0.197853
			0.271275
			0.243668
			0.275485
			0.221372
			0.230261
			0.188827
			0.327182
			0.202815
			0.297199
			0.221748
			0.170864
			0.277248
			0.190117
			0.228545
			0.270224
			0.238547
			0.368009
			0.265917
			0.1575
			0.185036
			0.308152
			0.159198
			0.313962
			0.198735
			0.225216
			0.229611
			0.14574
			0.190227
			0.251445
			0.258999
			0.28655
			0.235698
			0.168507
			0.249853
			0.205358
			0.295272
			0.360553
			0.245261
			0.176998
			0.18008
			0.186434
			0.151267
			0.279963
			0.178526
			0.269053
			0.279958
			0.144777
			0.336991
			0.145416
			0.385247
			0.316372
			0.260305
			0.353231
			0.26262
			0.328296
			0.27145
			0.184607
			0.415365
			0.337223
			0.109725
			0.109141
			0.201551
			0.182993
			0.323753
			0.205908
			0.177981
			0.192358
			0.222249
			0.2917
			0.262691
			0.140975
			0.433029
			0.224422
			0.26102
			0.183281
			0.195483
			0.390446
			0.323952
			0.218933
			0.250366
			0.274671
			0.265667
			0.244559
			0.235673
			0.210268
			0.329857
			0.470183
			0.6006
			0.28135
			0.383622
			0.39168
			0.300659
			0.360523
			0.469162
			0.456669
			0.37717
			0.362328
			0.320276
			0.484739
			0.437919
			0.494617
			0.315113
			0.409994
			0.32564
			0.485095
			0.31812
			0.389154
			0.425808
			0.513305
			0.519733
			0.347723
			0.709992
			0.593103
			0.498338
			0.590185
			0.260321
			0.383188
			0.270119
			0.36021
			0.410483
			0.396692
			0.274167
			0.308715
			0.276294
			0.560604
			0.266046
			0.265258
			0.265627
			0.428434
			0.209757
			0.375718
			0.340565
			0.427937
			0.532574
			0.273606
			0.430515
			0.633115
			0.53166
			0.640401
			1.15738
			0.547732
			0.91863
			0.671745
			0.510878
			0.47731
			0.561707
			0.668715
			0.646408
			0.682136
			0.990136
			0.966021
			0.62384
			0.705358
			0.725944
			0.764035
			0.934292
			0.78745
			0.941998
			1.016
			1.27993
			0.941427
			1.24938
			0.80297
			0.753333
			0.989075
			0.797332
			0.897213
			0.484164
			0.78803
			1.00709
			0.733283
			0.979922
			0.496028
			1.03448
			0.434257
			0.702188
			0.658034
			0.79081
			0.711969
			0.38743
			0.743089
			0.77038
			1.20795
			0.677059
			0.786296
			0.7713
			0.710459
			0.639356
			0.583415
			0.512175
			0.448449
			0.599392
			0.781116
			1.17701
			0.914033
			0.868431
			1.0026
			0.882499
			0.88883
			1.35145
			0.790441
			0.721344
			0.972412
			0.83728
			0.85589
			1.21236
			0.885469
			1.3361
			0.904218
			0.986525
			0.760597
			0.896463
			0.805416
			0.760713
			0.889965
			0.962256
			1.02177
			0.83189
			0.673954
			0.745915
			0.756178
			0.637916
			1.05889
			0.946399
			0.941232
			0.974715
			0.869555
			1.06009
			0.860873
			0.914826
			1.20987
			1.21951
			1.12476
			0.85886
			1.06934
			0.940731
			0.82583
			0.991183
			1.1297
			0.951695
			1.14519
			1.18321
			0.976724
			1.27404
			1.01564
			1.17154
			1.38146
			1.55863
			1.19346
			1.22388
			1.56955
			1.59622
			1.44034
			1.23922
			1.22044
			1.30267
			1.14234
			1.40424
			1.69987
			1.22494
			1.2471
			1.3916
			1.03631
			1.16075
			1.21576
			1.77076
			1.15856
			1.59255
			1.36338
			1.53581
			1.35127
			1.5413
			1.51517
			1.59303
			1.27721
			1.82417
			1.43105
			1.47365
			1.18545
			1.76085
			1.59365
			1.91403
			1.54145
			1.20215
			1.39512
			1.42834
			1.33651
			1.38277
			1.21591
			1.76752
			1.12248
			1.516
			1.26795
			1.52094
			1.39201
			1.27259
			1.26581
			1.18827
			1.24534
			1.68441
			1.34739
			1.58901
			1.70505
			1.24518
			1.25147
			1.25941
			1.589
			1.2937
			1.23277
			1.22663
			1.46096
			1.67093
			1.13497
			1.54672
			1.2841
			1.52757
			1.24728
			1.3983
			1.63958
			1.34478
			1.30423
			1.38075
			1.5653
			1.48331
			1.71915
			1.81606
			1.51241
			1.3838
			1.68048
			1.44996
			1.81509
			1.26718
			1.44861
			1.30512
			1.51252
			1.40569
			1.19514
			1.89629
			1.42371
			1.65254
			1.56769
			1.41417
			1.40642
			1.84522
			1.38228
			1.75732
			1.60979
			1.38478
			1.49662
			1.53016
			1.61077
			1.39546
			1.4165
			1.47027
			1.50335
			1.22964
			1.24485
			1.17999
			1.47631
			1.35789
			1.41885
			1.77752
			1.50636
			1.78317
			1.40587
			1.3976
			1.30802
			1.48703
			1.58894
			1.72728
			0.987381
			1.48003
			1.45031
			1.53939
			1.92722
			1.28028
			1.3506
			1.59057
			1.65692
			1.51184
			1.38156
			1.61553
			1.34949
			1.44365
			1.50364
			1.53844
			1.47975
			1.52389
			1.58512
			1.51582
			1.62981
			1.6932
			1.67095
			1.62636
			1.55316
			1.733
			1.49788
			1.65899
			1.52633
			1.71627
			1.45673
			1.48027
			1.50778
			1.5389
			1.48959
			1.54801
			1.62146
			1.42144
			1.45549
			1.48912
			1.47575
			1.41919
			1.7573
			1.6484
			1.33296
			1.43601
			1.5305
			1.42408
			1.74573
			1.78923
			1.70889
			1.50535
			1.68575
			1.60637
			1.79697
			1.44611
			1.32118
			1.769
			1.86328
			1.20676
			1.67999
			1.5565
			1.70944
			1.69744
			1.7494
			1.68021
			1.87386
			1.62369
			1.57857
			1.74224
			1.53714
			1.75045
			1.53149
			1.42043
			1.70541
			1.44649
			1.37414
			1.78964
			1.36306
			1.74904
			1.57291
			1.58195
			1.61267
			1.34616
			1.67065
			1.75908
			1.37157
			1.9429
			1.48766
			1.66307
			1.51211
			1.37924
			1.38374
			1.60015
			1.43498
			1.72019
			1.51824
			1.79712
			1.35972
			1.38976
			1.61318
			1.60573
			1.66991
			1.68212
			1.59191
			1.45558
			1.653
			1.83457
			1.82967
			1.42632
			1.67254
			1.60247
			1.58514
			1.53914
			1.24854
			1.28844
			1.60536
			1.37694
			1.67711
			1.39418
			1.16797
			1.37476
			1.50552
			1.62788
			1.87025
			1.65659
			1.3907
			1.35657
			1.57202
			1.35179
			1.34442
			2.22206
			1.62641
			1.87316
			1.54025
			1.42777
			1.85073
			1.63007
			1.44921
			1.5744
			1.32266
			1.60616
			1.36256
			1.64297
			1.41735
			1.70351
			1.79036
			1.6382
			1.77919
			1.33848
			1.58771
			1.7098
			1.73491
			1.69199
			1.49494
			1.52255
			1.71896
			1.23461
			1.42692
			1.58503
			1.93213
			1.50637
			1.7091
			1.7137
			1.89423
			1.93467
			1.91179
			1.46707
			1.73256
			1.32712
			1.81111
			1.61043
			1.36814
			1.7215
			1.74713
			1.40913
			1.56702
			1.89451
			1.39041
			1.99738
			1.2805
			1.7447
			1.9338
			1.96908
			1.50087
			1.60164
			1.57683
			1.31643
			1.45161
			1.67577
			1.6588
			1.4859
			1.5823
			1.67084
			1.69424
			1.38884
			1.67953
			1.71705
			1.5344
			1.59745
			1.87001
			1.87584
			1.54066
			1.67279
			1.57006
			1.32403
			1.57151
			1.42804
			1.8102
			1.59303
			1.70836
			1.39069
			1.55028
			1.40513
			1.37637
			1.52479
			1.54515
			1.68237
			1.67199
			1.81848
			1.53161
			1.15662
			1.62529
			1.59414
			1.27516
			1.76147
			1.86445
			1.72144
			1.54473
			1.81496
			1.58608
			1.66886
			1.54334
			1.84483
			1.33434
			1.15886
			1.80638
			1.86299
			1.58387
			1.67311
			1.29035
			1.3242
			1.57441
			1.36285
			1.46328
			1.63692
			1.62578
			1.70567
			1.62714
			1.63854
			1.39946
			1.59389
			1.57011
			1.62409
			1.74045
			1.45009
			1.41636
			1.66046
			1.64203
			1.45456
			1.46098
			1.80747
			1.63224
			2.00453
			1.46601
			1.40384
			1.41461
			1.48517
			1.36733
			1.58711
			1.61632
			1.38865
			1.38642
			1.37759
			1.44555
			1.59566
			1.50395
			1.49515
			1.40742
			1.52654
			1.43931
			1.68249
			1.92091
			1.72844
			1.41783
			1.61093
			1.69601
			1.64201
			1.61955
			1.65138
			1.74588
			1.87103
			1.66505
			1.43127
			1.44316
			1.71599
			1.6178
			1.35467
			1.65073
			1.51011
			1.75208
			1.86107
			1.6977
			1.67383
			1.72174
			1.54664
			1.7306
			1.55763
			1.3753
			1.5368
			1.70649
			1.86702
			1.49084
			1.60891
			1.55126
			1.81405
			1.78472
			1.56636
			1.70761
			1.51271
			1.57
			1.47936
			1.72949
			1.64135
			1.81438
			1.70184
			2.01829
			1.64908
			1.67115
			1.69228
			1.72694
			1.75927
			2.33293
			1.55329
			2.14342
			1.97977
			1.67662
			1.55096
			1.5533
			1.52324
			1.76593
			1.48534
			1.70908
			2.15146
			1.97121
			1.61835
			1.68081
			1.92609
			1.30733
			1.51106
			1.67626
			2.04724
			1.34847
			1.83882
			1.62355
			1.65946
			1.71669
			1.55965
			1.80497
			1.59846
			1.67917
			1.45352
			1.69579
			1.94578
			1.67016
			1.5319
			1.90735
			1.29076
			1.92865
			1.51255
			1.51606
			1.894
			1.51315
			1.56281
			1.40262
			1.68321
			1.65807
			1.43777
			1.59731
			1.68534
			1.57683
			1.57756
			1.62294
			1.73104
			1.86964
			2.09736
			1.55084
			2
			2.01053
			1.62016
			1.56282
			1.78242
			1.70722
			1.73459
			1.36996
			1.66458
			1.5204
			1.54589
			1.72209
			1.5142
			1.517
			1.86963

## Sheet: Figure 5E
	Raw intensity		Normalized intensity
	eater-dsRed	dome-MESO-GFP	eater-dsRed	dome-MESO-GFP
	58.48	52.497	0.738819	0.624666
	60.418	52.458	0.775796	0.623922
	59.672	52.672	0.761562	0.628005
	57.407	50.096	0.718347	0.578856
	61.226	54.249	0.791212	0.658094
	62.311	53.706	0.811913	0.647733
	58.401	53.316	0.737312	0.640292
	61.859	57.542	0.803289	0.720923
	64.062	54.011	0.845322	0.653553
	64.215	55.062	0.848241	0.673605
	62.802	53.028	0.821281	0.634797
	67.379	57.011	0.908609	0.710791
	63.379	53.35	0.83229	0.640941
	65.158	54.847	0.866233	0.669503
	58.26	50.379	0.734622	0.584256
	62.486	54.864	0.815252	0.669828
	59.802	51.859	0.764043	0.612493
	60.418	55.102	0.775796	0.674368
	60.91	50.582	0.785183	0.588129
	63.859	54.853	0.841449	0.669618
	64.384	54.232	0.851465	0.657769
	64.124	54.198	0.846505	0.657121
	63.588	54.136	0.836278	0.655938
	58.684	51.638	0.742712	0.608277
	58.299	50.638	0.735366	0.589197
	62.096	54.107	0.807811	0.655384
	64.446	56.045	0.852648	0.692361
	60.785	52.864	0.782798	0.631668
	60.989	55.412	0.78669	0.680283
	61.237	50.831	0.791422	0.592879
	63.333	50.751	0.831413	0.591353
	57.463	53.339	0.719415	0.640731
	63.051	52.87	0.826032	0.631783
	60.136	47.469	0.770415	0.528734
	56.576	51.441	0.702492	0.604518
	60.056	52.452	0.768889	0.623808
	58.904	51.802	0.746909	0.611406
	58.096	51.497	0.731493	0.605587
	57.932	52.898	0.728364	0.632317
	63.718	54.181	0.838758	0.656796
	56.814	49.893	0.707033	0.574983
	60.04	53.311	0.768584	0.640197
	61.797	53.633	0.802106	0.646341
	58.085	52.254	0.731283	0.62003
	57.525	52.927	0.720598	0.63287
	63.463	50.322	0.833893	0.583168
	60.181	50.836	0.771274	0.592975
	62.441	50.537	0.814394	0.58727
	57.74	51.898	0.7247	0.613237
	57.599	51.136	0.72201	0.598699
	54.791	50.102	0.668435	0.57897
	53.407	46.288	0.642029	0.506201
	52.938	47.056	0.63308	0.520854
	53.271	48.638	0.639434	0.551038
	57.921	51.701	0.728154	0.609479
	59.52	50.537	0.758662	0.58727
	56.655	51.124	0.703999	0.59847
	57.102	50.192	0.712528	0.580688
	63.13	52.814	0.827539	0.630714
	61.667	52.712	0.799626	0.628768
	60.469	51.237	0.776769	0.600626
	60.435	51.655	0.77612	0.608601
	60.977	53.729	0.786461	0.648172
	60.842	51.164	0.783885	0.599233
	60.808	48.893	0.783237	0.555903
	62.994	52.249	0.824945	0.619934
	63.096	52.972	0.826891	0.633729
	58.384	51.339	0.736988	0.602572
	64.294	55.876	0.849748	0.689136
	57.531	51.39	0.720713	0.603545
	61.825	52.904	0.802641	0.632432
	62.469	52.034	0.814928	0.615832
	63.209	55.893	0.829047	0.68946
	65.124	54.424	0.865584	0.661432
	60.356	51.718	0.774613	0.609803
	61.096	51.61	0.788732	0.607743
	61.831	54.638	0.802755	0.665516
	62.249	51.023	0.81073	0.596543
	62.04	53.441	0.806743	0.642677
	66.96	55.831	0.900614	0.688277
	65.011	54.983	0.863428	0.672098
	62.062	57.633	0.807162	0.722659
	56.395	49.441	0.699038	0.566359
	60.893	54.339	0.784858	0.659811
	61.571	55.475	0.797794	0.681485
	57.407	51.023	0.718347	0.596543
	55.537	54.605	0.682668	0.664886
	55.345	50.147	0.679005	0.579829
	55.458	50.797	0.681161	0.592231
	61.299	52.989	0.792605	0.634053
	61.316	54.836	0.792929	0.669293
	59.825	50.712	0.764481	0.590609
	61.26	53.605	0.791861	0.645806
	61.746	54.684	0.801133	0.666393
	61.463	53.237	0.795734	0.638785
	58.802	53.469	0.744963	0.643211
	60.864	56.226	0.784305	0.695814
	64.847	55.927	0.860299	0.690109
	61.751	53.554	0.801229	0.644833
	64.373	55.367	0.851255	0.679425
	60.215	55.124	0.771922	0.674788
	62.401	55.966	0.81363	0.690853
	65.288	55.689	0.868713	0.685568
	64.734	54.836	0.858143	0.669293
	68.944	55.87	0.938468	0.689022
	66.435	54.073	0.890598	0.654736
	62.35	54.322	0.812657	0.659486
	60.644	52.571	0.780108	0.626078
	57.989	49.791	0.729451	0.573037
	63.113	52.04	0.827215	0.615947
	62.966	52.723	0.82441	0.628978
	65.181	55.034	0.866672	0.673071
	63.938	56.356	0.842956	0.698294
	63.814	56.701	0.84059	0.704877
	62.565	54.39	0.81676	0.660784
	65.226	56.322	0.86753	0.697646
	62.175	53.395	0.809318	0.6418
	64.672	59.215	0.85696	0.752843
	65.158	51.977	0.866233	0.614745
	61.977	54.232	0.805541	0.657769
	62.87	55.04	0.822579	0.673186
	66.91	54.271	0.89966	0.658513
	59.797	51.689	0.763947	0.60925
	60.158	54.802	0.770835	0.668645
	56.023	55.655	0.691941	0.684919
	63.294	53.904	0.830669	0.651511
	64.339	56.311	0.850607	0.697436
	57.65	54.955	0.722983	0.671564
	61.853	53.972	0.803175	0.652809
	63.418	50.819	0.833034	0.592651
	64.04	53.356	0.844902	0.641055
	65.814	55.102	0.878749	0.674368
	64.633	55.379	0.856216	0.679654
	61.531	53.52	0.797031	0.644185
	61.74	53.203	0.801019	0.638136
	62.927	51.599	0.823666	0.607533
	61.249	53.175	0.791651	0.637602
	62.243	55.486	0.810616	0.681695
	65.119	55.605	0.865489	0.683966
	63.966	54.277	0.84349	0.658628
	66.78	55.757	0.89718	0.686866
	65.062	53.74	0.864401	0.648382
	62.814	53.22	0.82151	0.638461
	65.785	54.667	0.878196	0.666069
	67.407	55.983	0.909143	0.691178
	60.65	55.701	0.780222	0.685797
	60.367	52.39	0.774823	0.622625
	60.74	51.282	0.781939	0.601484
	58.373	51.887	0.736778	0.613028
	65.52	55.746	0.87314	0.686656
	63.881	54.299	0.841868	0.659048
	60.949	51.593	0.785927	0.607418
	64.282	54.412	0.849519	0.661204
	64.136	54.237	0.846734	0.657865
	64.938	55.412	0.862035	0.680283
	64.808	53.282	0.859555	0.639644
	59.944	52.571	0.766752	0.626078
	64.475	52.718	0.853202	0.628883
	66.729	58.136	0.896207	0.732256
	68.48	57.983	0.929615	0.729337
	65.412	54.435	0.871079	0.661642
	61.955	56.548	0.805121	0.701958
	59.87	53.175	0.76534	0.637602
	64.492	51.384	0.853526	0.603431
	67.531	54.966	0.911509	0.671774
	63.65	54.989	0.837461	0.672212
	69.802	57.079	0.954839	0.712089
	62.22	57.209	0.810177	0.714569
	63.503	50.927	0.834656	0.594711
	61.35	50.672	0.793578	0.589846
	62.847	53.814	0.82214	0.649794
	62.514	53.802	0.815786	0.649565
	61.684	55.288	0.79995	0.677917
	64.599	56.113	0.855567	0.693658
	65.621	56.644	0.875067	0.703789
	64.734	57.554	0.858143	0.721152
	60.198	54.48	0.771598	0.662501
	61.158	52.785	0.789915	0.630161
	55.35	51.661	0.6791	0.608716
	64.028	54.023	0.844673	0.653782
	61.48	55.299	0.796058	0.678127
	66.678	58.243	0.895234	0.734297
	62.514	54.282	0.815786	0.658723
	61.746	53.972	0.801133	0.652809
	65.011	56.876	0.863428	0.708216
	64.734	56.316	0.858143	0.697531
	66.621	54.26	0.894146	0.658303
	62.458	55.169	0.814718	0.675647
	66.977	54.994	0.900939	0.672308
	62.141	56.362	0.80867	0.698409
	65.48	56.887	0.872377	0.708426
	68.147	55.949	0.923262	0.690529
	63.085	52.667	0.826681	0.62791
	66.39	53.452	0.889739	0.642887
	63.424	56.367	0.833149	0.698504
	63.667	50.706	0.837785	0.590495
	67.266	57.322	0.906453	0.716725
	66.548	55.893	0.892754	0.68946
	68.774	55.339	0.935225	0.67889
	69.062	55.983	0.94072	0.691178
	68.429	55.508	0.928642	0.682115
	62.768	53.718	0.820633	0.647962
	65.808	58.068	0.878635	0.730959
	64.119	56.994	0.846409	0.710467
	61.107	53.316	0.788941	0.640292
	67.61	53.689	0.913016	0.647409
	66.017	57.305	0.882622	0.716401
	67.299	53.503	0.907082	0.64386
	64.565	57.723	0.854919	0.724376
	63.497	53.763	0.834542	0.648821
	68.644	54.531	0.932744	0.663474
	65.938	56.322	0.881115	0.697646
	65.237	55.424	0.86774	0.680512
	65.452	50.701	0.871842	0.590399
	65.028	52.655	0.863753	0.627681
	66.966	56.983	0.900729	0.710257
	61.718	55.78	0.800599	0.687304
	65.548	54.39	0.873674	0.660784
	61.294	50.548	0.792509	0.58748
	69.831	55.689	0.955392	0.685568
	64.141	57.446	0.846829	0.719091
	65.35	55.525	0.869896	0.682439
	63.107	54.339	0.827101	0.659811
	62.316	54.407	0.812009	0.661108
	66.751	56.356	0.896627	0.698294
	66.921	54.949	0.89987	0.671449
	66.853	57.079	0.898573	0.712089
	66.746	55.362	0.896531	0.679329
	64.712	55.068	0.857723	0.67372
	64.48	53.266	0.853297	0.639338
	63.712	56.282	0.838644	0.696882
	63.266	52.107	0.830134	0.617225
	64.243	53.102	0.848775	0.636209
	65.898	55.079	0.880352	0.67393
	66.373	54.271	0.889415	0.658513
	64.791	50.96	0.859231	0.595341
	65.39	57.514	0.870659	0.720388
	69.887	58.689	0.95646	0.742807
	64.198	52.994	0.847917	0.634149
	67.136	57.209	0.903972	0.714569
	65.452	52.328	0.871842	0.621442
	67.35	52.469	0.908055	0.624132
	64.842	55.938	0.860204	0.690319
	64.311	53.864	0.850073	0.650748
	65.373	53.288	0.870335	0.639758
	60.797	51.718	0.783027	0.609803
	67.062	55.429	0.90256	0.680607
	62.746	50.898	0.820213	0.594158
	62.441	52.249	0.814394	0.619934
	68.977	54.633	0.939098	0.66542
	63.633	52.305	0.837137	0.621003
	67.102	52.588	0.903324	0.626402
	66.864	53.424	0.898783	0.642353
	66.667	54.565	0.895024	0.664123
	61.983	54.085	0.805655	0.654965
	64.497	52.226	0.853621	0.619496
	65.051	53.13	0.864191	0.636743
	65.028	51.288	0.863753	0.601599
	63.096	53.35	0.826891	0.640941
	66.492	51.949	0.891685	0.61421
	61.655	51.638	0.799397	0.608277
	66.695	53.876	0.895558	0.650977
	64.463	50.972	0.852973	0.59557
	64.989	50.492	0.863008	0.586412
	63.458	47.644	0.833798	0.532073
	60.311	49.113	0.773754	0.560101
	64.158	52.124	0.847153	0.617549
	62.079	52.192	0.807487	0.618847
	66.35	51.39	0.888976	0.603545
	60.989	52.232	0.78669	0.61961
	63.508	52.734	0.834752	0.629188
	66.379	54.384	0.889529	0.660669
	66.017	51.701	0.882622	0.609479
	62.305	51.141	0.811799	0.598794
	64.831	50.446	0.859994	0.585534
	60.802	51.655	0.783122	0.608601
	58.831	52.757	0.745516	0.629627
	62.723	51.52	0.819774	0.606025
	58.757	51.311	0.744104	0.602038
	61.712	51.678	0.800485	0.60904
	60.627	47.559	0.779783	0.530451
	58.362	46.215	0.736568	0.504808
	61.04	46.932	0.787663	0.518488
	58.282	51.102	0.735042	0.59805
	58.446	49.056	0.738171	0.559013
	61.028	50.056	0.787434	0.578093
	57.028	46.435	0.711116	0.509006
	61.107	47.904	0.788941	0.537034
	58.955	48.729	0.747882	0.552774
	59.525	49.017	0.758758	0.558269
	62.785	52.734	0.820957	0.629188
	62.215	48.678	0.810082	0.551801
	61.209	48.017	0.790888	0.539189
	60.339	52.582	0.774288	0.626288
	62.751	46.893	0.820308	0.517744
	60.068	51.209	0.769118	0.600092
	63.977	53.011	0.8437	0.634473
	62.751	51.254	0.820308	0.60095
	64.508	50.65	0.853831	0.589426
	61.774	51.966	0.801668	0.614535
	60.678	49.814	0.780756	0.573476
	64.684	52.492	0.857189	0.624571
	64.249	49.819	0.84889	0.573571
	59.927	51.836	0.766428	0.612054
	62.65	49.045	0.818381	0.558803
	66.599	50.599	0.893727	0.588453
	62.011	49.876	0.806189	0.574658
	59.977	49.74	0.767382	0.572064
	63.554	51.153	0.835629	0.599023
	59.435	48.458	0.75704	0.547604
	65.316	53.576	0.869248	0.645253
	67.503	51.791	0.910975	0.611196
	66.695	49.503	0.895558	0.567542
	67.333	52.531	0.907731	0.625315
	65.898	51.469	0.880352	0.605052
	65.418	48.35	0.871194	0.545543
	65.429	50.311	0.871403	0.582958
	67.362	50.486	0.908284	0.586297
	63.475	52.582	0.834122	0.626288
	62.537	48.921	0.816225	0.556437
	69.107	52.322	0.941578	0.621327
	63.61	54.441	0.836698	0.661757
	67.61	52.847	0.913016	0.631344
	64.932	51.65	0.861921	0.608506
	66.373	49.729	0.889415	0.571854
	65.345	52.701	0.869801	0.628558
	68.13	52.22	0.922937	0.619381
	69.802	52.627	0.954839	0.627146
	69.486	52.435	0.948809	0.623483
	66.774	50.757	0.897066	0.591468
	70.079	54.136	0.960124	0.655938
	63.249	50.542	0.82981	0.587365
	69.446	53.079	0.948046	0.63577
	65.311	48.989	0.869152	0.557735
	62.463	48.034	0.814813	0.539514
	64.305	49.819	0.849958	0.573571
	63.927	48.718	0.842746	0.552564
	68.277	51.124	0.925742	0.59847
	70.119	53.412	0.960887	0.642124
	67.017	50.989	0.901702	0.595894
	68.073	50.266	0.92185	0.5821
	62.407	47.667	0.813745	0.532512
	58.797	47.644	0.744868	0.532073
	66.644	49.345	0.894585	0.564527
	66.073	50.458	0.883691	0.585763
	63.249	48.966	0.82981	0.557296
	65.102	51.26	0.865164	0.601065
	65.345	52.548	0.869801	0.625639
	64.729	54.655	0.858048	0.66584
	63.181	50.362	0.828513	0.583931
	65.305	50.627	0.869038	0.588987
	66.023	49.938	0.882737	0.575841
	66.729	47.299	0.896207	0.52549
	54.91	42.412	0.670705	0.432248
	62.299	50.989	0.811684	0.595894
	65.65	51.994	0.87562	0.615069
	65.695	50.853	0.876479	0.593299
	60.949	45.808	0.785927	0.497043
	64.746	48.107	0.858372	0.540907
	61.096	48.186	0.788732	0.542414
	67.345	53.237	0.90796	0.638785
	63.35	52.034	0.831737	0.615832
	68.333	52.723	0.926811	0.628978
	63.345	49.136	0.831642	0.56054
	65.107	52.932	0.86526	0.632966
	66.051	49.757	0.883271	0.572388
	69.605	52.407	0.95108	0.622949
	63.91	51.542	0.842422	0.606445
	68.028	48.853	0.920991	0.55514
	65.814	49.525	0.878749	0.567962
	69.362	50.085	0.946444	0.578646
	65.621	52.401	0.875067	0.622834
	69.418	49.435	0.947512	0.566244
	63.672	50.153	0.837881	0.579944
	62.661	50.492	0.818591	0.586412
	65.424	51.362	0.871308	0.603011
	71.198	50.429	0.981474	0.585209
	70.763	51.254	0.973174	0.60095
	61.808	47.294	0.802316	0.525395
	64.712	51.531	0.857723	0.606235
	64.288	52.78	0.849634	0.630066
	67.249	47.898	0.906128	0.536919
	67.864	49.373	0.917862	0.565061
	68.808	51.576	0.935873	0.607094
	67.599	49.65	0.912806	0.570346
	64.887	49.605	0.861062	0.569488
	63.938	51.525	0.842956	0.606121
	69.638	51.102	0.95171	0.59805
	69.503	51.254	0.949134	0.60095
	64.831	49.497	0.859994	0.567427
	63.825	48.621	0.8408	0.550714
	67.062	50.186	0.90256	0.580573
	62.13	50.853	0.80846	0.593299
	62.508	48.469	0.815672	0.547813
	66.441	52.638	0.890712	0.627356
	68.198	50.497	0.924235	0.586507
	69.548	50.339	0.949992	0.583492
	63.684	50.667	0.83811	0.58975
	65.638	49.034	0.875391	0.558593
	64.87	50.701	0.860738	0.590399
	67.588	50.322	0.912596	0.583168
	63.757	49.938	0.839502	0.575841
	62.028	47.695	0.806514	0.533046
	66.576	48.876	0.893288	0.555579
	65.791	50.328	0.87831	0.583282
	64.627	50.311	0.856102	0.582958
	63.068	50.073	0.826357	0.578417
	64.011	46.395	0.844349	0.508242
	64.757	49.277	0.858582	0.56323
	68.141	50.254	0.923147	0.581871
	65.119	47.966	0.865489	0.538216
	62.35	48.158	0.812657	0.54188
	62.243	48.633	0.810616	0.550943
	62.876	51.102	0.822693	0.59805
	65.616	51.723	0.874971	0.609898
	65.718	49.627	0.876917	0.569908
	67.842	49.164	0.917443	0.561074
	63.271	48	0.83023	0.538865
	68.712	47.503	0.934042	0.529383
	65.079	50.266	0.864726	0.5821
	64.689	49.136	0.857285	0.56054
	66.514	48.181	0.892105	0.542319
	67.006	47.571	0.901492	0.53068
	67.102	53.073	0.903324	0.635656
	65.446	48.938	0.871728	0.556762
	66.74	49.61	0.896417	0.569583
	69.593	47.864	0.950851	0.53627
	66.503	51.695	0.891895	0.609364
	64.316	48.718	0.850168	0.552564
	65.147	48.571	0.866023	0.54976
	62.232	47.458	0.810406	0.528524
	66.203	52.034	0.886171	0.615832
	61.203	46.09	0.790773	0.502423
	62.859	49.322	0.822369	0.564088
	62.322	50.655	0.812123	0.589521
	65.638	50	0.875391	0.577024
	62.153	44.113	0.808899	0.464703
	67.983	48.774	0.920133	0.553633
	66.469	50.328	0.891246	0.583282
	62.746	48.542	0.820213	0.549206
	64.661	48.339	0.85675	0.545333
	69.864	48.853	0.956022	0.55514
	65.288	49.452	0.868713	0.566569
	64.254	48.864	0.848985	0.55535
	67.74	48.39	0.915496	0.546306
	58.446	44.559	0.738171	0.473212
	62.056	48.729	0.807048	0.552774
	65.616	50.203	0.874971	0.580898
	64.989	48.661	0.863008	0.551477
	67.938	50.627	0.919274	0.588987
	64.565	46.04	0.854919	0.501469
	69.294	49.497	0.945146	0.567427
	65.09	49.825	0.864936	0.573685
	63.949	47.469	0.843166	0.528734
	63.751	49.791	0.839388	0.573037
	66.407	51.684	0.890063	0.609154
	67.52	49	0.911299	0.557945
	58.938	47.164	0.747558	0.522915
	65.757	49.147	0.877662	0.560749
	66.13	47.893	0.884778	0.536824
	67.22	50.277	0.905575	0.582309
	58.203	44.718	0.733534	0.476246
	63.887	47.412	0.841983	0.527646
	59.565	43.299	0.759521	0.449172
	64.836	48.006	0.860089	0.53898
	65.254	47	0.868065	0.519786
	59.503	49.175	0.758338	0.561284
	62.322	48.356	0.812123	0.545657
	65.249	45.175	0.867969	0.484965
	60.842	47.814	0.783885	0.535316
	58.571	49.102	0.740556	0.559891
	62.316	45.983	0.812009	0.500382
	63.175	47.107	0.828398	0.521827
	63.757	48.401	0.839502	0.546516
	61.768	49.203	0.801553	0.561818
	66.486	47.938	0.891571	0.537682
	65.395	49.028	0.870755	0.558479
	64.893	47.898	0.861177	0.536919
	67.644	46.514	0.913665	0.510513
	63.78	48.983	0.839941	0.55762
	64.006	49.379	0.844253	0.565176
	66.435	46.316	0.890598	0.506735
	61.831	47.192	0.802755	0.523449
	60.548	47.706	0.778276	0.533256
	62.751	48.831	0.820308	0.55472
	63.384	49.989	0.832386	0.576814
	63.503	49.26	0.834656	0.562905
	61.667	45.932	0.799626	0.499409
	63.288	49.701	0.830554	0.57132
	60.989	43.994	0.78669	0.462432
	62.339	46.056	0.812448	0.501774
	62.407	47.661	0.813745	0.532397
	64.164	45.379	0.847268	0.488858
	66.48	47.695	0.891456	0.533046
	62.638	46.486	0.818152	0.509979
	64.328	49.068	0.850397	0.559242
	63.198	45.52	0.828837	0.491548
	60.672	44.718	0.780642	0.476246
	64.362	48.085	0.851046	0.540487
	60.667	43.034	0.780546	0.444116
	59.695	45.379	0.762001	0.488858
	61.48	44.706	0.796058	0.476017
	61.723	46.458	0.800694	0.509444
	60.785	45.39	0.782798	0.489067
	61.113	50.096	0.789056	0.578856
	60.175	46.322	0.771159	0.50685
	61.949	43.13	0.805006	0.445947
	66.186	49.87	0.885847	0.574544
	65.096	48.627	0.86505	0.550828
	66.463	48.91	0.891132	0.556228
	64.463	48.915	0.852973	0.556323
	67.299	48.621	0.907082	0.550714
	61.26	46.576	0.791861	0.511696
	60.339	46.028	0.774288	0.50124
	65.243	49.147	0.867855	0.560749
	62.876	46.367	0.822693	0.507708
	59.463	44.249	0.757575	0.467298
	64.226	46.463	0.848451	0.50954
	60.842	43.311	0.783885	0.449401
	57.503	44.13	0.720179	0.465027
	64.011	49.876	0.844349	0.574658
	60.847	46.768	0.783981	0.515359
	60.373	44.254	0.774937	0.467393
	59.921	45.554	0.766313	0.492196
	62.932	46.424	0.823762	0.508796
	60.729	47.056	0.781729	0.520854
	62.757	46.565	0.820423	0.511486
	63.921	47.407	0.842631	0.527551
	60.367	47.797	0.774823	0.534992
	63.814	49.147	0.84059	0.560749
	60.605	45.085	0.779364	0.483248
	61.91	45.932	0.804262	0.499409
	63.819	46.565	0.840685	0.511486
	59.147	42.831	0.751545	0.440243
	58.887	44.927	0.746585	0.480234
	59.831	45.593	0.764596	0.492941
	62.746	44.023	0.820213	0.462986
	64	46.486	0.844139	0.509979
	64.559	46.638	0.854804	0.512879
	60.35	45.034	0.774498	0.482275
	65.864	49.898	0.879703	0.575078
	64.158	47.87	0.847153	0.536385
	63.198	47.045	0.828837	0.520644
	65.785	47.22	0.878196	0.523983
	60.119	45.876	0.770091	0.49834
	63.74	45.52	0.839178	0.491548
	66.277	50.124	0.887583	0.57939
	65.593	47.605	0.874533	0.531329
	60.746	44.537	0.782054	0.472792
	66.073	48.751	0.883691	0.553194
	66.492	49.446	0.891685	0.566454
	65.729	46.09	0.877127	0.502423
	65.418	46.831	0.871194	0.516561
	63.04	45.78	0.825822	0.496508
	62.311	48.497	0.811913	0.548348
	64.26	46.712	0.849099	0.514291
	68.13	47.638	0.922937	0.531958
	62.571	44.542	0.816874	0.472888
	65.203	50.548	0.867092	0.58748
	64.887	48.582	0.861062	0.549969
	66.599	47.638	0.893727	0.531958
	67.508	47.203	0.91107	0.523659
	66.068	48.983	0.883595	0.55762
	65.203	43.819	0.867092	0.459093
	65.401	49.898	0.870869	0.575078
	64.548	46.198	0.854594	0.504484
	60.271	49.328	0.772991	0.564203
	66.322	47.701	0.888442	0.53316
	65.932	48.373	0.881001	0.545982
	64.565	44.277	0.854919	0.467832
	58.373	45.893	0.736778	0.498664
	62.102	46.475	0.807926	0.509769
	63.898	45.983	0.842193	0.500382
	67.294	47.966	0.906987	0.538216
	63.469	49.638	0.834007	0.570118
	66.124	47.458	0.884664	0.528524
	62.853	46.181	0.822254	0.504159
	60.599	45.712	0.779249	0.495211
	67.051	48.537	0.902351	0.549111
	65.288	47.203	0.868713	0.523659
	62.107	44.548	0.808021	0.473002
	64.644	47.119	0.856426	0.522056
	65.113	44.006	0.865374	0.462661
	65.266	47.051	0.868294	0.520759
	62.582	49.023	0.817084	0.558384
	62.09	45.853	0.807697	0.497901
	62.186	46.153	0.809528	0.503625
	63.576	47.87	0.836049	0.536385
	67.87	46.695	0.917977	0.513966
	64.746	45.441	0.858372	0.49004
	63.441	46.949	0.833473	0.518812
	65.774	47.243	0.877986	0.524422
	68.305	47.734	0.926276	0.53379
	63.023	45.209	0.825498	0.485614
	60.429	45.085	0.776005	0.483248
	60.282	46.469	0.773201	0.509654
	64.944	46.61	0.86215	0.512345
	64.994	49.898	0.863104	0.575078
	65.983	45.542	0.881974	0.491967
	61.983	48.271	0.805655	0.544036
	61.452	44.718	0.795524	0.476246
	66.266	47.469	0.887373	0.528734
	68.113	48.068	0.922613	0.540163
	60.305	45.401	0.77364	0.489277
	66.424	48.452	0.890388	0.547489
	64.689	49.288	0.857285	0.56344
	62.446	47.842	0.814489	0.535851
	64.695	46.559	0.857399	0.511371
	70.294	48.124	0.964226	0.541231
	72.169	49.062	1	0.559128
	67.548	48.367	0.911833	0.545867
	62.825	49.39	0.82172	0.565386
	66.972	48.395	0.900843	0.546402
	67.023	48.955	0.901816	0.557086
	68.881	47.96	0.937266	0.538102
	63.65	47.729	0.837461	0.533695
	67.294	47.028	0.906987	0.52032
	63.989	45.379	0.843929	0.488858
	58.446	47.582	0.738171	0.53089
	64.22	44.672	0.848336	0.475368
	67.763	48.91	0.915935	0.556228
	62.26	43.616	0.81094	0.45522
	66.593	46.621	0.893612	0.512554
	62.91	47.87	0.823342	0.536385
	64.616	46.701	0.855892	0.514081
	63	44.017	0.825059	0.462871
	65.418	47.48	0.871194	0.528944
	67.898	44.859	0.918511	0.478936
	66.328	46.254	0.888556	0.505552
	65.243	46.655	0.867855	0.513203
	61.977	45.305	0.805541	0.487446
	60.333	43.644	0.774174	0.455754
	65.322	45.407	0.869362	0.489392
	62.384	45.542	0.813306	0.491967
	63.684	45.294	0.83811	0.487236
	63.045	46.797	0.825918	0.515912
	65.328	46.13	0.869476	0.503186
	64.927	46.757	0.861826	0.515149
	63.853	46.062	0.841334	0.501889
	64.678	45.825	0.857075	0.497367
	60.079	44.492	0.769328	0.471934
	61.599	44.412	0.798329	0.470408
	63.424	44.367	0.833149	0.469549
	63.74	44.616	0.839178	0.4743
	61.062	43.181	0.788083	0.446921
	61.904	46.395	0.804148	0.508242
	64.316	44.062	0.850168	0.46373
	59.712	45.802	0.762325	0.496928
	63.164	42.667	0.828188	0.437114
	60.91	41.09	0.785183	0.407025
	60.299	42.751	0.773525	0.438716
	60.017	41.571	0.768145	0.416202
	61.102	42.407	0.788846	0.432153
	62.226	43.079	0.810292	0.444974
	64.164	44.153	0.847268	0.465466
	61.35	41.729	0.793578	0.419217
	59.52	41.299	0.758662	0.411013
	58.667	43.446	0.742387	0.451977
	61.819	44.898	0.802526	0.47968
	60.904	44.209	0.785068	0.466534
	59.48	41.864	0.757899	0.421793
	67.384	44.814	0.908704	0.478078
	64.944	43.26	0.86215	0.448428
	65.023	43.401	0.863657	0.451118
	64.237	44.119	0.848661	0.464817
	61.927	44.469	0.804587	0.471495
	60.322	43.576	0.773964	0.454457
	63.831	43.254	0.840914	0.448313
	62.045	43.384	0.806838	0.450794
	61.638	41.797	0.799073	0.420514
	59.435	41.373	0.75704	0.412425
	60.96	42.062	0.786137	0.42557
	59.028	41.768	0.749275	0.419961
	58.288	42.226	0.735156	0.4287
	58.819	40.424	0.745287	0.394318
	60.441	43.452	0.776234	0.452091
	62.203	42.068	0.809853	0.425685
	60.96	42.695	0.786137	0.437648
	63.271	44.153	0.83023	0.465466
	59.237	43.729	0.753263	0.457376
	60.621	43.627	0.779669	0.45543
	60.452	44.921	0.776444	0.480119
	61.503	43.983	0.796497	0.462222
	60.107	44.972	0.769862	0.481092
	59.412	43.096	0.756602	0.445299
	64.949	43.475	0.862245	0.45253
	62.774	43.412	0.820747	0.451328
	58.017	43.531	0.729985	0.453598
	60.412	43.282	0.775681	0.448848
	62.35	43.723	0.812657	0.457262
	58.333	41.932	0.736015	0.42309
	61.441	40.791	0.795314	0.40132
	59.209	42.412	0.752728	0.432248
	60.181	41.915	0.771274	0.422766
	63.565	42.181	0.835839	0.427841
	61.384	43.379	0.794227	0.450698
	64.994	43.373	0.863104	0.450584
	61.379	44.09	0.794131	0.464264
	59.514	44.068	0.758548	0.463844
	64.04	42.028	0.844902	0.424922
	61.616	41.932	0.798653	0.42309
	62.079	43.825	0.807487	0.459208
	60.345	45.017	0.774403	0.481951
	62.277	42.718	0.811265	0.438087
	61.977	42.763	0.805541	0.438945
	58.972	42.48	0.748207	0.433546
	60.989	42.056	0.78669	0.425456
	60.746	40.638	0.782054	0.398401
	59.542	42.644	0.759082	0.436675
	59.153	41.74	0.75166	0.419427
	59.333	41.096	0.755094	0.40714
	63.525	45.175	0.835076	0.484965
	61.966	42.452	0.805331	0.433012
	63.791	40.78	0.840151	0.40111
	61.588	42.469	0.798119	0.433336
	60.91	42.96	0.785183	0.442704
	66.734	44.78	0.896302	0.477429
	61.266	45.52	0.791975	0.491548
	60.379	41.78	0.775052	0.42019
	66.333	43.508	0.888651	0.45316
	61.045	41.695	0.787759	0.418568
	61.215	42.412	0.791002	0.432248
	59.418	41.599	0.756716	0.416737
	59.034	41.435	0.749389	0.413608
	57.983	40.904	0.729337	0.403476
	61.085	39.78	0.788522	0.382031
	59.056	40.938	0.749809	0.404125
	56.797	41.424	0.706708	0.413398
	62.169	40.571	0.809204	0.397123
	61.203	42.006	0.790773	0.424502
	58.989	40.497	0.748531	0.395711
	57.588	39.944	0.7218	0.38516
	58.028	40.147	0.730195	0.389033
	62.887	38.915	0.822903	0.365527
	60.751	40.91	0.782149	0.403591
	63.209	41.593	0.829047	0.416622
	61.311	42.701	0.792834	0.437762
	60.881	41.22	0.784629	0.409505
	58.514	41.548	0.739468	0.415764
	61.644	42.876	0.799187	0.441101
	60.367	42.61	0.774823	0.436026
	59.514	42.136	0.758548	0.426982
	64.768	42.734	0.858792	0.438392
	58.638	41.554	0.741834	0.415878
	60.124	43.04	0.770186	0.44423
	61.073	44.582	0.788293	0.473651
	60.989	43.706	0.78669	0.456937
	62.864	42.87	0.822464	0.440987
	62.876	41.367	0.822693	0.41231
	60.887	41.316	0.784744	0.411337
	61.842	42.746	0.802965	0.438621
	59.61	39.87	0.760379	0.383748
	61.35	40.441	0.793578	0.394642
	56.96	40.768	0.709818	0.400881
	56.678	38.938	0.704438	0.365966
	56.068	38.266	0.692799	0.353144
	62.712	41.734	0.819564	0.419312
	60.774	41.051	0.782588	0.406281
	55.65	40.395	0.684824	0.393765
	60.576	41.458	0.77881	0.414046
	63.028	40.379	0.825593	0.39346
	58.085	41.718	0.731283	0.419007
	62.023	40.915	0.806418	0.403686
	57.949	43.367	0.728688	0.450469
	61.412	40.667	0.794761	0.398954
	61.497	40.927	0.796383	0.403915
	59.893	39.87	0.765779	0.383748
	58.486	41.91	0.738934	0.42267
	59.226	39.407	0.753053	0.374914
	57.469	38.136	0.71953	0.350664
	57.944	39.718	0.728593	0.380848
	53.102	38.169	0.636209	0.351294
	57.904	36.825	0.72783	0.325651
	56.672	37.316	0.704323	0.335019
	54.588	41.718	0.664562	0.419007
	64.537	40.254	0.854384	0.391075
	59.356	40.944	0.755533	0.404239
	60.153	39.96	0.77074	0.385465
	64.48	42.254	0.853297	0.429234
	60.062	41.938	0.769003	0.423205
	61.667	40.441	0.799626	0.394642
	63.299	43.904	0.830764	0.460715
	62.503	42.836	0.815577	0.440338
	63.39	41.424	0.8325	0.413398
	57.379	41.537	0.717813	0.415554
	57.475	42.305	0.719644	0.430207
	61.638	39.836	0.799073	0.383099
	59.576	39.633	0.759731	0.379226
	60.548	40.401	0.778276	0.393879
	56.028	41.192	0.692036	0.408971
	57.469	40.944	0.71953	0.404239
	60.153	40.944	0.77074	0.404239
	57.994	40.322	0.729547	0.392372
	57.186	39.169	0.71413	0.370373
	58.373	42.26	0.736778	0.429348
	58.723	40.661	0.743456	0.39884
	59.062	40.842	0.749924	0.402293
	57.124	40.672	0.712947	0.39905
	59.469	40.113	0.757689	0.388384
	58.096	38.367	0.731493	0.355071
	55.277	36.876	0.677707	0.326624
	60.006	38.333	0.767935	0.354423
	60.096	40.299	0.769652	0.391933
	57.78	39.266	0.725464	0.372224
	56.65	36.751	0.703904	0.324239
	58.582	38.684	0.740765	0.36112
	61.492	37.023	0.796287	0.329428
	57.056	38.243	0.71165	0.352705
	59.78	37.525	0.763623	0.339006
	61.158	40.763	0.789915	0.400786
	53.203	38.605	0.638136	0.359612
	61.028	39.068	0.787434	0.368446
	61.226	39.017	0.791212	0.367473
	58.463	40.689	0.738495	0.399374
	58.831	41.271	0.745516	0.410479
	59.802	40.39	0.764043	0.393669
	56.661	38.181	0.704114	0.351523
	61.655	42.763	0.799397	0.438945
	56.514	40.486	0.701309	0.395501
	56.712	40.277	0.705087	0.391513
	60.514	39.226	0.777627	0.371461
	58.446	36.576	0.738171	0.3209
	54.599	38.446	0.664771	0.356579
	55.107	38.605	0.674464	0.359612
	59.712	39.571	0.762325	0.378043
	60.147	38.412	0.770625	0.35593
	56.13	39.277	0.693982	0.372434
	54.339	38.983	0.659811	0.366824
	55.672	37.401	0.685244	0.33664
	58.746	39.605	0.743895	0.378692
	60.096	39.017	0.769652	0.367473
	58.531	38.876	0.739792	0.364783
	60.723	39.706	0.781615	0.380619
	58.362	40.328	0.736568	0.392486
	61.605	42.576	0.798443	0.435377
	60.164	41.972	0.770949	0.423853
	59.706	41.164	0.762211	0.408437
	58.412	40.13	0.737522	0.388709
	57.186	39.706	0.71413	0.380619
	61.254	41.559	0.791746	0.415973
	62.672	39.446	0.818801	0.375658
	60.599	37.938	0.779249	0.346886
	62.266	39.52	0.811055	0.37707
	59.864	37.345	0.765226	0.335572
	54.825	39.254	0.669083	0.371995
	58.39	41	0.737102	0.405308
	55.379	38.48	0.679654	0.357227
	56.441	35.887	0.699916	0.307754
	57.153	38.22	0.713501	0.352267
	58.401	40.203	0.737312	0.390102
	56.09	37.418	0.693219	0.336965
	61.288	37.734	0.792395	0.342994
	58.831	37.277	0.745516	0.334275
	61.972	40.249	0.805445	0.390979
	56.898	41.497	0.708635	0.414791
	59.469	39.412	0.757689	0.37501
	58.599	39.785	0.74109	0.382126
	61.096	38.729	0.788732	0.361978
	59.288	37.791	0.754236	0.344082
	57.904	38.356	0.72783	0.354861
	56.616	39.04	0.703255	0.367912
	59.085	39.768	0.750363	0.381802
	57.655	38.158	0.723079	0.351084
	53.638	36.096	0.646436	0.311742
	54.91	35.718	0.670705	0.304529
	56.226	35	0.695814	0.29083
	50.904	31.412	0.594272	0.222373
	47.955	32.887	0.538007	0.250515
	53.469	32.684	0.643211	0.246642
	54.588	35.627	0.664562	0.302793
	53.26	37.441	0.639224	0.337404
	55.672	38.006	0.685244	0.348184
	56.458	36.141	0.70024	0.3126
	58.401	39.045	0.737312	0.368007
	59.768	38.503	0.763394	0.357666
	57.463	38.938	0.719415	0.365966
	57.458	39.616	0.71932	0.378902
	60.407	38.825	0.775586	0.36381
	58.853	37.983	0.745936	0.347745
	58.079	38.915	0.731168	0.365527
	61.791	40.802	0.801992	0.40153
	59.006	40.768	0.748855	0.400881
	55.542	39.514	0.682763	0.376956
	59.497	39.062	0.758223	0.368332
	58.655	40.678	0.742158	0.399164
	59.266	39.141	0.753816	0.369839
	54.944	37.017	0.671354	0.329314
	56.407	37.282	0.699267	0.33437
	54.198	37.119	0.657121	0.33126
	56.011	36.853	0.691712	0.326185
	56.621	37.463	0.70335	0.337823
	54.463	34.096	0.662177	0.273582
	56.514	35.339	0.701309	0.297298
	57.757	37.458	0.725025	0.337728
	53.09	37.701	0.63598	0.342364
	56.006	36.469	0.691616	0.318858
	58.09	36.734	0.731378	0.323914
	52.802	36.395	0.630485	0.317446
	55.141	35.158	0.675113	0.293845
	55.74	37.153	0.686541	0.331909
	54.503	36.554	0.66294	0.32048
	54.006	33.96	0.653457	0.270988
	49.277	32.672	0.56323	0.246413
	55.141	35.723	0.675113	0.304625
	57.48	34.514	0.71974	0.281558
	50.452	35.48	0.585648	0.299989
	56.91	36.814	0.708864	0.325441
	55.706	36.175	0.685893	0.313249
	54.881	33.463	0.670152	0.261505
	51.316	36.045	0.602133	0.310769
	59.859	35.785	0.76513	0.305808
	52.893	33.808	0.632222	0.268087
	54.655	35.124	0.66584	0.293196
	50.655	32.915	0.589521	0.251049
	49.853	35.588	0.57422	0.302049
	50.463	35.119	0.585858	0.293101
	50.181	34.757	0.580478	0.286194
	49.441	32.825	0.566359	0.249332
	51.418	33.525	0.604079	0.262688
	47.972	31.791	0.538331	0.229604
	48.39	31.881	0.546306	0.231321
	51.774	32.576	0.610872	0.244581
	51.503	34.52	0.605701	0.281672
	54.249	36.017	0.658094	0.310234
	51.277	36.774	0.601389	0.324678
	50.446	34.599	0.585534	0.283179
	55.113	36.497	0.674578	0.319393
	52.864	37.113	0.631668	0.331146
	54.141	35.605	0.656033	0.302374
	55.412	36.373	0.680283	0.317027
	55.729	35.35	0.686331	0.297508
	54.198	33.271	0.657121	0.257842
	55.576	37.034	0.683412	0.329638
	54.051	34.367	0.654316	0.278753
	54.147	35.994	0.656147	0.309795
	54.158	34.04	0.656357	0.272514
	56.26	33.966	0.696463	0.271102
	49.373	34.842	0.565061	0.287816
	57.333	33.938	0.716935	0.270568
	54.028	36.345	0.653877	0.316492
	54.186	37.04	0.656892	0.329753
	49.418	35.186	0.56592	0.294379
	53.006	35.249	0.634378	0.295581
	55.373	34.893	0.679539	0.288789
	53.91	35.39	0.651626	0.298271
	56.616	36.39	0.703255	0.317351
	59.678	37.362	0.761677	0.335896
	57.48	36.04	0.71974	0.310673
	60.633	38.107	0.779898	0.350111
	60.723	39.655	0.781615	0.379646
	61.39	36.514	0.794341	0.319717
	59.78	37.04	0.763623	0.329753
	61	39.548	0.7869	0.377604
	59.949	38.949	0.766847	0.366176
	61.921	37.633	0.804472	0.341067
	57.164	39.667	0.713711	0.379875
	59.492	38.299	0.758128	0.353774
	62.153	38.847	0.808899	0.36423
	60.034	35.864	0.768469	0.307315
	57.819	37.294	0.726208	0.334599
	58.175	37.446	0.733	0.337499
	57.814	37.785	0.726112	0.343967
	56.797	37.158	0.706708	0.332004
	58.09	38.825	0.731378	0.36381
	59.305	38.395	0.75456	0.355606
	59.463	37.277	0.757575	0.334275
	58.757	40.441	0.744104	0.394642
	59.932	39.232	0.766523	0.371575
	62.994	40.367	0.824945	0.393231
	58.045	38.062	0.73052	0.349252
	54.712	40	0.666927	0.386228
	59.751	40.056	0.76307	0.387297
	61.288	38.655	0.792395	0.360566
	61.328	39.158	0.793158	0.370163
	60.475	38.977	0.776883	0.36671
	59.627	36.932	0.760704	0.327692
	62.186	40.627	0.809528	0.398191
	65.023	40.836	0.863657	0.402179
	60.983	38.633	0.786576	0.360147
	64.22	40.644	0.848336	0.398516
	61.136	40.729	0.789495	0.400137
	59.774	35.186	0.763508	0.294379
	56.441	38.797	0.699916	0.363276
	57.96	36.718	0.728898	0.323609
	56.169	35.706	0.694726	0.304301
	57.915	36.571	0.728039	0.320804
	55.435	33.384	0.680722	0.259998
	55.277	35.87	0.677707	0.30743
	57.226	36.119	0.714894	0.31218
	57.068	36.079	0.711879	0.311417
	59.729	37.209	0.76265	0.332977
	62.678	36.062	0.818916	0.311093
	59.65	37.045	0.761142	0.329848
	61.797	39.254	0.802106	0.371995
	59.463	38.977	0.757575	0.36671
	60.565	39.237	0.7786	0.371671
	60.932	38.006	0.785603	0.348184
	59.254	38.186	0.753587	0.351618
	60.689	41.175	0.780966	0.408647
	61.407	36.944	0.794665	0.327921
	62.266	41.209	0.811055	0.409296
	62.876	41.836	0.822693	0.421258
	64.271	40.525	0.849309	0.396245
	63.655	37.701	0.837556	0.342364
	62.898	36.542	0.823113	0.320251
	61.712	39.706	0.800485	0.380619
	61.554	40.124	0.79747	0.388594
	61.655	39.023	0.799397	0.367588
	63.39	38.023	0.8325	0.348508
	58.175	40.181	0.733	0.389682
	58.836	36.672	0.745612	0.322731
	57.644	40.356	0.722869	0.393021
	62.684	38.158	0.81903	0.351084
	59.627	37.746	0.760704	0.343223
	60.299	37.096	0.773525	0.330821
	61.39	36.266	0.794341	0.314985
	62.627	38.746	0.817942	0.362303
	60.39	38.26	0.775261	0.35303
	61.215	40.441	0.791002	0.394642
	63.395	40.746	0.832596	0.400462
	62.989	39.785	0.824849	0.382126
	64.655	40.141	0.856636	0.388919
	63.345	39.571	0.831642	0.378043
	64.791	38.695	0.859231	0.361329
	65.531	39.723	0.87335	0.380943
	66.209	39.757	0.886286	0.381592
	65.492	38.554	0.872606	0.358639
	60.836	41.661	0.783771	0.41792
	60.017	37.864	0.768145	0.345474
	61.723	38.672	0.800694	0.360891
	63.87	38.768	0.841658	0.362722
	62.429	38.667	0.814165	0.360795
	61.859	38.073	0.803289	0.349462
	64.847	38.774	0.860299	0.362837
	62.401	39.39	0.81363	0.37459
	63.994	39.186	0.844024	0.370698
	63.181	41.294	0.828513	0.410917
	63.734	40.576	0.839064	0.397218
	64.87	39.147	0.860738	0.369953
	61.836	40.04	0.80285	0.386992
	63.616	39.729	0.836812	0.381058
	66.52	39.492	0.892219	0.376536
	63.04	38.26	0.825822	0.35303
	64.186	39.469	0.847688	0.376097
	64.842	40.22	0.860204	0.390426
	62.203	38.362	0.809853	0.354976
	60.842	39.819	0.783885	0.382775
	64.831	39.746	0.859994	0.381382
	59.599	38.079	0.760169	0.349576
	65.367	40.791	0.870221	0.40132
	64.695	41.689	0.857399	0.418454
	61.52	40.644	0.796821	0.398516
	62.672	37.836	0.818801	0.34494
	62.667	39.571	0.818706	0.378043
	59.288	38.864	0.754236	0.364554
	61.328	40.045	0.793158	0.387087
	63.401	37.78	0.83271	0.343872
	60.169	36.356	0.771045	0.316702
	63.006	37.915	0.825174	0.346447
	60.91	37.22	0.785183	0.333187
	60.723	36.13	0.781615	0.31239
	59.763	36.266	0.763298	0.314985
	56.537	37.339	0.701748	0.335458
	58.096	36.763	0.731493	0.324468
	59.808	37.842	0.764157	0.345055
	57.61	38.056	0.72222	0.349138
	55.689	33.107	0.685568	0.254713
	60.599	38.045	0.779249	0.348928
	60.949	38.746	0.785927	0.362303
	63.096	36.452	0.826891	0.318534
	59.181	35.904	0.752194	0.308078
	57.927	36.859	0.728268	0.326299
	55	35.78	0.672422	0.305712
	55.689	33.972	0.685568	0.271217
	54.588	36.458	0.664562	0.318648
	53.718	34.842	0.647962	0.287816
	52.989	32.977	0.634053	0.252232
	55.147	33.61	0.675227	0.26431
	59.26	35.311	0.753701	0.296764
	58.853	35.831	0.745936	0.306685
	56.181	35.531	0.694955	0.300962
	60.989	35.068	0.78669	0.292128
	61.424	36.514	0.79499	0.319717
	60.006	37.678	0.767935	0.341926
	60.633	35.537	0.779898	0.301076
	57.492	35.051	0.719969	0.291803
	59.435	36.119	0.75704	0.31218
	58.424	36.062	0.737751	0.311093
	54.011	32.395	0.653553	0.241128
	55.706	35.096	0.685893	0.292662
	54.249	36.531	0.658094	0.320041
	53.825	34.107	0.650004	0.273792
	54.079	36.09	0.65485	0.311627
	56.288	34.537	0.696997	0.281996
	56.328	35.565	0.69776	0.30161
	56.023	35.209	0.691941	0.294818
	57.266	32.531	0.715657	0.243723
	50.972	33.718	0.59557	0.26637
	51.237	35.401	0.600626	0.298481
	51.893	33.542	0.613142	0.263012
	54.153	34.531	0.656262	0.281882
	59.91	35.593	0.766103	0.302145
	60.294	38.469	0.77343	0.357017
	61.791	38.006	0.801992	0.348184
	61.068	37.073	0.788197	0.330382
	56.068	38.384	0.692799	0.355396
	57.407	34.367	0.718347	0.278753
	60.079	36.463	0.769328	0.318744
	59.452	36.576	0.757365	0.3209
	58.497	33.825	0.739144	0.268412
	61.339	39.333	0.793368	0.373502
	56.379	34.751	0.698733	0.28608
	57.023	35.384	0.71102	0.298157
	63.124	35.452	0.827425	0.299454
	62.864	37.226	0.822464	0.333302
	61.079	36.243	0.788407	0.314546
	58.333	37.017	0.736015	0.329314
	59.475	35.401	0.757804	0.298481
	56.017	35.249	0.691826	0.295581
	58.073	35.356	0.731054	0.297623
	57.554	33.768	0.721152	0.267324
	53.571	33.446	0.645158	0.261181
	57.672	35.305	0.723403	0.29665
	52.949	32.927	0.63329	0.251278
	58.486	36.706	0.738934	0.32338
	59.621	35.661	0.760589	0.303442
	61.797	37.52	0.802106	0.338911
	59.367	34.48	0.755743	0.280909
	61.582	37.847	0.798004	0.34515
	60.859	35.576	0.78421	0.30182
	58.966	35.192	0.748092	0.294494
	59.689	35.853	0.761887	0.307105
	60.192	36.548	0.771484	0.320366
	59.034	36.04	0.749389	0.310673
	54.339	32.153	0.659811	0.236511
	57.096	34.904	0.712413	0.288999
	56.689	34.023	0.704648	0.27219
	58.158	33.113	0.732676	0.254827
	59.548	36.011	0.759196	0.31012
	57.763	36.26	0.725139	0.314871
	58.22	35.814	0.733859	0.306361
	56.299	34.113	0.697207	0.273907
	56.548	33.452	0.701958	0.261295
	58.475	33.475	0.738724	0.261734
	57.915	36.605	0.728039	0.321453
	56.452	34.633	0.700126	0.283828
	57.345	34.503	0.717164	0.281348
	57.452	35.605	0.719206	0.302374
	56.746	35.35	0.705735	0.297508
	58.605	34.559	0.741204	0.282416
	60.068	35.582	0.769118	0.301935
	58.237	37.04	0.734183	0.329753
	64.175	36.859	0.847478	0.326299
	61.339	36.062	0.793368	0.311093
	59.147	34.497	0.751545	0.281233
	59.723	34.96	0.762535	0.290067
	60.441	38.395	0.776234	0.355606
	64.571	38.571	0.855033	0.358964
	62.418	37.831	0.813955	0.344845
	59.384	36.006	0.756067	0.310024
	64.243	37.593	0.848775	0.340304
	63.605	35.599	0.836602	0.302259
	62.266	38.395	0.811055	0.355606
	60.542	36.085	0.778161	0.311532
	64.299	38.282	0.849844	0.35345
	62.492	36.22	0.815367	0.314107
	63.345	37.74	0.831642	0.343108
	65.701	35.475	0.876593	0.299893
	62.972	38.593	0.824525	0.359383
	61.203	39.616	0.790773	0.378902
	62.034	37.638	0.806628	0.341162
	67.537	38.384	0.911623	0.355396
	62.927	38.429	0.823666	0.356254
	69.452	37.859	0.948161	0.345379
	66.35	37.944	0.888976	0.347001
	65.48	37.04	0.872377	0.329753
	59.616	36.689	0.760494	0.323056
	67.034	38.825	0.902026	0.36381
	62.881	38.254	0.822789	0.352915
	69.808	38.531	0.954953	0.3582
	57.333	34.429	0.716935	0.279936
	66.243	38.87	0.886934	0.364668
	61.78	37.362	0.801782	0.335896
	67.768	37.712	0.916031	0.342574
	62	38.542	0.80598	0.35841
	61.271	35.932	0.792071	0.308613
	63.955	39.746	0.84328	0.381382
	67.311	37.938	0.907311	0.346886
	58.04	35.825	0.730424	0.306571
	60.706	35.554	0.781291	0.3014
	65.977	37.819	0.881859	0.344616
	62.158	36.565	0.808994	0.32069
	62.944	35.768	0.823991	0.305483
	65.525	35.994	0.873235	0.309795
	65.429	38.322	0.871403	0.354213
	63.169	38.91	0.828284	0.365432
	63.051	37.746	0.826032	0.343223
	61.164	36.395	0.790029	0.317446
	65.299	37.932	0.868923	0.346772
	66.446	37.548	0.890807	0.339445
	66.096	38.633	0.88413	0.360147
	64.525	37.565	0.854156	0.33977
	63.734	35.503	0.839064	0.300427
	67.192	37.175	0.905041	0.332328
	67.407	39.751	0.909143	0.381478
	66.678	37.621	0.895234	0.340838
	67.983	38.209	0.920133	0.352057
	64.864	38.74	0.860624	0.362188
	62.881	35.107	0.822789	0.292872
	63.232	37.944	0.829486	0.347001
	62.966	37.797	0.82441	0.344196
	63.853	38.39	0.841334	0.35551
	67.011	37.379	0.901587	0.336221
	65.203	38.181	0.867092	0.351523
	64.734	37.944	0.858143	0.347001
	64.791	36.39	0.859231	0.317351
	63.006	36.508	0.825174	0.319602
	59.627	34.373	0.760704	0.278867
	63.966	36.847	0.84349	0.32607
	63.91	37.768	0.842422	0.343643
	64.887	38.175	0.861062	0.351408
	65.842	36.39	0.879283	0.317351
	68.605	39.695	0.932	0.380409
	62.045	37.102	0.806838	0.330936
	61.655	36.825	0.799397	0.325651
	65.401	38.316	0.870869	0.354098
	67.927	38.023	0.919064	0.348508
	68.175	38.068	0.923796	0.349367
	63.853	36.186	0.841334	0.313459
	63.655	36.294	0.837556	0.315519
	64.028	36.186	0.844673	0.313459
	66.412	37.525	0.890159	0.339006
	62.503	37.994	0.815577	0.347955
	66.808	35.475	0.897714	0.299893
	69.633	37.04	0.951614	0.329753
	63.932	35.548	0.842841	0.301286
	62.107	37.785	0.808021	0.343967
	65.559	37.593	0.873884	0.340304
	63.531	36.215	0.83519	0.314012
	66.701	38.706	0.895673	0.361539
	66.667	35.701	0.895024	0.304205
	66.593	37.056	0.893612	0.330058
	62.983	37.48	0.824735	0.338148
	65.689	36.379	0.876364	0.317141
	67.045	37.977	0.902236	0.34763
	62.791	35.52	0.821072	0.300752
	62.282	35.791	0.81136	0.305922
	64.311	38.113	0.850073	0.350225
	64.876	34.949	0.860852	0.289857
	61.712	35.644	0.800485	0.303118
	64.232	36.503	0.848565	0.319507
	65.175	38.525	0.866557	0.358086
	68.215	37.424	0.924559	0.337079
	63.469	35.723	0.834007	0.304625
	68.164	36.831	0.923586	0.325765
	65.576	35.537	0.874208	0.301076
	64.435	38.429	0.852438	0.356254
	67.921	38.254	0.91895	0.352915
	61.87	34.802	0.803499	0.287053
	64.65	36.684	0.85654	0.32296
	65.525	38.367	0.873235	0.355071
	64.548	35.644	0.854594	0.303118
	63.932	36.424	0.842841	0.318
	63.842	34.175	0.841124	0.27509
	64.734	39.379	0.858143	0.37438
	64.537	39.181	0.854384	0.370602
	66.932	37.655	0.90008	0.341487
	64.458	36.87	0.852877	0.326509
	62.322	36.768	0.812123	0.324563
	65.062	37.435	0.864401	0.337289
	61.684	35.429	0.79995	0.299015
	63.734	38.294	0.839064	0.353679
	61.492	34.627	0.796287	0.283714
	62.91	38.096	0.823342	0.349901
	63.757	35.938	0.839502	0.308727
	66.751	38.237	0.896627	0.352591
	62.215	37.633	0.810082	0.341067
	63.994	36.006	0.844024	0.310024
	62.972	33.446	0.824525	0.261181
	60.215	33.927	0.771922	0.270358
	65.571	39	0.874113	0.367149
	67.458	37.237	0.910116	0.333511
	65.949	37.045	0.881325	0.329848
	63.107	36.864	0.827101	0.326395
	63.96	35.333	0.843376	0.297184
	62.689	35.345	0.819125	0.297413
	63.757	35.209	0.839502	0.294818
	63.938	36.514	0.842956	0.319717
	66.226	35.345	0.88661	0.297413
	62.718	34.531	0.819679	0.281882
	59.266	34.938	0.753816	0.289647
	61.503	33.944	0.796497	0.270682
	66.644	36.085	0.894585	0.311532
	65.695	37.215	0.876479	0.333092
	63.571	36.836	0.835954	0.32586
	66.186	37.842	0.885847	0.345055
	70.006	37.661	0.958731	0.341601
	63.559	37.395	0.835725	0.336526
	63.842	35.085	0.841124	0.292452
	61.819	36.684	0.802526	0.32296
	65.508	37.853	0.872911	0.345264
	66.056	37.638	0.883366	0.341162
	64.401	38.192	0.85179	0.351732
	61.825	35.859	0.802641	0.30722
	64.621	37.356	0.855987	0.335782
	62.023	37.345	0.806418	0.335572
	63.463	37.073	0.833893	0.330382
	66.463	36.655	0.891132	0.322407
	65.096	37.356	0.86505	0.335782
	64.04	37.621	0.844902	0.340838
	61.548	36.011	0.797356	0.31012
	64.085	39.373	0.845761	0.374265
	64.362	34.853	0.851046	0.288026
	65.497	35.859	0.872701	0.30722
	60.333	35.107	0.774174	0.292872
	65.774	37.91	0.877986	0.346352
	67.548	36.966	0.911833	0.328341
	62.463	37.412	0.814813	0.33685
	67.305	36.751	0.907197	0.324239
	63.847	37.192	0.84122	0.332653
	64.322	36.847	0.850282	0.32607
	66.186	36.644	0.885847	0.322197
	62.898	36.91	0.823113	0.327272
	68.328	37.113	0.926715	0.331146
	63.181	36.147	0.828513	0.312715
	64.887	37.322	0.861062	0.335133
	64.91	38.339	0.861501	0.354537
	61.073	36.678	0.788293	0.322846
	64.04	33.944	0.844902	0.270682
	63.616	36.395	0.836812	0.317446
	61.294	36.864	0.792509	0.326395
	63.542	36.729	0.8354	0.323819
	63.667	35.379	0.837785	0.298062
	63.87	38.977	0.841658	0.36671
	63.458	33.774	0.833798	0.267439
	66.045	37.554	0.883157	0.33956
	65.316	37.339	0.869248	0.335458
	64.864	37.277	0.860624	0.334275
	65.203	35.723	0.867092	0.304625
	63.271	32.972	0.83023	0.252137
	64.051	37.175	0.845112	0.332328
	66.802	36.537	0.8976	0.320156
	65.435	37.311	0.871518	0.334923
	68.124	33.621	0.922823	0.26452
	63.746	36.638	0.839293	0.322083
	60.576	34.559	0.77881	0.282416
	63.864	34.898	0.841544	0.288884
	65.328	35.808	0.869476	0.306247
	64.537	36.237	0.854384	0.314432
	60.638	32.537	0.779993	0.243837
	60.955	32.051	0.786041	0.234565
	61.525	34.452	0.796917	0.280375
	64.808	35.136	0.859555	0.293425
	65.011	36.633	0.863428	0.321987
	63.559	34.006	0.835725	0.271865
	64.87	34.644	0.860738	0.284038
	64.915	33.791	0.861597	0.267763
	67.621	37.548	0.913226	0.339445
	64.322	33.718	0.850282	0.26637
	65.689	35.78	0.876364	0.305712
	66.655	36.475	0.894795	0.318973
	63.661	37.576	0.837671	0.339979
	64.706	34.469	0.857609	0.280699
	60.989	32.847	0.78669	0.249752
	65.429	36.209	0.871403	0.313898
	64.514	34.853	0.853946	0.288026
	67.667	35.695	0.914104	0.304091
	66.932	35.706	0.90008	0.304301
	65.559	37.311	0.873884	0.334923
	67.463	38.429	0.910211	0.356254
	67.486	37.819	0.91065	0.344616
	63.621	35.367	0.836908	0.297833
	64.141	36.672	0.846829	0.322731
	62.655	36.243	0.818477	0.314546
	67.073	37.712	0.90277	0.342574
	64.616	34.554	0.855892	0.282321
	65.384	34.068	0.870545	0.273048
	63.52	35.412	0.834981	0.298691
	64.932	36.175	0.861921	0.313249
	59.056	32.983	0.749809	0.252347
	60.401	36.266	0.775471	0.314985
	62.599	35.548	0.817408	0.301286
	63.102	34.542	0.827005	0.282092
	64.537	35.017	0.854384	0.291155
	64.667	36.13	0.856865	0.31239
	64.203	33.616	0.848012	0.264424
	67.497	36.062	0.91086	0.311093
	62.915	37.379	0.823437	0.336221
	69.994	36.22	0.958502	0.314107
	66.243	35.486	0.886934	0.300103
	63.492	34.836	0.834446	0.287701
	66.22	37.169	0.886495	0.332214
	64.802	35.994	0.859441	0.309795
	65.102	33.582	0.865164	0.263775
	61.763	34.785	0.801458	0.286728
	62.904	36.243	0.823228	0.314546
	61.215	35.774	0.791002	0.305598
	66.164	35.667	0.885427	0.303556
	63.164	34.588	0.828188	0.28297
	65.006	35.333	0.863333	0.297184
	60.859	34.158	0.78421	0.274765
	61.271	33.847	0.792071	0.268832
	67.458	35.096	0.910116	0.292662
	66.294	38.068	0.887907	0.349367
	63.599	33.785	0.836488	0.267649
	62.684	35.04	0.81903	0.291594
	63.695	33.633	0.838319	0.264749
	69.407	35.876	0.947302	0.307544
	62.627	35.514	0.817942	0.300637
	64.107	36.689	0.84618	0.323056
	64.525	35.571	0.854156	0.301725
	61.96	35.554	0.805216	0.3014
	61.356	35.531	0.793692	0.300962
	63.864	33.746	0.841544	0.266905
	62.831	34.469	0.821835	0.280699
	66.904	36.701	0.899546	0.323285
	59.757	33.78	0.763184	0.267553
	63.661	36.554	0.837671	0.32048
	65.87	34.124	0.879818	0.274117
	63.599	33.356	0.836488	0.259463
	64.74	34.678	0.858258	0.284687
	62.452	35.966	0.814604	0.309261
	66.124	35.356	0.884664	0.297623
	62.808	33.35	0.821396	0.259349
	62.452	32.768	0.814604	0.248245
	60.102	32.898	0.769766	0.250725
	61.379	32.531	0.794131	0.243723
	63.384	34.695	0.832386	0.285011
	60.921	34.141	0.785393	0.274441
	62.887	32.588	0.822903	0.24481
	65.475	34.215	0.872281	0.275853
	63.966	33.582	0.84349	0.263775
	59.718	33.989	0.76244	0.271541
	62.023	33.689	0.806418	0.265817
	54.955	30.627	0.671564	0.207395
	64.785	35.017	0.859116	0.291155
	60.701	33.644	0.781195	0.264958
	61.763	33.983	0.801458	0.271426
	62.011	31.588	0.806189	0.225731
	62.616	33.435	0.817733	0.260971
	61.271	34.011	0.792071	0.271961
	59.266	33.345	0.753816	0.259254
	58.311	34.944	0.735595	0.289762
	63.102	32.418	0.827005	0.241567
	58.582	33.243	0.740765	0.257307
	63.525	33.102	0.835076	0.254617
	63.141	34.311	0.827749	0.277684
	63.35	33.034	0.831737	0.25332
	60.243	33.113	0.772457	0.254827
	63.723	34.452	0.838854	0.280375
	63.655	35.079	0.837556	0.292338
	63.119	36.09	0.82733	0.311627
	60.808	33.548	0.783237	0.263127
	64.48	33.836	0.853297	0.268622
	59.887	34.254	0.765664	0.276597
	64.198	34.158	0.847917	0.274765
	60.277	33.119	0.773105	0.254942
	57.616	32.26	0.722335	0.238552
	59.921	32.52	0.766313	0.243513
	66.068	33.78	0.883595	0.267553
	60.271	33.322	0.772991	0.258815
	65.944	33.175	0.881229	0.25601
	61.605	35.435	0.798443	0.29913
	63.644	33.333	0.837346	0.259025
	63.977	35.209	0.8437	0.294818
	60.537	31.96	0.778066	0.232828
	63.35	35.412	0.831737	0.298691
	61.554	34.198	0.79747	0.275529
	63.486	35.282	0.834332	0.296211
	61.401	34.746	0.794551	0.285984
	63.367	32.994	0.832061	0.252557
	60.91	32.791	0.785183	0.248684
	61.847	32.712	0.80306	0.247176
	62.78	34.723	0.820862	0.285545
	60.751	32.797	0.782149	0.248798
	64.39	33.87	0.85158	0.26927
	60.011	31.277	0.76803	0.219797
	63.192	33.808	0.828722	0.268087
	61.65	32.808	0.799302	0.249008
	62.175	32.994	0.809318	0.252557
	65.927	33.407	0.880905	0.260437
	59.61	31.949	0.760379	0.232618
	61.723	32.226	0.800694	0.237904
	59.469	33.379	0.757689	0.259902
	64.288	31.09	0.849634	0.216229
	60.904	32.944	0.785068	0.251603
	64.079	31.458	0.845646	0.22325
	62.192	34.277	0.809643	0.277036
	64.949	35.192	0.862245	0.294494
	65.13	33.367	0.865699	0.259673
	64.661	31.955	0.85675	0.232733
	63.164	33.045	0.828188	0.25353
	62.734	32	0.819984	0.233592
	63.746	31.876	0.839293	0.231226
	63.175	32.644	0.828398	0.245879
	59.949	34.723	0.766847	0.285545
	62.277	31.158	0.811265	0.217527
	67.621	34.412	0.913226	0.279612
	62.695	34.271	0.81924	0.276921
	61.492	31.175	0.796287	0.217851
	60.503	33.87	0.777417	0.26927
	62.475	31	0.815042	0.214512
	64.017	32.35	0.844463	0.240269
	64.684	34.525	0.857189	0.281768
	62.299	32.006	0.811684	0.233706
	56.028	30.729	0.692036	0.209341
	62.842	34.249	0.822045	0.276502
	63.96	33.136	0.843376	0.255266
	62.243	34.955	0.810616	0.289972
	67.74	34.085	0.915496	0.273373
	59.237	33.407	0.753263	0.260437
	56.367	31.819	0.698504	0.230138
	63.571	36.068	0.835954	0.311207
	61.938	32.254	0.804797	0.238438
	58.339	33.525	0.736129	0.262688
	64.881	34.113	0.860948	0.273907
	61.977	33.955	0.805541	0.270892
	62.876	34.356	0.822693	0.278543
	62.463	33.379	0.814813	0.259902
	64.78	34.136	0.859021	0.274346
	64.068	34.537	0.845436	0.281996
	60.469	32.932	0.776769	0.251374
	62.904	30.814	0.823228	0.210963
	64.384	34.045	0.851465	0.272609
	59.469	31.802	0.757689	0.229814
	63.814	32.079	0.84059	0.235099
	61.045	33.96	0.787759	0.270988
	60.768	31.977	0.782473	0.233153
	63.514	31.718	0.834866	0.228211
	65.52	32.571	0.87314	0.244486
	63.508	32.667	0.834752	0.246318
	66.802	33.814	0.8976	0.268202
	60.774	32.311	0.782588	0.239525
	64.508	34.87	0.853831	0.28835
	64.565	34.593	0.854919	0.283065
	63.062	32.469	0.826242	0.24254
	61.288	32.972	0.792395	0.252137
	65.977	33.181	0.881859	0.256125
	63.113	34.531	0.827215	0.281882
	65.305	33.356	0.869038	0.259463
	61.554	33.006	0.79747	0.252786
	61.655	31.282	0.799397	0.219892
	64.751	32.452	0.858468	0.242216
	60.921	34.921	0.785393	0.289323
	61.859	32.61	0.803289	0.24523
	65.192	34.412	0.866882	0.279612
	60.881	30.836	0.784629	0.211383
	65.525	33.757	0.873235	0.267114
	61.881	32.068	0.803709	0.234889
	64.977	31.424	0.86278	0.222602
	59.638	33.661	0.760914	0.265283
	61.028	34.147	0.787434	0.274555
	60.226	33.26	0.772132	0.257632
	61.938	32.085	0.804797	0.235213
	63.531	31.26	0.83519	0.219473
	62.373	29.52	0.813096	0.186274
	63.158	34.35	0.828074	0.278429
	60.616	33.09	0.779573	0.254388
	63.819	30.977	0.840685	0.214073
	64.096	34.22	0.84597	0.275948
	63.554	29.446	0.835629	0.184862
	61.068	32.113	0.788197	0.235748
	62.107	30.153	0.808021	0.198352
	63.13	33.226	0.827539	0.256983
	60	30.441	0.76782	0.203846
	62.938	31.13	0.823876	0.216992
	64.525	30.418	0.854156	0.203408
	58.085	30.011	0.731283	0.195642
	61.508	30.356	0.796592	0.202225
	63.96	30.881	0.843376	0.212241
	59.836	29.514	0.764691	0.18616
	63.186	33.124	0.828608	0.255037
	61.22	32.254	0.791097	0.238438
	57.904	31.153	0.72783	0.217431
	63.299	31.944	0.830764	0.232523
	65.079	31.299	0.864726	0.220217
	63.701	29.48	0.838434	0.185511
	60	31.486	0.76782	0.223785
	59.836	31.791	0.764691	0.229604
	59.791	29.667	0.763833	0.189079
	61.215	30.853	0.791002	0.211707
	61.475	30.175	0.795963	0.198771
	59.452	30.565	0.757365	0.206212
	61.864	29.921	0.803385	0.193925
	63.542	30.299	0.8354	0.201137
	62.989	31.181	0.824849	0.217965
	60.006	31.667	0.767935	0.227238
	61.339	32.034	0.793368	0.23424
	59.972	29.96	0.767286	0.194669
	61.994	31.237	0.805865	0.219034
	60.977	31.209	0.786461	0.2185
	61.322	30.322	0.793044	0.201576
	60.412	31.418	0.775681	0.222487
	58.277	31.062	0.734946	0.215695
	60.333	31.345	0.774174	0.221094
	57.859	28.876	0.726971	0.173987
	58.91	30.164	0.747024	0.198561
	63.136	28.085	0.827654	0.158895
	58.667	28.774	0.742387	0.172041
	58.311	28.734	0.735595	0.171278
	61.356	26.949	0.793692	0.13722
	58.277	28.164	0.734946	0.160402
	59.734	30.537	0.762745	0.205678
	58.825	28.35	0.745402	0.163951
	62.299	30.023	0.811684	0.195871
	63.09	30.153	0.826776	0.198352
	56.582	30.531	0.702606	0.205564
	61.254	31.017	0.791746	0.214836
	57.226	30.763	0.714894	0.20999
	60.339	31.729	0.774288	0.228421
	62.977	30.13	0.82462	0.197913
	63.475	29.989	0.834122	0.195222
	63.034	31.593	0.825708	0.225826
	59.508	31.446	0.758433	0.223021
	60.09	30.469	0.769538	0.204381
	61.124	31.441	0.789266	0.222926
	63.141	30.379	0.827749	0.202664
	60.537	29.181	0.778066	0.179806
	63.175	31.164	0.828398	0.217641
	61.045	29.91	0.787759	0.193715
	63.627	30.237	0.837022	0.199954
	58.723	30.627	0.743456	0.207395
	59.407	29.158	0.756506	0.179367
	61.514	31.571	0.796707	0.225406
	60.842	30.718	0.783885	0.209131
	61.689	30.056	0.800046	0.196501
	60.412	28.655	0.775681	0.16977
	60.983	28.689	0.786576	0.170419
	58.661	30.853	0.742273	0.211707
	57.751	29.22	0.72491	0.18055
	60.339	28.475	0.774288	0.166336
	59.254	31.333	0.753587	0.220865
	57.689	28.141	0.723727	0.159963
	56.802	30.09	0.706804	0.19715
	62.78	30.04	0.820862	0.196196
	58.74	30.588	0.74378	0.206651
	59.288	31.593	0.754236	0.225826
	57.678	28.808	0.723518	0.172689
	58.684	29.266	0.742712	0.181428
	58.305	28.192	0.73548	0.160936
	57.401	29.22	0.718232	0.18055
	57.695	29.006	0.723842	0.176467
	57.588	28.379	0.7218	0.164504
	61.74	29.209	0.801019	0.18034
	57.571	28.746	0.721476	0.171507
	55.559	27.554	0.683088	0.148764
	59.13	28.435	0.751221	0.165573
	54.768	28.893	0.667996	0.174311
	55.362	27.751	0.679329	0.152522
	56.429	29.599	0.699687	0.187781
	57.695	27.559	0.723842	0.148859
	56.616	27.915	0.703255	0.155651
	56.514	28.322	0.701309	0.163417
	58.294	27.932	0.735271	0.155976
	58.011	26.638	0.729871	0.131287
	60.508	30.723	0.777513	0.209227
	58.847	30.056	0.745822	0.196501
	55.78	28.367	0.687304	0.164275
	56.847	27.362	0.707662	0.1451
	58.921	28.944	0.747233	0.175284
	60.475	30.322	0.776883	0.201576
	58.74	29.537	0.74378	0.186598
	59.599	30.339	0.760169	0.2019
	59.797	29.819	0.763947	0.191979
	60.898	29.452	0.784954	0.184977
	55.723	27.407	0.686217	0.145959
	58.328	28.226	0.735919	0.161585
	56.701	28.576	0.704877	0.168263
	59.966	28.814	0.767172	0.172804
	61.22	29.847	0.791097	0.192513
	59.718	29.395	0.76244	0.183889
	60.701	29.322	0.781195	0.182496
	61.028	29.797	0.787434	0.191559
	61.186	28.949	0.790449	0.17538
	60.621	28.39	0.779669	0.164714
	56.96	30.215	0.709818	0.199534
	60.073	30.548	0.769213	0.205888
	58.689	28.452	0.742807	0.165897
	59.458	28.893	0.757479	0.174311
	59.395	29.503	0.756277	0.18595
	56.102	27.774	0.693448	0.152961
	59.65	28.537	0.761142	0.167519
	59.927	28.61	0.766428	0.168912
	59.311	28.853	0.754675	0.173548
	55.514	30.322	0.682229	0.201576
	58.887	30.136	0.746585	0.198027
	58.627	29.605	0.741624	0.187896
	58.181	28.316	0.733115	0.163302
	66.124	30.774	0.884664	0.2102
	59.203	29.429	0.752614	0.184538
	57.186	28.853	0.71413	0.173548
	60.825	30.277	0.783561	0.200717
	59.503	30.384	0.758338	0.202759
	62.554	30.678	0.81655	0.208368
	58.497	28.39	0.739144	0.164714
	60.542	29.186	0.778161	0.179902
	63.768	28.695	0.839712	0.170533
	60.113	31.266	0.769976	0.219587
	58.04	29.441	0.730424	0.184767
	63.904	31.311	0.842307	0.220446
	58.446	28.989	0.738171	0.176143
	61.282	30.305	0.79228	0.201252
	56.96	30.412	0.709818	0.203293
	61.26	31.249	0.791861	0.219263
	56.859	30.644	0.707891	0.20772
	57.559	30.644	0.721247	0.20772
	61.322	30.282	0.793044	0.200813
	57.124	28.311	0.712947	0.163207
	66.237	28.198	0.88682	0.161051
	62.678	30.774	0.818916	0.2102
	63.446	31.379	0.833569	0.221743
	64.734	31.062	0.858143	0.215695
	60.52	31.774	0.777742	0.22928
	63.141	29.497	0.827749	0.185835
	65.153	32.644	0.866138	0.245879
	62.254	31.492	0.810826	0.223899
	66.627	32.113	0.894261	0.235748
	65.045	29.757	0.864077	0.190796
	65.401	31.893	0.870869	0.23155
	67.198	32.571	0.905155	0.244486
	61.701	30.831	0.800275	0.211287
	62.435	32.559	0.814279	0.244257
	65.661	33.288	0.87583	0.258166
	66.124	31.751	0.884664	0.228841
	61.441	29.26	0.795314	0.181313
	62.983	29.689	0.824735	0.189499
	61.085	32.136	0.788522	0.236186
	59.61	29.379	0.760379	0.183584
	63.537	29.729	0.835305	0.190262
	62.847	30.073	0.82214	0.196825
	65.215	29.633	0.86732	0.18843
	66.22	31.395	0.886495	0.222048
	60.672	30.119	0.780642	0.197703
	61.751	30.305	0.801229	0.201252
	63.299	33.226	0.830764	0.256983
	63.729	31.644	0.838968	0.226799
	60.508	29.746	0.777513	0.190586
	61	31.034	0.7869	0.215161
	67.695	30.429	0.914638	0.203617
	63.621	30.48	0.836908	0.204591
	65.486	32.734	0.872491	0.247596
	67.232	30.684	0.905804	0.208483
	65.921	30.853	0.880791	0.211707
	63.881	30.345	0.841868	0.202015
	60.186	28.966	0.771369	0.175704
	65.243	32.243	0.867855	0.238228
	63.237	31.299	0.829581	0.220217
	65.458	32.582	0.871957	0.244696
	63.65	30.695	0.837461	0.208693
	63.734	30.74	0.839064	0.209551
	64.48	31.333	0.853297	0.220865
	66.616	32.593	0.894051	0.244906
	67.153	31.972	0.904297	0.233057
	62.644	30.463	0.818267	0.204266
	68.503	31.876	0.930054	0.231226
	66.458	29.475	0.891036	0.185416
	63.774	30.141	0.839827	0.198123
	65.141	32.508	0.865909	0.243284
	65.085	30.746	0.86484	0.209666
	67.203	31.446	0.905251	0.223021
	62.825	33.723	0.82172	0.266466
	66.203	32.859	0.886171	0.249981
	67.921	32.768	0.91895	0.248245
	67.051	33.158	0.902351	0.255686
	65.277	32.74	0.868503	0.24771
	70.644	31.983	0.970904	0.233267
	63.633	30.503	0.837137	0.205029
	62.542	31.61	0.816321	0.22615
	65.277	30.96	0.868503	0.213749
	64.514	32.927	0.853946	0.251278
	61.492	30.983	0.796287	0.214188
	63.667	31.616	0.837785	0.226265
	62.74	29.898	0.820098	0.193486
	63.915	32.446	0.842517	0.242101
	64.712	30.91	0.857723	0.212795
	68.288	32.141	0.925952	0.236282
	65.814	29.429	0.878749	0.184538
	61.192	30.508	0.790563	0.205125
	62.175	29.424	0.809318	0.184442
	65.605	30.412	0.874762	0.203293
	64.814	32.153	0.85967	0.236511
	66.215	31.153	0.8864	0.217431
	60.927	27.927	0.785507	0.15588
	68.175	33.508	0.923796	0.262364
	61.904	30.22	0.804148	0.19963
	64.034	29.831	0.844787	0.192208
	69.621	31.921	0.951385	0.232084
	63.113	30.282	0.827215	0.200813
	62.915	31.034	0.823437	0.215161
	63.192	29.853	0.828722	0.192628
	64.045	29.853	0.844997	0.192628
	66.26	31.537	0.887259	0.224758
	63.401	30.39	0.83271	0.202873
	61.96	31.429	0.805216	0.222697
	65.847	32.006	0.879379	0.233706
	68.232	31.362	0.924884	0.221419
	60.915	30.209	0.785278	0.19942
	64.362	31.559	0.851046	0.225177
	64.096	30.802	0.84597	0.210734
	63.638	31.508	0.837232	0.224204
	67.768	30.802	0.916031	0.210734
	66.78	31.542	0.89718	0.224853
	57.045	30.915	0.71144	0.21289
	66.102	31.299	0.884244	0.220217
	64.04	29.249	0.844902	0.181104
	63.345	31.22	0.831642	0.218709
	64.802	32.667	0.859441	0.246318
	62.644	29.672	0.818267	0.189174
	61.661	29.096	0.799512	0.178184
	65.458	31.616	0.871957	0.226265
	64.701	29.345	0.857514	0.182935
	64.802	31.124	0.859441	0.216878
	66.316	31.412	0.888327	0.222373
	63.944	29.593	0.84307	0.187667
	59.621	27.734	0.760589	0.152198
	61.011	32.192	0.78711	0.237255
	65.113	29.605	0.865374	0.187896
	61.175	30.13	0.790239	0.197913
	62.751	32.102	0.820308	0.235538
	61.559	29.068	0.797565	0.17765
	64.113	29.497	0.846295	0.185835
	64.746	31.689	0.858372	0.227658
	61.966	30.808	0.805331	0.210849
	59.757	29.452	0.763184	0.184977
	61.011	30	0.78711	0.195432
	63.751	28.435	0.839388	0.165573
	63.429	29.282	0.833244	0.181733
	65.339	29.751	0.869686	0.190682
	64.819	30.452	0.859765	0.204056
	63.147	29.661	0.827864	0.188964
	64.661	30.362	0.85675	0.202339
	65.525	30.65	0.873235	0.207834
	64.429	30.672	0.852324	0.208254
	63.48	31.559	0.834217	0.225177
	63.819	30.729	0.840685	0.209341
	65.825	31.192	0.878959	0.218175
	64.678	32.051	0.857075	0.234565
	65.633	32.96	0.875296	0.251908
	66.141	30.667	0.884988	0.208158
	65.124	30.672	0.865584	0.208254
	64.39	31.565	0.85158	0.225292
	65.328	31.13	0.869476	0.216992
	62	29.345	0.80598	0.182935
	66.362	31.073	0.889205	0.215905
	68.684	29.983	0.933508	0.195108
	64	30.87	0.844139	0.212032
	64.418	30.983	0.852114	0.214188
	65.864	32.554	0.879703	0.244162
	63.006	30.774	0.825174	0.2102
	64.305	28.876	0.849958	0.173987
	64.26	30.814	0.849099	0.210963
	61.492	28.395	0.796287	0.16481
	67.045	31.362	0.902236	0.221419
	61.672	31.701	0.799721	0.227887
	62.74	29.746	0.820098	0.190586
	64.576	31.232	0.855129	0.218938
	62.186	31.147	0.809528	0.217317
	64.39	31.051	0.85158	0.215485
	65.198	32.13	0.866996	0.236072
	67.508	31.401	0.91107	0.222163
	63.475	31.124	0.834122	0.216878
	62.006	27.706	0.806094	0.151664
	63.215	29.61	0.829161	0.187991
	64.266	30.096	0.849214	0.197264
	60.831	29.661	0.783675	0.188964
	67.876	29.429	0.918091	0.184538
	64.367	30.469	0.851141	0.204381
	62.226	30.124	0.810292	0.197798
	64.435	29.661	0.852438	0.188964
	64.542	30.655	0.85448	0.207929
	63.836	29.13	0.84101	0.178833
	64.797	29.757	0.859345	0.190796
	59.797	28.588	0.763947	0.168492
	62.876	29.119	0.822693	0.178623
	65.22	29.605	0.867416	0.187896
	63.599	30.169	0.836488	0.198657
	63.785	29.531	0.840037	0.186484
	62.328	29.763	0.812238	0.19091
	61.667	29.994	0.799626	0.195318
	61.294	27.915	0.792509	0.155651
	62.927	29.977	0.823666	0.194994
	61.48	29.209	0.796058	0.18034
	63.446	28.966	0.833569	0.175704
	66.582	29.898	0.893402	0.193486
	66.13	28.237	0.884778	0.161795
	66.627	31.599	0.894261	0.225941
	61.672	28.994	0.799721	0.176238
	64.718	28.831	0.857838	0.173128
	59.333	28.463	0.755094	0.166107
	63.712	29.548	0.838644	0.186808
	63.853	29.605	0.841334	0.187896
	67.723	30.362	0.915172	0.202339
	64.056	30.96	0.845207	0.213749
	65.345	30.22	0.869801	0.19963
	66.062	30.35	0.883481	0.20211
	64.599	29.266	0.855567	0.181428
	61.74	28.316	0.801019	0.163302
	66.672	29.621	0.895119	0.188201
	66.203	29.684	0.886171	0.189403
	61.169	28.073	0.790124	0.158666
	64.401	30.232	0.85179	0.199859
	67.203	30.068	0.905251	0.19673
	64.164	30.226	0.847268	0.199744
	64.627	28.486	0.856102	0.166546
	61.531	28.588	0.797031	0.168492
	65.153	30.689	0.866138	0.208578
	65.452	30.045	0.871842	0.196291
	67.209	32.424	0.905365	0.241681
	62.412	30.04	0.81384	0.196196
	67.627	28.435	0.91334	0.165573
	63.333	29.271	0.831413	0.181523
	62.605	29.944	0.817523	0.194364
	60	28.322	0.76782	0.163417
	61.367	29.147	0.793902	0.179157
	55.96	29	0.690739	0.176353
	56.932	28.52	0.709284	0.167195
	61.362	30.203	0.793807	0.199306
	58.932	27.508	0.747443	0.147886
	66.13	30.785	0.884778	0.21041
	61.65	30.232	0.799302	0.199859
	66.881	31.746	0.899107	0.228745
	64	30.367	0.844139	0.202435
	63.045	29.576	0.825918	0.187343
	58.124	29.458	0.732027	0.185091
	59.469	28.588	0.757689	0.168492
	59.689	27.249	0.761887	0.142944
	59.147	27.684	0.751545	0.151244
	62.192	29.333	0.809643	0.182706
	62.938	27.814	0.823876	0.153724
	63.09	28.836	0.826776	0.173224
	68.249	28.215	0.925208	0.161375
	64.559	29.175	0.854804	0.179692
	63.695	28.729	0.838319	0.171182
	62.825	27.842	0.82172	0.154259
	62.441	28.181	0.814394	0.160727
	61.305	29.746	0.792719	0.190586
	62.294	28.119	0.811589	0.159544
	63.458	30.04	0.833798	0.196196
	59.424	28.316	0.75683	0.163302
	63.164	27.503	0.828188	0.147791
	68.107	29.311	0.922499	0.182286
	62.356	28.294	0.812772	0.162883
	59.825	27.972	0.764481	0.156739
	60.593	29.232	0.779135	0.180779
	63.045	29.045	0.825918	0.177211
	59.616	27.203	0.760494	0.142067
	56.299	28.107	0.697207	0.159315
	63.531	28.706	0.83519	0.170743
	60.797	30.322	0.783027	0.201576
	62.548	29.045	0.816435	0.177211
	62.463	28.814	0.814813	0.172804
	60.209	29.181	0.771808	0.179806
	60.311	29.096	0.773754	0.178184
	59.102	27.446	0.750687	0.146703
	60.701	28.672	0.781195	0.170095
	60.141	28.847	0.770511	0.173434
	61.175	28.723	0.790239	0.171068
	61.136	29.209	0.789495	0.18034
	59.401	26.062	0.756392	0.120297
	60.362	27.571	0.774727	0.149088
	59.576	28.237	0.759731	0.161795
	64.401	29.328	0.85179	0.182611
	61.04	26.452	0.787663	0.127738
	63.661	28.864	0.837671	0.173758
	60.853	28.836	0.784095	0.173224
	62.706	27.554	0.81945	0.148764
	59.158	27.22	0.751755	0.142391
	62.367	29.034	0.812982	0.177001
	61.757	29.153	0.801343	0.179272
	63.367	29.136	0.832061	0.178948
	63.831	30.74	0.840914	0.209551
	59.559	27.881	0.759406	0.155003
	58.299	27.797	0.735366	0.1534
	57.079	27.463	0.712089	0.147027
	63.994	27.723	0.844024	0.151988
	60.718	29.26	0.781519	0.181313
	66.254	28.638	0.887144	0.169446
	63.463	29.249	0.833893	0.181104
	64.695	28.395	0.857399	0.16481
	62.401	28.463	0.81363	0.166107
	61.938	29	0.804797	0.176353
	60.531	28.955	0.777952	0.175494
	62.729	27.915	0.819889	0.155651
	61.582	28.814	0.798004	0.172804
	60.136	27.61	0.770415	0.149832
	58.503	27.158	0.739258	0.141208
	60.249	28.768	0.772571	0.171926
	58.61	27.751	0.7413	0.152522
	61.723	27.514	0.800694	0.148
	62.056	29.198	0.807048	0.180131
	57.701	30.023	0.723956	0.195871
	58.537	28.034	0.739907	0.157922
	63.39	28.339	0.8325	0.163741
	59.288	27.887	0.754236	0.155117
	62.006	27.621	0.806094	0.150042
	59.141	26.921	0.751431	0.136686
	59.017	29.333	0.749065	0.182706
	61.65	27.525	0.799302	0.14821
[truncated: 298 more rows]

## Sheet: Figure 5F
				Ratio
				1.11397
				1.15174
				1.1329
				1.14594
				1.12861
				1.16022
				1.09537
				1.07502
				1.18609
				1.16623
				1.18432
				1.18186
				1.18799
				1.188
				1.15643
				1.13892
				1.15316
				1.09648
				1.20418
				1.16418
				1.1872
				1.18314
				1.1746
				1.13645
				1.15129
				1.14765
				1.1499
				1.14984
				1.10065
				1.20472
				1.24792
				1.07732
				1.19257
				1.26685
				1.09982
				1.14497
				1.1371
				1.12814
				1.09516
				1.17602
				1.13872
				1.12622
				1.15222
				1.11159
				1.08687
				1.26114
				1.18383
				1.23555
				1.11257
				1.12639
				1.09359
				1.1538
				1.125
				1.09526
				1.12031
				1.17775
				1.10819
				1.13767
				1.19533
				1.16989
				1.18018
				1.16997
				1.1349
				1.18916
				1.24369
				1.20565
				1.19112
				1.13722
				1.15065
				1.1195
				1.16863
				1.20054
				1.13089
				1.1966
				1.16702
				1.1838
				1.13165
				1.22002
				1.16091
				1.19933
				1.18238
				1.07685
				1.14065
				1.12061
				1.10989
				1.12512
				1.01707
				1.10366
				1.09176
				1.15682
				1.11817
				1.1797
				1.1428
				1.12914
				1.15452
				1.09974
				1.08249
				1.15949
				1.15306
				1.16266
				1.09235
				1.11498
				1.17237
				1.1805
				1.23401
				1.22862
				1.14779
				1.15356
				1.16465
				1.21278
				1.19428
				1.18438
				1.13454
				1.12545
				1.1503
				1.15809
				1.16444
				1.09216
				1.25359
				1.14281
				1.14226
				1.23289
				1.15686
				1.09773
				1.00661
				1.1742
				1.14257
				1.04904
				1.14602
				1.24792
				1.20024
				1.1944
				1.1671
				1.14968
				1.16046
				1.21954
				1.15184
				1.12178
				1.1711
				1.17851
				1.1977
				1.21068
				1.18027
				1.20338
				1.20406
				1.08885
				1.15226
				1.18443
				1.125
				1.17533
				1.17647
				1.18134
				1.18139
				1.18251
				1.17191
				1.21632
				1.14025
				1.22302
				1.14781
				1.18104
				1.20165
				1.09562
				1.1259
				1.2551
				1.2286
				1.1575
				1.2229
				1.08759
				1.24694
				1.21073
				1.16786
				1.16193
				1.11569
				1.15123
				1.15848
				1.12475
				1.10496
				1.15863
				1.07141
				1.1852
				1.11177
				1.14482
				1.15165
				1.14404
				1.14303
				1.14948
				1.22781
				1.13212
				1.2179
				1.10253
				1.15105
				1.21802
				1.19781
				1.24205
				1.1252
				1.25561
				1.17348
				1.19063
				1.24278
				1.23362
				1.23278
				1.16847
				1.13329
				1.12501
				1.14613
				1.25929
				1.15203
				1.25785
				1.11853
				1.18105
				1.25881
				1.17073
				1.17705
				1.29094
				1.23498
				1.17519
				1.10645
				1.20515
				1.21259
				1.25395
				1.11654
				1.17695
				1.16136
				1.14537
				1.18445
				1.21788
				1.17124
				1.20563
				1.17513
				1.21053
				1.13201
				1.21416
				1.2098
				1.19643
				1.22299
				1.27141
				1.13694
				1.1908
				1.21142
				1.17352
				1.2508
				1.28361
				1.15918
				1.19395
				1.22679
				1.17555
				1.20987
				1.23278
				1.19507
				1.26255
				1.21658
				1.27599
				1.25157
				1.22179
				1.14603
				1.23496
				1.22437
				1.2679
				1.18268
				1.27995
				1.19399
				1.23794
				1.26467
				1.28712
				1.33192
				1.22801
				1.23087
				1.18944
				1.29111
				1.16766
				1.20431
				1.22056
				1.2769
				1.2183
				1.28516
				1.17708
				1.11513
				1.21745
				1.14512
				1.19416
				1.27477
				1.26284
				1.30061
				1.1405
				1.19141
				1.2192
				1.22812
				1.27561
				1.20985
				1.21437
				1.1906
				1.27809
				1.27474
				1.14752
				1.33817
				1.173
				1.20686
				1.22431
				1.2736
				1.18874
				1.21809
				1.23226
				1.28965
				1.15609
				1.2774
				1.31621
				1.2433
				1.20581
				1.24243
				1.22653
				1.21913
				1.30337
				1.34729
				1.28178
				1.28034
				1.35301
				1.30049
				1.33427
				1.20716
				1.27833
				1.3208
				1.16842
				1.27935
				1.25715
				1.33469
				1.23992
				1.30467
				1.32635
				1.32518
				1.31556
				1.2945
				1.25141
				1.30835
				1.33318
				1.30039
				1.29077
				1.31218
				1.33552
				1.31279
				1.31434
				1.35425
				1.30923
				1.23409
				1.35057
				1.30947
				1.29169
				1.27004
				1.24353
				1.18432
				1.25454
				1.28992
				1.3221
				1.41079
				1.29468
				1.22181
				1.26265
				1.29186
				1.33053
				1.34587
				1.26792
				1.265
				1.21747
				1.29608
				1.28918
				1.23001
				1.32747
				1.32816
				1.23996
				1.3925
				1.32891
				1.38489
				1.25229
				1.40423
				1.26955
				1.24101
				1.27378
				1.41185
				1.38063
				1.30689
				1.25579
				1.21804
				1.404
				1.37452
				1.33411
				1.36151
				1.30807
				1.24091
				1.36273
				1.35605
				1.3098
				1.3127
				1.33627
				1.22176
				1.28965
				1.26222
				1.35054
				1.38159
				1.25691
				1.33862
				1.27946
				1.34311
				1.27672
				1.30051
				1.36214
				1.30724
				1.28455
				1.25952
				1.3797
				1.31414
				1.35593
				1.35761
				1.2947
				1.27985
				1.2304
				1.2686
				1.32424
				1.37991
				1.31815
				1.44648
				1.29469
				1.31653
				1.3805
				1.40855
				1.26433
				1.33733
				1.34529
				1.45397
				1.28645
				1.32017
				1.34127
				1.31131
				1.2723
				1.3279
				1.27446
				1.23032
				1.31276
				1.40895
				1.39384
				1.32072
				1.29261
				1.33766
				1.43009
				1.32023
				1.31496
				1.39988
				1.31165
				1.27349
				1.30701
				1.33555
				1.34193
				1.40237
				1.39996
				1.30637
				1.34717
				1.28037
				1.28487
				1.37796
				1.24964
				1.33797
				1.38079
				1.33699
				1.30156
				1.34749
				1.37567
				1.35058
				1.38838
				1.21002
				1.28882
				1.44436
				1.27247
				1.19284
				1.3552
				1.3411
				1.31727
				1.25537
				1.38692
				1.33383
				1.35482
				1.45427
				1.30208
				1.29622
				1.43439
				1.3102
				1.26919
				1.28506
				1.26796
				1.28914
				1.34257
				1.27337
				1.3863
				1.35355
				1.30939
				1.41396
				1.39386
				1.34746
				1.311
				1.38836
				1.35677
				1.33851
				1.40975
				1.31548
				1.37521
				1.32858
				1.33917
				1.21992
				1.29906
				1.43633
				1.32717
				1.33868
				1.35888
				1.31786
				1.38416
				1.31527
				1.31092
				1.32751
				1.35605
				1.34383
				1.3823
				1.40477
				1.30304
				1.2834
				1.30104
				1.36424
				1.31538
				1.35559
				1.29057
				1.34773
				1.34834
				1.26299
				1.29843
				1.34424
				1.34786
				1.37054
				1.38094
				1.31073
				1.31228
				1.4253
				1.37676
				1.38426
				1.3401
				1.31997
				1.34025
				1.34335
				1.39316
				1.31047
				1.40026
				1.32226
				1.37786
				1.36394
				1.35532
				1.34474
				1.4261
				1.39689
				1.37702
				1.28484
				1.37566
				1.43016
				1.40476
				1.28992
				1.33562
				1.39802
				1.43016
				1.34879
				1.48801
				1.31069
				1.3972
				1.22184
				1.39037
				1.36299
				1.45821
				1.27194
				1.33624
				1.3896
				1.40295
				1.27864
				1.39332
				1.36101
				1.32567
				1.38144
				1.38313
				1.39416
				1.37193
				1.47964
				1.38713
				1.27658
				1.35411
				1.34739
				1.3281
				1.45348
				1.42484
				1.35128
				1.39225
				1.43095
				1.39404
				1.34034
				1.29725
				1.39335
				1.30254
				1.44884
				1.28406
				1.37421
				1.39599
				1.41701
				1.32828
				1.37092
				1.31247
				1.30526
				1.38953
				1.46069
				1.47098
				1.39657
				1.27202
				1.38386
				1.36907
				1.43622
				1.33357
				1.43094
				1.4101
				1.22832
				1.43759
				1.38546
				1.42746
				1.42839
				1.31418
				1.38361
				1.43127
				1.3778
				1.51359
				1.43399
				1.39841
				1.368
				1.38239
				1.43859
				1.36981
				1.40601
				1.3472
				1.41617
				1.38861
				1.38624
				1.41141
				1.35033
				1.38699
				1.42953
				1.42864
				1.41409
				1.33428
				1.45967
				1.3037
				1.48039
				1.48236
				1.41047
				1.44372
				1.44085
				1.44446
				1.45322
				1.4702
				1.4412
				1.35034
				1.37688
				1.37764
				1.42079
				1.50364
				1.50125
				1.49819
				1.45599
				1.39259
				1.38429
				1.47572
				1.43014
				1.4747
				1.43657
				1.44929
				1.41324
				1.38038
				1.45505
				1.39098
				1.47863
				1.4278
				1.43299
				1.35464
				1.38953
				1.34574
				1.39834
				1.33654
				1.3786
				1.49394
				1.44601
				1.33277
				1.39578
				1.42602
				1.39113
				1.50624
				1.39604
				1.43579
				1.50696
				1.41506
				1.49849
				1.39213
				1.3505
				1.52375
				1.46943
				1.41652
				1.34049
				1.45786
				1.44931
				1.38823
				1.45019
				1.49481
				1.39626
				1.41718
				1.44377
				1.4062
				1.45967
				1.56427
				1.45019
				1.41783
				1.49026
				1.34591
				1.44517
				1.52462
				1.46408
				1.44334
				1.42835
				1.42474
				1.41754
				1.53557
				1.44257
				1.37111
				1.53235
				1.45701
				1.45663
				1.44172
				1.44539
				1.61601
				1.48499
				1.5197
				1.43582
				1.47698
				1.40835
				1.43773
				1.41673
				1.41243
				1.51561
				1.41113
				1.39693
				1.3699
				1.39544
				1.46639
				1.51996
				1.47369
				1.44673
				1.49511
				1.51703
				1.39717
				1.4556
				1.46522
				1.50266
				1.48045
				1.37765
				1.46114
				1.56091
				1.39233
				1.5159
				1.33625
				1.51012
				1.5026
				1.50221
				1.39551
				1.50293
				1.50695
				1.45888
				1.39123
				1.57241
				1.5187
				1.3085
				1.60324
				1.44969
				1.50533
				1.52601
				1.43216
				1.52486
				1.44176
				1.45912
				1.53027
				1.38139
				1.35859
				1.54729
				1.50319
				1.49868
				1.36017
				1.4036
				1.46915
				1.43827
				1.45998
				1.38128
				1.44421
				1.44611
				1.4045
				1.48254
				1.51422
				1.499
				1.56539
				1.49125
				1.4715
				1.54146
				1.51437
				1.66091
				1.49193
				1.59307
				1.50033
				1.37814
				1.5621
				1.56921
				1.43683
				1.42548
				1.48061
				1.48401
				1.44178
				1.39589
				1.40805
				1.5427
				1.59793
				1.42015
				1.42746
				1.50898
				1.56584
				1.42908
				1.39392
				1.48852
				1.4833
				1.54025
				1.50558
				1.52931
				1.44718
				1.44694
				1.43343
				1.45044
				1.45557
				1.44024
				1.47391
				1.58881
				1.59732
				1.57556
				1.603
				1.39667
				1.42415
				1.43916
				1.57274
				1.49537
				1.45265
				1.49901
				1.62421
				1.57821
				1.53971
				1.37113
				1.50891
				1.47289
				1.57753
				1.56884
				1.50965
				1.4502
				1.48574
				1.51095
				1.48598
				1.53732
				1.60646
				1.62053
				1.45817
				1.63594
				1.53221
				1.4225
				1.46482
				1.56216
				1.49574
				1.55229
				1.47576
				1.45037
				1.55588
				1.54946
				1.49246
				1.51441
				1.44736
				1.40563
				1.52314
				1.44193
				1.51417
				1.48429
				1.51298
				1.46012
				1.51985
				1.51138
				1.59734
				1.5992
				1.54191
				1.40819
				1.53571
				1.58137
				1.4508
				1.56838
				1.50028
				1.49103
				1.59028
				1.50823
				1.54357
				1.66541
				1.42198
				1.54588
				1.5399
				1.64005
				1.42366
				1.67274
				1.56451
				1.55606
				1.53896
				1.40084
				1.43691
				1.44377
				1.5062
				1.53372
				1.50898
				1.51783
				1.58933
				1.49198
				1.50621
				1.39438
				1.45802
				1.51007
				1.42441
				1.5206
				1.52344
				1.57649
				1.62899
				1.50067
				1.57276
				1.50433
				1.59101
				1.65636
				1.41705
				1.68935
				1.48653
				1.4629
				1.40448
				1.50376
				1.58694
				1.52331
				1.55581
				1.59729
				1.59489
				1.59112
				1.53128
				1.68127
				1.61393
				1.54243
				1.53917
				1.64539
				1.4411
				1.55336
				1.59994
				1.67393
				1.55036
				1.55357
				1.53008
				1.52853
				1.4962
				1.5446
				1.59517
				1.45291
				1.52763
				1.56053
				1.52501
				1.3678
				1.49169
				1.58551
				1.56617
				1.55156
				1.61451
				1.53066
				1.5923
				1.57852
				1.58006
				1.50104
				1.6988
				1.45478
				1.57852
				1.5731
				1.58363
				1.66053
				1.54104
				1.58437
				1.58175
				1.60523
				1.73806
				1.6102
				1.57428
				1.52559
				1.54357
				1.60322
				1.55172
				1.47393
				1.66216
				1.51098
				1.50292
				1.58596
				1.68842
				1.72125
				1.55422
				1.53409
				1.57997
				1.66715
				1.44782
				1.60438
				1.42839
				1.64275
				1.57969
				1.62549
				1.69277
				1.61635
				1.57841
				1.51369
				1.55586
				1.58323
				1.6107
				1.60079
				1.6744
				1.6497
				1.66534
				1.69871
				1.46026
				1.58507
				1.59606
				1.64749
				1.61453
				1.62475
				1.67243
				1.58418
				1.63308
				1.53003
				1.57073
				1.65709
				1.54436
				1.60125
				1.68439
				1.64767
				1.62624
				1.61218
				1.62147
				1.52796
				1.63113
				1.56514
				1.60249
				1.55185
				1.51363
				1.65641
				1.58366
				1.52553
				1.53148
				1.67816
				1.65499
				1.66177
				1.63649
				1.68068
				1.64791
				1.51415
				1.58028
				1.58047
				1.51382
				1.68209
				1.59282
				1.57304
				1.73093
				1.64831
				1.57158
				1.53717
				1.63926
				1.49728
				1.54176
				1.60685
				1.64079
				1.67823
				1.64252
				1.58118
				1.73916
				1.6822
				1.5926
				1.70619
				1.64024
				1.64553
				1.6201
				1.66726
				1.58725
				1.48501
				1.57812
				1.49845
				1.62979
				1.5838
				1.59116
				1.76035
				1.51171
				1.44733
				1.5471
				1.56824
				1.6832
				1.56734
				1.62582
				1.64724
				1.46071
				1.67041
				1.64767
				1.62544
				1.7294
				1.55948
				1.62237
				1.61155
				1.78055
				1.68871
				1.68526
				1.57584
				1.68004
				1.58918
				1.64252
				1.7044
				1.60172
				1.63354
				1.60807
				1.59336
				1.67188
				1.64704
				1.72178
				1.62713
				1.71068
				1.67555
				1.66483
				1.64693
				1.63801
				1.69001
				1.6358
				1.6662
				1.75635
				1.65361
				1.59302
				1.62562
				1.65037
				1.69042
				1.74683
				1.58216
				1.63001
				1.66203
				1.61359
				1.60526
				1.6958
				1.68816
				1.57227
				1.74109
				1.70093
				1.71456
				1.70832
				1.57419
				1.67408
				1.64992
				1.64928
				1.70891
				1.78671
				1.62172
				1.67776
				1.67961
				1.72534
				1.67846
				1.85204
				1.63169
				1.54491
				1.64817
				1.75951
				1.63749
				1.83449
				1.74863
				1.76782
				1.6249
				1.72657
				1.64378
				1.81174
				1.66525
				1.70422
				1.65355
				1.79699
				1.60864
				1.70519
				1.60909
				1.77424
				1.6201
				1.70743
				1.74455
				1.69993
				1.75978
				1.82044
				1.70735
				1.62346
				1.6704
				1.68056
				1.72148
				1.76963
				1.71087
				1.71769
				1.79517
				1.80745
				1.69573
				1.77236
				1.77924
				1.67434
				1.79112
				1.66646
				1.6659
				1.66327
				1.79275
				1.70773
				1.70604
				1.78046
				1.72581
				1.7347
				1.73599
				1.69217
				1.69972
				1.80934
				1.7283
				1.67228
				1.67427
				1.70688
				1.78647
				1.79087
				1.76458
				1.75387
				1.76941
				1.76981
				1.64508
				1.88324
				1.87994
				1.79847
				1.64369
				1.74392
				1.75427
				1.72327
				1.86737
				1.79709
				1.68044
				1.80568
				1.76541
				1.76777
				1.74016
				1.68738
				1.85631
				1.73134
				1.75964
				1.69176
				1.82276
				1.7767
				1.85072
				1.84529
				1.67673
				1.77553
				1.77777
				1.76235
				1.70785
				1.81091
				1.75522
				1.86809
				1.64387
				1.64715
				1.77751
				1.74825
				1.69501
				1.738
				1.74106
				1.66433
				1.77584
				1.65135
				1.77408
				1.74572
				1.6532
				1.77731
				1.8828
				1.77484
				1.68131
				1.81159
				1.78024
				1.71189
				1.81021
				1.77363
				1.81082
				1.75105
				1.8737
				1.81628
				1.69632
				1.8119
				1.84686
				1.76528
				1.72578
				1.74901
				1.85885
				1.69967
				1.81964
				1.68518
				1.73059
				1.75503
				1.68624
				1.72411
				1.72987
				1.66081
				1.71184
				1.8132
				1.74259
				1.70224
				1.70914
				1.62764
				1.84667
				1.82652
				1.71855
				1.735
				1.8273
				1.6696
				1.83138
				1.71669
				1.74565
				1.80619
				1.70409
				1.84108
				1.74789
				1.73857
				1.69305
				1.66511
				1.88664
				1.74793
				1.66271
				1.73002
				1.79957
				1.63866
				1.8789
				1.75867
				1.74927
				1.74005
				1.82524
				1.91893
				1.72296
				1.82834
				1.75377
				2.02623
				1.73989
				1.75283
				1.83002
				1.8244
				1.78097
				1.86366
				1.90181
				1.78582
				1.84449
				1.77466
				1.86905
				1.87247
				1.92107
				1.80092
				1.90765
				1.83591
				1.82742
				1.69419
				1.87722
				1.85676
				1.80698
				1.85103
				1.8957
				1.87453
				1.7571
				1.75552
				1.78445
				1.79888
				1.74905
				1.72875
				1.77856
				1.87
				1.91922
				1.79374
				1.79494
				1.7905
				1.6655
				1.76097
				1.82682
				1.84302
				1.78984
				1.90989
				1.87169
				1.68316
				1.93247
				1.86674
				1.8226
				1.78159
				1.80036
				1.9386
				1.77556
				1.73562
				1.71116
				1.85505
				1.82618
				1.83981
				1.78169
				1.81023
				1.9221
				1.74146
				1.88246
				1.78893
				1.89383
				1.93464
				1.76344
				1.74731
				1.81398
				1.7427
				1.72683
				1.89249
				1.82283
				1.82295
				1.769
				1.74156
				1.93031
				1.90667
				1.86689
				1.73642
				1.87023
				1.8833
				1.90588
				1.82692
				1.88678
				1.82689
				1.78439
				1.92976
				1.91363
				1.90477
				1.75698
				1.84105
				1.79433
				1.8501
				1.80421
				1.81747
				1.96312
				1.87277
				1.8015
				1.77736
				1.6687
				1.94651
				1.76224
				1.91907
				1.84025
				1.91772
				1.81932
				1.84962
				1.81462
				1.74893
				1.81257
				1.90566
				1.74832
				1.87944
				1.82001
				1.78599
				1.84259
				1.95583
				1.80875
				1.98776
				1.73853
				1.90934
				1.81706
				1.89415
				1.78894
				1.79993
				1.79939
				1.76714
				1.92056
				1.85752
				1.89065
				1.80802
				1.85233
				1.90109
				1.91869
				1.86914
				1.87912
				1.88443
				1.97345
				1.86579
				1.91532
				1.78163
				2.0678
				1.84871
				2.03697
				1.81439
				1.84556
				1.95193
				2.0235
				1.91145
				1.96044
				1.99981
				1.93527
				1.72649
				1.99875
				1.96504
				1.82939
				1.97248
				1.78633
				2.01532
				1.97889
				1.87354
				1.94648
				1.82329
				1.83486
				1.93023
				1.78066
				1.98738
				1.77319
				1.77149
				1.76253
				1.92032
				1.74016
				1.90194
				1.82527
				1.83013
				1.87133
				1.8977
				1.85505
				1.83618
				2.04141
				1.89114
				1.86998
				1.98928
				1.79756
				1.90037
				2.00246
				2.0116
				1.9441
				1.97557
				1.88091
				1.84996
				1.86642
				1.94222
				1.85879
				1.9884
				1.82772
				1.95782
				1.86493
				1.97094
				1.99528
				1.74454
				1.89693
				1.89446
				1.97435
				1.94108
				1.92968
				2.06775
				1.77172
				1.78721
				1.81076
				1.93043
				2.03234
				2.11291
				1.83866
				1.83185
				2.06021
				1.87306
				2.15832
				1.90166
				2.05973
				1.90002
				1.97103
				2.02178
				2.12128
				1.93546
				2.02622
				2.07118
				2.02738
				1.90756
				1.89806
				1.8587
				1.98156
				2.07927
				2.16082
				1.90561
				1.88217
				2.0154
				1.98409
				2.03728
				1.9451
				2.06758
				2.09716
				2.02011
				1.89491
				1.91481
				2.00174
				1.98463
				1.95383
				2.02236
				1.92285
				1.87615
				1.92481
				2.00371
				1.95299
				2.24803
				2.03889
				2.02934
				2.27675
				2.0692
				1.95612
				2.07496
				2.07504
				2.09233
				1.85326
				1.97485
				1.86022
				1.9017
				2.09018
				2.11661
				1.99519
				1.89239
				1.97217
				1.94409
				2.07844
				2.07454
				2.02718
				2.04096
				2.10428
				1.91736
				2.03742
				1.94843
				1.98066
				2.05247
				2.10825
				2.12566
				1.90131
				1.97642
				2.11902
				1.89111
				2.05
				1.88774
				2.08988
				1.92036
				1.87662
				2.00215
				2.00519
				2.06814
				1.96444
				1.98907
				2.02925
				2.11373
				2.00275
				2.01637
				2.07948
				1.89555
				1.99496
				1.90645
				2.09351
				2.02816
				1.99541
				2.087
				2.17775
				1.96947
				1.95791
				1.96637
				2.07759
				2.03569
				1.99443
				1.98869
				1.96443
				2.00533
				2.0677
				2.03317
				2.06646
				1.98422
				2.08114
				2.05113
				2.03157
				2.07015
				2.04813
				2.11358
				2.13529
				1.88516
				1.96651
				2.06274
				2.05787
				2.01319
				2.01995
				2.09027
				2.09462
				2.05563
				1.83082
				1.95404
				1.98031
				2.0547
				2.1487
				2.01172
				1.98198
				2.00895
				1.95837
				2.03905
				2.06048
				2.07435
				2.22227
				1.92263
				1.9714
				2.04094
				2.01614
				2.02217
				1.87295
				1.96038
				1.85547
				1.87831
				2.02503
				2.01773
				2.349
				2.03672
				2.02192
				2.08403
				1.9047
				2.14059
				1.99586
				1.97682
				2.07477
				2.18587
				2.05064
				2.06312
				2.00127
				1.9176
				1.97251
				2.08258
				2.09983
				2.12142
				1.90083
				2.029
				2.13721
				2.08982
				2.20076
				2.10925
				2.01441
				2.03765
				1.9051
				2.01394
				2.03416
				1.96559
				2.22469
				2.0873
				2.00055
				2.19111
				2.13662
				2.10516
				2.07782
				2.02348
				2.02042
				2.00902
				2.07363
				2.07333
				2.05789
				2.04387
				2.10037
				2.0564
				2.14905
				2.25472
				2.11585
				2.00385
				2.11686
				2.13709
				1.86297
				2.01476
				2.07278
				2.02217
				1.9938
				2.2088
				2.08612
				1.97855
				2.10843
				1.9593
				1.9847
				2.01376
				2.09847
				1.96989
				2.09356
				2.12464
				2.23637
				2.00577
				2.11307
				2.15721
				2.0158
				2.12548
				2.18165
				2.03459
				2.04845
				2.14656
				2.18104
				2.08418
				2.02729
				2.11677
				2.14535
				2.10102
				2.08624
				1.97143
				2.05733
				2.17563
				2.01645
				2.03942
				2.0809
				2.01974
				2.20012
				2.11718
				1.84522
				2.11195
				2.18948
				2.02899
				1.98371
				2.11122
				2.11923
				2.07041
				2.20484
				2.08206
				2.11117
				2.16078
				2.14974
				1.89522
				2.19939
				2.03037
				1.95474
				2.11776
				2.17354
				2.04317
				2.01136
				2.02896
				2.0337
				2.24199
				2.16614
				2.19619
				2.12856
				2.12896
				2.12967
				2.13785
				2.10058
				2.01147
				2.07683
				2.11032
				2.01797
				1.99129
				2.15675
				2.12324
				2.03992
				2.09855
				2.1128
				2.13568
				2.29076
				2.07321
				2.07914
				2.02322
				2.04738
				2.22694
				2.08542
				2.16559
				2.13778
				1.94543
				2.10919
				2.06762
				1.99653
				2.07368
				2.02919
				2.14987
				2.03942
				2.238
				2.13492
				2.13537
				2.05088
				2.30643
				2.11254
				2.06566
				2.17238
				2.10543
				2.19142
				2.17754
				2.09168
				2.15928
				2.20301
				2.10809
				2.15993
				2.09414
				2.05598
				2.19574
				2.09918
				2.10483
				2.19036
				2.22697
				2.34196
				2.10852
				2.12706
				2.24474
				2.08457
				2.15622
				2.15683
				2.23052
				2.06899
				2.16231
				2.17667
				2.2073
				2.18039
				2.25084
				2.23026
				2.17893
				2.13023
				2.23503
				2.12281
				2.26873
				2.15234
				2.12301
				2.17847
				2.07282
				2.07763
				2.3783
				2.16368
				2.09074
				2.11849
				2.10543
				1.92965
				1.99621
				2.03165
				2.14236
				2.14812
				2.03923
				2.10675
				2.10755
				2.13163
				1.97311
				2.08021
				2.1905
				2.13651
				2.12021
				2.26282
				2.18789
				2.41889
				2.21282
				2.2171
				2.25648
				2.21571
				2.06095
				2.21537
				2.11245
				2.0986
				2.29662
				2.3236
				2.20386
				2.13875
				2.07283
				2.1706
				2.19152
				2.00302
				2.21316
				2.00505
				2.15349
				2.1678
				2.0633
				2.07283
				2.15339
				2.11708
				2.08483
				2.12983
				2.09305
				2.27922
				2.18933
				2.10986
				2.19589
				2.30758
				2.20555
				2.11031
				2.27575
				2.17333
				2.14807
				2.11837
				2.17487
				2.07648
				2.13619
				2.09731
				2.0784
				2.30834
				2.07512
				2.3135
				2.16975
				2.27839
				2.19236
				2.13579
				2.09052
				2.24714
				2.13722
				2.17805
				2.15417
				2.09431
				2.112
				2.24333
				2.12535
				1.92189
				2.08807
				2.23685
				2.12601
				2.24489
				2.19684
				2.01197
				2.23978
				2.10923
[truncated: 297 more rows]

## Sheet: Figure 5H
			Sigmoid type		Linear type
			0.0432887		0.000539216
			0.00466751		0.000437232
			0.0170982		0.000271893
			0.0575265		0.000291366
			0.00184092		0.000444866
			0.0056178
