# Supplementary material for: Kinetics of blood cell differentiation during hematopoiesis revealed by quantitative long-term live imaging
Source: eLife. 2023 Mar 31;12:e84085. doi: 10.7554/eLife.84085 (PMC10065797; doi:10.7554/eLife.84085)
Supplement: Figure 6—figure supplement 1—source data 1. [file elife-84085-fig6-figsupp1-data1.xlsx]

## Sheet: Figure 6 figure supplement 1
	ex vivo - infection				in vivo - infection						Table Analyzed	Diff infection ex vivo versus in vivo for ANOVA
	0hr	3hr	6hr	12hr	0hr	3hr	6hr	12hr
	1.03448	1.06024	0.876289	0.807339	0.967568	0.538012	0.915088	0.811404			Two-way ANOVA	Ordinary
	0.720339	0.608392	0.638298	0.652174	0.961644	0.395028	0.825811	0.81686			Alpha	0.05
	0.710145	0.477876	0.77551	0.778947	0.829162	0.501031	0.940171	0.868078
	0.725	0.702899	0.75969	0.619048	0.91355	0.409628	0.348245	0.74505			Source of Variation	% of total variation	P value	P value summary	Significant?
	0.619835	0.630769	0.82906	0.601626	0.631961	0.574468	0.659591	0.736013			Interaction	5.447	0.2695	ns	No
	0.978417	0.801205	0.664804	0.568528	0.615561	0.364238	0.75161	0.908547			Time (0, 3, 6, 12hr)	4.974	0.3087	ns	No
					0.604354	0.7024	0.572816	0.861456			Tissue culture (ex vivo or in vivo)	0.03125	0.8798	ns	No
					0.666153	0.91311	0.687767	0.71351
					0.638649	0.852941	0.456173	0.686076			ANOVA table	SS	DF	MS	F (DFn, DFd)	P value
					0.738278	0.556657	0.957516	0.847625			Interaction	0.09529	3	0.03176	F (3, 66) = 1.338	P = 0.2695
					0.758255	0.641304	0.877378	0.753103			Time	0.08702	3	0.02901	F (3, 66) = 1.222	P = 0.3087
					0.765595	0.859722		0.76399			Tissue culture	0.0005466	1	0.0005466	F (1, 66) = 0.02303	P = 0.8798
						0.880165		0.825569			Residual	1.566	66	0.02373
						0.737691
											Compare each cell mean with the other cell mean in that row.
											Number of families	1
											Number of comparisons per family	4
											Alpha	0.05
											Sidak's multiple comparisons test	Mean Diff.	95% CI of diff.	Significant?	Summary	Adjusted P Value
											ex vivo - in vivo
											0	0.04048	-0.1568 to 0.2377	No	ns	0.9747
											3	0.07596	-0.1165 to 0.2685	No	ns	0.781
											6	0.03071	-0.1695 to 0.2309	No	ns	0.9914
											12	-0.1239	-0.3186 to 0.07081	No	ns	0.3669
											Test details	Mean 1	Mean 2	Mean Diff.	SE of diff.	N1	N2	t	DF
											ex vivo - in vivo
											0	0.798	0.7576	0.04048	0.07703	6	12	0.5254	66
											3	0.7136	0.6376	0.07596	0.07517	6	14	1.011	66
											6	0.7573	0.7266	0.03071	0.07819	6	11	0.3928	66
											12	0.6713	0.7952	-0.1239	0.07604	6	13	1.629	66
