# Supplementary material for: Kinetics of blood cell differentiation during hematopoiesis revealed by quantitative long-term live imaging
Source: eLife. 2023 Mar 31;12:e84085. doi: 10.7554/eLife.84085 (PMC10065797; doi:10.7554/eLife.84085)
Supplement: Figure 6—source data 1. [file elife-84085-fig6-data1.xlsx]

## Sheet: Figure 6A
		Wt diff events	Inf diff events			Column B	Inf diff events
		0.106407	0.233433			vs.	vs.
		0.278927	0.35015			Column A	Wt diff events
		0.470069	0.52543
		0.143872	0.152129			Mann Whitney test
		0.127383	0.71682			P value	0.0117
		0.127383	1.577			Exact or approximate P value?	Exact
		0.138526				P value summary	*
		0.108506				Significantly different? (P < 0.05)	Yes
						One- or two-tailed P value?	Two-tailed
						Sum of ranks in column A,B	41.00 , 64.00
						Mann-Whitney U	5
						Difference between medians
						Median of column A	0.133
						Median of column B	0.4378
						Difference: Actual	0.3048
						Difference: Hodges-Lehmann	0.2427

## Sheet: Figure 6B
	Linear diff	Sigmoid diff	Linear diff	Sigmoid diff		Column A	Linear diff		Column B	Sigmoid diff
	0.106407	0	0.233433	0		vs.	vs.		vs.	vs.
	0	0.278927	0.233433	0.116717		Column C	Linear diff		Column D	Sigmoid diff
	0.470069	0	0.350287	0.175143
	0.143872	0	0	0.152129		Kolmogorov-Smirnov test			Kolmogorov-Smirnov test
	0	0.127383	0.286728	0.430092		P value	0.0426		P value	0.1592
	0	0.127383	1.29028	0.286728		Exact or approximate P value?	Exact		Exact or approximate P value?	Exact
	0	0.138526				P value summary	*		P value summary	ns
	0	0.108506				Significantly different? (P < 0.05)	Yes		Significantly different? (P < 0.05)	No
						Kolmogorov-Smirnov D	0.7083		Kolmogorov-Smirnov D	0.5417
