# Supplementary material for: Kinetics of blood cell differentiation during hematopoiesis revealed by quantitative long-term live imaging
Source: eLife. 2023 Mar 31;12:e84085. doi: 10.7554/eLife.84085 (PMC10065797; doi:10.7554/eLife.84085)
Supplement: Figure 7—figure supplement 2—source data 1. [file elife-84085-fig7-figsupp2-data1.xlsx]

## Sheet: Figure 7 figure supplement 2A
		eater-dsRed
		Raw intensity		Normalizaed intensity
		Start	End	Start	End
		31.503	35.395	0.452886	0.602452
		58.48	59.893	0.738819	0.765779
		33.593	32.333	0.704886	0.669804
		28.706	33.119	0.583972	0.744358
		19.723	19.955	0.494661	0.505871
		13.7049	11.4126	0.710866	0.544338

## Sheet: Figure 7 figure supplement 2B
		dome-MESO-GFP
		Raw intensity		Normalizaed intensity
		Start	End	Start	End
		41.401	24.825	0.833256	0.196257
		52.497	25.322	0.624666	0.106178
		37.802	18.102	0.82208	0.273563
		24.102	17.299	0.416646	0.169399
		26.983	12.559	0.84547	0.14849
		14.3725	6.02865	1.04413	0.437968

## Sheet: Figure 7 figure supplement 2C
		eater-dsRed
		Raw intensity		Normalizaed intensity
		Start	End	Start	End
		30.237	30.384	0.651741	0.655425
		15.424	27.305	0.108532	0.252078
		7.847	17.955	0.230934	0.563357
		1.357	19.678	0.0119164	0.299937
		45.891	55.225	0.56765	0.738612
		6.537	9.881	0.159586	0.252011

## Sheet: Figure 7 figure supplement 2D
		dome-MESO-GFP
		Raw intensity		Normalizaed intensity
		Start	End	Start	End
		37.446	7.107	0.832373	0.0721874
		79.797	27.299	0.886285	0.252006
		25.051	9.893	0.796724	0.298221
		49.86	1.073	0.774422	0.00745166
		57.209	44.86	0.774951	0.548766
		28.333	1.401	0.762002	0.0176336

## Sheet: Figure 7 figure supplement 2E
		eater-dsRed
		Raw intensity		Normalizaed intensity
		Start	End	Start	End
		51.938	50.141	0.937858	0.892316
		24.558	15.915	0.6771	0.37072
		42.328	40.96	0.731486	0.698498
		36.531	39.446	0.858432	0.936976
		20.876	33.023	0.201407	0.566499
		20.921	25.147	0.514186	0.667903
		30.26	32.847	0.4991	0.554555
		13.367	28.514	0.219806	0.684938
		25.215	28.299	0.568743	0.654505
		28.093	33.558	0.464882	0.629407
		22.481	29.674	0.480897	0.728931
		20.435	30.977	0.364895	0.773817
		25.859	21.763	0.699798	0.549071

## Sheet: Figure 7 figure supplement 2F
		dome-MESO-GFP
		Raw intensity		Normalizaed intensity
		Start	End	Start	End
		42.277	26.463	0.693015	0.292235
		17.659	7.054	0.432542	0.0566111
		33.701	13.983	0.523451	0.0479635
		32.181	22.542	0.741223	0.481502
		22.175	20.859	0.24045	0.200896
		30.718	15.266	0.870544	0.30849
		37.073	15.898	0.645145	0.191233
		29.627	20.062	0.719116	0.425395
		35.881	14.085	0.86535	0.259232
		41.984	25.357	0.883072	0.382515
		31.496	21.434	0.791759	0.444793
		23.525	20.237	0.484756	0.357215
		22.836	10.915	0.588556	0.14988

## Sheet: Figure 7 figure supplement 2G
		eater-dsRed
		Raw intensity		Normalizaed intensity
		Start	End	Start	End
		5.496	45.186	0.111472	0.917655
		25.589	26.589	0.587819	0.629166
		19.429	43.593	0.113693	0.740353
		25.961	35.488	0.335847	0.635155
		8	13.514	0.159045	0.32943
		37.819	26.734	0.442364	0.268255
		1.679	12.394	0.0345392	0.331798

## Sheet: Figure 7 figure supplement 2H
		dome-MESO-GFP
		Raw intensity		Normalizaed intensity
		Start	End	Start	End
		22.527	5.636	0.457406	0.114316
		25.527	16.364	0.585256	0.2064
		23.136	24.599	0.209829	0.24777
		26.589	16.93	0.355577	0.0521206
		24.684	9.401	0.674588	0.202336
		69.667	10.079	0.942592	0.0066597
		36.285	7.977	0.99459	0.20926
