# Supplementary material for: Kinetics of blood cell differentiation during hematopoiesis revealed by quantitative long-term live imaging
Source: eLife. 2023 Mar 31;12:e84085. doi: 10.7554/eLife.84085 (PMC10065797; doi:10.7554/eLife.84085)
Supplement: Figure 7—source data 1. [file elife-84085-fig7-data1.xlsx]

## Sheet: Figure 7A
			eater-dsRed	dome-MESO-GFP
			7.847	25.051
			4.186	20.819
			2.203	22.78
			3.605	19.729
			3.955	23.497
			4.316	22.593
			4.689	24.181
			3.282	23.689
			3.486	24.305
			4.503	23.277
			6.141	24.113
			3.576	25.486
			4.955	23.983
			3.684	23.401
			5.237	26.429
			3.503	25.147
			4.48	24.983
			4.209	28.345
			6.48	26.966
			5.531	29.847
			4.299	29.955
			4.921	26.949
			5.706	29.797
			5.475	28.808
			3.96	28.169
			4.463	31.232
			5.164	29.079
			3.904	29.119
			7.282	30.418
			3.78	28.446
			4.198	26.395
			4.469	26.751
			4.102	25.136
			4.226	21.226
			4.119	24.237
			4.441	23.446
			4.989	21.74
			5.04	23.785
			5.305	25.718
			3.469	24.395
			3.249	25.124
			4.311	25.893
			3.492	25.554
			2.554	23.277
			2.559	24.362
			4.808	25.079
			4.26	25.672
			3.542	24.424
			4.209	21.797
			3.729	22.571
			4.22	23.503
			4.452	26.367
			5.158	24.667
			5.927	24.237
			3.469	22.791
			4.26	22.079
			5.136	24.119
			4.249	24.853
			4.395	25.582
			3.39	24.056
			3.695	24.627
			3.412	23.734
			4.537	25.588
			4.757	23.96
			3.226	25.542
			5.175	24.006
			3.734	22.26
			4.164	21.537
			2.859	22.26
			3.164	20.096
			3.113	22.068
			4.277	21.994
			2.299	22.757
			4.379	22.119
			4.898	21.881
			3.74	17.989
			5.119	20.797
			4.09	19.881
			3.831	20.169
			3.672	18.61
			3.576	21.898
			2.723	20.39
			3.356	20.853
			3.181	21.554
			5.04	19.864
			4.136	17.977
			5.723	18.469
			4.418	19.384
			2.616	20.051
			3.124	22.113
			3.831	22.582
			5.955	25.119
			3.124	23.068
			6.232	24.78
			3.706	21.379
			5.814	23.48
			4.119	22.508
			3.842	20.424
			4.966	19.311
			3.379	20.136
			4.085	18.508
			3.051	16.633
			4.898	19.305
			3.576	19.819
			3.672	20.994
			3.322	20.537
			4.932	20.977
			4.153	21.322
			3.859	22.09
			4.52	22.475
			3.48	20.107
			3.819	19.051
			5.186	19.859
			4.294	19.576
			4.638	19.599
			4.011	20.695
			3.418	18.836
			2.91	18.881
			4.237	19.266
			4.441	20.52
			3.469	21.559
			3.605	20.864
			4.469	20.107
			4.271	22.153
			2.977	22.164
			4.186	20.706
			4.158	21.537
			3.48	19.362
			4.864	22.966
			3.056	23.661
			3.825	21.638
			4.401	22.147
			3.571	21.362
			3.113	18.582
			3.774	16.938
			2.61	16.514
			3.605	18.266
			4.588	17.226
			3.305	15.412
			3.74	14.87
			1.96	14.994
			3.034	14.944
			1.949	14.565
			3.153	16.695
			2.186	16.04
			2.616	15.141
			1.983	16.734
			2.164	14.345
			3.22	13.548
			2.836	17.525
			2.243	15.39
			2.237	16.271
			3.373	16.751
			3.514	18.339
			2.531	19.588
			3.294	20.356
			2.147	16.299
			2.994	16.864
			2.576	15.011
			3.158	17.181
			2.435	17.266
			3.593	17.13
			2.023	17.226
			2.768	18.356
			3.266	16.582
			4.847	15.904
			2.876	16.401
			2.463	20.367
			3.407	16.887
			4.237	18.266
			3.062	17.904
			3.542	20.678
			3.955	20.814
			3.023	20.588
			3.186	20.588
			4	17.548
			3.124	19.644
			4.322	19.068
			3.944	20.61
			3.576	20.994
			3.605	18.576
			2.927	19.932
			4.237	19.124
			2.311	17.819
			2.571	16.113
			2.531	19.379
			2.39	17.113
			1.599	16.367
			2.328	17.955
			2.13	19.751
			3.734	23.87
			3.537	23.565
			4.09	22.644
			2.011	23.373
			3.345	21.537
			2.435	23.96
			2.751	22.079
			2.181	23.023
			4.056	22.407
			3.881	24.379
			3.017	23.243
			3.011	23.774
			3.938	20.593
			3.797	19.616
			3.458	20.147
			1.915	20.853
			3.554	22.503
			3.164	20.271
			2.593	21.26
			2.514	21.751
			3.164	21.576
			3.254	21.209
			3.153	21.395
			2.91	22.073
			2.921	21.548
			1.751	18.955
			2.898	21
			3.073	22.599
			2.638	20.746
			3.712	23.78
			3.729	24.638
			3.079	23.254
			2.774	23.763
			5.028	23.599
			3.746	22.74
			3.537	22.65
			2.299	20.237
			2.203	16.915
			4.017	18.028
			1.475	19.22
			2.605	18.429
			2.864	18.079
			2.814	16.26
			1.864	16.13
			3.316	19.22
			4.638	20.056
			2.91	18.243
			2.362	21.723
			4.328	20.237
			3.186	22.486
			3.452	21.164
			3.582	21.006
			4.04	19.836
			2.655	19.593
			2.068	18.768
			2.734	19.74
			4.22	19.294
			3.554	23.136
			3.441	21.232
			2.655	21.52
			3.825	19.876
			3.028	20.48
			2.791	21.13
			3.463	20.949
			2.898	21.921
			3.175	20.35
			2.531	19.751
			3.847	20.808
			3.418	21.938
			2.729	22.825
			2.87	20.751
			2.514	19.689
			2.898	18.169
			3.61	19.723
			2.379	20.531
			2.994	16.237
			1.768	15.203
			2.175	15.825
			2.299	12.864
			2.158	13.215
			2.757	15.339
			2.96	15.226
			1.429	14.079
			3.068	15.593
			2.136	15.955
			3.09	14.938
			1.938	13.277
			2.932	16.441
			2.876	14.475
			2.706	15.339
			2.362	19.836
			3.463	18.164
			2.542	18.876
			3.441	19.384
			4.215	18.904
			2.718	21.232
			2.859	21.616
			2.367	18.729
			2.13	20.87
			2.751	17.362
			2.497	17.486
			3.87	19.102
			3.266	18.023
			3.328	20.819
			3.638	20.774
			2.689	18.955
			3.294	18.864
			4.898	20.853
			2.734	20.525
			2.322	21.136
			2.192	20.181
			2	17.486
			3.045	17.073
			2.791	16.266
			2.65	15.542
			1.299	14.006
			3.514	12.158
			2.22	13.356
			2.554	14.785
			2.362	15.983
			3.814	15.706
			3.938	17.802
			3.463	19.446
			3.638	17.096
			2.35	16.48
			2.023	18.955
			3.531	17.825
			2.011	20.017
			2.938	21.056
			3.48	19.559
			3.209	18.712
			2.768	19.006
			3.395	18.898
			3.638	18.068
			3.525	16.966
			2.723	18.119
			2.734	17.797
			4.627	16.96
			2.712	17.073
			3.808	18.774
			3.345	17.215
			2.571	20.113
			3.418	19.582
			3.588	17.571
			3.107	19.051
			2.249	15.746
			2.915	15.011
			1.881	14.192
			2.102	13.791
			3.249	12.944
			2.576	12.684
			1.814	12.463
			3.09	11.04
			2.328	9.977
			2.881	10.034
			2.486	11.322
			3.661	11.017
			1.887	12.367
			2.944	13.017
			2.588	13.209
			3.853	15.701
			2.994	12.814
			1.932	13.023
			2.068	13.305
			2.808	13.441
			3.271	13.627
			3.266	13.898
			2.689	12.209
			3.113	12.938
			2.136	12.147
			2.339	11.621
			2.599	10.531
			1.028	13.463
			2.249	11.367
			3.073	11.328
			2.328	9.554
			2.316	8.407
			1.881	8.497
			1.881	8.169
			1.565	8.288
			2.695	8.237
			1.729	8.525
			2.695	9.068
			1.819	8.203
			1.418	8.299
			2.124	7.661
			1.435	7.548
			1.96	8.576
			2.345	8.678
			2.062	8.644
			2.395	6.508
			1.938	7.288
			1.26	8
			1.61	8.701
			2.627	8.525
			1.35	8.48
			2.712	8.638
			1.508	7.588
			1.588	7.051
			1.571	6.842
			1.04	7.136
			1.452	7.633
			2.175	8.65
			1.734	6.695
			2.401	8.379
			1.751	7.429
			1.328	7.881
			1.701	6.808
			1.441	7.017
			2.017	6.831
			2.424	6.723
			1.915	7.808
			1.282	7.243
			1.582	8.785
			1.52	8.153
			1.164	7.695
			1.808	6.458
			1.395	7.814
			1.751	6.508
			1.876	6.701
			1.056	7.294
			2.119	6.288
			1.096	7.537
			2.627	6.819
			2.288	7.232
			1.825	7.011
			1.864	5.277
			1.644	6.26
			1.825	5.559
			1.661	6.119
			1.384	7.497
			2.633	6.339
			2.254	6.684
			0.853	7.774
			0.825	7.559
			1.429	7.09
			1.345	7.35
			1.915	5.915
			1.638	7.955
			1.463	8.22
			1.616	8.401
			1.842	8.288
			1.831	6.277
			2.339	8.904
			1.209	8.576
			3.65	8.429
			2.04	9.09
			2.333	8.938
			1.401	7.644
			1.48	7.571
			2.689	6.887
			2.751	8.492
			2.13	9.729
			2.051	8.192
			2.441	8.887
			2.463	9.271
			2.045	8.362
			2.085	8.847
			1.757	8.356
			2.119	6.424
			3.209	6.825
			3.203	5.333
			2.017	7.169
			2.525	6.582
			2.401	6.13
			2.006	6.672
			2.316	6.424
			3.271	6.972
			2.972	6.508
			2.412	6.395
			2.266	6.254
			2.412	7.531
			2.684	5.537
			2.61	5.96
			3.124	6.316
			2.254	7.153
			2.847	6.944
			2.469	7.582
			2.864	5.904
			2.119	6.661
			2.203	5.661
			2.531	5.944
			2.932	5.712
			3.503	6.74
			2.497	7.181
			3.638	5.124
			3.096	5.22
			2.548	5.113
			2.814	4.768
			1.362	5.232
			1.983	5.175
			1.836	6.797
			1.921	5.333
			2.412	5.876
			2.638	6.65
			2.198	8.017
			2.972	9.627
			2.627	9.508
			5.305	9.463
			2.429	9.13
			2.26	8.52
			2.35	8.847
			3.113	7.266
			1.492	7.113
			3.271	8.706
			2.763	8.113
			3.085	7.209
			3.695	6.938
			2.124	7.763
			2.627	6.102
			3.384	5.345
			3.367	6.333
			3.893	6.079
			5.192	4.486
			3.345	6.107
			5.927	6.452
			4.277	6.367
			3.452	6.757
			3.797	7.955
			4.119	7.333
			5.006	7.486
			4.616	7.141
			4.983	7.305
			7.328	7.401
			7.079	7.328
			5.04	8.079
			5.384	7.633
			5.266	7.254
			5.158	6.751
			6.825	7.305
			5.672	7.203
			6.61	7.017
			5.78	5.689
			6.927	5.412
			5.079	5.395
			7.525	6.023
			5.893	7.339
			5.763	7.65
			7.605	7.689
			5.559	6.972
			6.407	7.141
			4.051	8.367
			5.859	7.435
			6.395	6.35
			4.847	6.61
			5.808	5.927
			3.559	7.175
			6.78	6.554
			3.339	7.689
			4.237	6.034
			4.599	6.989
			5.232	6.616
			4.61	6.475
			3.452	8.91
			5.672	7.633
			6.237	8.096
			8.237	6.819
			6.124	9.045
			6.277	7.983
			6.192	8.028
			6.073	8.548
			6.079	9.508
			5.333	9.141
			5.006	9.774
			4.915	10.96
			4.927	8.22
			6.734	8.621
			7.966	6.768
			7.751	8.48
			6.825	7.859
			8.497	8.475
			7.09	8.034
			6.684	7.52
			10.644	7.876
			6.797	8.599
			6.847	9.492
			7.966	8.192
			6.859	8.192
			7.418	8.667
			10.356	8.542
			6.819	7.701
			10.463	7.831
			7.203	7.966
			8.712	8.831
			6.424	8.446
			6.944	7.746
			7.881	9.785
			6.107	8.028
			8.452	9.497
			7.062	7.339
			7.932	7.763
			7.492	9.006
			6.073	9.011
			6.802	9.119
			7.13	9.429
			6.39	10.017
			9.045	8.542
			8.475	8.955
			8.04	8.542
			7.864	8.068
			7.266	8.356
			8.768	8.271
			7.023	8.158
			7.164	7.831
			10.492	8.672
			10.011	8.209
			9.989	8.881
			8.288	9.65
			8.096	7.571
			8.079	8.588
			6.989	8.463
			7.644	7.712
			9.503	8.412
			8.452	8.881
			9.938	8.678
			7.808	6.599
			6.672	6.831
			8.638	6.78
			6.559	6.458
			8.571	7.316
			8.898	6.441
			10.435	6.695
			9.13	7.65
			9.452	7.723
			11.599	7.39
			10.65	6.672
			10.791	7.492
			9.599	7.746
			8.288	6.791
			10.605	8.141
			9.791	8.571
			10.932	7.785
			11.554	6.797
			9.35	7.633
			9.554	7.661
			11.503	8.266
			8.39	8.096
			8.073	6.955
			10.599	8.718
			12.475	7.045
			9.864	8.514
			12.011	7.542
			12.04	8.831
			12.695	8.266
			11.452	8.475
			12.13	7.87
			9.588	6.328
			12.475	7.831
			10.362	8.113
			14.192	7.78
			9.661	6.751
			10.74	7.288
			9.678	8.164
			13.062	7.418
			13.299	8.345
			13.938	7.282
			11.678	7.576
			10.181	8.469
			12.051	8.638
			11.661	8.164
			11.379	8.514
			12.633	9.136
			10.593	8.712
			13.571	7.678
			8.853	7.887
			11.605	7.655
			10.136	7.994
			10.458	6.876
			11.537	8.288
			9.944	7.814
			10.548	8.333
			10.13	8.525
			11.898	9.554
			14.085	8.362
			13.04	9.678
			13.853	8.718
			12.706	7.452
			12.712	10.209
			11.695	9.345
			12.011	9.537
			14.39	9.056
			11.695	9.04
			11.339	9.198
			13.147	10.718
			14.164	9.695
			15.548	9.305
			11.689	10.299
			14.881	9.621
			11.571	9.011
			13.299	8.706
			12.938	10.373
			13.446	9.616
			15.294	9.328
			13.113	9.751
			12.475	9.565
			13.831	10.017
			14.706	9.395
			15.554	10.486
			16.356	9.514
			16.508	9.09
			13.893	9.186
			13.463	9.729
			16.672	9.921
			14.475	9.983
			15.588	8.588
			12.407	9.791
			14.011	9.672
			12.011	9.203
			13.655	9.028
			14.39	10.237
			13.633	11.407
			17.26	9.102
			14.277	10.028
			15.638	9.463
			14.915	9.514
			14.853	10.503
			13.842	9.842
			16.356	8.864
			14.073	10.181
			16.322	9.288
			15.124	9.395
			15.288	11.04
			15.288	10.215
			16.209	10.593
			15.734	9.768
			15.011	10.757
			15.294	10.797
			13.672	9.299
			13.446	8.944
			12.921	10.508
			12.034	9.667
			11.853	10.045
			15.113	10.237
			15.78	11.621
			12.537	8.836
			16.339	9.192
			13.497	8.96
			16.209	9.09
			13.367	9.508
			14.774	10.571
			13.627	10.418
			14.164	9.525
			16.401	10.322
			13.554	7.847
			8.842	8.955
			13.153	8.887
			13.266	9.147
			12.446	8.085
			16.921	8.78
			13.475	10.525
			13.972	10.345
			14.638	9.203
			16.102	9.718
			14.299	9.458
			13.339	9.655
			15.48	9.582
			13.785	10.215
			14.91	10.328
			13.847	9.209
			15.689	10.198
			14.429	9.751
			14.989	9.836
			17.785	11.22
			14.661	9.672
			16.096	9.876
			16.932	10
			17.814	10.661
			15.226	9.362
			15.294	9.847
			16.311	9.412
			14.48	9.667
			15.062	9.079
			14.056	9.209
			15.407	8.977
			13.045	8.955
			13.13	8.87
			16.373	10.859
			14.458	9.395
			13.667	9.175
			12.576	8.124
			13.87	8.554
			12.729	8.955
			12.836	8.819
			13.006	8.734
			13.723	9.299
			12.452	8.774
			13.96	7.944
			14.379	8.723
			11.966	8.977
			11.893	8.282
			12.746	8.328
			12.559	8.819
			14.706	8.424
			15.051	8.412
			13.989	8.186
			13.497	8.966
			15.401	9.136
			14.475	9.011
			16.153	8.989
			13.096	9.056
			14.13	10.695
			15.921	9
			17.254	9.26
			12.531	10.384
			14.836	8.831
			13.305	8.548
			15.52	9.079
			16.034	9.446
			15.26	8.723
			17.333	10.316
			17.277	9.22
			13.678	8.424
			14.706	9.316
			15.316	8.791
			14.486	9.424
			14.695	8.395
			15.661	10.226
			12.977	9.136
			17.825	10.452
			13.746	9.503
			13.718	9.983
			16.785	9.379
			12.198	8.949
			16.887	9.655
			13.667	8.689
			14.989	9.475
			13.977	8.667
			13.051	9.695
			15.791	9.452
			15.107	8.588
			12.864	9.379
			16.74	8.616
			14.768	9.927
			14.028	8.435
			14.548	9.621
			15.904	11.531
			12.61	9.113
			15.107	9.441
			14.39	10.028
			15.277	8.881
			13.819	9.102
			16.113	8.966
			11.147	8.198
			14.22	10.232
			15.13	9.379
			14.079	8.768
			14.605	8.746
			13.277	7.893
			13.977	8.78
			12.994	8.927
			14.672	8.876
			17.621	9.605
			14.802	8.09
			12.757	8.944
			15.175	9.073
			13.48	8.412
			14.141	8.921
			12.644	8.215
			11.78	9.435
			12.695	9.853
			13.469	8.39
			13.147	9.548
			15.842	9.446
			11.311	8.113
			11.508	9.853
			12.311	8.955
			13.226	8.785
			15.893	9.763
			14.169	7.576
			15.35	9.266
			13.672	9.831
			12.768	9.412
			14.362	9.136
			12.938	9.571
			10.102	7.514
			13.859	6.237
			15.124	9.299
			15.684	8.373
			13.853	8.994
			13.955	9.774
			15.548	8.401
			14.017	8.599
			16.605	11.458
			14.401	9.147
			12.068	9.124
			14.237	8.864
			12.571	9.226
			15.158	9.226
			15.751	11.113
			15.938	9.356
			17.277	9.65
			14.734	8.994
			14.294	8.034
			13.362	9.983
			15.966	10.056
			14.983	8.763
			15.203	8.763
			16.881	9.977
			12.559	8.401
			14.452	9.492
			16.588	9.65
			12.814	10.379
			13.463	9.435
			14.847	9.367
			15.316	7.927
			15.243	10.119
			17.226	10.079
			15.898	9.277
			17.819	9.407
			17.412	9
			16.277	8.514
			13.701	9.339
			14.751	8.514
			11.599	8.74
			15.226	8.407
			14.576	9.051
			12.684	9.271
			15.571	9.045
			16.119	9.226
			13.701	9.723
			16.192	10.333
			17.062	9.006
			14.203	10.215
			17.571	8.797
			14.056	10.977
			16.955	9.718
			19.164	9.91
			18.277	9.282
			15.492	10.322
			17.011	10.621
			18.102	11.48
			14.124	10.729
			15.435	10.633
			16.994	10.141
			17.356	10.463
			16.966	11.418
			16.073	10.158
			17.746	10.621
			18.186	10.734
			13.237	9.531
			19.983	11.898
			16.87	9.825
			15.881	10.35
			17.04	10.667
			18.616	9.955
			17.571	9.367
			15.972	10.367
			16.492	9.859
			18.814	11.983
			14.706	11.107
			16.141	10.271
			14.893	10.429
			18.808	10.39
			16.542	10.384
			17.972	10.52
			14.096	10.136
			14.723	9.497
			13.797	9.819
			14.712	10.689
			15.989	10.486
			15.949	10.322
			16.785	9.977
			15.379	9.198
			20.096	11.051
			15.48	10.107
			13.226	11.435
			18.356	11.294
			16.689	10.469
			14.927	11.706
			20.271	11.508
			19.023	10.203
			18.051	10.486
			16.87	10.921
			19.627	10.814
			17.339	10.932
			19.791	11.859
			16.898	10.949
			19.011	10.305
			15.876	11.898
			14.181	12.237
			17.39	9.627
			17.514	9.401
			16.949	10.701
			15.237	9.107
			13.079	10.136
			16.616	12.548
			18.271	11.605
			15.407	11.305
			16.576	11.328
			17.497	10.689
			19.124	11.763
			16.893	9.904
			17.853	10.972
			16.718	10.203
			15.695	11.215
			17.469	10.96
			17.458	11.119
			15.791	9.723
			17.582	10.102
			16.254	11.209
			15.876	11.209
			19.972	12.028
			16.949	10.322
			15.638	10.751
			15.989	10.944
			18.729	10.362
			17.78	10.893
			19.921	9.938
			16.689	11.384
			16.22	11.554
			16.384	11.582
			16.068	10.819
			15.898	11.627
			17.701	11.153
			20.537	12.706
			16.107	11.599
			16.418	11.842
			15.48	11.237
			16.407	11.35
			17.147	10.746
			18.667	12.412
			16.345	10.932
			16.571	11.774
			17.198	11.266
			17.492	12.153
			18.859	11.209
			19.599	10.203
			20.966	12.13
			16.797	11.847
			16.446	10.209
			20.113	11.859
			18.87	11.492
			19.48	12.028
			18.147	10.989
			19.718	11.294
			19.672	10.514
			19.576	11.757
			15.243	10.65
			17.367	12.034
			21.328	12.429
			18.362	11.35
			16.294	12.028
			18.503	11.209
			16.424	10.876
			17.887	10.209
			20.04	10.768
			19.729	11.621
			17.684	10.565
			17.684	10.271
			17.825	11.525
			18	10.401
			17.486	11.226
			15.633	11.367
			15.056	9.797
			17.768	10.412
			18.153	9.723
			15.548	10.429
			18.525	11.514
			15.39	9.921
			17.424	9.605
			19.068	10.684
			17.266	11.023
			16.294	9.542
			15.537	10.271
			15.576	9.921
			14.977	10.124
			17.774	10.277
			17.638	10.746
			16.627	9.164
			15.548	9.136
			16.774	8.311
			13.938	8.452
			16.277	9.74
			15.107	8.927
			17.582	10.181
			18.497	10.514
			19.48	8.35
			13.102	8.435
			19.085	8.904
			17.226	8.701
			15.497	9.243
			14.441	9.311
			14.893	9.588
			13.537	8.887
			18.288	10.356
			13.175	8.87
			16.802	9.831
			15	6.972
			16.294	8.266
			15.096	9.328
			16.277	9.684
			16.497	8.565
			11.847	9.062
			11.96	7.915
			13.514	8.062
			18.853	9.209
			12.944	9.599
			15.915	8.655
			16.768	10.328
			15.282	9.209
			16.633	9.689
			15.949	10.226
			17.723	9.819
			13.881	8.684
			12.446	7.412
			14.65	10.079
			17.102	10.085
			18.446	9.48
			16.107	9.644
			13.424	8.763
			18.158	9.52
			12.39	9.599
			18.164	9.418
			15.723	10.395
			15.435	10.181
			17.26	9.113
			14.328	9.469
			14.356	9.186
			13.186	9.401
			16.785	9.972
			17.04	10.277
			14.418	10.028
			14.593	9.136
			15.463	9.175
			15.136	9.599
			16.435	10.418
			15.689	9.667
			16	9.243
			18.401	9.842
			16.932	8.073
			15.175	9.785
			19.446	9.723
			20.435	10.164
			16.119	9.949
			15.672	10.028
			17.441	9.785
			17.062	9.994
			16.718	9.638
			14.164	10.339
			17.831	10.712
			15.169	9.977
			15.04	9.729
			16.842	9.78
			15.672	10.35
			15.616	10.294
			16.277	8.706
			15.26	8.446
			15.859	10.203
			15.169	10.486
			17.881	10.243
			17.921	10.446
			18.469	9.548
			17.153	9.316
			16.994	9.09
			16.91	9.65
			14.52	9.011
			15.107	9.09
			14.537	9.847
			14.774	10.237
			15.746	9.486
			16.35	9.689
			13.181	8.989
			15.034	9.271
			14.192	9.198
			16.062	9.565
			12.847	9.254
			17.418	9.853
			14.102	10.932
			15.249	9.831
			16.983	8.819
			13.638	8.718
			15.045	10.282
			16.249	8.695
			17.153	9.616
			15.706	9.605
			14.305	9.028
			14.661	10.124
			14.48	9.068
			12.819	9.017
			16.576	10.322
			18.497	8.695
			20.35	9.158
			17.136	10.034
			14.831	8.311
			14.203	9.452
			15.328	9.927
			17.164	9.079
			18.068	9.04
			15.243	9.774
			15.746	9.119
			15.412	9.667
			14.757	8.91
			11.644	8.802
			17.079	9.017
			15.282	9.633
			15.266	9.395
			17.955	9.893

## Sheet: Figure 7A.
			Normalizaed intensity
			eater-dsRed	dome-MESO-GFP
			0.230934	0.796724
			0.110534	0.657546
			0.045319	0.722038
			0.091426	0.621699
			0.102937	0.745618
			0.114809	0.715888
			0.127076	0.768113
			0.080804	0.751932
			0.087513	0.772191
			0.120959	0.738383
			0.174828	0.765876
			0.090473	0.81103
			0.135824	0.761601
			0.094024	0.742461
			0.145098	0.842043
			0.088072	0.799882
			0.120203	0.794488
			0.11129	0.905055
			0.185977	0.859703
			0.154767	0.954451
			0.11425	0.958003
			0.134706	0.859144
			0.160522	0.952807
			0.152925	0.920282
			0.103101	0.899267
			0.119644	1
			0.142697	0.929194
			0.10126	0.930509
			0.212352	0.97323
			0.097182	0.908376
			0.110928	0.840925
			0.119841	0.852633
			0.107771	0.79952
			0.111849	0.670931
			0.10833	0.769954
			0.11892	0.743941
			0.136942	0.687835
			0.138619	0.755089
			0.147334	0.81866
			0.086954	0.77515
			0.079718	0.799125
			0.114645	0.824415
			0.08771	0.813267
			0.056862	0.738383
			0.057026	0.774065
			0.13099	0.797645
			0.112967	0.817147
			0.089354	0.776104
			0.11129	0.68971
			0.095504	0.715164
			0.111652	0.745815
			0.119282	0.840004
			0.1425	0.784096
			0.16779	0.769954
			0.086954	0.722399
			0.112967	0.698984
			0.141777	0.766074
			0.112606	0.790213
			0.117407	0.814188
			0.084356	0.764002
			0.094386	0.78278
			0.085079	0.753412
			0.122077	0.814385
			0.129312	0.760845
			0.078962	0.812872
			0.143059	0.762357
			0.095669	0.704936
			0.10981	0.681159
			0.066892	0.704936
			0.076923	0.633769
			0.075246	0.698622
			0.113526	0.696188
			0.048476	0.721281
			0.116881	0.700299
			0.133949	0.692472
			0.095866	0.564475
			0.141217	0.656822
			0.107377	0.626698
			0.098859	0.636169
			0.09363	0.584898
			0.090473	0.693031
			0.06242	0.643437
			0.083237	0.658664
			0.077482	0.681718
			0.138619	0.626139
			0.108889	0.564081
			0.161081	0.580261
			0.118164	0.610353
			0.058901	0.632289
			0.075608	0.700102
			0.098859	0.715526
			0.168711	0.798961
			0.075608	0.731509
			0.177821	0.787812
			0.094748	0.675963
			0.164074	0.745059
			0.10833	0.713092
			0.099221	0.644556
			0.136186	0.607952
			0.083994	0.635084
			0.107212	0.581544
			0.073207	0.51988
			0.133949	0.607755
			0.090473	0.624659
			0.09363	0.663301
			0.082119	0.648272
			0.135068	0.662742
			0.109448	0.674088
			0.09978	0.699346
			0.121518	0.712007
			0.087315	0.63413
			0.098464	0.599401
			0.143421	0.625974
			0.114086	0.616667
			0.125399	0.617424
			0.104779	0.653468
			0.085276	0.592331
			0.06857	0.593811
			0.112211	0.606472
			0.11892	0.647713
			0.086954	0.681882
			0.091426	0.659026
			0.119841	0.63413
			0.113329	0.701417
			0.070773	0.701779
			0.110534	0.65383
			0.109613	0.681159
			0.087315	0.609629
			0.132831	0.728155
			0.073371	0.751011
			0.098661	0.684481
			0.117604	0.70122
			0.090308	0.675404
			0.075246	0.583977
			0.096984	0.529911
			0.058704	0.515967
			0.091426	0.573585
			0.123754	0.539382
			0.08156	0.479725
			0.095866	0.4619
			0.037327	0.465978
			0.072648	0.464334
			0.036965	0.45187
			0.076561	0.521919
			0.044759	0.500378
			0.058901	0.470813
			0.038083	0.523202
			0.044036	0.444634
			0.078765	0.418423
			0.066136	0.549216
			0.046634	0.479002
			0.046437	0.507975
			0.083796	0.523761
			0.088434	0.575986
			0.056106	0.617062
			0.081198	0.642319
			0.043477	0.508896
			0.071332	0.527477
			0.057585	0.466537
			0.076726	0.537902
			0.052948	0.540698
			0.091032	0.536225
			0.039399	0.539382
			0.0639	0.576545
			0.080278	0.518203
			0.132272	0.495906
			0.067452	0.51225
			0.053869	0.642681
			0.084915	0.528234
			0.112211	0.573585
			0.073569	0.56168
			0.089354	0.652909
			0.102937	0.657382
			0.072286	0.649949
			0.077647	0.649949
			0.104417	0.549972
			0.075608	0.618904
			0.115006	0.599961
			0.102575	0.650673
			0.090473	0.663301
			0.091426	0.58378
			0.069129	0.628375
			0.112211	0.601802
			0.04887	0.558884
			0.057421	0.502779
			0.056106	0.610188
			0.051468	0.535666
			0.025455	0.511132
			0.049429	0.563357
			0.042918	0.622422
			0.095669	0.757885
			0.08919	0.747854
			0.107377	0.717565
			0.039004	0.74154
			0.082876	0.681159
			0.052948	0.760845
			0.063341	0.698984
			0.044595	0.730029
			0.106258	0.709771
			0.100503	0.774624
			0.072089	0.737264
			0.071891	0.754728
			0.102378	0.650113
			0.097741	0.617983
			0.086592	0.635446
			0.035847	0.658664
			0.089749	0.712928
			0.076923	0.639524
			0.058145	0.672049
			0.055546	0.688197
			0.076923	0.682442
			0.079883	0.670372
			0.076561	0.676489
			0.06857	0.698786
			0.068931	0.681521
			0.030454	0.596244
			0.068175	0.663499
			0.07393	0.716085
			0.059624	0.655145
			0.094945	0.754925
			0.095504	0.783142
			0.074128	0.737626
			0.064097	0.754366
			0.138225	0.748972
			0.096063	0.720722
			0.08919	0.717762
			0.048476	0.638406
			0.045319	0.529154
			0.104976	0.565758
			0.021377	0.604959
			0.058539	0.578946
			0.067057	0.567435
			0.065413	0.507613
			0.03417	0.503338
			0.081922	0.604959
			0.125399	0.632453
			0.06857	0.572829
			0.050548	0.687276
			0.115204	0.638406
			0.077647	0.712369
			0.086395	0.668892
			0.09067	0.663696
			0.105732	0.625218
			0.060184	0.617226
			0.040879	0.590094
			0.062782	0.622061
			0.111652	0.607393
			0.089749	0.733746
			0.086033	0.671128
			0.060184	0.6806
			0.098661	0.626533
			0.07245	0.646397
			0.064656	0.667774
			0.086756	0.661821
			0.068175	0.693788
			0.077285	0.642122
			0.056106	0.622422
			0.099385	0.657184
			0.085276	0.694347
			0.062617	0.723518
			0.067254	0.65531
			0.055546	0.620383
			0.068175	0.570395
			0.091591	0.621502
			0.051107	0.648074
			0.071332	0.506857
			0.031013	0.472852
			0.044398	0.493307
			0.048476	0.395929
			0.043839	0.407472
			0.063538	0.477324
			0.070214	0.473608
			0.019864	0.435886
			0.073766	0.485678
			0.043115	0.497583
			0.074489	0.464137
			0.036603	0.409511
			0.069293	0.513566
			0.067452	0.44891
			0.061861	0.477324
			0.050548	0.625218
			0.086756	0.570231
			0.056467	0.593646
			0.086033	0.610353
			0.111487	0.594567
			0.062255	0.671128
			0.066892	0.683757
			0.050712	0.588812
			0.042918	0.659223
			0.063341	0.543855
			0.054987	0.547933
			0.100141	0.601079
			0.080278	0.565593
			0.082317	0.657546
			0.092512	0.656066
			0.061302	0.596244
			0.081198	0.593252
			0.133949	0.658664
			0.062782	0.647877
			0.049232	0.667971
			0.044957	0.636564
			0.038642	0.547933
			0.07301	0.534351
			0.064656	0.507811
			0.060019	0.484
			0.015589	0.433486
			0.088434	0.37271
			0.045878	0.412109
			0.056862	0.459105
			0.050548	0.498504
			0.0983	0.489394
			0.102378	0.558325
			0.086756	0.612392
			0.092512	0.535107
			0.050153	0.514849
			0.039399	0.596244
			0.088993	0.559082
			0.039004	0.63117
			0.069491	0.66534
			0.087315	0.616108
			0.078403	0.588253
			0.0639	0.597922
			0.08452	0.59437
			0.092512	0.567073
			0.088795	0.530832
			0.06242	0.568751
			0.062782	0.558161
			0.125037	0.530634
			0.062058	0.534351
			0.098102	0.590292
			0.082876	0.539021
			0.057421	0.634328
			0.085276	0.616865
			0.090867	0.550728
			0.075049	0.599401
			0.046831	0.490709
			0.068734	0.466537
			0.034729	0.439603
			0.041997	0.426415
			0.079718	0.39856
			0.057585	0.390009
			0.032525	0.382741
			0.074489	0.335942
			0.049429	0.300983
			0.067616	0.302858
			0.054626	0.345217
			0.093268	0.335186
			0.034926	0.379584
			0.069688	0.40096
			0.05798	0.407275
			0.099582	0.489229
			0.071332	0.394284
			0.036406	0.401158
			0.040879	0.410432
			0.065215	0.414904
			0.080442	0.421021
			0.080278	0.429934
			0.061302	0.374387
			0.075246	0.398362
			0.043115	0.372348
			0.049791	0.35505
			0.058342	0.319203
			0.006676	0.415628
			0.046831	0.346696
			0.07393	0.345414
			0.049429	0.287072
			0.049035	0.24935
			0.034729	0.25231
			0.034729	0.241523
			0.024337	0.245437
			0.061499	0.24376
			0.02973	0.253231
			0.061499	0.271089
			0.03269	0.242641
			0.019502	0.245799
			0.04272	0.224817
			0.020061	0.2211
			0.037327	0.254908
			0.049988	0.258263
			0.040681	0.257145
			0.051633	0.186898
			0.036603	0.21255
			0.014306	0.235965
			0.025816	0.259019
			0.059263	0.253231
			0.017266	0.251751
			0.062058	0.256947
			0.022462	0.222416
			0.025093	0.204755
			0.024534	0.197882
			0.007071	0.207551
			0.02062	0.223896
			0.044398	0.257342
			0.029894	0.193048
			0.05183	0.24843
			0.030454	0.217187
			0.016542	0.232052
			0.028809	0.196764
			0.020258	0.203637
			0.039201	0.19752
			0.052587	0.193968
			0.035847	0.229651
			0.015029	0.21107
			0.024896	0.261782
			0.022857	0.240997
			0.011149	0.225935
			0.032328	0.185253
			0.018746	0.229848
			0.030454	0.186898
			0.034564	0.193245
			0.007597	0.212747
			0.042556	0.179663
			0.008912	0.220739
			0.059263	0.197126
			0.048114	0.210708
			0.032887	0.20344
			0.03417	0.146414
			0.026935	0.178742
			0.032887	0.155688
			0.027494	0.174105
			0.018384	0.219423
			0.05946	0.18134
			0.046996	0.192686
			0.000921	0.228533
			0	0.221462
			0.019864	0.206038
			0.017101	0.214589
			0.035847	0.167396
			0.026737	0.234485
			0.020982	0.243201
			0.026014	0.249153
			0.033446	0.245437
			0.033084	0.179301
			0.049791	0.265695
			0.012629	0.254908
			0.092906	0.250074
			0.039958	0.271812
			0.049594	0.266814
			0.018943	0.224258
			0.021541	0.221857
			0.061302	0.199362
			0.063341	0.252146
			0.042918	0.292827
			0.04032	0.24228
			0.053146	0.265136
			0.053869	0.277765
			0.040122	0.247871
			0.041438	0.263821
			0.030651	0.247673
			0.042556	0.184135
			0.078403	0.197323
			0.078206	0.148255
			0.039201	0.208636
			0.055908	0.189331
			0.05183	0.174466
			0.03884	0.192291
			0.049035	0.184135
			0.080442	0.202157
			0.070609	0.186898
			0.052192	0.183182
			0.04739	0.178544
			0.052192	0.220541
			0.061137	0.154964
			0.058704	0.168876
			0.075608	0.180583
			0.046996	0.20811
			0.066498	0.201237
			0.054066	0.222219
			0.067057	0.167034
			0.042556	0.191929
			0.045319	0.159042
			0.056106	0.168349
			0.069293	0.16072
			0.088072	0.194528
			0.054987	0.209031
			0.092512	0.141382
			0.074687	0.144539
			0.056665	0.14102
			0.065413	0.129674
			0.01766	0.144934
			0.038083	0.143059
			0.033249	0.196402
			0.036044	0.148255
			0.052192	0.166113
			0.059624	0.191568
			0.045154	0.236524
			0.070609	0.289473
			0.059263	0.285559
			0.147334	0.284079
			0.052751	0.273128
			0.047193	0.253067
			0.050153	0.263821
			0.075246	0.211826
			0.021936	0.206794
			0.080442	0.259184
			0.063735	0.239682
			0.074325	0.209952
			0.094386	0.201039
			0.04272	0.228171
			0.059263	0.173546
			0.084158	0.14865
			0.083599	0.181143
			0.100898	0.172789
			0.143618	0.1204
			0.082876	0.17371
			0.16779	0.185056
			0.113526	0.182261
			0.086395	0.195087
			0.097741	0.234485
			0.10833	0.21403
			0.137501	0.219061
			0.124675	0.207715
			0.136745	0.213109
			0.213865	0.216266
			0.205676	0.213865
			0.138619	0.238563
			0.149933	0.223896
			0.146052	0.211432
			0.1425	0.194889
			0.197323	0.213109
			0.159404	0.209754
			0.190252	0.203637
			0.162956	0.159963
			0.200677	0.150853
			0.139902	0.150294
			0.220344	0.170947
			0.166672	0.214227
			0.162397	0.224455
			0.222975	0.225737
			0.155688	0.202157
			0.183576	0.207715
			0.106094	0.248035
			0.165554	0.217384
			0.183182	0.181702
			0.132272	0.190252
			0.163877	0.16779
			0.089914	0.208833
			0.195843	0.188411
			0.082678	0.225737
			0.112211	0.171309
			0.124116	0.202716
			0.144934	0.19045
			0.124478	0.185812
			0.086395	0.265893
			0.159404	0.223896
			0.177985	0.239123
			0.24376	0.197126
			0.174269	0.270332
			0.179301	0.235406
			0.176505	0.236886
			0.172592	0.253988
			0.172789	0.285559
			0.148255	0.27349
			0.137501	0.294307
			0.134509	0.333311
			0.134903	0.243201
			0.19433	0.256388
			0.234847	0.195448
			0.227776	0.251751
			0.197323	0.231328
			0.25231	0.251587
			0.206038	0.237084
			0.192686	0.22018
			0.322919	0.231887
			0.196402	0.255665
			0.198047	0.285033
			0.234847	0.24228
			0.198441	0.24228
			0.216825	0.257901
			0.313448	0.25379
			0.197126	0.226132
			0.316966	0.230407
			0.209754	0.234847
			0.259381	0.263295
			0.184135	0.250633
			0.201237	0.227612
			0.232052	0.294669
			0.17371	0.236886
			0.25083	0.285197
			0.205117	0.214227
			0.233729	0.228171
			0.219259	0.26905
			0.172592	0.269214
			0.196567	0.272766
			0.207354	0.282961
			0.183017	0.302299
			0.270332	0.25379
			0.251587	0.267373
			0.237281	0.25379
			0.231493	0.238202
			0.211826	0.247673
			0.261223	0.244878
			0.203835	0.241162
			0.208472	0.230407
			0.31792	0.258066
			0.302101	0.242839
			0.301378	0.264939
			0.245437	0.290229
			0.239123	0.221857
			0.238563	0.255303
			0.202716	0.251192
			0.224258	0.226494
			0.285395	0.249515
			0.25083	0.264939
			0.299701	0.258263
			0.229651	0.18989
			0.192291	0.19752
			0.256947	0.195843
			0.188575	0.185253
			0.254744	0.213471
			0.265498	0.184694
			0.316046	0.193048
			0.273128	0.224455
			0.283718	0.226856
			0.354326	0.215904
			0.323116	0.192291
			0.327753	0.219259
			0.288552	0.227612
			0.245437	0.196205
			0.321636	0.240602
			0.294866	0.254744
			0.332391	0.228895
			0.352846	0.196402
			0.280363	0.223896
			0.287072	0.224817
			0.351169	0.244713
			0.248791	0.239123
			0.238366	0.201598
			0.321439	0.259578
			0.383135	0.204558
			0.297267	0.252869
			0.367876	0.220903
			0.36883	0.263295
			0.390371	0.244713
			0.349492	0.251587
			0.371789	0.23169
			0.28819	0.180978
			0.383135	0.230407
			0.313645	0.239682
			0.439603	0.22873
			0.290591	0.194889
			0.326076	0.21255
			0.29115	0.241359
			0.40244	0.216825
			0.410234	0.247311
			0.431249	0.212352
			0.356924	0.222021
			0.307692	0.251389
			0.369191	0.256947
			0.356365	0.241359
			0.347091	0.252869
			0.388332	0.273325
			0.321242	0.259381
			0.41918	0.225376
			0.264018	0.232249
			0.354524	0.224619
			0.306212	0.235768
			0.316802	0.199
			0.352287	0.245437
			0.299898	0.229848
			0.319762	0.246917
			0.306015	0.253231
			0.36416	0.287072
			0.436084	0.247871
			0.401717	0.29115
			0.428454	0.259578
			0.390732	0.217943
			0.39093	0.308613
			0.357483	0.280199
			0.367876	0.286513
			0.446114	0.270694
			0.357483	0.270168
			0.345776	0.275364
			0.405236	0.325353
			0.438682	0.291709
			0.484198	0.278883
			0.357286	0.311573
			0.462262	0.289275
			0.353405	0.269214
			0.410234	0.259184
			0.398362	0.314007
			0.415069	0.289111
			0.475844	0.27964
			0.404117	0.293551
			0.383135	0.287434
			0.42773	0.302299
			0.456507	0.281843
			0.484395	0.317723
			0.510771	0.285757
			0.515769	0.271812
			0.429769	0.27497
			0.415628	0.292827
			0.521163	0.299142
			0.44891	0.301181
			0.485513	0.255303
			0.380899	0.294866
			0.43365	0.290953
			0.367876	0.275529
			0.421942	0.269773
			0.446114	0.309534
			0.421219	0.348012
			0.540501	0.272207
			0.442398	0.302661
			0.487158	0.284079
			0.46338	0.285757
			0.461341	0.318282
			0.428092	0.296544
			0.510771	0.26438
			0.435689	0.307692
			0.509652	0.278324
			0.470254	0.281843
			0.475647	0.335942
			0.475647	0.30881
			0.505936	0.321242
			0.490315	0.29411
			0.466537	0.326635
			0.475844	0.327951
			0.422501	0.278686
			0.415069	0.267011
			0.397803	0.318446
			0.368632	0.290788
			0.36268	0.30322
			0.469892	0.309534
			0.491828	0.35505
			0.385174	0.263459
			0.510211	0.275167
			0.416746	0.267537
			0.505936	0.271812
			0.412471	0.285559
			0.458743	0.320518
			0.421021	0.315487
			0.438682	0.286118
			0.51225	0.312329
			0.418621	0.230934
			0.263656	0.267373
			0.405433	0.265136
			0.409149	0.273687
			0.382182	0.238761
			0.529352	0.261617
			0.416023	0.319005
			0.432368	0.313086
			0.45427	0.275529
			0.502417	0.292466
			0.443122	0.283915
			0.41155	0.290394
			0.481961	0.287993
			0.426218	0.30881
			0.463216	0.312527
			0.428257	0.275726
			0.488835	0.308251
			0.447397	0.293551
			0.465814	0.296346
			0.557766	0.341862
			0.455027	0.290953
			0.50222	0.297662
			0.529714	0.30174
			0.55872	0.323478
			0.473608	0.280758
			0.475844	0.296708
			0.509291	0.282402
			0.449074	0.290788
			0.468215	0.271451
			0.43513	0.275726
			0.479561	0.268096
			0.401881	0.267373
			0.404677	0.264577
			0.51133	0.32999
			0.448351	0.281843
			0.422337	0.274608
			0.386457	0.240043
			0.429013	0.254185
			0.391489	0.267373
			0.395008	0.2629
			0.400599	0.260105
			0.424179	0.278686
			0.382379	0.26142
			0.431973	0.234124
			0.445753	0.259743
			0.366396	0.268096
			0.363995	0.24524
			0.392048	0.246752
			0.385898	0.2629
			0.456507	0.24991
			0.467853	0.249515
			0.432927	0.242082
			0.416746	0.267734
			0.479363	0.273325
			0.44891	0.269214
			0.504094	0.268491
			0.403558	0.270694
			0.437564	0.324596
			0.496465	0.268853
			0.540303	0.277403
			0.384977	0.314368
			0.460782	0.263295
			0.410432	0.253988
			0.483277	0.271451
			0.500181	0.28352
			0.474726	0.259743
			0.542901	0.312132
			0.54106	0.276088
			0.422699	0.24991
			0.456507	0.279245
			0.476568	0.261979
			0.449272	0.282797
			0.456145	0.248956
			0.487914	0.309172
			0.399645	0.273325
			0.559082	0.316605
			0.424935	0.285395
			0.424014	0.301181
			0.524879	0.281317
			0.374026	0.267175
			0.528234	0.290394
			0.422337	0.258625
			0.465814	0.284474
			0.432532	0.257901
			0.402078	0.291709
			0.492189	0.283718
			0.469694	0.255303
			0.395929	0.281317
			0.523399	0.256224
			0.458546	0.299339
			0.434209	0.250271
			0.451311	0.289275
			0.495906	0.35209
			0.387575	0.272569
			0.469694	0.283356
			0.446114	0.302661
			0.475285	0.264939
			0.427336	0.272207
			0.502779	0.267734
			0.339461	0.242477
			0.440524	0.30937
			0.470451	0.281317
			0.435886	0.261223
			0.453185	0.260499
			0.409511	0.232446
			0.432532	0.261617
			0.400204	0.266452
			0.455389	0.264775
			0.552373	0.288749
			0.459664	0.238925
			0.39241	0.267011
			0.471931	0.271253
			0.416187	0.249515
			0.437925	0.266254
			0.388693	0.243036
			0.360279	0.283158
			0.390371	0.296905
			0.415825	0.248791
			0.405236	0.286875
			0.493867	0.28352
			0.344855	0.239682
			0.351334	0.296905
			0.377742	0.267373
			0.407834	0.261782
			0.495544	0.293945
			0.438846	0.222021
			0.477686	0.277601
			0.422501	0.296182
			0.392771	0.282402
			0.445194	0.273325
			0.398362	0.287631
			0.305094	0.219982
			0.428651	0.177985
			0.470254	0.278686
			0.48867	0.248232
			0.428454	0.268655
			0.431808	0.294307
			0.484198	0.249153
			0.433847	0.255665
			0.518959	0.349689
			0.446476	0.273687
			0.36975	0.272931
			0.441083	0.26438
			0.386293	0.276285
			0.471372	0.276285
			0.490874	0.338343
			0.497024	0.28056
			0.54106	0.290229
			0.457428	0.268655
			0.442957	0.237084
			0.412306	0.301181
			0.497945	0.303581
			0.465616	0.261058
			0.472852	0.261058
			0.528036	0.300983
			0.385898	0.249153
			0.448153	0.285033
			0.5184	0.290229
			0.394284	0.314204
			0.415628	0.283158
			0.461144	0.280922
			0.476568	0.233565
			0.474167	0.305653
			0.539382	0.304338
			0.495708	0.277962
			0.558884	0.282238
			0.545499	0.268853
			0.508172	0.252869
			0.423455	0.280001
			0.457987	0.252869
			0.354326	0.260302
			0.473608	0.24935
			0.452231	0.27053
			0.390009	0.277765
			0.484954	0.270332
			0.502976	0.276285
			0.423455	0.29263
			0.505377	0.312691
			0.533989	0.26905
			0.439964	0.30881
			0.550728	0.262176
			0.43513	0.33387
			0.53047	0.292466
			0.603118	0.29878
			0.573947	0.278127
			0.482356	0.312329
			0.532312	0.322163
			0.568192	0.350413
			0.437366	0.325714
			0.480481	0.322557
			0.531753	0.306377
			0.543658	0.316966
			0.530832	0.348374
			0.501463	0.306936
			0.556484	0.322163
			0.570954	0.325879
			0.408195	0.286316
			0.630052	0.36416
			0.527675	0.295984
			0.495149	0.31325
			0.533265	0.323675
			0.585096	0.30026
			0.550728	0.280922
			0.498142	0.313809
			0.515243	0.297103
			0.591607	0.366955
			0.456507	0.338146
			0.5037	0.310652
			0.462657	0.315848
			0.59141	0.314566
			0.516888	0.314368
			0.563916	0.318841
			0.436446	0.306212
			0.457066	0.285197
			0.426612	0.295787
			0.456704	0.324399
			0.498701	0.317723
			0.497385	0.312329
			0.524879	0.300983
			0.47864	0.275364
			0.633769	0.336304
			0.481961	0.305259
			0.407834	0.348933
			0.576545	0.344296
			0.521722	0.317164
			0.463775	0.357845
			0.639524	0.351334
			0.598481	0.308416
			0.566514	0.317723
			0.527675	0.332029
			0.618344	0.32851
			0.543099	0.332391
			0.623738	0.362877
			0.528595	0.33295
			0.598086	0.31177
			0.494985	0.36416
			0.439241	0.375308
			0.544776	0.289473
			0.548854	0.28204
			0.530273	0.324794
			0.47397	0.272371
			0.402999	0.306212
			0.519321	0.385536
			0.573749	0.354524
			0.479561	0.344657
			0.518006	0.345414
			0.548295	0.324399
			0.601802	0.35972
			0.528431	0.298583
			0.560003	0.333706
			0.522676	0.308416
			0.489032	0.341698
			0.547374	0.333311
			0.547012	0.33854
			0.492189	0.29263
			0.55109	0.305094
			0.507416	0.3415
			0.494985	0.3415
			0.629691	0.368435
			0.530273	0.312329
			0.487158	0.326438
			0.498701	0.332785
			0.588812	0.313645
			0.557602	0.331108
			0.628013	0.299701
			0.521722	0.347256
			0.506298	0.352846
			0.511691	0.353767
			0.501299	0.328674
			0.495708	0.355247
			0.555004	0.339659
			0.648272	0.390732
			0.502582	0.354326
			0.51281	0.362318
			0.481961	0.342421
			0.512448	0.346137
			0.536784	0.326274
			0.586773	0.381064
			0.510409	0.332391
			0.517841	0.360082
			0.538462	0.343375
			0.54813	0.372546
			0.593087	0.3415
			0.617424	0.308416
			0.66238	0.371789
			0.525274	0.362482
			0.51373	0.308613
			0.634328	0.362877
			0.593449	0.350807
			0.61351	0.368435
			0.569671	0.334265
			0.621337	0.344296
			0.619824	0.318644
			0.616667	0.359522
			0.474167	0.323116
			0.544019	0.368632
			0.674286	0.381623
			0.576742	0.346137
			0.508732	0.368435
			0.581379	0.3415
			0.513007	0.330549
			0.561121	0.308613
			0.631927	0.326997
			0.621699	0.35505
			0.554445	0.320321
			0.554445	0.310652
			0.559082	0.351893
			0.564837	0.314927
			0.547933	0.342059
			0.486993	0.346696
			0.468017	0.295064
			0.557207	0.315289
			0.569869	0.29263
			0.484198	0.315848
			0.582103	0.351531
			0.479002	0.299142
			0.545894	0.288749
			0.599961	0.324235
			0.540698	0.335383
			0.508732	0.286677
			0.483836	0.310652
			0.485119	0.299142
			0.465419	0.305818
			0.557405	0.310849
			0.552932	0.326274
			0.519683	0.274246
			0.484198	0.273325
			0.524517	0.246193
			0.431249	0.25083
			0.508172	0.293189
			0.469694	0.266452
			0.55109	0.307692
			0.581182	0.318644
			0.61351	0.247476
			0.403756	0.250271
			0.60052	0.265695
			0.539382	0.259019
			0.48252	0.276844
			0.447792	0.27908
			0.462657	0.28819
			0.418062	0.265136
			0.574309	0.313448
			0.406156	0.264577
			0.525438	0.296182
			0.466176	0.202157
			0.508732	0.244713
			0.469333	0.27964
			0.508172	0.291347
			0.515408	0.254547
			0.362482	0.270892
			0.366199	0.23317
			0.417305	0.238004
			0.59289	0.275726
			0.39856	0.288552
			0.496267	0.257506
			0.52432	0.312527
			0.47545	0.275726
			0.51988	0.291512
			0.497385	0.309172
			0.555727	0.295787
			0.429375	0.25846
			0.382182	0.216628
			0.454665	0.304338
			0.535304	0.304535
			0.579505	0.284638
			0.502582	0.290032
			0.414345	0.261058
			0.570033	0.285954
			0.38034	0.288552
			0.570231	0.282599
			0.489953	0.31473
			0.480481	0.307692
			0.540501	0.272569
			0.444075	0.284277
			0.444996	0.27497
			0.406518	0.28204
			0.524879	0.300819
			0.533265	0.310849
			0.447035	0.302661
			0.45279	0.273325
			0.481402	0.274608
			0.470648	0.288552
			0.513369	0.315487
			0.488835	0.290788
			0.499063	0.276844
			0.578025	0.296544
			0.529714	0.238366
			0.471931	0.294669
			0.612392	0.29263
			0.644917	0.307133
			0.502976	0.300062
			0.488276	0.302661
			0.546453	0.294669
			0.533989	0.301542
			0.522676	0.289835
			0.438682	0.312888
			0.559279	0.325155
			0.471733	0.300983
			0.467491	0.292827
			0.526754	0.294505
			0.488276	0.31325
			0.486434	0.311409
			0.508172	0.259184
			0.474726	0.250633
			0.494426	0.308416
			0.471733	0.317723
			0.560923	0.309731
			0.562239	0.316407
			0.580261	0.286875
			0.536982	0.279245
			0.531753	0.271812
			0.52899	0.290229
			0.45039	0.269214
			0.469694	0.271812
			0.450949	0.296708
			0.458743	0.309534
			0.490709	0.284836
			0.510573	0.291512
			0.406354	0.268491
			0.467294	0.277765
			0.439603	0.275364
			0.501102	0.287434
			0.395369	0.277206
			0.545697	0.296905
			0.436643	0.332391
			0.474364	0.296182
			0.531391	0.2629
			0.421383	0.259578
			0.467655	0.311014
			0.507252	0.258822
			0.536982	0.289111
			0.489394	0.288749
			0.443319	0.269773
			0.455027	0.305818
			0.449074	0.271089
			0.394449	0.269412
			0.518006	0.312329
			0.581182	0.258822
			0.642122	0.274049
			0.536423	0.302858
			0.460618	0.246193
			0.439964	0.283718
			0.476963	0.299339
			0.537343	0.271451
			0.567073	0.270168
			0.474167	0.294307
			0.490709	0.272766
			0.479725	0.290788
			0.458184	0.265893
			0.355806	0.262341
			0.534548	0.269412
			0.47545	0.28967
			0.474924	0.281843
			0.563357	0.298221

## Sheet: Figure 7A..
			Ratio
			0.313241
			0.201066
			0.096708
			0.182726
			0.168319
			0.191033
			0.193913
			0.138545
			0.143427
			0.193453
			0.254676
			0.140312
			0.206605
			0.157429
			0.198154
			0.139301
			0.179322
			0.148492
			0.240303
			0.185312
			0.143515
			0.182604
			0.191496
			0.190051
			0.14058
			0.142898
			0.177585
			0.134071
			0.239398
			0.132883
			0.159045
			0.167059
			0.163192
			0.199095
			0.169947
			0.189414
			0.229485
			0.211898
			0.206276
			0.142201
			0.129319
			0.166493
			0.136652
			0.109722
			0.105041
			0.191714
			0.16594
			0.145021
			0.1931
			0.165212
			0.179552
			0.168847
			0.209105
			0.244543
			0.152209
			0.192944
			0.212944
			0.170965
			0.1718
			0.140921
			0.150039
			0.14376
			0.17731
			0.198539
			0.126302
			0.215571
			0.167745
			0.193342
			0.128437
			0.157444
			0.141064
			0.194462
			0.101024
			0.197975
			0.223847
			0.207905
			0.246141
			0.205724
			0.189945
			0.197313
			0.163303
			0.133546
			0.160936
			0.147583
			0.253725
			0.230072
			0.309871
			0.22792
			0.130467
			0.141274
			0.169648
			0.237072
			0.135426
			0.251493
			0.173348
			0.247615
			0.183002
			0.188112
			0.257159
			0.167809
			0.220715
			0.183431
			0.253717
			0.180433
			0.174907
			0.161757
			0.235115
			0.194775
			0.174694
			0.201112
			0.173074
			0.200462
			0.261141
			0.21935
			0.236645
			0.193815
			0.181461
			0.154123
			0.219921
			0.216423
			0.160907
			0.172786
			0.222261
			0.192796
			0.134317
			0.202164
			0.193063
			0.179733
			0.211791
			0.129158
			0.176772
			0.198718
			0.167166
			0.167528
			0.222813
			0.158048
			0.197361
			0.266342
			0.214443
			0.251513
			0.130719
			0.203025
			0.133814
			0.188859
			0.136284
			0.172776
			0.118501
			0.150854
			0.237673
			0.161826
			0.145744
			0.137484
			0.201361
			0.191614
			0.129212
			0.16182
			0.131726
			0.177538
			0.171607
			0.183808
			0.141029
			0.209749
			0.117439
			0.150795
			0.196961
			0.304766
			0.175355
			0.120931
			0.201753
			0.231961
			0.171023
			0.171293
			0.190016
			0.146833
			0.15475
			0.227946
			0.159031
			0.226662
			0.191363
			0.170334
			0.194068
			0.146849
			0.221554
			0.129693
			0.159561
			0.130605
			0.13966
			0.097697
			0.129657
			0.107843
			0.156431
			0.150095
			0.180622
			0.086039
			0.155314
			0.101628
			0.124598
			0.094731
			0.181015
			0.159194
			0.129803
			0.126651
			0.19123
			0.193566
			0.171638
			0.091833
			0.157934
			0.156085
			0.121966
			0.115581
			0.146644
			0.153425
			0.147371
			0.131835
			0.135558
			0.092377
			0.138
			0.135979
			0.127157
			0.156098
			0.151352
			0.132407
			0.116736
			0.21306
			0.164732
			0.156159
			0.113604
			0.130239
			0.22282
			0.076743
			0.141353
			0.158416
			0.173063
			0.115561
			0.172529
			0.231252
			0.159513
			0.108733
			0.213866
			0.141688
			0.163107
			0.170523
			0.20367
			0.135508
			0.110188
			0.138501
			0.218721
			0.153613
			0.162067
			0.123374
			0.192443
			0.147852
			0.132087
			0.165306
			0.132202
			0.15602
			0.128145
			0.184881
			0.155803
			0.119562
			0.138307
			0.127686
			0.159502
			0.183035
			0.115874
			0.184394
			0.116293
			0.137441
			0.178716
			0.163299
			0.179738
			0.194404
			0.101499
			0.196755
			0.133877
			0.206855
			0.145967
			0.178335
			0.198687
			0.176413
			0.119076
			0.190652
			0.134668
			0.177518
			0.222969
			0.128014
			0.132263
			0.126382
			0.10206
			0.158449
			0.1428
			0.202597
			0.181213
			0.159854
			0.175123
			0.141862
			0.174618
			0.234882
			0.133203
			0.10986
			0.108617
			0.114377
			0.178352
			0.171585
			0.170506
			0.092746
			0.289028
			0.166217
			0.172743
			0.147782
			0.242837
			0.221211
			0.178083
			0.212798
			0.142597
			0.106726
			0.198093
			0.100465
			0.139533
			0.177923
			0.171494
			0.145638
			0.179649
			0.20135
			0.207768
			0.150284
			0.153621
			0.272818
			0.158847
			0.202834
			0.194307
			0.127828
			0.174548
			0.2042
			0.163089
			0.14283
			0.194191
			0.132539
			0.152418
			0.251004
			0.203091
			0.145551
			0.279891
			0.233337
			0.287124
			0.219573
			0.332305
			0.152583
			0.226166
			0.195927
			0.245398
			0.233651
			0.148353
			0.15543
			0.208913
			0.240038
			0.234998
			0.220247
			0.240609
			0.175846
			0.201274
			0.246795
			0.076357
			0.197853
			0.271275
			0.243668
			0.275485
			0.221372
			0.230261
			0.188827
			0.327182
			0.202815
			0.297199
			0.221748
			0.170864
			0.277248
			0.190117
			0.228545
			0.270224
			0.238547
			0.368009
			0.265917
			0.1575
			0.185036
			0.308152
			0.159198
			0.313962
			0.198735
			0.225216
			0.229611
			0.14574
			0.190227
			0.251445
			0.258999
			0.28655
			0.235698
			0.168507
			0.249853
			0.205358
			0.295272
			0.360553
			0.245261
			0.176998
			0.18008
			0.186434
			0.151267
			0.279963
			0.178526
			0.269053
			0.279958
			0.144777
			0.336991
			0.145416
			0.385247
			0.316372
			0.260305
			0.353231
			0.26262
			0.328296
			0.27145
			0.184607
			0.415365
			0.337223
			0.109725
			0.109141
			0.201551
			0.182993
			0.323753
			0.205908
			0.177981
			0.192358
			0.222249
			0.2917
			0.262691
			0.140975
			0.433029
			0.224422
			0.26102
			0.183281
			0.195483
			0.390446
			0.323952
			0.218933
			0.250366
			0.274671
			0.265667
			0.244559
			0.235673
			0.210268
			0.329857
			0.470183
			0.6006
			0.28135
			0.383622
			0.39168
			0.300659
			0.360523
			0.469162
			0.456669
			0.37717
			0.362328
			0.320276
			0.484739
			0.437919
			0.494617
			0.315113
			0.409994
			0.32564
			0.485095
			0.31812
			0.389154
			0.425808
			0.513305
			0.519733
			0.347723
			0.709992
			0.593103
			0.498338
			0.590185
			0.260321
			0.383188
			0.270119
			0.36021
			0.410483
			0.396692
			0.274167
			0.308715
			0.276294
			0.560604
			0.266046
			0.265258
			0.265627
			0.428434
			0.209757
			0.375718
			0.340565
			0.427937
			0.532574
			0.273606
			0.430515
			0.633115
			0.53166
			0.640401
			1.15738
			0.547732
			0.91863
			0.671745
			0.510878
			0.47731
			0.561707
			0.668715
			0.646408
			0.682136
			0.990136
			0.966021
			0.62384
			0.705358
			0.725944
			0.764035
			0.934292
			0.78745
			0.941998
			1.016
			1.27993
			0.941427
			1.24938
			0.80297
			0.753333
			0.989075
			0.797332
			0.897213
			0.484164
			0.78803
			1.00709
			0.733283
			0.979922
			0.496028
			1.03448
			0.434257
			0.702188
			0.658034
			0.79081
			0.711969
			0.38743
			0.743089
			0.77038
			1.20795
			0.677059
			0.786296
			0.7713
			0.710459
			0.639356
			0.583415
			0.512175
			0.448449
			0.599392
			0.781116
			1.17701
			0.914033
			0.868431
			1.0026
			0.882499
			0.88883
			1.35145
			0.790441
			0.721344
			0.972412
			0.83728
			0.85589
			1.21236
			0.885469
			1.3361
			0.904218
			0.986525
			0.760597
			0.896463
			0.805416
			0.760713
			0.889965
			0.962256
			1.02177
			0.83189
			0.673954
			0.745915
			0.756178
			0.637916
			1.05889
			0.946399
			0.941232
			0.974715
			0.869555
			1.06009
			0.860873
			0.914826
			1.20987
			1.21951
			1.12476
			0.85886
			1.06934
			0.940731
			0.82583
			0.991183
			1.1297
			0.951695
			1.14519
			1.18321
			0.976724
			1.27404
			1.01564
			1.17154
			1.38146
			1.55863
			1.19346
			1.22388
			1.56955
			1.59622
			1.44034
			1.23922
			1.22044
			1.30267
			1.14234
			1.40424
			1.69987
			1.22494
			1.2471
			1.3916
			1.03631
			1.16075
			1.21576
			1.77076
			1.15856
			1.59255
			1.36338
			1.53581
			1.35127
			1.5413
			1.51517
			1.59303
			1.27721
			1.82417
			1.43105
			1.47365
			1.18545
			1.76085
			1.59365
			1.91403
			1.54145
			1.20215
			1.39512
			1.42834
			1.33651
			1.38277
			1.21591
			1.76752
			1.12248
			1.516
			1.26795
			1.52094
			1.39201
			1.27259
			1.26581
			1.18827
			1.24534
			1.68441
			1.34739
			1.58901
			1.70505
			1.24518
			1.25147
			1.25941
			1.589
			1.2937
			1.23277
			1.22663
			1.46096
			1.67093
			1.13497
			1.54672
			1.2841
			1.52757
			1.24728
			1.3983
			1.63958
			1.34478
			1.30423
			1.38075
			1.5653
			1.48331
			1.71915
			1.81606
			1.51241
			1.3838
			1.68048
			1.44996
			1.81509
			1.26718
			1.44861
			1.30512
			1.51252
			1.40569
			1.19514
			1.89629
			1.42371
			1.65254
			1.56769
			1.41417
			1.40642
			1.84522
			1.38228
			1.75732
			1.60979
			1.38478
			1.49662
			1.53016
			1.61077
			1.39546
			1.4165
			1.47027
			1.50335
			1.22964
			1.24485
			1.17999
			1.47631
			1.35789
			1.41885
			1.77752
			1.50636
			1.78317
			1.40587
			1.3976
			1.30802
			1.48703
			1.58894
			1.72728
			0.987381
			1.48003
			1.45031
			1.53939
			1.92722
			1.28028
			1.3506
			1.59057
			1.65692
			1.51184
			1.38156
			1.61553
			1.34949
			1.44365
			1.50364
			1.53844
			1.47975
			1.52389
			1.58512
			1.51582
			1.62981
			1.6932
			1.67095
			1.62636
			1.55316
			1.733
			1.49788
			1.65899
			1.52633
			1.71627
			1.45673
			1.48027
			1.50778
			1.5389
			1.48959
			1.54801
			1.62146
			1.42144
			1.45549
			1.48912
			1.47575
			1.41919
			1.7573
			1.6484
			1.33296
			1.43601
			1.5305
			1.42408
			1.74573
			1.78923
			1.70889
			1.50535
			1.68575
			1.60637
			1.79697
			1.44611
			1.32118
			1.769
			1.86328
			1.20676
			1.67999
			1.5565
			1.70944
			1.69744
			1.7494
			1.68021
			1.87386
			1.62369
			1.57857
			1.74224
			1.53714
			1.75045
			1.53149
			1.42043
			1.70541
			1.44649
			1.37414
			1.78964
			1.36306
			1.74904
			1.57291
			1.58195
			1.61267
			1.34616
			1.67065
			1.75908
			1.37157
			1.9429
			1.48766
			1.66307
			1.51211
			1.37924
			1.38374
			1.60015
			1.43498
			1.72019
			1.51824
			1.79712
			1.35972
			1.38976
			1.61318
			1.60573
			1.66991
			1.68212
			1.59191
			1.45558
			1.653
			1.83457
			1.82967
			1.42632
			1.67254
			1.60247
			1.58514
			1.53914
			1.24854
			1.28844
			1.60536
			1.37694
			1.67711
			1.39418
			1.16797
			1.37476
			1.50552
			1.62788
			1.87025
			1.65659
			1.3907
			1.35657
			1.57202
			1.35179
			1.34442
			2.22206
			1.62641
			1.87316
			1.54025
			1.42777
			1.85073
			1.63007
			1.44921
			1.5744
			1.32266
			1.60616
			1.36256
			1.64297
			1.41735
			1.70351
			1.79036
			1.6382
			1.77919
			1.33848
			1.58771
			1.7098
			1.73491
			1.69199
			1.49494
			1.52255
			1.71896
			1.23461
			1.42692
			1.58503
			1.93213
			1.50637
			1.7091
			1.7137
			1.89423
			1.93467
			1.91179
			1.46707
			1.73256
			1.32712
			1.81111
			1.61043
			1.36814
			1.7215
			1.74713
			1.40913
			1.56702
			1.89451
			1.39041
			1.99738
			1.2805
			1.7447
			1.9338
			1.96908
			1.50087
			1.60164
			1.57683
			1.31643
			1.45161
			1.67577
			1.6588
			1.4859
			1.5823
			1.67084
			1.69424
			1.38884
			1.67953
			1.71705
			1.5344
			1.59745
			1.87001
			1.87584
			1.54066
			1.67279
			1.57006
			1.32403
			1.57151
			1.42804
			1.8102
			1.59303
			1.70836
			1.39069
			1.55028
			1.40513
			1.37637
			1.52479
			1.54515
			1.68237
			1.67199
			1.81848
			1.53161
			1.15662
			1.62529
			1.59414
			1.27516
			1.76147
			1.86445
			1.72144
			1.54473
			1.81496
			1.58608
			1.66886
			1.54334
			1.84483
			1.33434
			1.15886
			1.80638
			1.86299
			1.58387
			1.67311
			1.29035
			1.3242
			1.57441
			1.36285
			1.46328
			1.63692
			1.62578
			1.70567
			1.62714
			1.63854
			1.39946
			1.59389
			1.57011
			1.62409
			1.74045
			1.45009
			1.41636
			1.66046
			1.64203
			1.45456
			1.46098
			1.80747
			1.63224
			2.00453
			1.46601
			1.40384
			1.41461
			1.48517
			1.36733
			1.58711
			1.61632
			1.38865
			1.38642
			1.37759
			1.44555
			1.59566
			1.50395
			1.49515
			1.40742
			1.52654
			1.43931
			1.68249
			1.92091
			1.72844
			1.41783
			1.61093
			1.69601
			1.64201
			1.61955
			1.65138
			1.74588
			1.87103
			1.66505
			1.43127
			1.44316
			1.71599
			1.6178
			1.35467
			1.65073
			1.51011
			1.75208
			1.86107
			1.6977
			1.67383
			1.72174
			1.54664
			1.7306
			1.55763
			1.3753
			1.5368
			1.70649
			1.86702
			1.49084
			1.60891
			1.55126
			1.81405
			1.78472
			1.56636
			1.70761
			1.51271
			1.57
			1.47936
			1.72949
			1.64135
			1.81438
			1.70184
			2.01829
			1.64908
			1.67115
			1.69228
			1.72694
			1.75927
			2.33293
			1.55329
			2.14342
			1.97977
			1.67662
			1.55096
			1.5533
			1.52324
			1.76593
			1.48534
			1.70908
			2.15146
			1.97121
			1.61835
			1.68081
			1.92609
			1.30733
			1.51106
			1.67626
			2.04724
			1.34847
			1.83882
			1.62355
			1.65946
			1.71669
			1.55965
			1.80497
			1.59846
			1.67917
			1.45352
			1.69579
			1.94578
			1.67016
			1.5319
			1.90735
			1.29076
			1.92865
			1.51255
			1.51606
			1.894
			1.51315
			1.56281
			1.40262
			1.68321
			1.65807
			1.43777
			1.59731
			1.68534
			1.57683
			1.57756
			1.62294
			1.73104
			1.86964
			2.09736
			1.55084
			2
			2.01053
			1.62016
			1.56282
			1.78242
			1.70722
			1.73459
			1.36996
			1.66458
			1.5204
			1.54589
			1.72209
			1.5142
			1.517
			1.86963
			1.80677
			1.55435
			1.4466
			1.74568
			1.71558
			1.93433
			1.84124
			1.86953
			1.75233
			1.61136
			1.66194
			1.47629
			1.4432
			1.65992
			1.68748
			1.46635
			1.62162
			1.54294
			1.67925
			1.38827
			1.76779
			1.28997
			1.55111
			1.92573
			1.56435
			1.46324
			1.86878
			1.7838
			1.63519
			1.58451
			1.44814
			1.59682
			1.42165
			1.60589
			2.12731
			2.2221
			1.70779
			1.7845
			1.50265
			1.54407
			1.89052
			1.99867
			1.55955
			1.72672
			1.59429
			1.65623
			1.32288
			1.89409
			1.58642
			1.62491
			1.81492

## Sheet: Figure 7B
			eater-dsRed	dome-MESO-GFP
			5.496	22.527
			5.961	29.171
			6.62	29.155
			1.597	0.884
			5.147	27.186
			6.085	27.667
			7.612	30.798
			5.597	24.581
			4.318	27.434
			5.101	26.643
			5.481	27.442
			7.705	27.171
			5.481	26.558
			7.543	30.016
			5.953	27.612
			5.736	23.798
			5.512	24.698
			4.884	24.791
			5.434	25.085
			6.186	26.589
			6.085	25.279
			5.806	26.295
			4.434	25.054
			4.674	23.589
			4.62	24.225
			4.171	22.791
			5.333	23.876
			5.814	22.473
			5.295	24.597
			5.488	25.969
			6.171	26.519
			7.574	27.791
			6.217	29.047
			5.736	30.225
			1.31	2.109
			8.109	24.55
			3.884	12.039
			5.783	25.806
			5.163	24
			5.961	24.473
			4.116	22.636
			2.643	9.938
			4.953	20.566
			4.047	19.845
			5.527	23.163
			1.729	2.155
			4.86	23.016
			5.651	27.016
			5.426	27.612
			5.302	30.388
			1.659	2.194
			5.93	29.14
			6.977	28.527
			6.488	32.69
			8.341	33.69
			6.24	30.814
			5.814	24.612
			2.674	2.752
			5.171	24.62
			6.752	25.698
			5.085	27.062
			6.953	28.992
			5.922	30.264
			5.744	30.287
			2.473	3.217
			3.86	27.814
			4.705	29.047
			1.806	2.225
			7.845	30.651
			5.388	28.705
			4.457	22.612
			3.318	11.07
			4.217	23.667
			3.984	24.504
			3.31	2.597
			2.039	10.922
			4.395	20.682
			3.767	21.667
			3.279	22.357
			3.581	14.419
			2.93	16.171
			2.915	17.163
			2.465	14.233
			4.519	20.109
			4.233	17.922
			3.24	16.07
			3.147	18.442
			2.473	1.829
			3.69	19.527
			4.659	18.589
			4.047	17.915
			3.806	15.023
			3.597	17.395
			2.659	8.031
			2.287	16.798
			3.829	16.326
			3.271	16.403
			3.566	19.155
			3.814	19.589
			2.845	18.279
			4	18.822
			3.488	20.256
			5.512	21.209
			5.698	23.155
			3.194	24.186
			5.473	21.713
			4.775	23.279
			3.271	22.915
			4.953	26.256
			4.899	22.047
			4.442	22.085
			5.45	23.744
			4.767	24.38
			5.178	22.884
			5.256	24.202
			5.395	22.752
			4.504	20.752
			4.318	21.264
			4.295	22.047
			3.628	22.767
			3.845	20.512
			4.674	21.364
			4.264	18.225
			4.085	12.729
			4.031	18.566
			3.814	19.07
			4.884	18.38
			3.132	21.605
			4.535	19.519
			4.519	22.674
			4.217	17.698
			5.302	17.217
			2.76	18.667
			4.876	21.031
			2.512	18.767
			3.14	17.868
			1.527	11.341
			2.008	14.581
			3.515	17.175
			4.209	18.434
			2.845	18.085
			1.853	14.837
			3.69	15.969
			5.395	18.101
			4.814	17.233
			2.922	13.953
			3.093	14.302
			1.473	23.558
			3.078	17.829
			3.14	16.124
			2.047	9.349
			1.698	15.69
			2.481	12.729
			3.38	14.434
			3.853	13.969
			3.566	16.481
			3.178	15.357
			3.093	13.101
			2.163	16.326
			2.589	11.093
			1.38	10.062
			2.705	13.674
			2.953	12.078
			2.86	10.62
			2.891	11.333
			2.729	10.829
			2.287	11.287
			1.767	11.705
			3.016	10.349
			1.938	11.163
			2.341	10.287
			2	12.938
			3.302	12.636
			2.039	11.946
			2.14	12.209
			1.364	14.248
			1.698	16.574
			2.698	11.597
			3.395	11.256
			2.457	13.798
			2.078	12.705
			3.085	15.171
			2.775	14.457
			3.101	15.496
			3.078	11.62
			3.752	12.062
			3.225	10.395
			3	15.721
			1.853	11.101
			2.806	11.008
			3.535	12.566
			4.093	15.93
			4.822	17.736
			4.767	17.31
			4.465	18.209
			4.736	19.279
			4.543	21.271
			3.674	16.853
			4.907	19.38
			2.705	15.636
			1.961	7.07
			3.527	17.171
			3.155	16.093
			2.682	12.698
			3.287	17.907
			3.473	12.736
			3.752	14.101
			3.31	12.287
			3.915	11.868
			2.101	12.388
			2.388	12.287
			3.891	15.822
			5.473	46.581
			2.643	12.163
			0.535	2.597
			0.69	2.76
			0.736	2.558
			2.372	9.442
			3.705	11.705
			2.411	13.364
			5.163	12.101
			3.357	10.341
			2.806	10.915
			2.891	12.372
			3.279	12.698
			2.868	9
			2.527	13.465
			3.45	9.806
			2.333	12.504
			2.465	6.326
			1.085	3.581
			2.992	10.202
			2.519	8.008
			2.643	8.504
			2.907	12.078
			2.318	10.465
			1.566	8.938
			2.512	7.69
			1.62	8.349
			2.124	8.574
			2.147	9.116
			2.45	9.535
			1.767	2.473
			1.938	8.116
			1.829	9.574
			2.806	10.07
			1.744	8.318
			1.729	7.395
			3.372	8.031
			2.512	12.194
			1.597	8.938
			3.016	13.295
			2.946	5.961
			1.643	7.566
			2.698	8.527
			2.264	9.109
			2.767	6.171
			1.597	10.295
			2.729	8.388
			2.388	4.295
			1.713	1.016
			2.178	3.946
			1.907	8.442
			2.24	5.775
			2.628	5.558
			2.628	5.612
			2.45	6.349
			1.721	6.465
			1.264	0.837
			4.442	41.705
			2.426	7.527
			3.326	8.605
			2.822	6.992
			3.713	5.395
			4.341	5.047
			2.829	4.744
			1.86	5.527
			3.349	12.124
			5.271	49.24
			2.705	10.419
			3.853	10.961
			2.589	7.574
			3.085	11.155
			4.349	7.605
			1.946	14.605
			3.729	8.915
			2.946	10.628
			3.217	8.969
			2.403	9.667
			2.891	8.202
			3.581	17.078
			4.101	9.333
			4.558	8.481
			2.465	11.101
			4.558	9.349
			3.526	14.01
			3.411	10.744
			1.68	12.639
			3.535	13.318
			4.372	5.643
			4.66	12.577
			4.495	9.938
			3.722	8.598
			3.289	9.711
			3.66	4.588
			3.093	5.791
			4.031	13.474
			2.608	17.041
			4.392	16.443
			3.289	17.289
			3.423	16.804
			3.753	13.536
			3.134	12.165
			4.918	14.443
			3.496	11.426
			4.581	10.775
			4.411	11.907
			4.357	12.705
			2.775	6.922
			3.233	7.76
			4.078	11.651
			3.829	11.744
			4.341	12.76
			4.395	10.364
			4.636	2.674
			6.372	4.101
			5.783	5.574
			6.775	8.992
			5.752	4.209
			1.876	0.62
			5.667	7.612
			5.194	9.031
			6.078	7
			4.395	1.729
			3.674	4.907
			2.496	5.132
			3.558	7.295
			5.008	7.163
			2.225	5.946
			4.682	8.961
			6.07	8.581
			5.039	6.535
			5.767	7.76
			4.961	8.899
			3.357	16.419
			4	7.698
			1.853	2.791
			2.922	6.86
			5.101	6.457
			5.76	4.085
			3.791	1.465
			2.496	16.86
			5.217	4.349
			6.209	6.271
			7.364	7.109
			3.031	15.76
			7.364	10.434
			7.767	9.233
			6.752	12.186
			5.403	7.403
			5.767	5.016
			5.217	8.667
			5.876	5.969
			5.922	10.574
			4.884	7.659
			6.372	8.217
			5.264	8.667
			7.016	9.45
			6.946	10.977
			5.961	10.829
			6.977	14.946
			5.395	14.86
			4.984	10.442
			4.372	16.798
			6.14	16.674
			5.93	11.14
			4.721	11.767
			4.457	13.868
			4.922	9.264
			6.07	15.922
			6.69	11.729
			5.093	8.969
			6.574	5.078
			5.302	6.271
			6.806	7.984
			6.349	6.124
			4.271	8.953
			5.031	8.349
			3.178	5.512
			5.519	7.736
			3.225	1.519
			3.961	7.403
			4.589	8.868
			5.147	7.876
			6.054	10.729
			5.202	5.915
			6.45	13.333
			5.543	10.256
			6.186	10.31
			6.543	9.233
			4.465	12.93
			5.574	12.791
			5.442	9.605
			5.628	11.884
			6.395	9.178
			4.101	3.426
			5.984	9.62
			5.845	7.822
			5.395	11.163
			3.62	14.744
			5.977	12.116
			5.101	9.636
			5.457	12.147
			5.364	11.116
			4.496	11.233
			5.612	9.628
			7.651	8.605
			7.55	9.853
			7.023	6.527
			6.977	7.713
			7.93	4.248
			5.163	9.426
			5.783	10.155
			5.953	8.62
			4.667	7.814
			4.953	10.845
			5.798	12.767
			9.806	9.798
			6.256	7.814
			6.318	10.721
			6.202	9.775
			5.806	7.884
			2.264	14.69
			6.093	5.977
			2.597	14.132
			6.465	7.907
			6.612	7.264
			7.178	5.76
			7.38	5.915
			6.457	5.736
			5.178	4.636
			6.178	3.078
			7.667	4.837
			4.977	3.093
			8.783	3.76
			7.093	2.907
			9.039	2.256
			5.829	5.442
			7.047	6.682
			6.155	3.101
			8.845	4.729
			6.256	6.434
			6.031	3.264
			5.14	3.558
			6.093	4.023
			6.395	4.419
			7.829	3.744
			5.349	4.225
			6.62	4.736
			1.86	16.791
			6.178	5.488
			7.643	5.047
			4.798	5.519
			5.868	3.457
			7.209	7.326
			5.86	4.961
			2.698	2.783
			2.504	12.543
			7.124	5.155
			4.023	12.783
			7.155	5.543
			1.767	17.736
			6.744	6.295
			4.566	3.178
			6.45	8.767
			5.109	6.651
			6.14	7.07
			5.248	6.364
			7.031	5.016
			7.907	5.364
			5.899	3.984
			4.566	2.899
			7.07	5.233
			10.295	5.667
			2.938	9.023
			9.961	4.496
			9.14	3.984
			5.953	4.38
			7.713	3.186
			7.326	3.628
			5.093	3.364
			5.543	4.721
			5.884	5.643
			5.845	4.349
			5.736	3.566
			6.721	3.814
			6.566	6.155
			7.744	5.326
			8.651	4.574
			5.698	5.612
			7.271	5.891
			1.194	10.457
			7.814	3.922
			6.581	4.527
			6.543	5.465
			8.132	3.209
			7.868	4.822
			8.171	6.171
			7.527	9.14
			9.597	8.302
			9.457	8.473
			10.217	6.256
			10.581	6.364
			10.806	6.922
			9.357	4.736
			9.667	5.217
			8.961	4.775
			11.016	2.984
			11.357	5.047
			1.783	7.868
			1.922	14.938
			10.426	4.581
			10.558	5.326
			3.791	19.574
			12.853	5.395
			13.419	5.915
			9.705	6.302
			11.876	8.38
			8.426	5.953
			10.341	5.543
			9.535	6.961
			2.295	4.643
			7.326	5.837
			8.465	8.031
			9.023	5.86
			9.558	6.295
			7.729	4
			3.023	1.845
			8.388	5.116
			3.419	3.806
			6.984	4.767
			6.527	5.318
			3.116	3.295
			9.186	5.736
			6.76	6.806
			5.504	6.558
			3.643	4.915
			5.155	6.295
			4.574	5.643
			2.062	1.605
			4.969	4.93
			5.597	5.271
			1.829	2.016
			5.326	6.845
			4.899	2.039
			5.147	5.078
			2.628	11.248
			5.597	3.341
			7.55	8.264
			5.806	7.574
			3.612	3.178
			5.605	8.853
			5.76	7.822
			3.023	3.302
			7.899	8.341
			0.682	5.922
			6.574	6.574
			4.309	15.371
			5.31	7.186
			4.395	4.698
			7.085	6.628
			7.054	10.364
			5.38	4.302
			6.783	5.45
			7.217	3.876
			2.76	3.047
			7.209	5.302
			2.791	2.38
			7.233	8.535
			2.419	17.946
			4.868	12.55
			0.767	5.38
			7.054	4.93
			6.915	7.876
			9.101	8.62
			8.209	7.178
			9.062	7.674
			10.202	6.535
			13.488	3.202
			8.705	6.194
			8.845	6.426
			8.256	8.69
			8.302	5.853
			7.473	9.442
			8.93	8.566
			8.667	8.574
			9.287	7.163
			7.868	7.132
			6.628	2.643
			8.171	8.643
			0.147	5.442
			0.008	2.109
			6.512	7.287
			7.845	6.845
			7.581	8.643
			8.093	6.395
			8.628	8.527
			7.008	9.667
			7.178	9.698
			7.318	9.876
			7.078	8.643
			10.194	7.124
			4.465	10.86
			8.217	8.047
			6.721	7.853
			6.822	9.791
			5.977	7.55
			5.473	5.426
			2.109	1.155
			7.023	8.558
			6.86	7.915
			1.101	5.411
			7.977	9.054
			9.512	6.612
			7.721	6.194
			7.186	6.86
			7.589	7.907
			8.721	9.488
			8.202	8.442
			8.109	4.271
			7.791	8.845
			9.566	6.333
			7.202	8.248
			7.465	8.388
			7.481	10.403
			6.434	10.109
			7.496	9.612
			8.682	9.078
			2.364	23.31
			6.736	9.946
			7.977	10.171
			2.395	6.938
			7.527	9.698
			8.171	12.713
			1.643	7.163
			8.69	11.256
			8.264	11.403
			2.07	6.55
			9.295	10.876
			8.581	8.969
			7.907	9.155
			8.829	7.853
			7.039	8.116
			5.419	7.961
			8.248	8.07
			2.256	16
			8.434	8.031
			8.86	9.798
			8.93	9.163
			7.922	7.07
			1.767	1.93
			9.93	7.186
			11.977	7.085
			1.953	10.643
			2.504	2.101
			12.085	6.504
			12.147	6.597
			12.279	7.729
			12.209	7.093
			13.155	7.496
			2.465	10.38
			11.101	7.651
			7.829	7.899
			2.271	2.535
			8.357	8.643
			0.992	12.636
			8.14	7.085
			5.364	5.132
			5.411	6.566
			5.093	7.248
			6.488	7
			4.256	6.194
			5.899	6.636
			3.543	6.031
			6.233	7.031
			4.38	6.504
			5.853	5.512
			5.713	6.705
			5.605	5.372
			1.899	10.651
			7.372	5.543
			5.953	4.574
			2.798	4.202
			7.132	5.333
			0.829	4.853
			7.341	5.829
			8.589	4.884
			6.186	5.411
			1.899	10.853
			6.721	4.217
			6.605	4.853
			3.132	3.341
			5.899	4.736
			6.31	4.085
			5.775	3.868
			2.163	3.837
			6.519	4.341
			7.333	4.605
			2.023	2.69
			8.14	4.465
			10.915	4.109
			8.651	5.488
			8.457	4.899
			8.465	5.419
			8.69	5.729
			9.713	6.008
			11.806	6.806
			13.876	6.264
			10.488	5.357
			10.946	4.566
			9.209	5.729
			1.512	14.085
			6.287	4.822
			6.605	4.45
			6.992	4.93
			2.054	11.085
			7.682	1.798
			6.806	3.705
			8.465	4.798
			3.194	2.721
			7.721	4.24
			9.519	4.69
			12.651	3.876
			11.543	4
			9.364	4.225
			9.899	3.488
			8.07	3.961
			9.891	3.814
			8.884	3.69
			2.147	5.767
			11.411	4.318
			11.876	6.085
			12.791	5.605
			14.256	4.38
			11.163	5.101
			14.054	4.225
			1.039	6.977
			1.132	5.295
			12.426	4.62
			1.147	12.814
			1.039	6.977
			13.558	4.264
			10.326	4.884
			5.062	5.171
			8.302	4.752
			9.512	4.946
			9.047	4.527
			10.349	4.295
			0.659	6.76
			13.178	5.597
			0.558	4.062
			11.457	5.946
			9.775	5.225
			10.023	4.961
			9.884	5.558
			8.395	5.729
			0.961	7.295
			1.202	6.349
			9.434	3.961
			6.953	3.721
			7.651	3.915
			8.202	4.597
			5	4.225
			10.078	4.047
			9.721	4.24
			10.248	4.31
			9.287	4.426
			10.884	4.271
			12.039	5.093
			12.519	4.047
			0.961	7.488
			0.984	6.589
			0.326	5.039
			0.884	5.07
			0.457	4.76
			0.426	3.512
			10.713	3.225
			10.372	4.248
			10.271	3.023
			8.845	3.504
			9.194	3.085
			9.194	2.643
			7.791	2.667
			1.946	3.225
			7.473	3.496
			6.899	3.186
			5.295	2.891
			1.054	11.822
			0.806	6.333
			0.729	5.922
			0.729	5.45
			0.558	2.977
			6.698	1.163
			6.465	2.674
			6.295	2.605
			4.264	2.884
			3.612	2.504
			5.628	2.45
			6.008	4.62
			8.659	3.209
			6.504	4.705
			7.016	4.705
			5.853	3.612
			6.682	3.411
			1.217	4.194
			5.791	3.488
			7.589	4.062
			6.667	3.217
			7.744	3.86
			2.783	3.016
			7.264	3.783
			7.837	3.178
			7.814	3.628
			8.124	4.543
			8.535	4.488
			8.31	4.101
			7.357	3.504
			7.744	3.744
			6.977	4.496
			3.202	3.264
			6.984	4.736
			6.264	4.612
			2.907	2.38
			7.155	3.853
			6.178	3.465
			1.101	2.163
			6.202	3.326
			6.333	4.682
			1.264	8.217
			7.597	3.721
			7.729	4.31
			6.488	4.008
			1.876	13.07
			6.713	4.008
			8.093	3.628
			7.411	4.783
			6.062	4.473
			8.434	4.473
			6.806	5
			13.333	0.977
			6.233	5.24
			8.031	4.643
			5.116	4.899
			6.171	3.682
			0.682	7.202
			0.667	6.946
			0.605	6.651
			0.372	3.783
			0.45	3.279
			1.992	2.271
			7.45	3.829
			0.527	6.605
			7.566	4.209
			6.946	5.093
			3.349	3.473
			7.426	5.667
			8.357	4.984
			11.822	1.837
			9.186	5.299
			7.454	4.175
			11.309	3.928
			9.233	4.039
			9.474	5.33
			9.144	4.031
			5.915	3.527
			7.698	3.457
			6.814	3.402
			4.928	3.526
			5.897	3.258
			5.794	2.732
			6.134	2.629
			5.206	2.371
			6.144	2.928
			7.505	1.753
			5.99	3.608
			7.031	2.567
			7.814	3.155
			5.504	2.178
			6.567	3.34
			5.371	2.742
			0.69	4.612
			5.577	2.371
			6.299	2.68
			7.299	3.216
			8.052	3.526
			0.155	5.194
			0.233	4.938
			10.505	3.701
			0.891	6.062
			0.775	6.341
			7.351	2.268
			6.86	4.411
			9.103	2.814
			8.68	3.619
			7.113	3.588
			10.557	2.309
			10.546	4.031
			11.876	4.402
			10.289	4.165
			12.134	3.67
			11.433	3.165
			0.775	4.698
			9.99	3.866
			1.961	2.271
			10.68	4.68
			12.041	2.938
			10.186	4.608
			11.794	2.227
			1.473	8.171
			1.674	7.364
			1.62	7.512
			9.639	2.474
			9.68	1.206
			9.216	2.247
			9.629	3.268
			9.62	3.008
			16.33	2.443
			10.388	3.682
			9.938	2.853
			9.163	3.628
			12.124	3.868
			9.124	2.66
			12.649	3.381
			10.132	3.163
			11.364	3.535
			8.364	3.302
			8.271	2.31
			9.093	2.357
			11.682	1.054
			9.667	2.535
			8.868	2.016
			8.388	2.364
			6.969	2.302
			8.835	2.268
			8.512	3.233
			12.054	2.589
			0.783	9.372
			0.558	8.101
			10.155	2.287
			11.884	2.899
			0.992	10.349
			0.899	10.38
			13.884	2.605
			0.372	5.426
			10.698	2.713
			0.357	4.775
			10.984	2.388
			10.078	2.907
			0.636	4.116
			2.24	2.62
			8.922	2.659
			8.078	3.194
			9.856	2.598
			11.041	2.711
			11.557	2.845
			1.093	10.512
			4.256	1.961
			17.196	2.897
			10	1.825
			9.546	2.186
			10.237	1.918
			8.959	2.299
			7.271	2.287
			8.341	2.264
			7.628	1.69
			9.264	1.783
			0.752	4.279
			6.209	2.31
			6.395	1.891
			4.597	3.946
			8.295	1.589
			6.124	1.711
			5.302	1.465
			9.814	2.412
			8.031	2.62
			9.326	2.039
			7.45	1.922
			0.287	2.217
			8.062	2.163
			9.69	2.023
			11.14	3.054
			17.659	1.442
			13.411	2.535
			9.581	2.822
			9.636	1.946
			10.659	2.597
			8.922	2.186
			8.318	1.891
			7.457	1.705
			5.698	1.86
			6.341	1.574
			5.907	1.922
			6.039	2.426
			8.341	1.736
			8.659	1.705
			7.744	2.434
			6.45	2.093
			8.798	2.14
			11.147	2.326
			12.217	2.946
			15.773	3.464
			10.643	1.202
			9.093	2.047
			9.488	2.581
			8.147	2.163
			15.395	1.845
			9.93	2.953
			9.76	2.14
			11.008	1.907
			7.147	1.814
			8.419	2.062
			7.078	1.891
			8.054	1.783
			8.039	1.829
			8.527	2.039
			7.791	1.605
			10.047	2.705
			10.876	3.085
			9.721	2.287
			8.504	2.054
			7.248	2.512
			10.163	1.853
			8.016	2.233
			7.783	2.364
			7.612	1.721
			8.907	2.256
			7.744	1.512
			6.264	2.039
			6.171	1.744
			5.008	2.527
			5.566	2.628
			5.186	1.891
			6.318	2.186
			10.287	2.488
			7.023	2.744
			9.302	2.636
			8.085	2.388
			11.992	0.953
			11.295	2.806
			8.233	2.62
			9.543	2.519
			10.845	2.899
			11.845	3.132
			10.93	3
			9.248	2.806
			10.178	2.302
			9.078	2.496
			11.349	3.333
			10.938	2.814
			9.256	2.434
			9.326	2.744
			11.279	2.589
			10.651	3.109
			11.403	2.38
			12.403	2
			11.101	2.791
			10.008	2.279
			9.008	2.271
			10.419	1.899
			9.868	2.395
			12.543	2.318
			12	2.101
			10.891	2.233
			9.969	2.845
			9.837	1.853
			9.186	2.38
			9.853	1.729
			8.667	2.109
			6.101	1.837
			7.364	2.411
			9.535	1.651
			9.178	1.876
			12.636	1.147
			9.481	2.612
			10.845	3.147
			9.938	1.705
			12.295	3.031
			10.907	3.395
			13.078	2.984
			12.008	2.062
			12.326	1.977
			11.078	2.465
			12.721	3.372
			16.14	2.488
			19.031	4.016
			18.628	4.155
			18.295	3.636
			22.62	4.155
			21.341	3.969
			20.612	4.016
			19.721	4.023
			16.93	3.829
			3.403	2.69
			16.775	3.69
			13.69	3.14
			16.643	3.155
			16.938	3.023
			23.667	1.798
			18.558	2.86
			17.698	3.488
			19.899	3.55
			20.403	2.961
			26.016	3.101
			25.791	4.395
			24.093	3.729
			25.775	4.527
			29.287	5.302
			26.202	3.961
			25.225	4.488
			22.667	3.636
			22.938	4.643
			21.853	3.101
			23.969	3.527
			28.186	3.891
			27	4.256
			23.705	4.488
			22.225	3.341
			7.62	1.225
			25.829	4.853
			25.24	3.791
			27.853	4.302
			31.752	5.31
			31.829	4.729
			35.155	5.519
			30.496	5.481
			26.388	4.667
			24.31	5.535
			23.388	3.876
			22.008	3.093
			21.674	3.907
			24.713	4.186
			24.736	3.426
			25.419	3.419
			30.837	3.589
			26.814	4.481
			26.388	4.016
			21.256	3.713
			21.674	4.287
			25.62	4.372
			34.194	3.225
			31.147	5.093
			32.775	5.698
			33.581	5.248
			29.76	4.907
			27.07	4.612
			25.961	4.953
			26.442	4.465
			25.69	3.248
			20.519	4.442
			25.271	3.62
			24.915	2.946
			24.907	4.302
			22.155	4.093
			25.605	4.295
			31.078	4.457
			34.419	5.481
			35.86	5.907
			37.814	7.078
			33.31	5.388
			35.884	6.543
			37.434	5.667
			38.24	6.279
			37.14	6.496
			36.116	6.465
			37.287	5.876
			33.031	5.481
			30.302	6.481
			24.822	4.023
			25.705	3.876
			29.426	4.558
			33.566	3.264
			31.512	5.333
			32.829	4.806
			33.496	3.705
			34.853	6.326
			35.899	5.333
			33.225	6.016
			31.512	5.186
			30.984	4.31
			36.651	5.93
			38.651	4.814
			36.442	5.062
			43.744	6.171
			38.984	5.147
			41.829	6.07
			42.186	5.783
			38.364	6.992
			41.891	5.612
			34.333	5.426
			27.504	5.388
			33.271	5.008
			25.62	5.178
			28.605	3.953
			24.512	4.62
			29.512	5.581
			28.287	4.907
			29.899	3.822
			26.884	5.279
			29.953	5.233
			29.155	5.667
			32.124	5.806
			36.295	5.364
			35.961	5.116
			30.922	4.698
			29.248	4.822
			27.814	5.326
			30.426	4.953
			28.419	5.767
			28.589	5.287
			27.008	5.341
			28.798	4.62
			30.736	4.38
			27.411	5.109
			29.248	4.31
			29.349	4.271
			32.899	4.109
			27.256	4.504
			28.271	4.186
			27.527	4.287
			29.55	4.721
			29.147	3.853
			29.984	1.984
			26.535	3.915
			26.233	3.798
			24.403	4.147
			26.341	5.016
			26.69	4.651
			24.24	3.938
			25.806	4.798
			25.264	4.171
			25.279	4.543
			25.891	4.512
			29.062	4.93
			28.837	4.302
			27.597	4.132
			29.047	3.729
			30.969	3.791
			31.194	5.667
			34.752	5.403
			29.419	4.806
			32.031	5.302
			36.853	6.465
			35.109	5.341
			37.977	4.791
			38.256	7.124
			35.651	5.806
			39.426	5.411
			24.256	3.434
			36.558	6.752
			35.837	6.202
			40.031	5.969
			35.651	5.589
			37.194	5.891
			37.155	5.31
			40.016	5.419
			36.829	5.589
			40.946	6.24
			38.411	7.062
			36.953	5.271
			42.969	4.039
			37.279	4.488
			37.69	5.062
			38.016	5.682
			36.876	5.341
			31.938	6.085
			31.938	6.178
			36.38	6.364
			28.845	4.93
			32.202	5.682
			34.775	4.566
			34.488	5.597
			31.109	5.395
			30.163	5.186
			32.434	4.426
			32.55	5.171
			35.465	5.372
			35.124	4.38
			36.481	5.984
			37.868	6.217
			36.101	5.566
			39.403	7.233
			37.364	4.341
			33.783	5.047
			38	5.899
			36.736	5.899
			36.806	6.302
			35.977	3.039
			36.31	5.403
			34.302	5.357
			33.984	5.527
			31.178	5.333
			29.163	4.674
			33.271	4.442
			32.868	5.155
			33.062	4.558
			36.109	5.287
			34.558	5.899
			39.961	5.907
			37.411	6.14
			43.736	6.124
			43.698	6.116
			43.814	5.822
			40.38	6.736
			39.434	6.271
			44.566	6.698
			41.69	5.364
			42.287	5.729
			36.907	5.271
			33.93	6.047
			39.078	5.372
			37.496	6.411
			38.209	4.465
			39.295	5.876
			34.574	5.481
			35.326	5.116
			40.969	3.992
			39.163	4.868
			34.876	5.705
			38.853	6.24
			35.403	6.357
			38.364	5.915
			40.86	5.395
			38.388	5.961
			37.899	6.093
			37.171	5.798
			39.984	5.039
			42.31	5.302
			36.512	6.333
			39.116	6.062
			40.767	6.767
			42.155	6.326
			40.783	5.209
			42.023	5.147
			39.884	5.178
			38.946	5.388
			38.504	6.589
			42.55	1.791
			38.992	6.295
			44.612	6.116
			40.643	5.837
			43.078	5.783
			35.194	3.837
			40.93	6.643
			41.504	4.868
			41.798	5.434
			41.264	5.674
			39.318	5.403
			41.078	5.132
			38.233	5.605
			36.504	5.775
			38.868	7.016
			39.636	5.977
			40.558	5.845
			38.178	5.465
			38.457	6.38
			41.589	1.891
			36.752	5.674
			37.698	6.969
			42.597	5.822
			41.271	6.798
			43.465	5.798
			37.372	6.078
			39.093	5.171
			38.612	6.868
			37.992	6.302
			38.101	6.512
			40.946	1.155
			39.667	6.473
			42.736	6.519
			41.473	6.597
			40.535	5.543
			40.411	5.388
			39.225	5.527
			40.465	5.806
			42.581	5.922
			40.248	7.24
			37	6.729
			40.016	1.426
			38.14	6.636
			41.31	6.372
			46.628	6.271
			45.473	4.729
			38.845	5.93
			44.085	6.674
			39.767	6.163
			43.798	3.659
			45.566	5.907
			38.969	6.775
			46.271	6.442
			39.682	6.729
			40.465	5.442
			40.202	5.558
			43.217	6.109
			40.767	5.504
			41.729	5.682
			43.078	6.504
			44.922	6.907
			42.69	5.977
			44.767	5.651
			45.217	5.698
			43.504	5.093
			45.636	5.209
			45.209	4.628
			45.628	6.326
			42.845	5.473
			45.845	6.326
			45.31	5.922
			45.527	7.256
			46.233	5.488
			42.62	5.845
			44.558	6.047
			42.101	5.256
			45.403	6.171
			45.186	5.636

## Sheet: Figure 7B.
			Normalizaed intensity
			eater-dsRed	dome-MESO-GFP
			0.062494	0.963848
			0.003497	0.875284
			0.016259	0.886774
			0.050368	0.770233
			0.038423	0.905668
			0.041739	0.854528
			0.065764	0.767599
			0.011945	0.892724
			0.111818	0.709011
			0.085294	0.495912
			0.077891	0.765328
			0.041103	0.753384
			0.032473	0.896221
			0.081797	0.782178
			0.087746	0.789581
			0.125352	0.727723
			0.037197	0.814833
			0.115088	0.854528
			0.04133	0.767781
			0.046235	0.725679
			0.063085	0.717867
			0.068626	0.548733
			0.049959	0.626169
			0.197702	0.717004
			0.077709	0.705514
			0.106277	0.609547
			0.10932	0.614906
			0.049959	0.766963
			0.065991	0.717231
			0.101326	0.726088
			0.107503	0.741893
			0.095558	0.736943
			0.089836	0.651876
			0.113861	0.85144
			0.101735	0.748887
			0.072123	0.835407
			0.068217	0.874239
			0.161323	0.671178
			0.085067	0.847307
			0.105823	0.831501
			0.132346	0.348124
			0.076665	0.739032
			0.06472	0.863566
			0.109138	0.621264
			0.04955	0.914116
			0.096194	0.682078
			0.08384	0.983377
			0.06472	0.760787
			0.042556	0.788355
			0.194023	0.979244
			0.049323	0.787083
			0.061041	0.959715
			0.037833	0.900127
			0.056318	0.856572
			0.085294	0.562267
			0.077482	0.855346
			0.043964	0.788945
			0.060223	0.664411
			0.022618	0.913889
			0.015215	0.790808
			0.028795	0.898083
			0.05818	0.829639
			0.051594	0.781951
			0.019757	0.830866
			0.042965	0.768598
			0.025888	0.854937
			0.070488	0.711872
			0.068626	0.877101
			0.054274	0.889045
			0.111	0.810519
			0.091244	0.771914
			0.060632	0.829231
			0.048279	0.885321
			0.06967	0.74866
			0.064947	0.620629
			0.070715	0.586338
			0.044827	0.794305
			0.10605	0.726088
			0.127032	0.813607
			0.150241	0.540694
			0.055909	0.695022
			0.089609	0.821237
			0.178808	0.891907
			0.107503	0.669543
			0.071305	0.791625
			0.10605	0.535335
			0.140385	0.702017
			0.090653	0.762876
			0.111	0.864157
			0.136661	0.615905
			0.042965	0.68662
			0.051367	0.722999
			0.112817	0.688664
			0.104596	0.71437
			0.118585	0.784858
			0.073985	0.682714
			0.036788	0.706967
			0.096603	0.619811
			0.065991	0.629485
			0.090426	0.638932
			0.059406	0.6447
			0.042329	0.575438
			0.05282	0.654964
			0.044827	0.708602
			0.07294	0.502453
			0.052412	0.629485
			0.046871	0.560632
			0.06967	0.445136
			0	0.658234
			0.045417	0.568035
			0.042738	0.585521
			0.087565	0.527568
			0.014397	0.639159
			0.044827	0.749705
			0.008856	0.632573
			0.088564	0.569489
			0.06145	0.661958
			0.121264	0.712508
			0.077709	0.664411
			0.051185	0.553048
			0.028976	0.556545
			0.07235	0.710464
			0.023435	0.703243
			0.050368	0.638932
			0.050368	0.329458
			0.010673	0.638705
			0.029203	0.609547
			0.06472	0.744164
			0.058361	0.582614
			0.0337	0.751749
			0.095377	0.353075
			0.0218	0.560451
			0.002453	0.663593
			0.005359	0.520756
			0.053456	0.532292
			0.047279	0.506813
			0.023208	0.57235
			0.000409	0.571714
			0.038241	0.676129
			0.081797	0.622264
			0.058997	0.595785
			0.0783	0.418022
			0.018894	0.509265
			0.039649	0.511945
			0.034517	0.569489
			0.045644	0.417613
			0.074394	0.392951
			0.078527	0.451494
			0.087338	0.415115
			0.037015	0.52775
			0.020347	0.601962
			0.003315	0.659915
			0.025297	0.708784
			0.09742	0.626169
			0.047279	0.729131
			0.085703	0.363157
			0.074621	0.671814
			0.048097	0.676537
			0.085067	0.74539
			0.052412	0.648379
			0.063312	0.649605
			0.087973	0.611999
			0.082841	0.277636
			0.074802	0.61695
			0.130302	0.764693
			0.140158	0.756472
			0.080979	0.570897
			0.147788	0.810927
			0.097012	0.705514
			0.100509	0.696703
			0.135662	0.770461
			0.10932	0.74539
			0.129076	0.629076
			0.080343	0.785857
			0.13439	1
			0.123127	0.747434
			0.07235	0.666273
			0.091471	0.834363
			0.083023	0.671587
			0.116723	0.607094
			0.069897	0.606277
			0.0892	0.73449
			0.139568	0.789172
			0.092697	0.604415
			0.071714	0.753792
			0.106277	0.759787
			0.096603	0.460759
			0.04955	0.728313
			0.135843	0.665456
			0.097193	0.721955
			0.137887	0.699564
			0.13707	0.559179
			0.106685	0.643655
			0.097193	0.742529
			0.044827	0.822055
			0.128032	0.864565
			0.159279	0.598874
			0.061677	0.746843
			0.151058	0.749886
			0.098465	0.620629
			0.099055	0.690708
			0.105641	0.680035
			0.132755	0.846489
			0.100509	0.66482
			0.168317	0.758743
			0.07235	0.713325
			0.115315	0.666046
			0.086747	0.839904
			0.163185	0.668726
			0.109728	0.468753
			0.053638	0.679217
			0.085294	0.741257
			0.112817	0.860069
			0.10337	0.600509
			0.059996	0.682487
			0.024662	0.77641
			0.080343	0.600917
			0.059179	0.650422
			0.098647	0.4772
			0.091652	0.499591
			0.035562	0.590653
			0.044191	0.549959
			0.135843	0.494459
			0.071124	0.593514
			0.098465	0.562494
			0.108093	0.571714
			0.123127	0.579526
			0.139976	0.597647
			0.116541	0.558997
			0.133391	0.508039
			0.11427	0.527114
			0.092288	0.567399
			0.171587	0.512762
			0.139113	0.534108
			0.113634	0.631938
			0.113226	0.599282
			0.146108	0.518894
			0.135843	0.53043
			0.170179	0.517667
			0.111999	0.534108
			0.233854	0.579344
			0.193206	0.448406
			0.150831	0.505768
			0.149196	0.49405
			0.150831	0.515442
			0.140158	0.499818
			0.146108	0.512126
			0.18394	0.5446
			0.088382	0.478427
			0.07294	0.601099
			0.083023	0.60605
			0.135253	0.55877
			0.11695	0.449269
			0.051185	0.504133
			0.07503	0.512762
			0.082614	0.518076
			0.065583	0.404442
			0.080979	0.473295
			0.048915	0.555273
			0.071124	0.471432
			0.090835	0.377328
			0.146744	0.561268
			0.091879	0.417795
			0.074212	0.42111
			0.06472	0.513171
			0.108911	0.364565
			0.110137	0.315651
			0.132346	0.39395
			0.091062	0.463212
			0.134617	0.442047
			0.121446	0.3662
			0.098238	0.394586
			0.088791	0.391316
			0.136661	0.497139
			0.145926	0.324507
			0.117949	0.417386
			0.119811	0.464847
			0.105005	0.361704
			0.125988	0.405668
			0.183123	0.397448
			0.144064	0.411436
			0.150422	0.380007
			0.124353	0.381642
			0.101508	0.35966
			0.226269	0.402988
			0.118358	0.30743
			0.099873	0.380416
			0.101326	0.414297
			0.075211	0.400536
			0.102552	0.375466
			0.163366	0.383096
			0.112408	0.357798
			0.100282	0.381824
			0.102371	0.361704
			0.084476	0.425606
			0.131347	0.440821
			0.136888	0.435689
			0.154964	0.378327
			0.139568	0.460759
			0.15392	0.39604
			0.28404	0.401989
			0.1447	0.365792
			0.165864	0.460351
			0.205741	0.436098
			0.235126	0.483559
			0.218276	0.442865
			0.206331	0.499818
			0.274775	0.48256
			0.209647	0.418612
			0.219093	0.505541
			0.175493	0.530021
			0.198746	0.419248
			0.241257	0.467935
			0.194432	0.436915
			0.218685	0.490553
			0.213098	0.4445
			0.260378	0.441457
			0.196884	0.4663
			0.199337	0.451721
			0.195249	0.426015
			0.253611	0.485194
			0.163366	0.436734
			0.239849	0.369925
			0.213961	0.414706
			0.217004	0.395813
			0.219275	0.388001
			0.216187	0.425016
			0.266328	0.461986
			0.227496	0.39931
			0.161958	0.411618
			0.30684	0.412072
			0.255246	0.406304
			0.258743	0.402171
			0.327369	0.450268
			0.194613	0.416977
			0.261831	0.415115
			0.235307	0.399537
			0.269007	0.395177
			0.275593	0.449042
			0.333364	0.42438
			0.214779	0.434463
			0.255473	0.439777
			0.228949	0.433009
			0.269234	0.384322
			0.255064	0.387592
			0.188028	0.403624
			0.194023	0.42706
			0.301708	0.340312
			0.246843	0.361886
			0.176129	0.372786
			0.338269	0.423335
			0.240848	0.361886
			0.234899	0.364384
			0.246616	0.381824
			0.314016	0.480062
			0.274548	0.414706
			0.284631	0.446589
			0.412254	0.432192
			0.339313	0.400354
			0.205922	0.462803
			0.328822	0.41943
			0.373603	0.454583
			0.27314	0.399537
			0.296348	0.361295
			0.246843	0.405078
			0.333137	0.474748
			0.290172	0.487465
			0.326551	0.357389
			0.28999	0.42765
			0.227496	0.400536
			0.344627	0.448406
			0.34876	0.429739
			0.322055	0.459942
			0.313834	0.454583
			0.261014	0.441639
			0.359433	0.473703
			0.329639	0.403851
			0.263285	0.483559
			0.262649	0.460941
			0.222182	0.430738
			0.283586	0.367881
			0.262013	0.385321
			0.286675	0.397856
			0.210055	0.392542
			0.219684	0.400354
			0.299846	0.460351
			0.368471	0.368062
			0.215188	0.408756
			0.288128	0.438142
			0.176764	0.394768
			0.198519	0.364384
			0.218049	0.360887
			0.23776	0.415978
			0.246208	0.417795
			0.284858	0.442683
			0.187846	0.354119
			0.22091	0.36561
			0.166455	0.384095
			0.246208	0.419248
			0.20942	0.386774
			0.259379	0.393542
			0.251567	0.329231
			0.292034	0.370106
			0.23717	0.356981
			0.269007	0.362113
			0.364565	0.383504
			0.246843	0.360251
			0.264693	0.363157
			0.240667	0.339313
			0.243346	0.376692
			0.248479	0.41843
			0.268598	0.383277
			0.303116	0.388637
			0.273731	0.375057
			0.347125	0.434463
			0.353075	0.375693
			0.232219	0.380825
			0.239622	0.383686
			0.307657	0.418839
			0.304342	0.376101
			0.371151	0.38741
			0.264693	0.39068
			0.370106	0.367063
			0.272504	0.35966
			0.418022	0.329458
			0.296984	0.367063
			0.28999	0.395404
			0.241075	0.351848
			0.227314	0.388001
			0.233037	0.368698
			0.371787	0.43796
			0.248887	0.390453
			0.32101	0.386956
			0.331274	0.418612
			0.377328	0.425016
			0.356163	0.371968
			0.240031	0.405486
			0.274957	0.415115
			0.348124	0.414933
			0.285448	0.437551
			0.267781	0.382641
			0.361704	0.44945
			0.298619	0.343628
			0.336407	0.324689
			0.272096	0.344445
			0.356981	0.361704
			0.286266	0.370742
			0.346716	0.349986
			0.290808	0.318739
			0.385957	0.409392
			0.297575	0.335589
			0.388001	0.336815
			0.294713	0.313607
			0.287083	0.351848
			0.295122	0.338905
			0.34281	0.330866
			0.35144	0.331501
			0.397039	0.327369
			0.332319	0.349169
			0.438959	0.374012
			0.389045	0.322055
			0.360069	0.402988
			0.303751	0.359842
			0.380189	0.337224
			0.478654	0.422109
			0.4772	0.422109
			0.401581	0.388409
			0.313017	0.343628
			0.330275	0.353484
			0.404033	0.340948
			0.381642	0.361704
			0.409165	0.395404
			0.483968	0.423335
			0.539059	0.370742
			0.447407	0.375284
			0.447815	0.426833
			0.400763	0.35471
			0.506586	0.422927
			0.446589	0.402807
			0.509265	0.361477
			0.513171	0.390272
			0.475338	0.388637
			0.490553	0.454583
			0.456853	0.398265
			0.516032	0.409165
			0.611	0.459942
			0.524253	0.413071
			0.446589	0.376283
			0.496321	0.388001
			0.443092	0.353892
			0.441639	0.371151
			0.392542	0.329866
			0.501226	0.385321
			0.563494	0.459124
			0.543374	0.364792
			0.452948	0.406077
			0.484785	0.356163
			0.541511	0.401581
			0.502044	0.404033
			0.469616	0.360659
			0.505132	0.445136
			0.635662	0.368698
			0.533109	0.345672
			0.528976	0.318966
			0.625761	0.378781
			0.527341	0.392134
			0.44618	0.401989
			0.437324	0.377736
			0.377918	0.350395
			0.472068	0.377328
			0.500818	0.357162
			0.481515	0.309701
			0.487056	0.39663
			0.419657	0.323281
			0.454991	0.322872
			0.384912	0.340131
			0.433418	0.343628
			0.54133	0.348942
			0.463439	0.369107
			0.398492	0.345899
			0.441048	0.338905
			0.41616	0.317104
			0.382051	0.358616
			0.458307	0.369698
			0.39931	0.362522
			0.434871	0.32101
			0.426424	0.333545
			0.460124	0.369698
			0.430738	0.344037
			0.427877	0.339086
			0.312562	0.346308
			0.479653	0.278681
			0.425016	0.349578
			0.446362	0.429512
			0.430966	0.36888
			0.442683	0.338496
			0.483559	0.357389
			0.598647	0.443501
			0.485421	0.36561
			0.426242	0.340131
			0.455218	0.236534
			0.438142	0.348533
			0.409392	0.333545
			0.449269	0.32696
			0.475338	0.403397
			0.637706	0.389454
			0.577709	0.429739
			0.466936	0.414933
			0.437142	0.397675
			0.520347	0.397039
			0.441048	0.39068
			0.491779	0.361886
			0.444727	0.355754
			0.563312	0.405895
			0.40426	0.377918
			0.471024	0.389636
			0.432601	0.36888
			0.493006	0.360887
			0.597193	0.436506
			0.425833	0.350213
			0.441048	0.353484
			0.456445	0.35798
			0.548733	0.390272
			0.609547	0.406304
			0.417795	0.380825
			0.503497	0.348124
			0.469162	0.349351
			0.508629	0.371787
			0.481697	0.363157
			0.533109	0.367654
			0.458307	0.409165
			0.479471	0.361704
			0.630075	0.401353
			0.606277	0.397039
			0.471251	0.380416
			0.438142	0.398901
			0.471841	0.353256
			0.505768	0.367654
			0.531247	0.415978
			0.565991	0.39395
			0.557544	0.37056
			0.470433	0.357162
			0.409983	0.34281
			0.601735	0.401762
			0.523208	0.366655
			0.508221	0.353892
			0.540285	0.402171
			0.391907	0.366836
			0.451313	0.369925
			0.448633	0.355936
			0.541103	0.391089
			0.561677	0.391725
			0.55282	0.428922
			0.425606	0.38741
			0.437733	0.343219
			0.527977	0.418612
			0.461986	0.375874
			0.535562	0.364157
			0.511309	0.372377
			0.554274	0.434054
			0.5228	0.367472
			0.561858	0.362522
			0.343628	0.377328
			0.508629	0.383504
			0.490372	0.347943
			0.498774	0.376283
			0.483559	0.356572
			0.495685	0.325325
			0.457035	0.333954
			0.450086	0.361704
			0.542738	0.352848
			0.426242	0.342992
			0.486011	0.340721
			0.507221	0.380007
			0.5228	0.307839
			0.42706	0.314243
			0.488918	0.400945
			0.513761	0.356163
			0.505132	0.354119
			0.413071	0.315469
			0.37156	0.29594
			0.522209	0.36293
			0.448406	0.32696
			0.441457	0.310746
			0.448815	0.308702
			0.475565	0.340721
			0.605232	0.348942
			0.494686	0.298801
			0.529794	0.298619
			0.489327	0.331093
			0.463848	0.310337
			0.512354	0.376919
			0.516032	0.36561
			0.538014	0.209192
			0.588791	0.380007
			0.532882	0.347716
			0.45213	0.323871
			0.506586	0.359433
			0.555909	0.354301
			0.396857	0.316287
			0.463439	0.312154
			0.449042	0.377328
			0.49405	0.293078
			0.481288	0.301072
			0.574212	0.290399
			0.462621	0.307249
			0.473067	0.319784
			0.529612	0.320601
			0.5	0.308475
			0.382233	0.290399
			0.559179	0.329639
			0.538014	0.338269
			0.600282	0.416795
			0.545009	0.321828
			0.461395	0.29326
			0.556726	0.328004
			0.510083	0.339313
			0.490372	0.14529
			0.461395	0.318558
			0.413707	0.295713
			0.492597	0.338496
			0.428059	0.318149
			0.45213	0.316923
			0.458897	0.287946
			0.346716	0.271278
			0.401989	0.223181
			0.360659	0.226678
			0.389454	0.28731
			0.432374	0.318966
			0.468753	0.255064
			0.382051	0.222182
			0.450677	0.228132
			0.378963	0.202244
			0.381415	0.293896
			0.466119	0.279907
			0.339313	0.251976
			0.367654	0.275184
			0.423744	0.285267
			0.471841	0.255064
			0.453356	0.37919
			0.515851	0.261422
			0.498138	0.329458
			0.459533	0.29267
			0.421928	0.29594
			0.397448	0.280725
			0.364384	0.284631
			0.523027	0.287492
			0.388228	0.310337
			0.450268	0.261422
			0.474748	0.349169
			0.499001	0.328004
			0.442275	0.288355
			0.382233	0.29267
			0.342175	0.232037
			0.384504	0.269007
			0.412481	0.328822
			0.354937	0.255473
			0.35798	0.296121
			0.351031	0.288128
			0.539876	0.119629
			0.501453	0.272096
			0.499182	0.274775
			0.425833	0.251158
			0.423563	0.24866
			0.432374	0.247025
			0.414116	0.244573
			0.370106	0.301481
			0.383504	0.257517
			0.344854	0.239849
			0.469616	0.303933
			0.359842	0.255473
			0.358843	0.254201
			0.30743	0.20615
			0.400763	0.184531
			0.320193	0.225225
			0.295713	0.172223
			0.328186	0.206967
			0.345672	0.200972
			0.281769	0.196476
			0.317513	0.221955
			0.37651	0.235943
			0.343401	0.20674
			0.379599	0.164002
			0.381824	0.234899
			0.292851	0.188028
			0.300481	0.196067
			0.36234	0.19584
			0.277864	0.207785
			0.523208	0.228132
			0.423563	0.30743
			0.386547	0.287492
			0.434644	0.216414
			0.447588	0.239032
			0.32696	0.236352
			0.430148	0.269416
			0.355936	0.235716
			0.364384	0.240848
			0.380598	0.267599
			0.386547	0.1893
			0.357389	0.182487
			0.330866	0.042556
			0.34281	0.222772
			0.317922	0.197111
			0.277046	0.182487
			0.341539	0.162958
			0.370969	0.235535
			0.366427	0.222591
			0.325733	0.195022
			0.333772	0.198111
			0.345899	0.176946
			0.375874	0.232855
			0.319557	0.220501
			0.309928	0.215188
			0.376283	0.187846
			0.423335	0.259152
			0.327777	0.207557
			0.342402	0.202652
			0.492824	0.18394
			0.41021	0.235126
			0.406077	0.227496
			0.394768	0.21169
			0.341539	0.239849
			0.34608	0.227496
			0.314425	0.199564
			0.380189	0.237578
			0.365792	0.243346
			0.439777	0.323463
			0.37056	0.222182
			0.339495	0.211463
			0.364792	0.218276
			0.332092	0.18721
			0.447815	0.214143
			0.396857	0.221319
			0.293896	0.246616
			0.375874	0.198519
			0.408575	0.234081
			0.325733	0.223817
			0.36888	0.207785
			0.417795	0.213961
			0.407939	0.282178
			0.428922	0.25134
			0.409574	0.154147
			0.354301	0.190708
			0.305387	0.208193
			0.366655	0.19752
			0.447407	0.218458
			0.344037	0.237351
			0.387183	0.215778
			0.407939	0.275184
			0.405668	0.236943
			0.393133	0.230584
			0.475565	0.264693
			0.415751	0.243528
			0.372604	0.252157
			0.378145	0.233264
			0.460351	0.222182
			0.452948	0.249069
			0.429512	0.263285
			0.394768	0.28404
			0.529794	0.223999
			0.398674	0.276001
			0.408348	0.228132
			0.429331	0.259969
			0.444954	0.23717
			0.580343	0.241893
			0.366836	0.227723
			0.374239	0.217413
			0.45213	0.24539
			0.476156	0.263285
			0.436506	0.229539
			0.440594	0.252157
			0.421292	0.28236
			0.372786	0.252157
			0.404033	0.236943
			0.417386	0.21169
			0.386547	0.217231
			0.424789	0.185803
			0.37651	0.247252
			0.436098	0.253202
			0.415751	0.217004
			0.348351	0.238623
			0.392951	0.202017
			0.354119	0.213734
			0.39068	0.245799
			0.395631	0.222591
			0.380825	0.182896
			0.389636	0.220728
			0.369289	0.198928
			0.523208	0.227314
			0.440004	0.204287
			0.359433	0.214143
			0.362113	0.234717
			0.384095	0.221546
			0.413071	0.215596
			0.411436	0.213325
			0.369698	0.250931
			0.356754	0.194841
			0.36561	0.197702
			0.397856	0.227314
			0.413707	0.218049
			0.435871	0.232219
			0.390045	0.235943
			0.396221	0.18721
			0.382869	0.21169
			0.406713	0.171814
			0.493414	0.229948
			0.429739	0.24539
			0.374875	0.249886
			0.391725	0.211463
			0.440821	0.21437
			0.45481	0.244754
			0.457671	0.281361
			0.402807	0.210646
			0.40258	0.217413
			0.309292	0.244346
			0.433418	0.254201
			0.477382	0.263875
			0.496912	0.251158
			0.400127	0.277228
			0.462394	0.228132
			0.429739	0.271687
			0.476383	0.261604
			0.44123	0.232855
			0.482151	0.23944
			0.430738	0.261831
			0.481106	0.258334
			0.45213	0.27641
			0.534926	0.273322
			0.462621	0.258107
			0.38741	0.251976
			0.497547	0.246843
			0.557362	0.255064
			0.503906	0.232037
			0.535789	0.273958
			0.412254	0.234899
			0.464438	0.280316
			0.359842	0.215369
			0.464029	0.261831
			0.453175	0.251158
			0.42111	0.253792
			0.465483	0.208193
			0.481288	0.24044
			0.485603	0.256881
			0.491189	0.266328
			0.479244	0.266146
			0.359842	0.279499
			0.457671	0.244981
			0.452539	0.249296
			0.405486	0.266146
			0.501226	0.270461
			0.488691	0.233854
			0.508856	0.252975
			0.429103	0.242711
			0.5109	0.225861
			0.467754	0.29326
			0.58593	0.272913
			0.510491	0.295122
			0.482333	0.274139
			0.473067	0.257517
			0.405078	0.205287
			0.473067	0.28504
			0.465074	0.24807
			0.462803	0.293078
			0.521392	0.253202
			0.511945	0.277636
			0.510673	0.251749
			0.578527	0.292034
			0.502271	0.273322
			0.466119	0.280134
			0.486239	0.255246
			0.498138	0.255654
			0.400763	0.305387
			0.368698	0.293896
			0.530611	0.259787
			0.501635	0.266736
			0.526933	0.268598
			0.451313	0.270642
			0.386547	0.263466
			0.440004	0.281134
			0.494459	0.295713
			0.43033	0.267372
			0.511127	0.249886
			0.5228	0.309111
			0.504542	0.251976
			0.487465	0.311336
			0.500409	0.253384
			0.540694	0.263875
			0.523208	0.295713
			0.493823	0.273549
			0.445953	0.282769
			0.460351	0.272096
			0.452721	0.281951
			0.509038	0.347307
			0.488101	0.265737
			0.60069	0.275593
			0.501862	0.276229
			0.55282	0.295122
			0.484785	0.291398
			0.551776	0.311745
			0.466709	0.301889
			0.572986	0.301889
			0.535153	0.295304
			0.412481	0.287083
			0.516259	0.287492
			0.519938	0.290989
			0.518076	0.294078
			0.446589	0.347716
			0.456036	0.300481
			0.496503	0.311563
			0.493823	0.281542
			0.473476	0.299437
			0.506813	0.303343
			0.451085	0.312381
			0.485421	0.27582
			0.589427	0.283177
			0.570488	0.291216
			0.478245	0.269416
			0.481106	0.316923
			0.516441	0.300663
			0.500636	0.278454
			0.555682	0.297393
			0.495685	0.320601
			0.497139	0.310337
			0.586747	0.311745
			0.533927	0.326369
			0.481697	0.302525
			0.489327	0.286084
			0.449269	0.311155
			0.529794	0.29594
			0.527341	0.288355
			0.477609	0.297575
			0.520983	0.298211
			0.515442	0.285857
			0.516668	0.293078
			0.566991	0.31279
			0.555909	0.295713
			0.495095	0.366019
			0.533927	0.320193
			0.563312	0.332092
			0.538241	0.295713
			0.525297	0.289581
			0.457898	0.288945
			0.549959	0.329639
			0.558997	0.339495
			0.671587	0.270642
			0.515851	0.349351
			0.489917	0.27641
			0.540104	0.290172
			0.574802	0.28404
			0.525479	0.339904
			0.557362	0.300027
			0.508039	0.294713
			0.431965	0.322463
			0.55818	0.329866
			0.559996	0.283813
			0.573167	0.281361
			0.539649	0.302116
			0.624353	0.307249
			0.62517	0.317104
			0.534744	0.335998
			0.541103	0.333137
			0.495277	0.34281
			0.523662	0.264511
			0.491598	0.326778
			0.476565	0.306022
			0.579344	0.327777
			0.562494	0.295531
			0.539649	0.324916
			0.55055	0.33191
			0.4772	0.296576
			0.449859	0.313017
			0.593106	0.252793
			0.527977	0.312381
			0.560223	0.324916
			0.526115	0.286266
			0.502453	0.299028
			0.493233	0.319784
			0.522209	0.282996
			0.476792	0.318149
			0.530838	0.346308
			0.559406	0.297393
			0.603188	0.301708
			0.551776	0.323871
			0.570079	0.311155
			0.573576	0.31506
			0.456626	0.326551
			0.483786	0.313017
			0.483377	0.313834
			0.547279	0.285448
			0.473476	0.296757
			0.485194	0.312381
			0.511127	0.288764
			0.441639	0.274366
			0.501453	0.298619
			0.439368	0.27582
			0.436506	0.285448
			0.384322	0.275366
			0.500818	0.285675
			0.498365	0.274957
			0.505768	0.298392
			0.491189	0.254201
			0.421519	0.279272
			0.501453	0.301072
			0.399537	0.296121
			0.428059	0.270461
			0.526297	0.310519
			0.441457	0.320783
			0.505359	0.283586
			0.456218	0.306204
			0.524889	0.294078
			0.484604	0.276001
			0.517667	0.279726
			0.460759	0.280543
			0.487056	0.277636
			0.508856	0.295122
			0.461577	0.267372
			0.47988	0.271278
			0.435462	0.278863
			0.54133	0.277455
			0.400354	0.290989
			0.425606	0.316468
			0.46303	0.295122
			0.432192	0.265101
			0.416568	0.314243
			0.459942	0.29267
			0.459533	0.245163
			0.389863	0.294486
			0.511309	0.278681
			0.43528	0.296121
			0.394768	0.216187
			0.353892	0.265919
			0.378145	0.278272
			0.458897	0.266963
			0.48583	0.302707
			0.394177	0.266736
			0.395631	0.249296
			0.452312	0.280725
			0.463848	0.301708
			0.475747	0.270233
			0.464029	0.260196
			0.459942	0.244573
			0.452721	0.248887
			0.462394	0.272913
			0.36829	0.268826
			0.546644	0.250704
			0.496503	0.266146
			0.485421	0.296757
			0.459124	0.279499
			0.43796	0.270869
			0.37919	0.226497
			0.454583	0.219911
			0.428286	0.265737
			0.398492	0.287083
			0.461168	0.243119
			0.4554	0.280952
			0.436279	0.259152
			0.454583	0.272096
			0.367472	0.240258
			0.447815	0.265919
			0.433645	0.269825
			0.386547	0.263466
			0.481697	0.277636
			0.519757	0.294895
			0.373195	0.271505
			0.454401	0.265919
			0.525706	0.243937
			0.469389	0.272731
			0.428059	0.241257
			0.440004	0.267145
			0.413071	0.276637
			0.428513	0.209647
			0.474748	0.241893
			0.452721	0.263057
			0.464257	0.298211
			0.414297	0.244981
			0.437142	0.266963
			0.446362	0.276637
			0.411027	0.264511
			0.425425	0.241075
			0.464438	0.290399
			0.474339	0.251567
			0.428922	0.287083
			0.41021	0.282769
			0.413889	0.290989
			0.465256	0.278272
			0.49078	0.234081
			0.433827	0.266736
			0.412889	0.212099
			0.417795	0.24539
			0.427241	0.264693
			0.428922	0.252157
			0.435689	0.242938
			0.462394	0.26551
			0.422518	0.298211
			0.443274	0.245163
			0.342402	0.265919
			0.389636	0.235716
			0.427468	0.270869
			0.398265	0.257289
			0.522209	0.270233
			0.373013	0.25956
			0.397448	0.223408
			0.386366	0.255246
			0.367245	0.194205
			0.378963	0.230175
			0.380825	0.257698
			0.393133	0.255064
			0.369925	0.261014
			0.344218	0.258107
			0.34054	0.226905
			0.323281	0.243528
			0.407121	0.266146
			0.369925	0.250522
			0.47393	0.285267
			0.430738	0.243119
			0.44618	0.245572

## Sheet: Figure 7B..
			Ratio
			0.165854
			0.121189
			0.132519
			0.188387
			0.151748
			0.163152
			0.206358
			0.127463
			0.276772
			0.32975
			0.220637
			0.181386
			0.14729
			0.220847
			0.225608
			0.286667
			0.165228
			0.238672
			0.178691
			0.193444
			0.215444
			0.278529
			0.224369
			0.377131
			0.236467
			0.307048
			0.308958
			0.188621
			0.219094
			0.258716
			0.261148
			0.24867
			0.268747
			0.238167
			0.252374
			0.19834
			0.186626
			0.352894
			0.209319
			0.234697
			0.535809
			0.225985
			0.185091
			0.30605
			0.161299
			0.266545
			0.182314
			0.20677
			0.175984
			0.283536
			0.183719
			0.165141
			0.151994
			0.177788
			0.297525
			0.199785
			0.177423
			0.226525
			0.135202
			0.145381
			0.143394
			0.184815
			0.187295
			0.144028
			0.180372
			0.14677
			0.225937
			0.1865
			0.170016
			0.245592
			0.234028
			0.187488
			0.164665
			0.215388
			0.246381
			0.266602
			0.177327
			0.264321
			0.262009
			0.406079
			0.212667
			0.219979
			0.293003
			0.285178
			0.207
			0.341645
			0.314029
			0.235762
			0.232162
			0.345856
			0.198779
			0.200173
			0.285005
			0.266299
			0.260994
			0.238552
			0.18637
			0.289634
			0.244857
			0.274132
			0.231315
			0.22979
			0.219705
			0.195741
			0.306316
			0.226659
			0.241518
			0.331744
			0.150618
			0.236785
			0.227073
			0.317073
			0.173466
			0.186455
			0.167596
			0.299159
			0.228813
			0.286997
			0.24891
			0.250695
			0.216406
			0.228573
			0.170932
			0.22112
			0.374491
			0.168641
			0.200926
			0.210762
			0.250357
			0.173204
			0.451469
			0.204561
			0.152727
			0.191508
			0.262211
			0.26302
			0.203071
			0.170141
			0.195452
			0.268637
			0.246622
			0.364702
			0.216644
			0.248736
			0.220398
			0.303867
			0.374978
			0.343618
			0.383689
			0.238548
			0.190723
			0.154561
			0.17204
			0.288256
			0.19389
			0.421825
			0.242656
			0.207775
			0.234064
			0.221061
			0.234932
			0.280897
			0.506046
			0.26105
			0.28026
			0.294185
			0.287517
			0.285141
			0.259943
			0.267058
			0.284478
			0.262196
			0.329578
			0.218336
			0.224866
			0.277553
			0.241473
			0.218901
			0.253385
			0.32252
			0.258119
			0.241917
			0.282914
			0.290402
			0.216466
			0.254417
			0.369406
			0.196764
			0.322901
			0.255063
			0.311912
			0.375487
			0.293812
			0.248956
			0.172085
			0.249421
			0.385694
			0.206585
			0.308998
			0.291839
			0.26724
			0.279086
			0.259006
			0.277952
			0.325586
			0.227785
			0.296432
			0.212695
			0.356366
			0.386781
			0.214037
			0.235456
			0.234993
			0.306864
			0.221117
			0.158302
			0.274603
			0.229294
			0.362621
			0.338099
			0.215281
			0.241365
			0.413242
			0.264484
			0.316817
			0.32656
			0.344488
			0.359336
			0.345208
			0.400334
			0.358775
			0.305517
			0.458009
			0.393091
			0.307692
			0.321154
			0.413505
			0.390273
			0.452248
			0.351431
			0.503654
			0.548421
			0.429812
			0.435381
			0.423234
			0.416648
			0.417955
			0.454639
			0.344628
			0.26422
			0.27636
			0.373025
			0.412855
			0.270446
			0.304618
			0.314016
			0.349804
			0.335078
			0.246486
			0.319382
			0.420114
			0.388599
			0.390263
			0.355008
			0.288052
			0.468812
			0.524685
			0.487727
			0.35829
			0.449809
			0.493182
			0.420412
			0.404524
			0.41277
			0.595265
			0.439371
			0.406716
			0.463452
			0.464615
			0.583164
			0.493766
			0.537807
			0.483733
			0.458099
			0.659967
			0.554235
			0.435684
			0.410623
			0.37106
			0.445511
			0.560382
			0.482868
			0.435274
			0.457946
			0.370991
			0.444933
			0.459097
			0.548807
			0.443807
			0.527812
			0.772612
			0.541792
			0.48969
			0.583306
			0.586139
			0.598653
			0.523978
			0.653278
			0.609655
			0.539669
			0.451826
			0.588594
			0.612289
			0.562018
			0.552315
			0.587683
			0.67559
			0.537898
			0.556008
			0.574812
			0.615257
			0.506073
			0.732711
			0.622255
			0.65113
			0.665707
			0.61452
			0.661906
			0.667048
			0.527465
			0.800996
			0.711184
			0.723589
			0.783243
			0.583355
			0.711785
			0.681886
			0.753527
			0.693425
			0.831795
			0.601434
			0.668816
			0.6288
			0.770305
			0.737212
			0.585668
			0.571452
			0.915532
			0.759632
			0.598256
			0.842486
			0.747106
			0.73086
			0.728797
			0.721766
			0.736262
			0.712489
			0.963677
			0.88195
			0.55674
			0.831004
			0.858256
			0.755168
			0.864133
			0.696753
			0.760577
			0.673457
			0.934955
			0.747122
			0.665467
			0.816363
			0.851812
			0.760888
			0.753637
			0.676509
			0.806462
			0.857442
			0.633048
			0.656734
			0.619048
			0.826054
			0.754388
			0.783936
			0.641666
			0.650593
			0.721864
			1.00084
			0.631634
			0.729639
			0.573788
			0.655244
			0.700932
			0.665445
			0.678987
			0.71787
			0.64686
			0.7
			0.56543
			0.677146
			0.647754
			0.737072
			0.825848
			0.839631
			0.747076
			0.805558
			0.962139
			0.762236
			0.794814
			0.783687
			0.72975
			0.682424
			0.770642
			0.830772
			0.79396
			0.841546
			0.954068
			0.701324
			0.712107
			0.792402
			0.854391
			0.967748
			0.751701
			1.00629
			0.817046
			1.19849
			0.855145
			0.794165
			0.763594
			0.681634
			0.720528
			0.880701
			0.720874
			0.869071
			0.836854
			0.911972
			0.967658
			0.683162
			0.736465
			0.874338
			0.725582
			0.769986
			0.845018
			0.90223
			1.02655
			0.843116
			0.990127
			0.826703
			0.992993
			0.935857
			0.955456
			0.915955
			1.11286
			0.956095
			0.861782
			0.903907
			1.02669
			1.04448
			1.15688
			0.963833
			1.13235
			1.15268
			0.917417
			0.882302
			1.09465
			1.10494
			1.10224
			1.02607
			0.933504
			0.950642
			1.13784
			1.04167
			1.02687
			1.11227
			1.34529
			1.14659
			1.0386
			1.09769
			1.15502
			1.08427
			1.30905
			1.24241
			1.17156
			1.06296
			1.11377
			1.20321
			1.26195
			1.20986
			1.14261
			1.21461
			1.18954
			1.14448
			1.14034
			1.23087
			1.18125
			1.37087
			1.08965
			1.27199
			1.26998
			1.18821
			1.22824
			1.10678
			1.54996
			1.40536
			1.48202
			1.49844
			1.26571
			1.08519
			1.12051
			1.05892
			1.19176
			1.30314
			1.40292
			1.17615
			1.21903
			1.30055
			1.09802
			1.19505
			1.41315
			1.19417
			1.11369
			1.22418
			1.22833
			1.0493
			1.18217
			1.07676
			1.26012
			1.20627
			1.1859
			1.18817
			1.1948
			0.927121
			1.50827
			1.16178
			1.03085
			1.12785
			1.22887
			1.26612
			1.27694
			1.2484
			1.18849
			1.61905
			1.1926
			1.16845
			1.27567
			1.13832
			1.49044
			1.27078
			1.09781
			1.07673
			1.24001
			1.09927
			1.2714
			1.18831
			1.30121
			1.05326
			1.16073
			1.13122
			1.27663
			1.29045
			1.16195
			1.18623
			1.20742
			1.31255
			1.38859
			1.0743
			1.33424
			1.25707
			1.28012
			1.24702
			1.34159
			1.09345
			1.24615
			1.44148
			1.40727
			1.18271
			1.0761
			1.25232
			1.28514
			1.21639
			1.33689
			1.38373
			1.23903
			1.14617
			1.38569
			1.32387
			1.32793
			1.26617
			1.05185
			1.16724
			1.19612
			1.29541
			1.33426
			1.22707
			1.07577
			1.20549
			1.20429
			1.17481
			1.35644
			1.28406
			1.21827
			1.32079
			1.41594
			0.931789
			1.25014
			1.30652
			1.24846
			1.2683
			1.38539
			1.2731
			1.18474
			1.40439
			1.18109
			1.31761
			1.2561
			1.50631
			1.26178
			1.16994
			1.33327
			1.32073
			1.22583
			1.18325
			1.33207
			1.27372
			1.30578
			1.32935
			1.29478
			1.55038
			1.47142
			1.55659
			1.35335
			1.35946
			1.27436
			1.31186
			2.00892
			1.42032
			1.39869
			1.2911
			1.30904
			1.42802
			1.18607
			1.35275
			1.14515
			1.49041
			1.43135
			1.69712
			1.36647
			1.35116
			1.47793
			1.45044
			1.22557
			1.51425
			1.43901
			1.34392
			1.50891
			1.4101
			1.5143
			1.37447
			2.31704
			1.32815
			1.28609
			1.33852
			1.25274
			1.31179
			1.42245
			1.19443
			1.52606
			1.39016
			1.25281
			1.26029
			1.57476
			1.47172
			1.64533
			1.55404
			1.21314
			1.46948
			1.23688
			1.23595
			1.34448
			1.58307
			1.14956
			1.67283
			1.37805
			1.40759
			1.3053
			1.29368
			1.19871
			1.5827
			1.18239
			1.4994
			1.26955
			1.3845
			1.37997
			1.21877
			1.3158
			1.29942
			1.18777
			1.26724
			1.14983
			1.15537
			2.77806
			1.58988
			1.5732
			1.47481
			1.47868
			1.50955
			1.46927
			1.1641
			1.33665
			1.29449
			1.39387
			1.28042
			1.28211
			1.31369
			1.71778
			1.27773
			1.42738
			1.37449
			1.45547
			1.27233
			1.28215
			1.39858
			1.42249
			1.768
			1.41785
			1.34396
			1.33382
			1.53269
			1.21595
			1.85566
			1.2738
			1.24506
			1.65508
			1.58624
			1.25663
			1.41626
			1.34111
			1.34549
			1.29402
			1.64455
			1.58455
			2.81009
			1.35358
			1.38495
			1.31603
			1.63852
			1.38448
			1.42391
			1.41929
			1.4309
			1.57532
			1.40912
			1.29374
			1.28544
			1.6187
			1.43681
			1.37073
			1.43757
			2.02734
			1.49761
			1.5188
			1.55746
			1.28519
			1.34451
			1.36315
			1.40251
			1.34006
			1.26424
			1.43782
			1.39012
			1.43736
			1.47669
			1.70625
			1.51928
			1.13013
			1.5626
			1.49741
			1.29928
			1.49643
			1.6164
			1.31527
			1.48248
			1.94299
			1.53213
			1.29913
			1.53823
			1.68306
			1.30131
			1.5155
			1.33874
			1.47708
			1.46803
			1.55287
			1.47806
			1.32652
			1.41396
			1.70276
			1.55736
			1.43743
			1.27629
			1.89749
			1.31236
			1.52259
			1.4496
			1.58714
			1.94377
			1.40388
			1.46935
			1.57093
			1.56018
			1.59772
			1.51083
			1.34813
			1.32701
			1.47245
			1.62633
			1.507
			1.78997
			1.35513
			1.49441
			1.59554
			1.30879
			1.59903
			1.42482
			1.39965
			1.50997
			1.6606
			1.50054
			1.53971
			1.86007
			1.73429
			1.43912
			1.3625
			1.48053
			1.59423
			1.60025
			1.32304
			1.51968
			1.53402
			1.49571
			1.58445
			1.58363
			1.43696
			1.68769
			1.52123
			1.8141
			1.75999
			1.50909
			1.34093
			1.54927
			1.68395
			1.5811
			1.4429
			1.58699
			1.55417
			1.17987
			1.48316
			1.56098
			1.66803
			1.31197
			1.67931
			1.40692
			1.56771
			1.59608
			1.68146
			1.44619
			1.59397
			1.44697
			1.6707
			1.54562
			1.36733
			1.68957
			1.8131
			1.77953
			1.67019
			1.50439
			1.46374
			1.43504
			1.53413
			1.54914
			1.45158
			1.79187
			1.67434
			1.61221
			1.58703
			1.55658
			1.20277
			1.58802
			1.55528
			1.36394
			1.59601
			1.72691
			1.69214
			1.51858
			1.83203
			1.42561
			1.80336
			1.52294
			1.53265
			1.57597
			1.62045
			1.46801
			1.59487
			1.41416
			1.72498
			1.59415
			1.7027
			1.70089
			1.58698
			1.46864
			1.621
			1.65118
			1.22595
			1.18217
			1.7193
			1.61258
			1.67044
			1.46641
			1.32374
			1.39932
			1.48188
			1.42426
			1.71259
			1.50181
			1.68502
			1.41146
			1.66744
			1.72733
			1.55159
			1.56441
			1.40848
			1.48417
			1.42834
			1.34854
			1.5814
			1.82866
			1.5742
			1.62572
			1.47385
			1.56021
			1.39373
			1.64761
			1.58212
			1.31054
			1.56595
			1.56155
			1.54527
			1.21289
			1.37285
			1.43181
			1.53301
			1.4182
			1.48438
			1.32324
			1.53396
			1.76581
			1.68459
			1.54081
			1.37861
			1.51697
			1.56223
			1.62371
			1.40035
			1.43741
			1.64183
			1.46843
			1.42736
			1.50457
			1.32279
			1.5667
			1.58998
			1.43455
			1.53689
			1.57028
			1.54561
			1.59184
			1.63088
			1.26738
			1.48919
			1.51518
			1.58804
			1.58015
			1.41648
			1.49359
			1.48114
			2.03506
			1.35724
			1.54309
			1.61424
			1.72552
			1.4064
			1.61748
			1.51849
			1.24933
			1.51124
			1.68953
			1.73303
			1.56712
			1.74794
			1.71011
			1.43901
			1.46229
			1.33178
			1.67977
			1.37163
			1.40342
			1.56595
			1.64757
			1.48622
			1.48735
			1.43703
			1.31843
			1.92097
			1.50243
			1.5328
			1.59518
			1.48929
			1.39736
			1.59845
			1.3648
			1.39853
			1.63271
			1.7205
			1.51727
			1.60514
			1.59872
			1.29344
			1.39738
			1.39378
			1.65105
			1.42739
			1.40273
			1.54839
			1.42771
			1.48835
			1.41664
			1.37561
			1.27789
			1.53465
			1.57038
			1.49956
			1.63891
			1.35922
			1.47962
			1.25049
			1.40704
			1.50505
			1.27582
			1.55401
			1.3547
			1.56186
			1.53117
			1.60018
			1.45364
			1.53104
			1.51897
			1.50562
			1.53763
			1.39587
			1.66943
			1.26824
			1.25194
			1.4077
			1.43761
			1.23743
			1.40859
			1.59237
			1.23194
			1.58833
			1.33707
			1.53643
			1.22991
			1.25285
			1.50024
			1.4366
			1.33235
			1.3998
			1.43172
			1.3875
			1.5311
			1.54079
			1.5961
			1.55752
			1.4863
			1.25798
			1.80544
			1.60166
			1.45628
			1.45335
			1.4311
			1.44489
			1.69711
			1.42501
			1.2759
			1.60596
			1.43867
			1.47124
			1.46934
			1.35636
			1.47537
			1.4238
			1.32374
			1.51745
			1.54629
			1.26193
			1.49258
			1.78126
			1.50496
			1.52182
			1.45031
			1.34684
			1.67061
			1.64932
			1.4994
			1.40017
			1.46811
			1.44354
			1.43147
			1.38432
			1.51523
			1.42749
			1.60488
			1.35125
			1.31901
			1.30144
			1.47338
			1.73175
			1.43575
			1.61064
			1.47611
			1.42617
			1.47919
			1.53593
			1.51509
			1.29958
			1.54744
			1.19988
			1.43673
			1.40403
			1.37693
			1.65117
			1.30151
			1.51168
			1.3525
			1.55653
			1.42891
			1.32885
			1.37137
			1.28832
			1.22974
			1.33069
			1.22138
			1.36821
			1.32513
			1.46932
			1.52139
			1.55372

## Sheet: Figure 7C
			eater-dsRed	dome-MESO-GFP
			31.503	41.401
			37.107	42.802
			36.102	44.525
			32.785	42.045
			31.475	43.525
			34.023	42.424
			35.559	42.633
			35.814	42.017
			33.836	43.571
			31.938	43.339
			36.808	42.893
			32	41.011
			34.328	42.299
			34.921	43.836
			35.407	43.192
			36.243	44.525
			32.254	39.424
			34.48	42.305
			33.09	37.994
			34.655	43.548
			35.13	44.989
			32.463	39.395
			39.379	43.797
			34.825	42.819
			31.729	41.192
			32.989	41.605
			35.395	44.254
			37.051	44.949
			37.983	42.797
			35.847	45.373
			33.751	40.593
			38.864	43.181
			32.119	40.734
			35.299	40.983
			34.751	39.797
			34.983	43.475
			34.763	43.141
			36.797	43.525
			33.695	42.395
			36.395	43.119
			32.644	41.554
			36.107	43.169
			34.226	40.266
			34.198	40.757
			33.333	42.588
			36.085	43.282
			38.232	43.424
			36.006	44.034
			35.672	42.757
			34.333	43.356
			36.153	43.254
			32.435	39.621
			34.785	43.056
			37.48	40.463
			36.825	42.881
			35.006	42.729
			35.859	40.989
			34.232	39.701
			36.847	40.452
			35.633	41.689
			38.254	42.412
			33.706	41.537
			36.124	43.181
			34.881	41.441
			35.277	41.588
			34.469	42.254
			29.429	37.972
			33.458	39.141
			35.695	42.508
			39.525	43.588
			36.78	44.068
			38.435	42.881
			34.164	39.633
			35.582	42.853
			36.48	43.893
			41.508	43.056
			34.379	41.554
			36.876	40.644
			33.842	39.305
			35.305	43.141
			34.226	40.52
			35.542	43.322
			34.508	41.52
			36.282	40.017
			38.198	43.175
			36.175	41.921
			35.932	44.243
			33.542	41.65
			35.056	43.192
			34.492	41.972
			33.921	42.04
			34.062	43.424
			34.819	42.576
			36.972	42.876
			33.621	41.921
			39.282	44.452
			35.311	42.893
			28.023	39.282
			33.599	39.113
			34.339	41.136
			37.215	44.401
			40.48	43.994
			32.972	43.215
			35.768	45.74
			35.418	43.48
			38.209	42.198
			38.339	44.492
			37.164	44.576
			38.429	45.373
			34.876	44.147
			36.407	44.395
			38.723	42.938
			36.186	43.192
			42.243	43.887
			36.333	40.61
			39.921	42.847
			40.26	44.339
			38.35	42.446
			37.09	43.141
			39.39	42.831
			35.345	41.198
			34.39	44.316
			39.542	43.356
			36.65	43.831
			35.52	44.486
			35.107	43.983
			33.554	39.814
			38.836	42.576
			35.429	41.831
			32.198	39.299
			39.147	41.944
			33.96	37.52
			34.537	44
			37.141	42.847
			40.831	44.441
			36.808	41.915
			38.424	42.52
			39.904	43.04
			38.045	43.175
			32.718	37.667
			35.712	40.571
			34.684	40.418
			38.102	39.955
			36.492	42.621
			35.689	41.864
			33.842	39.638
			34.458	39.836
			38.463	41.345
			35.96	40.599
			35.113	42.706
			36.582	43.898
			34.814	40.429
			37.554	41.475
			37.136	43.424
			36.65	43.763
			34.836	41.017
			31.768	38.661
			37.277	43.712
			33.175	38.729
			34.435	42.345
			34.277	41.938
			36.09	42.305
			34.497	37.537
			33.384	35.927
			34.373	38.949
			37.927	43.469
			35.774	38.904
			31.26	39.226
			35.847	41.751
			36.61	41.017
			34.209	39.164
			39.706	44.576
			38.497	42.836
			39.232	43.362
			35.249	41.689
			35.424	41.757
			38.814	40.791
			33.593	41.305
			34.893	41.401
			30.537	37.876
			35.605	40.192
			38.028	42.237
			31.271	36.424
			34.181	41.006
			38.893	41.463
			34.09	41.203
			35.113	42.48
			33.243	43.367
			33.695	38.565
			35.638	42.102
			35.023	43.638
			33.237	43.215
			34.497	41.073
			36.045	41.808
			35.831	42.91
			37.198	42.26
			35.056	44.006
			39.243	43.181
			37.785	42.051
			35.955	40.39
			36.802	43.316
			38.791	42.113
			36.051	38.938
			36.446	43.011
			35.209	43.746
			37.542	43.593
			33.537	41.452
			31.271	35.192
			37.847	42.068
			35.237	40.09
			37.921	43.175
			37.989	42.842
			35.056	43.825
			33.774	41.333
			31.966	41.311
			34.299	42.915
			34.819	42.384
			33.316	41.068
			33.932	42.186
			36.328	42.91
			33.452	39.407
			34.718	42.689
			29.859	39.576
			38.203	41.78
			35.373	41.051
			36.881	42.904
			35.712	40.989
			34.52	40.418
			36.921	40.277
			33.164	39.972
			34.836	39.797
			40.339	41.96
			36.401	41.814
			36.571	43.017
			33.52	37.853
			35.299	39.684
			31.254	39.345
			34.91	39.718
			35.802	40.362
			40.508	43.345
			35.254	40.153
			37.395	40.989
			38.045	43.723
			31.819	39.791
			36.09	41.932
			35.373	42.429
			38.198	42.819
			34.734	41.712
			36.062	41.864
			36.706	42.198
			34.989	41.78
			35.718	40.819
			36.565	41.966
			29.469	40.435
			36.797	42.531
			36.311	42.164
			34.864	41.644
			33.78	36.746
			34.429	40.073
			36.74	40.893
			34.153	40.661
			34.667	39.531
			36.028	40.672
			33.836	39.791
			32.904	37.842
			34.395	39.492
			36.384	41.316
			35.576	40.706
			36.429	38.91
			33.932	40.571
			36.034	39.441
			38.503	41.859
			31.198	41.322
			37.056	38.588
			32.141	38.548
			36.588	40.864
			34.955	38.621
			33.136	38.559
			37.237	40.147
			35.333	40.073
			33.435	39.593
			36.401	40.113
			35.672	39.497
			35.056	40.621
			34.927	38.723
			33.667	39.203
			37.147	41.096
			34.141	38.684
			34.243	38.113
			35.282	39.525
			34.559	39.299
			32.966	40.633
			34.616	39.932
			33.774	37.802
			33.198	39.559
			29.599	34.051
			32.831	39.232
			34.062	39.616
			33.927	39.198
			34.339	37.446
			35.616	40.887
			32.232	36.311
			37.994	41.215
			38.588	38.616
			34.271	39.831
			33.621	40.853
			37.599	39.684
			37.949	39.757
			39.22	40.684
			35.672	38.458
			34.65	39.463
			38.91	40.119
			35.243	39.407
			41.621	42.576
			34.621	40.644
			38.514	41.593
			39.718	40.345
			36.034	40.424
			36.966	41.136
			35.881	40.814
			39.164	43.678
			32.797	37.887
			36.277	35.627
			32.356	38.949
			35.904	41.429
			36.441	38.768
			36.271	40.068
			38.141	41.141
			34.418	38.887
			35.61	42.141
			34.04	38.395
			38.61	40.073
			33.316	37.542
			37.153	38.503
			35.836	39.932
			34.073	40.384
			37.085	40.497
			38.831	41.881
			32.859	39.802
			40.881	41.684
			38.073	40.418
			29.175	32.271
			32.056	35.062
			36.215	39.847
			34.887	41.435
			37.508	41.418
			32.39	37.746
			39.051	40.802
			35.119	38.831
			38.977	39.198
			32.469	37.831
			41.35	42.548
			33.22	36.542
			32.339	36.52
			32.898	35.915
			34.085	38.401
			37.339	39.588
			33.356	39.13
			37.955	39.492
			38.203	41.011
			35.944	38.525
			36.944	36.893
			32.316	38.401
			35.463	39.915
			31.294	36.927
			35.254	36.881
			36.452	38.751
			33.729	39.045
			38.678	41.475
			37.147	38.542
			37.78	40.017
			35.09	38.655
			33.056	37.429
			37.859	36.062
			35.079	38.203
			36.006	39.068
			36.452	39.966
			33.831	36.898
			35.706	37.045
			32.847	37.638
			37.616	38.034
			36.859	39.565
			32.605	37.311
			36.497	39.22
			36.994	38.627
			32.994	34.424
			32.028	35.023
			34.023	39.39
			36.062	38.684
			34.023	38.299
			38.147	40.277
			35.565	39.537
			34.158	37.96
			32.853	34.989
			32.169	38.362
			34.096	40.537
			37.593	37.305
			35.475	38.469
			34.073	37.876
			31.158	37.356
			36.695	37.989
			35.243	39.288
			31.446	36.181
			31.944	37.395
			33.559	35.401
			32.085	36.734
			34.463	36.249
			31.345	37.13
			38.972	38.836
			31.684	33.842
			34.881	38.181
			30.729	35.26
			30.503	33.407
			29.751	34.492
			27.91	31.757
			31.203	34.22
			33.458	37.593
			32.051	35.644
			32.113	33.695
			35.548	37.26
			32	36
			31.621	34.932
			31.288	33.96
			32.458	34.638
			30.062	35.017
			29.548	33.079
			31.203	32.847
			27.452	32.26
			30.373	34.418
			31.017	32.203
			29.277	31.458
			30.52	29.655
			30.565	30.073
			29.051	33.282
			28.407	29.887
			31.345	34.401
			30.768	32.017
			28.147	27.588
			32.068	33.305
			26.113	31.525
			27.107	30.271
			28.418	30.294
			24.593	30.593
			30.243	29.768
			19.718	23.701
			27.836	29.266
			25.87	28.785
			27.571	28.876
			24.356	27.616
			30.028	31.435
			29.124	32.463
			25.927	30.322
			24.458	28.209
			26.78	29.514
			25.87	29.362
			29.65	30.893
			29.616	31.627
			27	31.356
			30.763	32.751
			26.893	31.627
			29.181	31.492
			30.949	32.768
			29.373	33.345
			29.169	32.017
			30.819	31.169
			27.305	30.39
			28.446	30.469
			32.723	32.469
			33.068	33.757
			29.452	34.249
			31.407	32.429
			32.006	35.203
			30.983	31.932
			26.079	32.288
			29.136	32.356
			34.384	33.949
			34.955	34.814
			30.554	35.192
			32.893	34.938
			36.548	35.299
			37.48	35.605
			31.599	33.706
			30.718	33.249
			32.452	33.977
			27.667	31.458
			31.927	33.915
			33.011	34.655
			32.232	37.356
			35.605	36.537
			34.814	33.232
			35.712	34.701
			34.266	35.469
			32.113	37.537
			34.367	36.983
			35.384	35.469
			35.661	34.853
			34.768	35.881
			30.983	34.056
			29.356	29.842
			32.808	34.475
			33.153	31.254
			35.333	32.65
			29.384	31.729
			31.492	33.565
			35.164	34.333
			33.678	34.605
			31.633	33.102
			33.441	32.859
			36.232	34.723
			32.508	34.537
			32.565	34.921
			33.893	35.373
			32.774	33.825
			35.768	35.542
			35.237	33.853
			31.073	34.859
			31.825	33.667
			38.362	36.322
			35.186	36.825
			34.571	36.311
			36.249	33.486
			37.661	34.593
			36.859	36.045
			32.644	36.401
			32.723	35.294
			35.661	36.379
			36.825	34.994
			35.571	33.503
			34.215	33.994
			32.989	36.328
			31.593	32.842
			30.328	31.599
			32.825	35.435
			32.169	33.746
			36.011	34.915
			33.774	35.379
			30.339	33.746
			29.266	32.068
			36.226	35.87
			34.124	35.531
			38.254	36.548
			35.898	36.158
			33.237	34.09
			31.977	34.627
			34.153	36.186
			32.26	34.322
			32.153	35.028
			31.74	34.621
			37.073	37.751
			36.898	35.333
			36.757	35.802
			35.395	33.13
			35.836	34.412
			33.096	35.525
			35.621	36.412
			30.362	34.271
			34.819	35.729
			35.61	35.819
			34.508	35.232
			29.729	34.028
			32.91	31.768
			33.774	36.825
			34.514	36.045
			29.345	32.164
			34.175	35.107
			32.136	33.311
			36.463	32.277
			35.39	35.068
			31.938	33.175
			35.616	33.706
			32.955	33.452
			33.271	31.723
			30.017	30.158
			33.056	32.418
			34.158	35.333
			33.763	33.898
			35.492	35.458
			37.554	35.26
			28.616	29.955
			36.062	35.028
			36.141	35.09
			35.367	35.011
			34.757	34.209
			31.316	33.503
			33.085	34.96
			36.333	37.446
			35.373	35.367
			34.559	36.627
			36.271	36.819
			34.955	36.379
			30.311	33.356
			39.554	37.113
			34.373	36.192
			36.48	37.712
			32.322	33.203
			33.701	35.757
			33.593	37.356
			32.78	36.847
			35.04	37.232
			35.011	36.571
			31.565	34.582
			35.729	35.266
			30.559	33.763
			33.797	34.723
			34.554	34.689
			35.61	35.503
			30.989	33.39
			33.706	33.48
			30.559	30.972
			32.362	33.203
			33.576	37.322
			36.944	38.045
			33.864	35.994
			34.814	36.215
			35.644	33.734
			34.277	36.898
			32.638	37.22
			38.401	37.073
			34.559	38.35
			36.011	38.621
			37.814	38.305
			37.508	37.362
			38.373	35.497
			36.757	38.949
			35.672	39.249
			36.723	36.802
			39.588	37.61
			38.695	38.017
			36.859	38.26
			36.04	37.277
			38.011	37.983
			38.04	39.096
			34.158	34.853
			32.927	37.345
			34.475	38.401
			37.469	37.181
			33.04	35.667
			31.294	36.141
			36.531	36.763
			32.723	32.305
			33.424	36.667
			36.164	35.898
			34.949	31.91
			36.684	37.243
			32.87	33.13
			31.215	34.424
			37.791	38.977
			36.429	37.266
			32.158	34.825
			34.277	34.825
			37.339	35.463
			37.113	34.548
			34.13	38.147
			36.814	37.39
			31.537	34.062
			38.881	36.667
			33.91	35.949
			35.785	36.701
			35.938	31.435
			36.582	35.249
			32.22	32.045
			33.576	34.017
			33.475	32.124
			32.458	35.124
			37.39	36.441
			29.768	28.605
			34.554	35.616
			33.102	31.983
			36.836	33.458
			33.819	33.706
			32.525	30.791
			32.904	34.192
			29.379	31.203
			30.836	32.802
			31.175	30.774
			32.243	31.412
			26.294	28.141
			30.215	28.429
			31.718	29.412
			30.034	29.339
			30.791	30.695
			27.582	28.316
			27.599	29.299
			28.678	29.593
			31.328	30.356
			31.689	29.757
			28.655	28.271
			33.514	30.689
			26.944	27.463
			28.667	30.181
			30.74	29.706
			34.554	32.864
			29.74	31.525
			24.299	25.977
			28.621	30.763
			28.136	31.554
			29.514	30.78
			31.751	31.904
			26.678	29.379
			31.921	32.373
			29.333	30.87
			28.073	34.768
			32.04	31.311
			27.695	27.48
			32.153	31.525
			33.249	31.102
			37.186	35.107
			32.684	33.056
			38.294	33.271
			33.734	33.085
			25.215	26.701
			34.87	33.441
			33.051	33.842
			32.588	31.305
			30.305	29.644
			27.316	30.576
			31.757	32.768
			29.695	29.215
			36.266	34.215
			34.734	34.017
			31.328	28.469
			31.102	32.847
			36.345	29.305
			29.316	27.215
			32.91	31.147
			27.006	26.412
			30.638	29.78
			33.734	32.548
			32.808	32.243
			32.825	30.881
			32.475	31.819
			28.768	28.938
			30.339	32.085
			34.079	30.469
			31.695	31.701
			30.938	32.418
			31.203	30.068
			30.966	31.876
			26.441	25.932
			29.192	29.797
			30.616	29.107
			29.424	30.695
			30.158	28.362
			27.062	26.169
			29.836	28.729
			24.977	27.599
			30.158	28.446
			23.893	28.395
			25.525	26.328
			27.542	30.345
			26.983	28.107
			29.768	29.373
			26.373	29.068
			31.328	29.74
			28.452	30.362
			33.469	31.35
			30.695	29.497
			29.638	28.452
			30.876	29.712
			28.39	27.395
			27.006	27.514
			32.842	29.226
			28.395	26.356
			27.243	25.119
			27.113	26.514
			31.853	28.102
			28.593	29.282
			28.452	28.887
			28.209	30.079
			30.678	31.661
			28.994	31.079
			28.446	30.893
			32.056	30.599
			32.04	32.113
			30.65	31.169
			30.571	30.87
			29.017	28.028
			26.763	30.282
			27.39	27.548
			25.35	24.407
			24.667	22.994
			24.701	25.237
			22.994	23.91
			30.119	29.458
			30.508	28.52
			29.695	28.605
			29.475	28.864
			28.271	26.056
			31.384	28.531
			27.763	26.797
			28.085	25.751
			32.469	29.91
			31.831	29.412
			29.492	25.768
			28.04	27.475
			32.469	30.723
			29.475	27.395
			27.881	26.706
			29.458	28.554
			29.791	27.876
			30.452	26.802
			28.537	28.407
			29.458	28.249
			25.955	28.972
			27.655	28.102
			26.073	27.667
			31.52	25.915
			29.706	26.751
			27.339	26.412
			29.74	29.215
			36.203	30.492
			30.966	29.729
			31.836	29.124
			29.085	28.819
			29.124	28.599
			27.605	30.384
			27.548	27.169
			31.186	30.017
			33.729	29.085
			31.429	30.627
			32.48	30.328
			33.785	33.232
			32.723	31.395
			27.853	29.672
			30.831	28.994
			35.695	32.418
			31.282	30.367
			29.576	27.898
			31.463	29.119
			28.949	28.311
			26.802	28.034
			30.068	30.379
			33.322	28.757
			34.734	30.78
			29.198	27.74
			26.983	27.441
			32.006	30.282
			33.333	31.927
			35.441	32.35
			31.864	31.017
			31.802	30.181
			33.831	29.379
			29.452	31.35
			32.175	29.203
			33.977	32.006
			29.644	26.921
			35.305	33.034
			33.158	31.593
			31.514	31.113
			30.785	30.751
			32.763	31.74
			33.508	32.819
			34.972	32.802
			34.034	30.808
			33.277	33.441
			34.056	30.565
			33.085	33.068
			33.328	31.904
			30.983	30.412
			30.379	29.633
			31.407	28.672
			31.96	30.079
			30.638	30.723
			33.61	29.887
			32.695	27.249
			34.876	30.91
			33.588	30.757
			30.983	29.689
			33.345	31.65
			29.203	28.576
			35.898	33.712
			31.508	28.655
			33.78	31.215
			34.203	33.277
			35.412	35.085
			36.689	31.87
			28.706	30.282
			34.096	33.842
			33.209	33.26
			33.588	32.339
			40.395	33.096
			32.294	30.153
			32.723	33.52
			35.006	32.621
			31.989	30.305
			35.237	33.78
			36.723	32.74
			32.034	34.362
			32.842	33.141
			37.819	34.576
			35.87	33.944
			30.339	31.198
			34.91	34.028
			33.418	30.893
			32.333	32.006
			37.859	35.537
			33	33.785
			34.266	31.102
			32.429	31.045
			37.65	35.379
			32.26	34.864
			35.678	33.831
			34.977	34.051
			36.876	31.932
			32.141	33.311
			32.102	31.508
			30.458	31.723
			33.107	31.96
			33.475	32.734
			34.379	34.588
			34.124	30.893
			37.621	34.48
			34.797	32.915
			37.085	35.017
			35.61	34.876
			37.164	34.305
			36.124	33.48
			32.729	32.169
			34.034	33.977
			31.593	32.458
			35.514	29.904
			34.797	33.266
			35.621	33.124
			35.424	32.056
			32.593	32.333
			36.61	32.13
			36.904	32.955
			35.073	31.446
			35.475	32.401
			32.559	30.525
			37.734	34.22
			32.949	33.068
			34.096	32.469
			35.65	34.864
			31.339	32.328
			38.169	34.412
			31.26	32.373
			32.881	30.65
			31.373	31.401
			34.136	34.627
			34.48	33.192
			35.198	33.989
			34.678	35.718
			34.718	33.339
			31.734	31.893
			34.819	32.181
			32.802	34.548
			32.746	32.373
			34.525	30.102
			33.949	34.644
			32.966	32.938
			32.864	32.712
			37.186	35.582
			28.87	30.819
			30.616	29.65
			35.034	30.243
			34.706	31.814
			26.853	28.26
			32.379	31.164
			33.328	32.542
			37.056	32.441
			37.514	31.802
			31.723	29.751
			34.243	31.757
			34.26	33.367
			32.859	31.175
			34.294	32.463
			36.028	31.537
			32.802	33.045
			37.006	33.621
			34.949	33.282
			35.706	30.977
			33.61	33.209
			34.859	29.186
			31.537	31.429
			32.39	33.593
			32.751	32.729
			33.605	32.124
			33.593	29.13
			31.147	30.13
			34.362	30.282
			32.107	29.712
			33.972	30.147
			33.65	30.655
			35.458	30.486
			31.525	31.548
			36.486	32.463
			30.102	29.757
			30.757	30.548
			24.887	25.893
			31.802	30.983
			33.944	31.475
			33.085	33.079
			38.508	31.887
			35.684	34
			31.74	31.689
			32.48	33.701
			33.52	32.927
			35.797	33.35
			35.113	34.017
			34.198	31.599
			33.141	31.475
			29.672	27.706
			32.299	32.215
			36.311	32.136
			36.215	30.723
			30.215	31.571
			33.034	29.017
			31.627	31.921
			32.61	29.215
			32.503	29.452
			29.91	29.797
			33.469	33.04
			35.322	32.147
			29.311	31.678
			33.638	32.085
			38.339	32.831
			31.638	29.571
			33.831	28.689
			32.712	31.085
			27.695	26.718
			34.458	30.311
			30.153	28.774
			31.102	30.119
			30.565	29.542
			31.26	30.554
			38.271	31.056
			29.469	29.271
			29.186	29.051
			30.582	29.102
			28.147	24.819
			35.254	30.525
			33.26	28.169
			31.751	30.181
			37.243	31.576
			31.113	27.887
			33.362	29.011
			36.836	30.842
			35.712	30.232
			28.571	27.689
			33.994	32.203
			31.232	29.107
			33.78	30.073
			31.09	28.768
			29.554	28.22
			27.537	28.91
			28.605	28.746
			28.316	28.927
			29.966	26.22
			28.062	27.994
			33.921	30.412
			36.915	31.407
			34.638	31.254
			34.593	31.316
			28.254	27.514
			34.056	30.26
			29.571	27.169
			30.418	26.22
			34.983	30.718
			35.192	29.621
			33.52	30.61
			38.52	32.226
			31.028	28.876
			34.237	32.808
			28.508	26.774
			34.559	32
			31.356	31.277
			26.768	28.836
			36.661	30.898
			31.718	29.215
			34.638	30.814
			32.983	30.384
			33.243	31.785
			34.514	30.785
			33.418	31.277
			31.825	27.955
			29.955	26.045
			27.621	26.079
			31.876	29.198
			30.757	29.311
			33.073	28.989
			34.734	29.571
			29.203	25.226
			33.949	29.927
			37.299	31.881
			33.147	29.61
			32.853	29.215
			31.876	29.034
			32.836	31.085
			32.305	27.237
			26.011	26.723
			33.35	31.441
			31.463	27.09
			31.062	26.814
			30.91	26.644
			32.254	27.356
			33.621	30.966
			29.977	25.282
			31.192	28.616
			31.61	28.898
			32.356	26.542
			33.429	32.006
			30.48	25.966
			34.203	29.554
			34.429	30.492
			30.107	29.226
			32.853	29.915
			30.898	29.667
			31.463	28.294
			31.554	29.04
			32.966	29.226
			34.266	29.35
			29.333	27.322
			29.22	30
			32.876	28.305
			31.441	31.056
			29.198	31.684
			31.972	27.192
			29.503	28.542
			32.186	30.22
			34.045	30.842
			32.424	28
			32.401	32.062
			31.751	27.458
			33.774	31.605
			33.514	29.492
			33.525	31.316
			33.085	30.034
			29.763	27.492
			33.876	32.684
			31.678	29.215
			32.582	30.864
			33.294	30.424
			34.429	32.169
			34.435	30.734
			31.661	30.011
			32.718	29.542
			33.514	27.537
			36.062	30.712
			37.345	29.734
			35.734	30.056
			35.96	31.588
			35.808	32.831
			30.401	27.384
			29.751	28.554
			31.04	25.678
			33.153	28.102
			32.542	27.977
			33.169	30.746
			37.407	32.096
			37.367	31.921
			29.282	28.401
			33.48	32.531
			35.463	32.989
			34.898	31.169
			33.299	32.695
			34.706	30.463
			33.859	32.237
			37.13	30.791
			33.22	31.678
			33.989	29.237
			33.198	29.819
			33.373	29.068
			33.994	29.791
			29.508	27.847
			36.102	31.887
			33.203	30.186
			33.017	33.633
			38.836	31.028
			30.729	30.158
			34.435	30.401
			35.215	33.48
			36.734	30.938
			35.542	32.655
			33.175	30.689
			35.429	33.667
			34.825	32.531
			36.537	31.542
			36.079	32.35
			30.164	24.847
			36.384	29.271
			31.497	28.763
			32.458	31.955
			34.802	30.785
			35.706	31.09
			36.785	31.04
			29.023	27.299
			35.503	33.113
			33.356	30.011
			30.09	29.254
			37.712	30.932
			30.932	29.746
			36.842	32.435
			35.593	30.746
			36.147	32.966
			36.192	30.605
			35.424	29.836
			33.644	32.746
			34.836	32.288
			36.729	31.678
			28.672	25.424
			32.684	33.09
			36.028	31.203
			29.825	31.588
			34.073	30.158
			35.282	31.492
			32.723	31.322
			36.09	30.729
			32.384	30.661
			34.412	29.435
			32.339	31.237
			33.588	29.751
			34.282	30.339
			30.644	28.525
			32.599	27.825
			34.554	30.136
			34.672	30.893
			35.424	29.757
			31.548	28.35
			32.305	29.814
			32.243	28.497
			35.864	31.367
			34.362	29.418
			36.644	32.107
			34.65	30.61
			39.418	32.266
			34.757	31.153
			31.266	26.418
			34.469	29.644
			32.621	30.034
			34.91	29.706
			35.831	28.582
			34.305	31.373
			36.124	31.045
			32.22	30.463
			34.463	29.706
			35.345	29.333
			33.503	30.429
			33.288	27.927
			32.232	29.136
			33.559	30.141
			35.22	30.921
			36.249	30.831
			34.706	30.497
			32.107	29.768
			27.537	27.373
			35.989	32.548
			35.842	30.977
			33.497	31.254
			32.836	30.446
			30.35	29.22
			38.175	30.938
			33.949	30.48
			33.949	30.825
			35.305	31.571
			30.802	29.158
			33.655	30.621
			32.576	31.186
			35.458	30.921
			38.831	32.48
			32.667	31.073
			33.605	30.774
			35.09	31.492
			32.605	29.706
			36.124	31.243
			37.232	32.198
			33.429	29.203
			30.723	31.486
			33.559	31.299
			37.339	31.141
			31.249	29.096
			35.356	31.215
			36.757	30.621
			35.497	32.079
			32.209	29.384
			34.017	32.062
			35.215	31.158
			32.938	31.78
			35.034	30.062
			36.718	32.475
			33.763	31.859
			35.808	31
			30.39	28.429
			35.011	28.785
			31.39	29.616
			33.531	30.757
			35.734	29.463
			36.429	29.22
			34.379	31.249
			34.418	29.593
			31.876	29.102
			33.712	29.322
			31.271	31.186
			36.35	32.842
			36.243	32.073
			34.718	31.181
			36.701	30.932
			28.525	29.203
			34.599	32.271
			34.684	29.424
			31.876	32.254
			37.418	31.746
			28.655	28.808
			31.107	27.13
			32.469	30.989
			35.429	30.915
			26.441	24.226
			33.266	30.181
			32.678	29.621
			34.418	27.531
			29.045	26.571
			33.119	30.305
			34.237	30.429
			32.565	29.017
			32.023	27.401
			25.689	23.203
			31.712	30.073
			30.554	30.672
			37.062	31.254
			32.537	27.768
			27.667	24.559
			29.61	25.237
			34.056	25.904
			31.181	29.452
			32.192	27.966
			32.763	24.232
			35.13	27.305
			32.582	27.243
			37.452	30.61
			33.418	29.678
			35.254	29.989
			34.412	30.277
			31.983	30.441
			31.605	29.22
			31.633	27.876
			31.644	28.881
			33.282	30.729
			33.78	29.633
			33.04	30.186
			32.718	29.367
			29.802	27.605
			33.791	25.362
			29.994	26.006
			33.266	26.91
			34.22	29.113
			32.169	27.774
			32.791	29.215
			29.548	29.305
			30	25.554
			34.684	31.633
			27.638	26.452
			35.684	28.282
			34.859	29.288
			31.74	27.169
			38.373	31.203
			32.164	30.328
			38.39	28.644
			33.593	31.169
			33.859	28.017
			32.356	26.887
			32.915	26.209
			32.915	27.249
			33.61	25.994
			35.588	27.576
			34.927	30.322
			31.689	27.441
			35.203	29.983
			35.356	27.249
			33.102	29.311
			32.638	26.119
			35.638	28.288
			31.424	29.429
			35.475	28.26
			32.26	27.52
			34.486	31.119
			33.684	26.927
			30.695	25.644
			32.582	30.554
			29.384	26.655
			33.52	25.718
			33.333	30.565
			32.379	28.333
			30.384	26.893
			34.254	27.638
			30.367	28.254
			29.678	25.672
			34.412	28.26
			34.056	29.079
			38.927	30.203
			33.282	31.011
			33.87	27.435
			35.226	30.734
			31.503	28.085
			27.305	23.073
			31.571	24.802
			33.746	30.864
			32.887	27.859
			31.113	29.011
			33.825	28.192
			35.107	30.04
			33.571	27.859
			34.734	31.277
			34.65	28.215
			31.785	29.09
			31.469	26.927
			34.508	29.395
			32.209	26.718
			34.011	28
			33.096	29.26
			32.972	27.729
			30.192	25.237
			34.271	29.859
			33.401	28.412
			34.147	31.401
			33.763	26.808
			31.825	27.667
			34.537	27.977
			36.599	30.277
			34.582	30.763
			33.26	28.011
			33.045	27.627
			33.175	30.418
			31.757	29.887
			31.169	29.757
			33.881	26.35
			34.531	29.48
			34.367	30.531
			34.305	28.627
			34.249	29.435
			33.446	28.774
			34.757	30.243
			36.209	30.859
			36.621	30.333
			35.605	31.701
			33.395	29.633
			38.322	31.395
			34.141	31.712
			34.328	28.311
			35.565	30.859
			35.486	30.695
			33.373	26.164
			37.333	29.418
			34.74	29.452
			33.48	30.215
			34.972	29.559
			37.096	30.446
			36.492	28.797
			32.559	28.78
			32.949	27.791
			35.249	30.746
			30.96	26.277
			35.051	30.819
			38.034	29.514
			34.446	27.249
			34.226	27.734
			31.91	26.655
			34.525	29.966
			33.825	29.356
			39.395	28.938
			31.972	30.113
			28.576	27.124
			38.65	30.729
			34.966	28.13
			29	25.887
			33.684	27.672
			36.011	29.983
			30.689	25.616
			32.542	27.147
			31.22	26.853
			32.627	29.644
			32.983	29.52
			32.13	28.627
			31.215	27.492
			32.017	25.621
			37.96	30.486
			33.785	29.045
			34.525	29.542
			33.514	29.508
			39.424	31.209
			32.825	27.418
			33.898	30.525
			36.881	27.401
			37.825	29.458
			34.271	29.119
			34.763	31.565
			35.915	30.486
			32.684	28.164
			35.65	30.825
			34.718	29.322
			33.638	29
			36.638	29.633
			34.797	29.887
			29.356	27.52
			36.237	30.328
			36.469	29.678
			31.237	27.932
			36.345	27.023
			34.814	28.356
			36.508	30.362
			36.927	27.661
			35.305	29.011
			33.192	27.802
			33	29.051
			38.87	30.672
			36.977	30.802
			34.989	26.751
			30.158	25.39
			29.74	25.424
			30.35	27.096
			31.249	25.333
			35.153	29.842
			33.04	27.944
			33.678	30.254
			34.904	29.164
			29.831	25.056
			34.395	28.492
			34.757	28.079
			33.508	28.825
			32.266	24.492
			34.249	27.531
			33.401	24.91
			29.554	25.621
			33.904	27.548
			32.644	27.299
			31.26	27.35
			35.78	28.949
			35.559	26.056
			34.864	29.401
			32.977	27.22
			29.463	27.13
			35.282	28.881
			33.362	28.915
			31.576	26.362
			32.695	28.136
			33.435	25.181
			35.91	29.723
			31.288	23.13
			32.062	26.508
			35.644	29.271
			34.373	27.712
			29.028	23.616
			33.424	26.175
			30.887	27.09
			34.345	27.712
			29.203	24.441
			33.288	26.48
			35.175	29.322
			37.333	27.684
			36.621	30.181
			31.718	26.458
			33.418	27.853
			34.13	27.531
			37.621	27.395
			32.734	26.175
			30.554	26.661
			36.638	28.989
			37.062	30.119
			34.056	29.107
			35.819	26.672
			34.282	28.876
			31.763	26.898
			33.475	28.605
			34.994	29.599
			36.215	29.588
			31.35	27.079
			36.051	28.864
			34.181	28.39
			35.927	29.294
			32.531	27.864
			31.927	25.023
			31.814	24.989
			34.153	28.881
			33.576	27.508
			36.339	29.452
			33.079	26.588
			31.294	27.384
			35.345	28.367
			33.153	28.418
			30.904	23.87
			31.785	25.718
			35.475	28.876
			37.751	28.819
			31.616	26.096
			36.141	28.034
			29.486	23.107
			36.096	27.463
			33.757	28.672
			32.136	27.401
			30.87	25.802
			35	28.339
			32.734	26.621
			31.927	27.989
			34.22	26.791
			29.672	24.288
			32.599	27.232
			33.542	26.277
			39.26	28.175
			34	27.401
			30.797	25.141
			35.887	30.186
			31.079	28.599
			26.023	26.475
			35.576	25.672
			30.785	24.136
			34.181	25.65
			38.706	28.017
			37.237	25.87
			35.215	29.616
			32.712	27.458
			38.316	28.729
			32.215	28.678
			35.203	28.921
			36.808	28.684
			30.158	23.808
			34.672	27.418
			36.062	28.994
			36.701	27.78
			29.045	24.446
			37.576	29.407
			35.322	26.96
			32.616	28
			34.701	28.328
			34.565	28.65
			36.412	26.226
			35.119	29
			33.147	25.599
			33.011	24.435
			36.689	27.085
			32.023	26.407
			30.61	25.073
			33.249	26.311
			31.446	27.124
			34.09	28.169
			32.87	29.277
			36.04	28.13
			29.734	26.356
			38.384	29.209
			36.927	27.333
			37.316	27.876
			36.695	28.13
			32.746	24.492
			36.65	27.955
			32.446	24.972
			34.09	24.78
			33.147	24.65
			32.395	25.61
			35.718	25.424
			36.175	25.062
			28.266	22.085
			35.316	26.469
			32	24.904
			32.588	25.695
			32.706	25.695
			33.621	24.215
			37.746	26.356
			32.006	24.915
			33.181	23.305
			33.373	25.712
			37.288	28.424
			35.508	25.966
			34.972	25.254
			33.514	23.65
			37.814	26.893
			35.045	27.299
			33.537	26.384
			30.249	25.701
			30.605	24.09
			29.418	21.356
			32.497	23.78
			31.277	23.661
			31.695	23.282
			35.576	25.158
			33.243	24.898
			27.011	21.119
			35.492	26.028
			32.452	26.04
			33.876	26.983
			32.689	27.684
			31.153	24.153
			32.802	25.559
			33.136	25.068
			34.655	27.299
			34.955	26.582
			30.288	26.531
			36.113	26.435
			36.712	26.52
			35.531	26.48
			33.819	26.983
			38.339	26.023
			33.876	25.384
			34.441	26.051
			35.706	29.045
			34.424	27.633
			33.316	24.48
			34.294	24.367
			37.412	27.028
			30.226	25.209
			31.621	25.192
			33.864	27.237
			33.181	25.831
			34.237	27.339
			31.661	25.085
			32.373	25.271
			32.797	25.819
			31.695	25.136
			32.706	24.729
			32.836	24.627
			34.96	25.537
			30.441	22.181
			31.531	28.712
			38.006	22.192
			32.983	22.593
			33.079	23.91
			32.475	25.401
			33.395	27.192
			33.814	28.356
			33.22	25.514
			33.294	27.107
			33.938	27.158
			34.989	26.311
			31.746	25.904
			34.147	26.949
			33.859	24.588
			33.13	26.525
			34.062	27.61
			32.667	26.684
			32.599	25.836
			33.266	25.237
			36.175	26.254
			36.853	25.633
			32.458	24.689
			37.141	27.898
			35.96	27.571
			34.35	26.379
			34.678	27.13
			34.763	26.299
			32.119	25.492
			34.226	26.401
			33.751	25.542
			31.548	25.599
			32.746	25.864
			35.678	28.107
			32.186	27.13
			36.311	25.904
			32.864	27.237
			34.056	27.819
			35.599	28.113
			36.814	26.616
			30.763	27.407
			39.209	26.96
			34.695	24.605
			36.497	27.441
			37.232	28.13
			36.508	26.847
			36.136	27.147
			32.458	23.096
			37.542	28.706
			36.198	26.814
			32.345	24.644
			31.605	26.13
			30.944	23.955
			34.384	26.243
			30.938	27
			32.582	26.576
			36.169	26.836
			32.119	27.073
			37.898	25.791
			37.554	26.706
			36.463	27.531
			35.599	25.525
			34.045	26.045
			32.915	26.825
			33.328	26.209
			33.672	28.418
			34.237	25.734
			33.045	26.203
			34.881	25.277
			34.028	23.723
			33.169	27.345
			32.723	27.497
			34.226	24.322
			36.831	26.78
			30.294	21.65
			33.475	26.339
			34.689	25.994
			32.04	25.243
			35.04	26.915
			38.492	26.322
			36.028	25.356
			30.881	22.684
			29.373	24.107
			35.153	24.006
			35.158	24.441
			37.356	26.311
			32.836	24.627
			33.627	24.582
			32.955	25.294
			32.073	24.305
			32.989	23.435
			34.102	25.209
			32.729	25.751
			33.243	26.706
			32.113	22.74
			33.141	24.254
			35.949	27.124
			33.559	25.418
			35.48	26.808
			29.412	24.582
			34.667	27.056
			32.497	26.249
			31.638	24.927
			31.441	26.571
			33.616	23.395
			30.356	23.497
			30.819	24.339
			35.277	25.102
			29.825	23.271
			32.096	24.621
			36.379	26.791
			34.469	26.35
			29.763	25.017
			32.814	26.537
			33.418	23.514
			33.164	26.102
			33	24.723
			34.994	26.09
			36.22	25.938
			33.147	27.006
			34.876	26.531
			30.147	25.565
			32.395	25.294
			33.927	26.379
			36.972	25.65
			32.537	25.147
			31.034	26.311
			35.718	25.316
			34.847	26.079
			35.661	26.429
			35.757	23.277
			31.294	26
			35.407	26.068
			38.441	26.932
			34.542	26.96
			35.011	26.254
			35.797	26.463
			34.621	24.181
			33.379	26.864
			37.774	27.051
			31.181	23.096
			33.288	27.141
			33.028	26.853
			32.825	24.141
			34.655	25.718
			33.588	25.26
			34.938	27.068
			35.107	25.983
			34.977	26.559
			32.395	25.734
			35.017	27.09
			35.299	27.723
			34.243	24.859
			32.605	24.136
			34.706	26.463
			33.181	25.073
			30.051	24.672
			31.616	25.52
			35.26	25.571
			35.944	24.497
			28.062	24.362
			30.898	25.944
			36.723	25.825
			33.554	25.825
			34.977	25.525
			29.983	26.056
			35.068	25.712
			35.853	25.458
			34.367	24.723
			34.706	25.898
			32.791	25.475
			33.435	25.825
			31.938	23.627
			34.977	27
			34.921	26.441
			36.847	25.418
			33.588	25.966
			34.644	25.87
			38.751	25.119
			36.299	25.746
			32.791	26.153
			37.74	25.78
			32.328	24.644
			35.395	24.825

## Sheet: Figure 7C.
			Normalizaed intensity
			eater-dsRed	dome-MESO-GFP
			0.452886	0.833256
			0.668242	0.887096
			0.629621	0.953309
			0.502152	0.858005
			0.45181	0.91488
			0.549727	0.872569
			0.608754	0.880601
			0.618554	0.856929
			0.542541	0.916647
			0.469603	0.907732
			0.656752	0.890593
			0.471985	0.818269
			0.561448	0.867766
			0.584236	0.926831
			0.602913	0.902083
			0.63504	0.953309
			0.481746	0.757282
			0.567289	0.867996
			0.513873	0.702329
			0.574014	0.915764
			0.592268	0.97114
			0.489778	0.756168
			0.755553	0.925332
			0.580547	0.887749
			0.461571	0.825225
			0.509992	0.841096
			0.602452	0.942894
			0.66609	0.969603
			0.701906	0.886903
			0.619822	0.985897
			0.539274	0.802206
			0.735762	0.90166
			0.476558	0.807624
			0.598763	0.817193
			0.577703	0.771616
			0.586619	0.912958
			0.578165	0.900123
			0.656329	0.91488
			0.537122	0.871455
			0.640881	0.899278
			0.496734	0.839136
			0.629813	0.901199
			0.557528	0.78964
			0.556452	0.808508
			0.523211	0.878872
			0.628968	0.905541
			0.711475	0.910998
			0.625932	0.93444
			0.613097	0.885366
			0.56164	0.908385
			0.631581	0.904465
			0.488702	0.764853
			0.57901	0.896857
			0.682576	0.79721
			0.657405	0.890131
			0.587503	0.88429
			0.620283	0.817424
			0.557759	0.767927
			0.658251	0.796787
			0.611598	0.844324
			0.71232	0.872108
			0.537545	0.838483
			0.630467	0.90166
			0.582699	0.834794
			0.597917	0.840443
			0.566866	0.866036
			0.373184	0.701483
			0.528015	0.746407
			0.61398	0.875797
			0.761164	0.917301
			0.655676	0.935747
			0.719276	0.890131
			0.555146	0.765314
			0.609638	0.889055
			0.644147	0.929022
			0.837368	0.896857
			0.563408	0.839136
			0.659365	0.804166
			0.542772	0.752709
			0.598993	0.900123
			0.557528	0.799401
			0.608101	0.907079
			0.568365	0.83783
			0.636538	0.780071
			0.710168	0.90143
			0.632426	0.85324
			0.623088	0.942472
			0.531243	0.842825
			0.589424	0.902083
			0.56775	0.855199
			0.545807	0.857813
			0.551226	0.910998
			0.580317	0.878411
			0.663054	0.889939
			0.534279	0.85324
			0.751825	0.950503
			0.599224	0.890593
			0.319153	0.751825
			0.533433	0.745331
			0.561871	0.823073
			0.672393	0.948544
			0.797863	0.932903
			0.509338	0.902967
			0.616786	1
			0.603336	0.91315
			0.710591	0.863884
			0.715587	0.952041
			0.670433	0.955269
			0.719045	0.985897
			0.582507	0.938783
			0.641342	0.948313
			0.730344	0.892322
			0.632849	0.902083
			0.865614	0.928791
			0.638498	0.802859
			0.776382	0.888825
			0.789409	0.946161
			0.71601	0.873415
			0.667589	0.900123
			0.755976	0.88821
			0.60053	0.825455
			0.563831	0.945277
			0.761817	0.908385
			0.65068	0.926639
			0.607255	0.95181
			0.591384	0.93248
			0.531704	0.77227
			0.734686	0.878411
			0.603758	0.849781
			0.479594	0.752479
			0.746637	0.854123
			0.547306	0.684113
			0.56948	0.933134
			0.669549	0.888825
			0.811352	0.950081
			0.656752	0.853009
			0.718853	0.876259
			0.775728	0.896242
			0.704289	0.90143
			0.499577	0.689763
			0.614634	0.80136
			0.575129	0.795481
			0.706479	0.777688
			0.644608	0.88014
			0.61375	0.851049
			0.542772	0.765506
			0.566444	0.773115
			0.720352	0.831104
			0.624164	0.802436
			0.591615	0.883406
			0.648067	0.929214
			0.580125	0.795903
			0.68542	0.8361
			0.669357	0.910998
			0.65068	0.924026
			0.58097	0.8185
			0.46307	0.727961
			0.674775	0.922066
			0.517139	0.730574
			0.56556	0.869533
			0.559488	0.853893
			0.62916	0.867996
			0.567943	0.684767
			0.525171	0.622896
			0.563177	0.739029
			0.699754	0.912728
			0.617016	0.737299
			0.443548	0.749673
			0.619822	0.846707
			0.649143	0.8185
			0.556875	0.747291
			0.768119	0.955269
			0.721659	0.888402
			0.749904	0.908616
			0.596841	0.844324
			0.603566	0.846937
			0.733841	0.809815
			0.533203	0.829567
			0.58316	0.833256
			0.415764	0.697794
			0.610522	0.786796
			0.703635	0.865383
			0.44397	0.641995
			0.555799	0.818077
			0.736876	0.835639
			0.552302	0.825648
			0.591615	0.874721
			0.519753	0.908808
			0.537122	0.724272
			0.61179	0.860195
			0.588156	0.919222
			0.519522	0.902967
			0.567943	0.820652
			0.627431	0.848897
			0.619207	0.891246
			0.671739	0.866267
			0.589424	0.933364
			0.750327	0.90166
			0.694297	0.858235
			0.623972	0.794405
			0.656521	0.906848
			0.732957	0.860618
			0.627661	0.738606
			0.642841	0.895127
			0.595304	0.923373
			0.684959	0.917493
			0.531051	0.835216
			0.44397	0.594651
			0.69668	0.858889
			0.59638	0.782876
			0.699523	0.90143
			0.702137	0.888633
			0.589424	0.926408
			0.540158	0.830643
			0.470679	0.829798
			0.560334	0.891438
			0.580317	0.871032
			0.522558	0.82046
			0.54623	0.863423
			0.638306	0.891246
			0.527784	0.756629
			0.576435	0.882753
			0.389709	0.763124
			0.71036	0.847821
			0.601606	0.819806
			0.659557	0.891015
			0.614634	0.817424
			0.568826	0.795481
			0.661094	0.790062
			0.516717	0.778341
			0.58097	0.771616
			0.792445	0.854738
			0.641111	0.849128
			0.647644	0.895358
			0.530397	0.69691
			0.598763	0.767274
			0.443317	0.754246
			0.583814	0.76858
			0.618092	0.793329
			0.798939	0.907962
			0.597033	0.785297
			0.67931	0.817424
			0.704289	0.922489
			0.46503	0.771386
			0.62916	0.853662
			0.601606	0.872762
			0.710168	0.887749
			0.57705	0.845208
			0.628084	0.851049
			0.652832	0.863884
			0.58685	0.847821
			0.614864	0.810891
			0.647414	0.854969
			0.374721	0.796134
			0.656329	0.876681
			0.637653	0.862578
			0.582046	0.842595
			0.540389	0.654369
			0.565329	0.782223
			0.654139	0.813735
			0.554723	0.804819
			0.574475	0.761394
			0.626777	0.805242
			0.542541	0.771386
			0.506725	0.696488
			0.564023	0.759895
			0.640458	0.82999
			0.609407	0.806548
			0.642187	0.73753
			0.54623	0.80136
			0.627008	0.757936
			0.721889	0.850857
			0.441165	0.830221
			0.666282	0.725156
			0.477404	0.723618
			0.648298	0.81262
			0.585543	0.726424
			0.515641	0.724041
			0.673238	0.785066
			0.600069	0.782223
			0.527131	0.763777
			0.641111	0.78376
			0.613097	0.760088
			0.589424	0.803282
			0.584467	0.730344
			0.536046	0.748789
			0.669779	0.821536
			0.554262	0.728845
			0.558182	0.706902
			0.598109	0.761164
			0.570325	0.752479
			0.509108	0.803743
			0.572516	0.776804
			0.540158	0.69495
			0.518023	0.76247
			0.379717	0.550803
			0.50392	0.749904
			0.551226	0.764661
			0.546038	0.748597
			0.561871	0.68127
			0.610945	0.813504
			0.480901	0.637653
			0.702329	0.826109
			0.725156	0.726232
			0.559258	0.772923
			0.534279	0.812197
			0.687149	0.767274
			0.700599	0.770079
			0.749443	0.805703
			0.613097	0.72016
			0.573822	0.758781
			0.73753	0.78399
			0.596611	0.756629
			0.841711	0.878411
			0.572708	0.804166
			0.722312	0.840635
			0.76858	0.792675
			0.627008	0.795711
			0.662824	0.823073
			0.621128	0.810699
			0.747291	0.920759
			0.502613	0.698217
			0.636346	0.611367
			0.485666	0.739029
			0.622012	0.834332
			0.642649	0.732073
			0.636116	0.782031
			0.707978	0.823265
			0.564907	0.736646
			0.610714	0.861694
			0.55038	0.717739
			0.726001	0.782223
			0.522558	0.684959
			0.67001	0.721889
			0.619399	0.776804
			0.551649	0.794174
			0.667397	0.798517
			0.734494	0.851702
			0.504996	0.771808
			0.813273	0.844132
			0.705365	0.795481
			0.363423	0.4824
			0.474137	0.589655
			0.633964	0.773538
			0.58293	0.834563
			0.683652	0.83391
			0.486973	0.692798
			0.742948	0.810237
			0.591845	0.734494
			0.740105	0.748597
			0.490008	0.696065
			0.831297	0.877335
			0.518869	0.64653
			0.485013	0.645684
			0.506495	0.622435
			0.55211	0.717969
			0.677158	0.763585
			0.524095	0.745984
			0.70083	0.759895
			0.71036	0.818269
			0.623549	0.722735
			0.661978	0.660018
			0.484129	0.717969
			0.605065	0.776151
			0.444854	0.661325
			0.597033	0.659557
			0.643071	0.73142
			0.538429	0.742718
			0.728614	0.8361
			0.669779	0.723388
			0.694105	0.780071
			0.590731	0.72773
			0.512566	0.680616
			0.697141	0.628084
			0.590308	0.71036
			0.625932	0.743602
			0.643071	0.778111
			0.542349	0.660211
			0.614403	0.66586
			0.504535	0.688648
			0.687803	0.703866
			0.658712	0.762701
			0.495235	0.676082
			0.644801	0.749443
			0.6639	0.726654
			0.510184	0.565137
			0.473061	0.588156
			0.549727	0.755976
			0.628084	0.728845
			0.549727	0.71405
			0.708208	0.790062
			0.608985	0.761625
			0.554915	0.701022
			0.504765	0.58685
			0.47848	0.716471
			0.552532	0.800054
			0.686919	0.675851
			0.605526	0.720583
			0.551649	0.697794
			0.439628	0.677811
			0.652409	0.702137
			0.596611	0.752056
			0.450696	0.632657
			0.469833	0.67931
			0.531896	0.602682
			0.475252	0.653908
			0.566636	0.63527
			0.446814	0.669126
			0.739912	0.734686
			0.459842	0.542772
			0.582699	0.709515
			0.423142	0.597264
			0.414457	0.526055
			0.385558	0.56775
			0.314811	0.462647
			0.441357	0.557298
			0.528015	0.686919
			0.473945	0.612021
			0.476328	0.537122
			0.608331	0.674122
			0.471985	0.625701
			0.457421	0.584659
			0.444624	0.547306
			0.489586	0.573361
			0.39751	0.587926
			0.377757	0.51345
			0.441357	0.504535
			0.29721	0.481977
			0.409461	0.564907
			0.43421	0.479786
			0.367343	0.451157
			0.41511	0.381869
			0.41684	0.397933
			0.358658	0.521251
			0.33391	0.390785
			0.446814	0.564253
			0.424641	0.472639
			0.323918	0.302436
			0.474598	0.522135
			0.245754	0.453731
			0.283952	0.405541
			0.334332	0.406425
			0.187341	0.417916
			0.404465	0.386212
			0	0.153063
			0.311967	0.36692
			0.236415	0.348436
			0.301783	0.351933
			0.178234	0.303512
			0.396203	0.450273
			0.361463	0.489778
			0.238606	0.407501
			0.182154	0.326301
			0.271386	0.376451
			0.236415	0.370609
			0.381677	0.429444
			0.38037	0.457651
			0.27984	0.447237
			0.424449	0.500845
			0.275728	0.457651
			0.363654	0.452463
			0.431596	0.501499
			0.371032	0.523672
			0.363193	0.472639
			0.426601	0.440051
			0.291561	0.410115
			0.335409	0.41315
			0.499769	0.490008
			0.513027	0.539505
			0.374068	0.558412
			0.449197	0.488471
			0.472216	0.595073
			0.432903	0.469372
			0.244447	0.483053
			0.361925	0.485666
			0.5636	0.546883
			0.585543	0.580125
			0.416417	0.594651
			0.506302	0.58489
			0.64676	0.598763
			0.682576	0.610522
			0.456575	0.537545
			0.422719	0.519983
			0.489355	0.547959
			0.305472	0.451157
			0.46918	0.545577
			0.510837	0.574014
			0.480901	0.677811
			0.610522	0.646338
			0.580125	0.51933
			0.614634	0.575782
			0.559065	0.605296
			0.476328	0.684767
			0.562947	0.663477
			0.602029	0.605296
			0.612674	0.581623
			0.578357	0.621128
			0.432903	0.550995
			0.370379	0.389055
			0.503036	0.567097
			0.516294	0.443317
			0.600069	0.496964
			0.371455	0.461571
			0.452463	0.532127
			0.593575	0.56164
			0.536469	0.572093
			0.457882	0.514334
			0.527361	0.504996
			0.634617	0.576627
			0.491507	0.56948
			0.493698	0.584236
			0.544731	0.601606
			0.501729	0.542118
			0.616786	0.608101
			0.59638	0.543194
			0.436362	0.581854
			0.46526	0.536046
			0.716471	0.638075
			0.59442	0.657405
			0.570786	0.637653
			0.63527	0.529091
			0.689532	0.571632
			0.658712	0.627431
			0.496734	0.641111
			0.499769	0.59857
			0.612674	0.640266
			0.657405	0.587042
			0.609215	0.529744
			0.557106	0.548613
			0.509992	0.638306
			0.456345	0.504342
			0.407732	0.456575
			0.503689	0.603989
			0.47848	0.539082
			0.626124	0.584006
			0.540158	0.601837
			0.408155	0.539082
			0.36692	0.474598
			0.634386	0.620706
			0.553608	0.607678
			0.71232	0.64676
			0.621782	0.631773
			0.519522	0.552302
			0.471101	0.572938
			0.554723	0.632849
			0.481977	0.561217
			0.477865	0.588348
			0.461994	0.572708
			0.666936	0.692991
			0.660211	0.600069
			0.654792	0.618092
			0.602452	0.51541
			0.619399	0.564676
			0.514103	0.607448
			0.611137	0.641534
			0.409039	0.559258
			0.580317	0.615287
			0.610714	0.618746
			0.568365	0.596188
			0.384713	0.549919
			0.506956	0.46307
			0.540158	0.657405
			0.568596	0.627431
			0.369956	0.478288
			0.555568	0.591384
			0.477212	0.522366
			0.643494	0.48263
			0.60226	0.589885
			0.469603	0.517139
			0.610945	0.537545
			0.508685	0.527784
			0.520829	0.46134
			0.39578	0.401199
			0.512566	0.488049
			0.554915	0.600069
			0.539736	0.544924
			0.606179	0.604873
			0.68542	0.597264
			0.341941	0.393398
			0.628084	0.588348
			0.63112	0.590731
			0.601376	0.587695
			0.577934	0.556875
			0.4457	0.529744
			0.513681	0.585735
			0.638498	0.68127
			0.601606	0.601376
			0.570325	0.649796
			0.636116	0.657175
			0.585543	0.640266
			0.407079	0.524095
			0.762278	0.668473
			0.563177	0.63308
			0.644147	0.691492
			0.484359	0.518215
			0.537353	0.616363
			0.533203	0.677811
			0.50196	0.658251
			0.588809	0.673046
			0.587695	0.647644
			0.455269	0.571209
			0.615287	0.597494
			0.416609	0.539736
			0.541042	0.576627
			0.570133	0.575321
			0.610714	0.606602
			0.433134	0.525402
			0.537545	0.52886
			0.416609	0.43248
			0.485897	0.518215
			0.532549	0.676504
			0.661978	0.704289
			0.543617	0.625471
			0.580125	0.633964
			0.612021	0.538621
			0.559488	0.660211
			0.496503	0.672585
			0.717969	0.666936
			0.570325	0.71601
			0.626124	0.726424
			0.695412	0.71428
			0.683652	0.678042
			0.716893	0.606372
			0.654792	0.739029
			0.613097	0.750557
			0.653486	0.656521
			0.763585	0.687572
			0.729268	0.703213
			0.658712	0.712551
			0.627238	0.674775
			0.702982	0.701906
			0.704097	0.744678
			0.554915	0.581623
			0.507609	0.677388
			0.567097	0.717969
			0.682154	0.671086
			0.511951	0.612904
			0.444854	0.63112
			0.646107	0.655023
			0.499769	0.483706
			0.526708	0.651333
			0.632004	0.621782
			0.585312	0.468527
			0.651987	0.673469
			0.505418	0.51541
			0.441818	0.565137
			0.694528	0.740105
			0.642187	0.674352
			0.478057	0.580547
			0.559488	0.580547
			0.677158	0.605065
			0.668473	0.569902
			0.553839	0.708208
			0.656983	0.679118
			0.454193	0.551226
			0.736415	0.651333
			0.545385	0.623741
			0.617439	0.65264
			0.623319	0.450273
			0.648067	0.596841
			0.48044	0.473715
			0.532549	0.549497
			0.528668	0.47675
			0.489586	0.592038
			0.679118	0.642649
			0.386212	0.341519
			0.570133	0.610945
			0.514334	0.471332
			0.657828	0.528015
			0.541888	0.537545
			0.49216	0.425525
			0.506725	0.556222
			0.371263	0.441357
			0.427254	0.502805
			0.440281	0.424871
			0.481323	0.449389
			0.252709	0.323688
			0.403389	0.334755
			0.461148	0.372531
			0.396434	0.369726
			0.425525	0.421835
			0.302206	0.330413
			0.302859	0.368188
			0.344324	0.379487
			0.446161	0.408808
			0.460034	0.385789
			0.34344	0.328683
			0.530167	0.421605
			0.277688	0.297633
			0.343901	0.402083
			0.423565	0.383829
			0.570133	0.505188
			0.385136	0.453731
			0.176043	0.240527
			0.342134	0.424449
			0.323496	0.454846
			0.376451	0.425102
			0.462416	0.468296
			0.267466	0.371263
			0.468949	0.486319
			0.369495	0.42856
			0.321074	0.578357
			0.473522	0.445508
			0.306548	0.298286
			0.477865	0.453731
			0.519983	0.437476
			0.671278	0.591384
			0.498271	0.512566
			0.713858	0.520829
			0.538621	0.513681
			0.211244	0.26835
			0.582277	0.527361
			0.512374	0.542772
			0.494582	0.445277
			0.406848	0.381446
			0.291984	0.417262
			0.462647	0.501499
			0.383406	0.36496
			0.635923	0.557106
			0.57705	0.549497
			0.446161	0.336292
			0.437476	0.504535
			0.638959	0.368419
			0.368842	0.288102
			0.506956	0.439205
			0.280071	0.257244
			0.419645	0.386673
			0.538621	0.493044
			0.503036	0.481323
			0.503689	0.428983
			0.490239	0.46503
			0.347783	0.354316
			0.408155	0.475252
			0.551879	0.41315
			0.460264	0.460495
			0.431174	0.488049
			0.441357	0.39774
			0.43225	0.46722
			0.258358	0.238798
			0.364077	0.387326
			0.418799	0.36081
			0.372992	0.421835
			0.401199	0.33218
			0.282223	0.247906
			0.388825	0.346284
			0.202098	0.302859
			0.401199	0.335409
			0.160441	0.333449
			0.223157	0.254016
			0.300669	0.408385
			0.279187	0.322381
			0.386212	0.371032
			0.255745	0.359311
			0.446161	0.385136
			0.335639	0.409039
			0.528437	0.447006
			0.421835	0.375797
			0.381216	0.335639
			0.428791	0.38406
			0.333256	0.29502
			0.280071	0.299593
			0.504342	0.365383
			0.333449	0.255092
			0.289178	0.207555
			0.284183	0.261164
			0.466336	0.322189
			0.341058	0.367535
			0.335639	0.352356
			0.326301	0.398163
			0.421182	0.458958
			0.356468	0.436592
			0.335409	0.429444
			0.474137	0.418146
			0.473522	0.476328
			0.420106	0.440051
			0.41707	0.42856
			0.357351	0.319345
			0.270732	0.405964
			0.294827	0.300899
			0.216432	0.180194
			0.190185	0.125893
			0.191492	0.21209
			0.125893	0.161094
			0.3997	0.374299
			0.414649	0.338252
			0.383406	0.341519
			0.374952	0.351472
			0.328683	0.243563
			0.448313	0.338675
			0.309161	0.272039
			0.321536	0.231842
			0.490008	0.391669
			0.465491	0.372531
			0.375605	0.232496
			0.319806	0.298094
			0.490008	0.422911
			0.374952	0.29502
			0.313696	0.268542
			0.374299	0.339559
			0.387096	0.313504
			0.412497	0.272231
			0.338906	0.33391
			0.374299	0.327838
			0.239682	0.355622
			0.305011	0.322189
			0.244216	0.305472
			0.453539	0.238145
			0.383829	0.270271
			0.292868	0.257244
			0.385136	0.36496
			0.633502	0.414034
			0.43225	0.384713
			0.465683	0.361463
			0.359965	0.349743
			0.361463	0.341288
			0.30309	0.409884
			0.300899	0.286335
			0.440704	0.39578
			0.538429	0.359965
			0.450042	0.419222
			0.490431	0.407732
			0.540581	0.51933
			0.499769	0.448736
			0.31262	0.382522
			0.427062	0.356468
			0.61398	0.488049
			0.444393	0.409231
			0.378833	0.314349
			0.451349	0.361271
			0.354738	0.330221
			0.272231	0.319576
			0.39774	0.409692
			0.522788	0.34736
			0.57705	0.425102
			0.364307	0.308278
			0.279187	0.296787
			0.472216	0.405964
			0.523211	0.46918
			0.60422	0.485435
			0.466759	0.43421
			0.464376	0.402083
			0.542349	0.371263
			0.374068	0.447006
			0.47871	0.364499
			0.547959	0.472216
			0.381446	0.276804
			0.598993	0.511721
			0.516486	0.456345
			0.453309	0.437899
			0.425294	0.423987
			0.501307	0.461994
			0.529936	0.503459
			0.586196	0.502805
			0.55015	0.426178
			0.521059	0.527361
			0.550995	0.41684
			0.513681	0.513027
			0.523019	0.468296
			0.432903	0.41096
			0.409692	0.381024
			0.449197	0.344093
			0.470448	0.398163
			0.419645	0.422911
			0.533856	0.390785
			0.498693	0.289409
			0.582507	0.430098
			0.533011	0.424218
			0.432903	0.383176
			0.523672	0.458535
			0.364499	0.340404
			0.621782	0.537776
			0.453078	0.34344
			0.540389	0.441818
			0.556644	0.521059
			0.603105	0.590539
			0.652179	0.466989
			0.3454	0.405964
			0.552532	0.542772
			0.518446	0.520406
			0.533011	0.485013
			0.794597	0.514103
			0.483283	0.401007
			0.499769	0.530397
			0.587503	0.49585
			0.471563	0.406848
			0.59638	0.540389
			0.653486	0.500423
			0.473292	0.562755
			0.504342	0.515833
			0.695604	0.570978
			0.620706	0.546691
			0.408155	0.441165
			0.583814	0.549919
			0.526478	0.429444
			0.484782	0.472216
			0.697141	0.607909
			0.510414	0.540581
			0.559065	0.437476
			0.488471	0.435286
			0.689109	0.601837
			0.481977	0.582046
			0.613327	0.542349
			0.586388	0.550803
			0.659365	0.469372
			0.477404	0.522366
			0.475905	0.453078
			0.412728	0.46134
			0.514526	0.470448
			0.528668	0.500192
			0.563408	0.57144
			0.553608	0.429444
			0.687995	0.567289
			0.579471	0.507148
			0.667397	0.587926
			0.610714	0.582507
			0.670433	0.560564
			0.630467	0.52886
			0.5	0.47848
			0.55015	0.547959
			0.456345	0.489586
			0.607025	0.391438
			0.579471	0.520636
			0.611137	0.515179
			0.603566	0.474137
			0.494774	0.484782
			0.649143	0.476981
			0.660441	0.508685
			0.590078	0.450696
			0.605526	0.487395
			0.493467	0.415302
			0.692337	0.557298
			0.508454	0.513027
			0.552532	0.490008
			0.612251	0.582046
			0.446584	0.48459
			0.709054	0.564676
			0.443548	0.486319
			0.505841	0.420106
			0.44789	0.448966
			0.55407	0.572938
			0.567289	0.517793
			0.594881	0.548421
			0.574898	0.614864
			0.576435	0.523442
			0.461763	0.467873
			0.580317	0.478941
			0.502805	0.569902
			0.500653	0.486319
			0.569019	0.399047
			0.546883	0.573592
			0.509108	0.508032
			0.505188	0.499347
			0.671278	0.609638
			0.351702	0.426601
			0.418799	0.381677
			0.588579	0.404465
			0.575974	0.464837
			0.274191	0.328261
			0.48655	0.439859
			0.523019	0.492814
			0.666282	0.488932
			0.683883	0.464376
			0.46134	0.385558
			0.558182	0.462647
			0.558835	0.524518
			0.504996	0.440281
			0.560141	0.489778
			0.626777	0.454193
			0.502805	0.512144
			0.664361	0.534279
			0.585312	0.521251
			0.614403	0.432672
			0.533856	0.518446
			0.581854	0.363846
			0.454193	0.450042
			0.486973	0.533203
			0.500845	0.5
			0.533664	0.47675
			0.533203	0.361694
			0.439205	0.400123
			0.562755	0.405964
			0.476097	0.38406
			0.547767	0.400776
			0.535393	0.420298
			0.604873	0.413804
			0.453731	0.454615
			0.644378	0.489778
			0.399047	0.385789
			0.424218	0.416186
			0.19864	0.237299
			0.464376	0.432903
			0.546691	0.45181
			0.513681	0.51345
			0.722081	0.467643
			0.613558	0.548843
			0.461994	0.460034
			0.490431	0.537353
			0.530397	0.507609
			0.6179	0.523864
			0.591615	0.549497
			0.556452	0.456575
			0.515833	0.45181
			0.382522	0.306971
			0.483476	0.480247
			0.637653	0.477212
			0.633964	0.422911
			0.403389	0.455499
			0.511721	0.357351
			0.457651	0.468949
			0.495427	0.36496
			0.491315	0.374068
			0.391669	0.387326
			0.528437	0.511951
			0.599646	0.477634
			0.36865	0.459611
			0.534932	0.475252
			0.715587	0.50392
			0.458074	0.378641
			0.542349	0.344747
			0.499347	0.436823
			0.306548	0.269003
			0.566444	0.407079
			0.401007	0.348013
			0.437476	0.3997
			0.41684	0.377527
			0.443548	0.416417
			0.712974	0.435708
			0.374721	0.367112
			0.363846	0.358658
			0.417493	0.360618
			0.323918	0.196026
			0.597033	0.415302
			0.520406	0.324764
			0.462416	0.402083
			0.673469	0.455691
			0.437899	0.313927
			0.524326	0.357121
			0.657828	0.427484
			0.614634	0.404043
			0.340212	0.306318
			0.548613	0.479786
			0.442472	0.36081
			0.540389	0.397933
			0.437015	0.347783
			0.377988	0.326724
			0.300477	0.35324
			0.341519	0.346937
			0.330413	0.353893
			0.393821	0.249865
			0.320652	0.318039
			0.545807	0.41096
			0.660864	0.449197
			0.573361	0.443317
			0.571632	0.4457
			0.32803	0.299593
			0.550995	0.405119
			0.378641	0.286335
			0.411191	0.249865
			0.586619	0.422719
			0.594651	0.380563
			0.530397	0.418569
			0.722542	0.48067
			0.434632	0.351933
			0.557951	0.503036
			0.337791	0.271155
			0.570325	0.471985
			0.447237	0.444201
			0.270925	0.350396
			0.651103	0.429636
			0.461148	0.36496
			0.573361	0.426408
			0.509761	0.409884
			0.519753	0.463723
			0.568596	0.425294
			0.526478	0.444201
			0.46526	0.31654
			0.393398	0.24314
			0.303705	0.244447
			0.46722	0.364307
			0.424218	0.36865
			0.51322	0.356275
			0.57705	0.378641
			0.364499	0.211667
			0.546883	0.392322
			0.675621	0.467412
			0.516063	0.38014
			0.504765	0.36496
			0.46722	0.358005
			0.504112	0.436823
			0.483706	0.288948
			0.241834	0.269195
			0.523864	0.450503
			0.451349	0.283299
			0.435939	0.272692
			0.430098	0.266159
			0.481746	0.293521
			0.534279	0.43225
			0.394243	0.213819
			0.440935	0.341941
			0.456998	0.352778
			0.485666	0.26224
			0.5269	0.472216
			0.413573	0.240105
			0.556644	0.377988
			0.565329	0.414034
			0.399239	0.365383
			0.504765	0.391861
			0.429636	0.38233
			0.451349	0.329567
			0.454846	0.358235
			0.509108	0.365383
			0.559065	0.370148
			0.369495	0.292214
			0.365153	0.395127
			0.505649	0.32999
			0.450503	0.435708
			0.364307	0.459842
			0.470909	0.287219
			0.376028	0.339098
			0.479133	0.403582
			0.550573	0.427484
			0.488279	0.318269
			0.487395	0.474368
			0.462416	0.297441
			0.540158	0.456806
			0.530167	0.375605
			0.53059	0.4457
			0.513681	0.396434
			0.38602	0.298747
			0.544078	0.498271
			0.459611	0.36496
			0.494351	0.42833
			0.521712	0.411421
			0.565329	0.47848
			0.56556	0.423334
			0.458958	0.39555
			0.499577	0.377527
			0.530167	0.300477
			0.628084	0.422489
			0.677388	0.384905
			0.615479	0.397279
			0.624164	0.456152
			0.618323	0.50392
			0.410537	0.294597
			0.385558	0.339559
			0.435093	0.229037
			0.516294	0.322189
			0.492814	0.317385
			0.516909	0.423795
			0.679771	0.475674
			0.678234	0.468949
			0.367535	0.333679
			0.52886	0.492391
			0.605065	0.509992
			0.583353	0.440051
			0.521905	0.498693
			0.575974	0.41292
			0.543425	0.481093
			0.669126	0.425525
			0.518869	0.459611
			0.548421	0.365806
			0.518023	0.388172
			0.524748	0.359311
			0.548613	0.387096
			0.37622	0.31239
			0.629621	0.467643
			0.518215	0.402275
			0.511068	0.53474
			0.734686	0.434632
			0.423142	0.401199
			0.56556	0.410537
			0.595535	0.52886
			0.653908	0.431174
			0.608101	0.497156
			0.517139	0.421605
			0.603758	0.536046
			0.580547	0.492391
			0.646338	0.454385
			0.628737	0.485435
			0.40143	0.197102
			0.640458	0.367112
			0.452655	0.347591
			0.489586	0.470256
			0.579663	0.425294
			0.614403	0.437015
			0.655868	0.435093
			0.357582	0.29133
			0.606602	0.514757
			0.524095	0.39555
			0.398586	0.366459
			0.691492	0.430943
			0.430943	0.385366
			0.658059	0.488702
			0.610061	0.423795
			0.63135	0.509108
			0.63308	0.418377
			0.603566	0.388825
			0.535163	0.500653
			0.58097	0.483053
			0.653716	0.459611
			0.344093	0.219276
			0.498271	0.513873
			0.626777	0.441357
			0.388402	0.456152
			0.551649	0.401199
			0.598109	0.452463
			0.499769	0.44593
			0.62916	0.423142
			0.486742	0.420529
			0.564676	0.373415
			0.485013	0.442664
			0.533011	0.385558
			0.55968	0.408155
			0.419875	0.338444
			0.495004	0.311544
			0.570133	0.400354
			0.574668	0.429444
			0.603566	0.385789
			0.454615	0.331719
			0.483706	0.387979
			0.481323	0.337368
			0.620475	0.44766
			0.562755	0.372762
			0.65045	0.476097
			0.573822	0.418569
			0.757052	0.482207
			0.577934	0.439436
			0.443778	0.257474
			0.566866	0.381446
			0.49585	0.396434
			0.583814	0.383829
			0.619207	0.340635
			0.560564	0.44789
			0.630467	0.435286
			0.48044	0.41292
			0.566636	0.383829
			0.60053	0.369495
			0.529744	0.411613
			0.521482	0.315464
			0.480901	0.361925
			0.531896	0.400546
			0.595727	0.43052
			0.63527	0.427062
			0.575974	0.414226
			0.476097	0.386212
			0.300477	0.294174
			0.625279	0.493044
			0.61963	0.432672
			0.529513	0.443317
			0.504112	0.412267
			0.408577	0.365153
			0.709284	0.431174
			0.546883	0.413573
			0.546883	0.426831
			0.598993	0.455499
			0.425947	0.36277
			0.535585	0.418992
			0.49412	0.440704
			0.604873	0.43052
			0.734494	0.490431
			0.497617	0.436362
			0.533664	0.424871
			0.590731	0.452463
			0.495235	0.383829
			0.630467	0.442894
			0.673046	0.479594
			0.5269	0.364499
			0.422911	0.452233
			0.531896	0.445046
			0.677158	0.438975
			0.443125	0.360387
			0.600953	0.441818
			0.654792	0.418992
			0.606372	0.475021
			0.480017	0.371455
			0.549497	0.474368
			0.595535	0.439628
			0.508032	0.463531
			0.588579	0.39751
			0.653293	0.490239
			0.539736	0.466567
			0.618323	0.433556
			0.410115	0.334755
			0.587695	0.348436
			0.448544	0.38037
			0.53082	0.424218
			0.615479	0.374491
			0.642187	0.365153
			0.563408	0.443125
			0.564907	0.379487
			0.46722	0.360618
			0.537776	0.369072
			0.44397	0.440704
			0.639151	0.504342
			0.63504	0.474791
			0.576435	0.440512
			0.65264	0.430943
			0.338444	0.364499
			0.571862	0.4824
			0.575129	0.372992
			0.46722	0.481746
			0.680194	0.462224
			0.34344	0.34932
			0.437668	0.284836
			0.490008	0.433134
			0.603758	0.43029
			0.258358	0.173238
			0.520636	0.402083
			0.49804	0.380563
			0.564907	0.300246
			0.358427	0.263354
			0.514987	0.406848
			0.557951	0.411613
			0.493698	0.357351
			0.472869	0.29525
			0.22946	0.133925
			0.460918	0.397933
			0.416417	0.420952
			0.666513	0.443317
			0.492622	0.309354
			0.305472	0.186035
			0.38014	0.21209
			0.550995	0.237722
			0.440512	0.374068
			0.479364	0.316963
			0.501307	0.173469
			0.592268	0.291561
			0.494351	0.289178
			0.6815	0.418569
			0.526478	0.382753
			0.597033	0.394704
			0.564676	0.405772
			0.471332	0.412074
			0.456806	0.365153
			0.457882	0.313504
			0.458305	0.352125
			0.521251	0.423142
			0.540389	0.381024
			0.511951	0.402275
			0.499577	0.370802
			0.387518	0.30309
			0.540812	0.216893
			0.394897	0.241642
			0.520636	0.276382
			0.557298	0.361041
			0.47848	0.309584
			0.502383	0.36496
			0.377757	0.368419
			0.395127	0.224272
			0.575129	0.457882
			0.304358	0.258781
			0.613558	0.329106
			0.581854	0.367766
			0.461994	0.286335
			0.716893	0.441357
			0.478288	0.407732
			0.717547	0.343017
			0.533203	0.440051
			0.543425	0.318922
			0.485666	0.275498
			0.507148	0.249443
			0.507148	0.289409
			0.533856	0.241181
			0.609869	0.301975
			0.584467	0.407501
			0.460034	0.296787
			0.595073	0.394474
			0.600953	0.289409
			0.514334	0.36865
			0.496503	0.245984
			0.61179	0.329337
			0.44985	0.373184
			0.605526	0.328261
			0.481977	0.299823
			0.56752	0.438129
			0.5367	0.277035
			0.421835	0.22773
			0.494351	0.416417
			0.371455	0.266582
			0.530397	0.230574
			0.523211	0.41684
			0.48655	0.331066
			0.409884	0.275728
			0.558604	0.304358
			0.409231	0.32803
			0.382753	0.228806
			0.564676	0.328261
			0.550995	0.359734
			0.738183	0.402928
			0.521251	0.433979
			0.543848	0.296557
			0.595957	0.423334
			0.452886	0.321536
			0.291561	0.128929
			0.455499	0.195373
			0.539082	0.42833
			0.506072	0.312851
			0.437899	0.357121
			0.542118	0.325648
			0.591384	0.396664
			0.532357	0.312851
			0.57705	0.444201
			0.573822	0.326531
			0.463723	0.360157
			0.451579	0.277035
			0.568365	0.371878
			0.480017	0.269003
			0.549266	0.318269
			0.514103	0.36669
			0.509338	0.307855
			0.402506	0.21209
			0.559258	0.389709
			0.525824	0.334102
			0.554492	0.448966
			0.539736	0.272462
			0.46526	0.305472
			0.56948	0.317385
			0.64872	0.405772
			0.571209	0.424449
			0.520406	0.318692
			0.512144	0.303935
			0.517139	0.411191
			0.462647	0.390785
			0.440051	0.385789
			0.54427	0.254861
			0.569249	0.375144
			0.562947	0.415533
			0.560564	0.342364
			0.558412	0.373415
			0.527554	0.348013
			0.577934	0.404465
			0.633733	0.428138
			0.649566	0.407924
			0.610522	0.460495
			0.525594	0.381024
			0.714934	0.448736
			0.554262	0.460918
			0.561448	0.330221
			0.608985	0.428138
			0.605949	0.421835
			0.524748	0.247713
			0.676927	0.372762
			0.577281	0.374068
			0.52886	0.403389
			0.586196	0.37818
			0.66782	0.412267
			0.644608	0.348897
			0.493467	0.348244
			0.508454	0.310237
			0.596841	0.423795
			0.432019	0.252056
			0.589232	0.426601
			0.703866	0.376451
			0.565983	0.289409
			0.557528	0.308047
			0.468527	0.266582
			0.569019	0.393821
			0.542118	0.370379
			0.756168	0.354316
			0.470909	0.39947
			0.340404	0.284605
			0.727538	0.423142
			0.585966	0.323265
			0.356698	0.237069
			0.5367	0.305664
			0.626124	0.394474
			0.421605	0.226654
			0.492814	0.285489
			0.442011	0.274191
			0.49608	0.381446
			0.509761	0.376681
			0.476981	0.342364
			0.441818	0.298747
			0.472639	0.226847
			0.701022	0.413804
			0.540581	0.358427
			0.569019	0.377527
			0.530167	0.37622
			0.757282	0.441588
			0.503689	0.295903
			0.544924	0.415302
			0.659557	0.29525
			0.695834	0.374299
			0.559258	0.361271
			0.578165	0.455269
			0.622435	0.413804
			0.498271	0.324572
			0.612251	0.426831
			0.576435	0.369072
			0.534932	0.356698
			0.650219	0.381024
			0.579471	0.390785
			0.370379	0.299823
			0.634809	0.407732
			0.643725	0.382753
			0.442664	0.315656
			0.638959	0.280724
			0.580125	0.33195
			0.645223	0.409039
			0.661325	0.305242
			0.598993	0.357121
			0.517793	0.31066
			0.510414	0.358658
			0.735993	0.420952
			0.663246	0.425947
			0.58685	0.270271
			0.401199	0.217969
			0.385136	0.219276
			0.408577	0.283529
			0.443125	0.215779
			0.593152	0.389055
			0.511951	0.316117
			0.536469	0.404888
			0.583583	0.363001
			0.388633	0.205134
			0.564023	0.337176
			0.577934	0.321305
			0.529936	0.349973
			0.482207	0.18346
			0.558412	0.300246
			0.525824	0.199523
			0.377988	0.226847
			0.545154	0.300899
			0.496734	0.29133
			0.443548	0.29329
			0.617247	0.354738
			0.608754	0.243563
			0.582046	0.372108
			0.50953	0.288295
			0.374491	0.284836
			0.598109	0.352125
			0.524326	0.353432
			0.455691	0.255322
			0.498693	0.323496
			0.527131	0.209938
			0.622243	0.384482
			0.444624	0.13112
			0.474368	0.260933
			0.612021	0.367112
			0.563177	0.307202
			0.357774	0.149796
			0.526708	0.248136
			0.429214	0.283299
			0.562101	0.307202
			0.364499	0.1815
			0.521482	0.259857
			0.593997	0.369072
			0.676927	0.306126
			0.649566	0.402083
			0.461148	0.259012
			0.526478	0.31262
			0.553839	0.300246
			0.687995	0.29502
			0.500192	0.248136
			0.416417	0.266813
			0.650219	0.356275
			0.666513	0.3997
			0.550995	0.36081
			0.618746	0.267235
			0.55968	0.351933
			0.462878	0.27592
			0.528668	0.341519
			0.587042	0.379717
			0.633964	0.379294
			0.447006	0.282876
			0.627661	0.351472
			0.555799	0.333256
			0.622896	0.367996
			0.492391	0.313043
			0.46918	0.203866
			0.464837	0.202559
			0.554723	0.352125
			0.532549	0.299362
			0.638729	0.374068
			0.51345	0.264007
			0.444854	0.294597
			0.60053	0.332373
			0.516294	0.334332
			0.429867	0.159557
			0.463723	0.230574
			0.605526	0.351933
			0.692991	0.349743
			0.457228	0.2451
			0.63112	0.319576
			0.375375	0.130236
			0.629391	0.297633
			0.539505	0.344093
			0.477212	0.29525
			0.42856	0.233802
			0.587272	0.331297
			0.500192	0.265276
			0.46918	0.317846
			0.557298	0.271808
			0.382522	0.175621
			0.495004	0.288756
			0.531243	0.252056
			0.75098	0.324994
			0.548843	0.29525
			0.425755	0.208401
			0.621359	0.402275
			0.436592	0.341288
			0.242295	0.259665
			0.609407	0.228806
			0.425294	0.169779
			0.555799	0.227961
			0.72969	0.318922
			0.673238	0.236415
			0.595535	0.38037
			0.499347	0.297441
			0.714703	0.346284
			0.480247	0.344324
			0.595073	0.353662
			0.656752	0.344555
			0.401199	0.157175
			0.574668	0.295903
			0.628084	0.356468
			0.65264	0.309815
			0.358427	0.181692
			0.686265	0.372339
			0.599646	0.278303
			0.495658	0.318269
			0.575782	0.330874
			0.570556	0.343248
			0.641534	0.250096
			0.591845	0.356698
			0.516063	0.226001
			0.510837	0.18127
			0.652179	0.283107
			0.472869	0.257052
			0.418569	0.205787
			0.519983	0.253363
			0.450696	0.284605
			0.552302	0.324764
			0.505418	0.367343
			0.627238	0.323265
			0.384905	0.255092
			0.717316	0.36473
			0.661325	0.292637
			0.676274	0.313504
			0.652409	0.323265
			0.500653	0.18346
			0.65068	0.31654
			0.489125	0.201906
			0.552302	0.194528
			0.516063	0.189532
			0.487165	0.226424
			0.614864	0.219276
			0.632426	0.205365
			0.328491	0.090961
			0.599416	0.259434
			0.471985	0.199293
			0.494582	0.22969
			0.499116	0.22969
			0.534279	0.172815
			0.692798	0.255092
			0.472216	0.199716
			0.51737	0.137845
			0.524748	0.230344
			0.675198	0.334563
			0.606794	0.240105
			0.586196	0.212743
			0.530167	0.151103
			0.695412	0.275728
			0.589002	0.29133
			0.531051	0.256168
			0.404696	0.229921
			0.418377	0.168012
			0.372762	0.062947
			0.491084	0.156099
			0.444201	0.151526
			0.460264	0.136961
			0.609407	0.209054
			0.519753	0.199062
			0.280263	0.053839
			0.606179	0.242487
			0.489355	0.242948
			0.544078	0.279187
			0.498463	0.306126
			0.439436	0.170433
			0.502805	0.224464
			0.515641	0.205595
			0.574014	0.29133
			0.585543	0.263777
			0.406195	0.261817
			0.630044	0.258128
			0.653063	0.261394
			0.607678	0.259857
			0.541888	0.279187
			0.715587	0.242295
			0.544078	0.217739
			0.56579	0.243371
			0.614403	0.358427
			0.565137	0.304166
			0.522558	0.182999
			0.560141	0.178657
			0.679963	0.280916
			0.403812	0.211014
			0.457421	0.21036
			0.543617	0.288948
			0.51737	0.234917
			0.557951	0.292868
			0.458958	0.206249
			0.486319	0.213396
			0.502613	0.234455
			0.460264	0.208208
			0.499116	0.192568
			0.504112	0.188648
			0.585735	0.223618
			0.412074	0.094651
			0.453962	0.345631
			0.70279	0.095073
			0.509761	0.110483
			0.51345	0.161094
			0.490239	0.218392
			0.525594	0.287219
			0.541695	0.33195
			0.518869	0.222735
			0.521712	0.283952
			0.546461	0.285912
			0.58685	0.253363
			0.462224	0.237722
			0.554492	0.27788
			0.543425	0.187149
			0.51541	0.261586
			0.551226	0.303282
			0.497617	0.267697
			0.495004	0.235109
			0.520636	0.21209
			0.632426	0.251172
			0.658481	0.227308
			0.489586	0.191031
			0.669549	0.314349
			0.624164	0.301783
			0.562293	0.255976
			0.574898	0.284836
			0.578165	0.252901
			0.476558	0.221889
			0.557528	0.256821
			0.539274	0.223811
			0.454615	0.226001
			0.500653	0.236185
			0.613327	0.322381
			0.479133	0.284836
			0.637653	0.237722
			0.505188	0.288948
			0.550995	0.311314
			0.610291	0.322612
			0.656983	0.265083
			0.424449	0.295481
			0.74902	0.278303
			0.575551	0.187803
			0.644801	0.296787
			0.673046	0.323265
			0.645223	0.27396
			0.630928	0.285489
			0.489586	0.129813
			0.684959	0.3454
			0.63331	0.272692
			0.485243	0.189301
			0.456806	0.246407
			0.431404	0.162824
			0.5636	0.250749
			0.431174	0.27984
			0.494351	0.263546
			0.632196	0.273538
			0.476558	0.282645
			0.69864	0.233379
			0.68542	0.268542
			0.643494	0.300246
			0.610291	0.223157
			0.550573	0.24314
			0.507148	0.273115
			0.523019	0.249443
			0.536239	0.334332
			0.557951	0.231189
			0.512144	0.249212
			0.582699	0.213627
			0.549919	0.153908
			0.516909	0.293098
			0.499769	0.298939
			0.557528	0.176927
			0.657636	0.271386
			0.406425	0.074245
			0.528668	0.254439
			0.575321	0.241181
			0.473522	0.21232
			0.588809	0.276574
			0.721466	0.253785
			0.626777	0.216663
			0.428983	0.11398
			0.371032	0.168665
			0.593152	0.164784
			0.593344	0.1815
			0.677811	0.253363
			0.504112	0.188648
			0.534509	0.186919
			0.508685	0.21428
			0.474791	0.176274
			0.509992	0.142841
			0.552763	0.211014
			0.5	0.231842
			0.519753	0.268542
			0.476328	0.116133
			0.515833	0.174314
			0.623741	0.284605
			0.531896	0.219045
			0.605718	0.272462
			0.372531	0.186919
			0.574475	0.281992
			0.491084	0.25098
			0.458074	0.200177
			0.450503	0.263354
			0.534087	0.141304
			0.408808	0.145223
			0.426601	0.177581
			0.597917	0.206902
			0.388402	0.136538
			0.475674	0.188417
			0.640266	0.271808
			0.566866	0.254861
			0.38602	0.203635
			0.503266	0.262047
			0.526478	0.145877
			0.516717	0.245331
			0.510414	0.192337
			0.587042	0.24487
			0.634156	0.239029
			0.516063	0.280071
			0.582507	0.261817
			0.400776	0.224694
			0.487165	0.21428
			0.546038	0.255976
			0.663054	0.227961
			0.492622	0.208631
			0.434863	0.253363
			0.614864	0.215126
			0.581393	0.244447
			0.612674	0.257897
			0.616363	0.136769
			0.444854	0.241411
			0.602913	0.244024
			0.719507	0.277227
			0.569672	0.278303
			0.587695	0.251172
			0.6179	0.259204
			0.572708	0.171509
			0.524979	0.274614
			0.693874	0.2818
			0.440512	0.129813
			0.521482	0.285259
			0.51149	0.274191
			0.503689	0.169972
			0.574014	0.230574
			0.533011	0.212974
			0.58489	0.282453
			0.591384	0.240758
			0.586388	0.262893
			0.487165	0.231189
			0.587926	0.283299
			0.598763	0.307624
			0.558182	0.197564
			0.495235	0.169779
			0.575974	0.259204
			0.51737	0.205787
			0.397087	0.190377
			0.457228	0.222965
			0.597264	0.224925
			0.623549	0.183652
			0.320652	0.178464
			0.429636	0.239259
			0.653486	0.234686
			0.531704	0.234686
			0.586388	0.223157
			0.394474	0.243563
			0.589885	0.230344
			0.620052	0.220583
			0.562947	0.192337
			0.575974	0.237491
			0.502383	0.221236
			0.527131	0.234686
			0.469603	0.150219
			0.586388	0.27984
			0.584236	0.258358
			0.658251	0.219045
			0.533011	0.240105
			0.573592	0.236415
			0.73142	0.207555
			0.637192	0.23165
			0.502383	0.247291
			0.692568	0.232957
			0.48459	0.189301
			0.602452	0.196257

## Sheet: Figure 7C..
			Ratio
			0.760924
			0.866945
			0.810825
			0.77976
			0.723148
			0.801975
			0.834072
			0.852369
			0.776572
			0.736934
			0.858135
			0.780278
			0.811556
			0.796628
			0.819758
			0.813992
			0.818131
			0.815034
			0.870927
			0.795789
			0.780858
			0.824039
			0.899126
			0.813307
			0.770271
			0.79291
			0.799815
			0.82429
			0.887515
			0.790051
			0.831449
			0.900025
			0.788506
			0.861308
			0.873207
			0.804669
			0.8058
			0.845422
			0.794787
			0.844059
			0.78558
			0.83641
			0.849998
			0.839071
			0.782685
			0.833718
			0.880435
			0.817686
			0.834296
			0.791886
			0.83583
			0.818632
			0.807901
			0.926278
			0.858772
			0.819256
			0.874844
			0.862245
			0.910882
			0.854734
			0.901962
			0.811469
			0.836572
			0.841703
			0.848249
			0.815757
			0.775018
			0.854807
			0.839724
			0.906786
			0.834619
			0.896318
			0.862009
			0.830327
			0.831112
			0.964047
			0.827333
			0.907293
			0.86101
			0.818363
			0.844669
			0.820415
			0.831118
			0.906665
			0.884725
			0.862933
			0.812151
			0.80533
			0.811632
			0.821786
			0.806874
			0.784405
			0.817808
			0.862301
			0.802009
			0.883695
			0.823235
			0.71338
			0.859024
			0.834768
			0.838157
			0.920125
			0.762976
			0.781985
			0.814581
			0.905469
			0.861705
			0.833722
			0.846957
			0.789997
			0.82007
			0.901835
			0.837794
			0.96254
			0.894681
			0.931711
			0.908004
			0.903501
			0.859739
			0.919661
			0.85793
			0.776018
			0.912031
			0.836166
			0.798453
			0.798195
			0.842769
			0.912157
			0.846956
			0.819308
			0.933316
			0.905117
			0.784932
			0.866828
			0.918769
			0.878158
			0.903669
			0.927138
			0.881181
			0.868612
			0.880235
			0.858133
			0.953623
			0.856198
			0.852499
			0.853777
			0.864996
			0.930294
			0.885736
			0.822203
			0.833341
			0.861115
			0.905461
			0.855195
			0.837465
			0.849306
			0.821707
			0.852786
			0.856593
			0.813201
			0.817326
			0.853091
			0.919013
			0.929218
			0.882513
			0.872507
			0.919546
			0.79692
			0.85859
			0.892557
			0.873481
			0.890748
			0.898707
			0.904755
			0.845523
			0.848337
			0.951533
			0.813291
			0.842806
			0.806236
			0.885873
			0.900348
			0.858527
			0.833561
			0.938017
			0.827367
			0.826577
			0.766551
			0.87372
			0.846468
			0.80258
			0.769108
			0.839895
			0.862156
			0.835027
			0.880218
			0.796619
			0.908802
			0.898552
			0.890196
			0.849617
			0.921117
			0.925856
			0.847365
			0.804851
			0.861193
			0.809056
			0.888583
			0.899662
			0.878947
			0.878309
			0.886723
			0.799909
			0.817119
			0.773789
			0.799231
			0.821513
			0.81124
			0.804343
			0.846609
			0.848885
			0.813277
			0.754472
			0.914385
			0.861684
			0.859617
			0.871258
			0.854075
			0.916677
			0.829681
			0.875342
			0.961368
			0.870546
			0.850152
			0.885531
			0.889502
			0.794358
			0.878947
			0.887022
			0.934548
			0.877992
			0.912318
			0.870137
			0.799653
			0.860679
			0.833699
			0.892081
			0.83271
			0.861408
			0.869852
			0.837458
			0.875034
			0.871301
			0.728799
			0.865181
			0.861185
			0.837191
			0.919284
			0.859157
			0.898442
			0.839945
			0.876957
			0.885818
			0.850343
			0.86951
			0.870936
			0.880627
			0.873974
			0.936237
			0.836361
			0.913618
			0.919826
			0.754997
			0.960299
			0.833792
			0.89536
			0.905078
			0.859358
			0.927516
			0.881716
			0.844467
			0.907461
			0.903157
			0.863002
			0.90197
			0.858786
			0.903908
			0.882561
			0.89846
			0.89265
			0.879386
			0.811311
			0.866874
			0.893445
			0.839202
			0.869255
			0.836842
			0.859804
			0.865529
			0.917027
			0.871084
			0.887665
			0.921849
			0.999275
			0.86041
			0.822975
			0.94746
			0.954524
			0.964015
			0.927557
			0.878038
			0.969865
			0.894333
			0.97757
			0.851811
			0.925973
			0.984459
			0.891401
			0.898629
			0.879135
			0.896653
			0.865653
			1.01825
			0.830727
			0.866639
			0.939976
			0.905236
			0.92708
			0.885077
			0.84502
			0.886574
			0.963492
			0.887433
			0.964938
			0.897426
			0.843725
			0.915747
			0.927175
			0.825562
			0.980736
			0.941981
			0.904062
			0.914266
			0.908851
			0.841969
			0.905597
			0.858104
			0.957085
			0.904406
			0.994362
			0.858264
			0.971844
			0.909091
			0.885515
			0.915996
			0.887607
			0.94319
			0.852441
			0.961081
			0.931531
			0.933005
			1.00138
			0.841541
			0.888463
			0.847456
			0.955885
			0.940672
			0.863849
			0.932562
			0.963806
			0.944099
			0.907774
			0.883165
			1.04983
			0.918226
			0.921624
			0.912075
			0.916879
			0.963855
			0.872708
			0.98901
			0.931606
			0.873871
			0.930571
			0.957724
			0.958459
			0.914485
			0.863747
			0.93222
			0.888352
			0.947116
			0.899537
			0.899842
			0.938952
			0.838564
			0.841108
			1.00772
			0.922171
			0.899593
			0.834083
			0.965938
			0.897042
			0.86913
			0.854232
			0.947968
			0.873441
			0.95073
			0.844196
			1.0035
			0.936233
			0.91357
			0.871497
			0.913072
			0.862548
			0.878861
			0.911835
			0.890006
			0.899198
			0.953049
			0.954053
			0.888889
			0.905216
			0.921319
			0.937063
			0.858497
			0.893256
			0.94995
			0.850961
			0.882474
			0.963171
			0.930669
			1.02917
			1.01636
			0.872874
			0.95048
			0.911165
			0.960989
			1.02026
			0.962858
			0.828327
			0.895478
			0.938074
			0.803877
			1.01596
			0.831948
			0.951138
			0.898732
			0.954807
			0.881952
			0.955241
			0.897144
			0.855056
			0.867028
			0.907366
			0.881071
			0.959764
			0.936415
			0.861079
			0.9393
			0.850318
			0.926616
			0.944489
			0.880882
			0.911047
			0.988771
			0.898486
			0.933605
			1.00782
			0.979589
			0.859938
			0.968485
			0.909184
			0.970281
			0.807699
			0.900482
			1.01281
			1.00405
			0.868209
			0.941468
			1.03538
			1.05266
			0.937489
			0.923877
			0.955117
			0.87949
			0.941383
			0.952561
			0.862833
			0.974492
			1.0476
			1.02913
			0.966083
			0.855503
			0.929265
			0.997604
			1.02318
			0.968981
			0.909766
			0.983714
			0.951646
			1.06076
			1.08218
			0.926093
			0.938239
			1.0242
			0.973212
			0.955622
			1.01771
			1.04346
			0.941251
			0.932533
			0.95816
			0.968928
			1.00636
			1.04088
			0.891391
			0.945288
			1.05616
			0.955492
			0.952081
			1.08251
			1.08869
			1.02258
			0.896789
			0.927155
			0.980263
			1.05232
			1.06173
			1.0065
			0.908087
			0.961969
			0.959777
			0.926344
			0.953269
			1.03139
			0.954634
			0.89904
			0.912623
			1.00992
			0.960401
			1.04668
			0.992809
			0.974978
			0.92347
			0.943818
			0.939922
			0.917923
			0.916785
			0.98204
			1.04429
			1.02667
			1.06837
			1.04138
			0.931626
			0.978276
			0.885939
			0.97453
			0.994165
			0.97945
			0.873663
			1.03595
			0.917149
			0.957525
			0.912355
			0.973453
			0.964726
			1.12969
			1.00918
			0.962713
			1.05667
			0.985143
			1.0488
			0.995325
			1.01968
			0.966745
			0.996017
			1.00096
			1.06506
			0.9553
			1.02952
			1.02995
			1.01017
			1.01602
			0.934722
			0.946367
			0.970277
			1.00017
			0.943539
			0.985116
			0.960857
			0.908712
			1.06577
			0.94974
			0.967331
			0.973466
			0.942501
			0.899267
			0.889625
			0.941126
			0.957343
			0.912758
			1.01313
			0.905103
			0.973332
			0.996108
			1.00301
			0.928092
			1.00675
			0.986665
			0.974671
			0.89963
			0.971061
			0.940823
			0.961314
			1.05662
			0.928966
			0.876894
			1.03582
			0.901147
			0.93242
			0.987182
			1.00391
			1.08102
			0.943721
			0.908864
			0.997853
			1.05259
			1.01783
			0.963382
			0.966816
			1.00074
			0.97299
			0.980059
			0.881698
			0.897763
			1.00775
			0.926346
			0.865886
			0.993689
			1.01294
			0.911555
			1.00741
			1.09524
			0.98499
			0.992152
			0.90678
			0.969572
			0.97754
			0.923417
			0.984264
			1.0529
			1.07424
			0.894697
			0.984595
			0.92587
			1.06038
			0.943281
			0.975042
			1.14325
			1.03782
			1.00546
			0.987036
			1.04206
			0.924097
			1.02604
			1.04066
			0.970182
			1.03499
			1.10096
			1.00335
			1.05631
			0.96233
			0.941544
			0.940065
			1.01303
			1.02645
			0.934366
			1.06282
			1.0784
			1.02369
			1.00313
			0.974078
			0.941978
			0.969081
			1.03202
			1.06493
			1.01358
			1.09205
			0.981102
			0.949836
			1.03481
			1.05142
			0.943378
			0.935404
			0.930371
			0.891678
			0.958869
			0.995204
			0.908064
			0.986038
			0.950211
			0.807438
			1.02328
			1.00782
			1.01992
			1.06903
			1.05922
			0.988746
			1.15097
			1.01962
			0.944347
			1.04273
			0.976627
			1.04098
			1.0223
			0.89338
			0.969147
			1.01643
			1.05994
			1.02108
			1.10042
			0.946875
			1.24023
			1.0772
			1.0566
			1.02249
			1.02881
			1.03644
			1.01752
			1.06295
			1.02062
			0.994125
			0.945582
			1.11848
			0.999811
			0.954346
			1.03775
			0.971452
			1.01963
			0.979696
			1.05184
			0.958593
			1.06332
			1.03412
			1.03853
			0.904997
			1.06018
			0.841451
			0.9695
			0.907629
			0.96001
			1.01345
			0.907286
			1.0534
			0.937092
			1.06759
			1.04061
			1.04168
			1.03918
			1.03632
			0.981537
			1.12373
			1.07736
			1.08456
			1.02259
			1.13348
			0.97647
			0.984941
			0.93783
			0.968952
			0.932913
			0.920791
			1.04762
			0.997727
			0.983349
			0.990314
			1.03529
			0.883792
			0.994265
			1.03864
			1.07276
			0.978761
			0.96169
			1.02244
			1.0697
			1.03811
			1.02117
			1.08501
			1.1
			1.03605
			1.09064
			1.08556
			1.08224
			1.14452
			1.02056
			1.05683
			1.07593
			1.044
			1.03166
			1.0687
			1.13618
			1.00458
			1.0428
			0.895865
			0.984094
			0.942386
			1.21628
			1.11046
			1.0351
			1.01797
			1.18729
			1.04161
			1.09312
			1.00923
			1.01836
			0.908537
			1.01395
			1.03895
			1.15967
			1.02619
			1.07096
			1.01664
			1.0423
			0.938696
			1.06336
			1.10109
			1.03013
			1.06015
			1.0805
			1.02253
			0.956053
			0.989763
			1.15874
			1.12846
			1.05256
			0.98331
			1.05693
			1.04404
			1.09555
			1.02731
			1.05371
			1.15154
			0.939458
			1.10177
			1.06158
			1.10115
			1.06875
			1.04954
			1.01289
			1.00111
			1.03223
			1.02099
			1.06615
			1.10471
			0.995096
			1.11422
			1.00051
			1.04463
			1.01877
			1.02517
			1.09539
			1.06254
			0.997233
			1.12457
			1.19986
			1.12831
			1.09204
			1.04358
			1.05356
			1.02194
			1.06484
			1.09956
			1.08217
			1.02783
			1.00932
			1.15121
			0.947956
			1.00751
			0.998467
			1.03862
			1.22054
			1.071
			0.976223
			1.07311
			1.05557
			1.04313
			1.12166
			0.932251
			0.990978
			1.09379
			1.05674
			0.972466
			1.02592
			1.08173
			1.01022
			1.06534
			0.976765
			1.10173
			1.04458
			1.06419
			0.92531
			1.05459
			1.0272
			1.15483
			0.964876
			1.01885
			0.960124
			1.03589
			1.02264
			0.993957
			1.10459
			1.0911
			1.05718
			1.05906
			1.02105
			1.08334
			1.07897
			1.01741
			1.00168
			0.97335
			1.1876
			1.04602
			1.07538
			1.10507
			1.00804
			1.13943
			1.11983
			1.11534
			1.09487
			1.06663
			1.10269
			0.996401
			1.05011
			1.02255
			0.969407
			1.10918
			0.965619
			1.07279
			0.999108
			0.98582
			1.0388
			1.03557
			0.970883
			1.04136
			0.995015
			1.08197
			0.949462
			1.01152
			1.14693
			0.979939
			1.00085
			1.00465
			1.04508
			0.93676
			1.03258
			1.15842
			1.0909
			0.950212
			1.03899
			1.02415
			1.14226
			1.17961
			1.06628
			1.07828
			1.02676
			1.05402
			1.0564
			1.1424
			0.992646
			1.10068
			1.05009
			1.15266
			1.01208
			1.19437
			1.00344
			0.964189
			1.00067
			1.0461
			1.15321
			1.03375
			1.13473
			1.08061
			1.12688
			1.0977
			1.16309
			0.999271
			1.12393
			1.01159
			1.00684
			0.961148
			1.02643
			1.07844
			1.00018
			1.20764
			1.04953
			1.00161
			0.96377
			1.01801
			1.07337
			1.03222
			1.08225
			1.05293
			1.07096
			1.00261
			1.12992
			1.17876
			0.957049
			1.13844
			0.99079
			1.11621
			1.10359
			1.00379
			1.01298
			1.09876
			0.925279
			1.0484
			1.16777
			1.0699
			1.17923
			1.05234
			1.03657
			1.13681
			1.04792
			1.03264
			1.03463
			1.02311
			1.23232
			1.00676
			1.00465
			1.05086
			1.13409
			1.15492
			1.18073
			1.05202
			1.17947
			1.11568
			1.14998
			1.19434
			1.18127
			1.03185
			1.05562
			1.07301
			1.12327
			1.08072
			1.04727
			0.952508
			0.995095
			0.978878
			1.14287
			1.00243
			1.11538
			1.17538
			1.10827
			1.10464
			1.02689
			1.12545
			1.08841
			1.16011
			1.13884
			1.18808
			1.09507
			1.19531
			1.07453
			1.04356
			1.06476
			1.07997
			1.00253
			0.928284
			1.18652
			1.08567
			1.1241
			1.08554
			1.04587
			1.12113
			1.06845
			1.13844
			1.15013
			1.05913
			1.09172
			1.04933
			1.14088
			1.1746
			1.15766
			1.13439
			1.16994
			1.11945
			1.12452
			1.09788
			1.05633
			1.18607
			0.973356
			1.06072
			1.16142
			1.15843
			1.16011
			1.17905
			1.08574
			1.18571
			1.09002
			1.09385
			1.21905
			1.04446
			1.17384
			1.15731
			1.12912
			1.03014
			1.09821
			1.04149
			1.112
			1.08657
			1.12797
			1.1675
			1.0736
			0.974
			1.16149
			1.0124
			0.921538
			1.17579
			1.03367
			1.06506
			1.10385
			1.158
			1.01057
			1.15635
			1.06863
			1.13638
			1.07054
			1.10159
			1.08261
			1.03647
			1.08431
			1.05566
			1.09433
			1.07025
			1.12042
			1.05498
			1.10751
			1.21705
			1.1742
			1.25597
			1.18891
			1.13841
			1.09068
			1.11017
			1.04192
			1.20882
			1.17974
			1.16317
			1.07881
			1.16547
			1.17061
			1.03102
			1.02917
			1.07499
			1.11964
			1.01847
			1.13928
			1.05032
			1.20587
			1.04868
			1.16253
			1.11332
			1.1481
			1.14108
			1.05965
			1.13219
			1.09995
			0.981685
			1.25164
			1.01893
			1.13269
			1.05182
			1.18734
			1.08841
			1.08101
			1.05234
			1.07052
			1.15836
			1.11527
			1.21399
			1.243
			1.09505
			1.01574
			1.13049
			1.14847
			1.18508
			1.06315
			1.07218
			1.11146
			1.02858
			1.21919
			1.03987
			1.13587
			1.15765
			1.09649
			1.18255
			1.18729
			1.02742
			1.07892
			1.15945
			1.12775
			0.98773
			1.15463
			0.944188
			1.12982
			1.12035
			1.04473
			1.17446
			1.05619
			1.16908
			1.03528
			1.12897
			1.12997
			1.07429
			1.17157
			1.1466
			1.12233
			1.19044
			1.1128
			1.08355
			1.13145
			1.14337
			1.16806
			1.14131
			1.13198
			1.22166
			1.11569
			1.18351
			1.16277
			1.08614
			1.17518
			1.25362
			1.09346
			1.1636
			1.05768
			1.16014
			1.20496
			1.10102
			1.19196
			1.10626
			1.1134
			1.13903
			1.17573
			1.13801
			1.07857
			1.00599
			1.10572
			1.15705
			1.07177
			1.0785
			1.03867
			1.23392
			1.11381
			1.10135
			1.11827
			1.05638
			1.09908
			1.04457
			1.14673
			1.19554
			1.0513
			1.09199
			1.11425
			1.09759
			1.15623
			1.15634
			1.14471
			0.975767
			1.07221
			1.19903
			1.074
			1.13266
			1.20039
			1.10655
			1.09614
			1.06098
			1.13021
			1.03644
			1.16539
			1.13065
			1.05976
			1.1551
			1.06898
			1.21629
			1.0599
			1.09019
			1.21284
			1.24672
			1.10016
			1.16305
			1.09532
			1.14972
			1.00273
			1.10681
			1.13002
			1.11343
			1.18651
			0.976783
			1.07214
			1.17877
			0.988281
			1.17867
			0.994689
			1.14659
			1.04776
			1.14601
			1.09143
			1.10222
			1.1032
			1.25015
			1.09311
			1.09286
			1.12514
			1.12227
			1.16868
			1.10714
			1.0545
			0.996153
			1.18583
			1.17174
			1.12655
			1.17328
			1.3147
			1.05871
			1.15111
			1.35206
			1.28658
			1.19598
			1.22352
			1.12602
			1.17556
			1.13657
			1.05065
			1.08162
			1.13478
			1.09567
			1.08308
			1.13994
			1.09455
			1.11411
			1.07959
			1.33235
			1.15335
			1.23619
			1.17542
			1.15824
			1.1224
			1.00829
			1.17399
			1.09645
			1.04484
			1.26172
			1.19021
			1.16824
			1.22979
			1.06054
			1.34025
			1.07777
			1.20852
			1.20341
			1.25587
			1.20793
			1.29299
			1.29054
			1.15187
			1.15481
			1.1741
			1.29752
			1.12934
			1.24959
			1.25983
			1.06779
			1.25531
			1.17224
			1.1082
			1.25094
			1.19697
			1.06637
			1.10238
			1.30337
			1.09056
			1.1428
			1.12981
			1.23938
			1.07479
			1.15604
			1.21769
			1.17115
			1.28885
			1.07323
			1.23455
			1.14616
			1.1217
			1.18342
			1.27292
			1.09338
			1.18048
			1.07245
			1.19981
			1.16867
			1.20503
			1.11053
			1.22807
			1.09264
			1.16868
			1.17394
			1.20552
			1.21468
			1.1311
			1.18908
			1.19634
			1.14776
			1.17559
			1.08745
			1.25944
			1.15029
			1.23448
			1.2088
			1.12414
			1.18739
			1.19611
			1.09064
			1.06257
			1.04745
			1.28581
			1.17134
			1.12564
			1.19834
			1.16355
			1.16237
			1.14926
			1.17337
			1.2073
			1.12315
			1.12695
			1.22064
			1.0766
			1.21253
			1.1525
			1.15608
			1.27553
			1.26905
			1.17955
			1.10806
			1.18312
			1.21842
			1.26721
			1.13131
			1.1856
			1.14646
			1.17822
			1.13732
			1.28868
			1.26412
			1.23408
			1.19715
			1.15214
			1.15223
			1.36136
			1.06173
			1.05353
			1.25777
			1.24301
			1.12025
			1.21726
			1.20105
			1.19804
			1.19873
			1.16263
			1.10063
			1.11731
			1.12237
			1.13542
			1.24964
			1.24516
			1.16319
			1.16867
			1.13576
			1.26323
			1.19721
			1.1105
			1.34597
			1.28403
			1.17693
			1.10132
			1.17808
			1.16049
			1.15653
			1.18403
			1.15993
			1.23639
			1.16429
			1.06672
			1.19484
			1.22882
			1.11832
			1.34496
			1.22775
			1.20242
			1.33498
			1.21695
			1.19387
			1.13593
			1.26728
			1.20047
			1.30795
			1.18779
			1.16976
			1.12009
			1.23353
			1.17797
			1.18237
			1.11318
			1.19682
			1.19057
			1.20718
			1.23783
			1.16246
			1.31741
			1.24402
			1.34087
			1.15351
			1.23073
			1.19579
			1.14296
			1.23597
			1.36471
			1.18581
			1.2115
			1.08599
			1.22163
			1.1538
			1.19779
			1.16203
			1.32779
			1.20816
			1.3527
			1.20952
			1.21772
			1.24036
			1.22917
			1.27694
			1.14016
			1.23935
			1.19484
			1.2571
			1.19961
			1.34854
			1.21338
			1.19881
			1.1998
			1.23969
			1.37328
			1.25058
			1.14602
			1.26386
			1.23052
			1.17003
			1.34294
			1.18721
			1.18087
			1.17025
			1.18227
			1.22398
			1.15772
			1.249
			1.20398
			1.22643
			1.16749
			1.27591
			1.27312
			1.18254
			1.22059
			1.23384
			1.24413
			1.14278
			1.24599
			1.16662
			1.29468
			1.23591
			1.22853
			1.30993
			1.21153
			1.28919
			1.27606
			1.31435
			1.17735
			1.1728
			1.19642
			1.23505
			1.22963
			1.1407
			1.2773
			1.22167
			1.19708
			1.27648
			1.39343
			1.24083
			1.22497
			1.18886
			1.08672
			0.982927
			1.38579
			1.27548
			1.33259
			1.38152
			1.43939
			1.18905
			1.19135
			1.3337
			1.12333
			1.21721
			1.28322
			1.26672
			1.26457
			1.24378
			1.32113
			1.18813
			1.27779
			1.31016
			1.16486
			1.22497
			1.20646
			1.38839
			1.211
			1.29486
			1.35097
			1.35459
			1.21267
			1.22083
			1.26369
			1.15934
			1.2102
			1.12272
			1.28119
			1.12817
			1.31412
			1.351
			1.33864
			1.30448
			1.33701
			1.31104
			1.2993
			1.37571
			1.34471
			1.26494
			1.40489
			1.44342
			1.27987
			1.33424
			1.28493
			1.26826
			1.27286
			1.38844
			1.43216
			1.28461
			1.42377
			1.29795
			1.31185
			1.36748
			1.38481
			1.41708
			1.40609
			1.28375
			1.27111
			1.17696
			1.27044
			1.3775
			1.36657
			1.32188
			1.36135
			1.4141
			1.33517
			1.27899
			1.36361
			1.24624
			1.25546
			1.18079
			1.28982
			1.28338
			1.32184
			1.26946
			1.31499
			1.14161
			1.36611
			1.38431
			1.3418
			1.25334
			1.47327
			1.33454
			1.32206
			1.22933
			1.24576
			1.36095
			1.40739
			1.38419
			1.19902
			1.2552
			1.24331
			1.28454
			1.25231
			1.26215
			1.28103
			1.27027
			1.26094
			1.32258
			1.33333
			1.36899
			1.37239
			1.09818
			1.7126
			1.45988
			1.38348
			1.27849
			1.22812
			1.19248
			1.30203
			1.22824
			1.24965
			1.32982
			1.22552
			1.2671
			1.37705
			1.24901
			1.23368
			1.22422
			1.26177
			1.31814
			1.37789
			1.43772
			1.31468
			1.33131
			1.30427
			1.30217
			1.27822
			1.32184
			1.25996
			1.29639
			1.32139
			1.23239
			1.26608
			1.26936
			1.18636
			1.40175
			1.20659
			1.2242
			1.26628
			1.38315
			1.12245
			1.45434
			1.41008
			1.33002
			1.32357
			1.35985
			1.33112
			1.40535
			1.30781
			1.34997
			1.31249
			1.20953
			1.29175
			1.31022
			1.14585
			1.22599
			1.34778
			1.18639
			1.46943
			1.4062
			1.32443
			1.39467
			1.30716
			1.22703
			1.27162
			1.18488
			1.33042
			1.26111
			1.37995
			1.43439
			1.21298
			1.19006
			1.4072
			1.37532
			1.39926
			1.27093
			1.3345
			1.26926
			1.30188
			1.46235
			1.42089
			1.36136
			1.21844
			1.46434
			1.43849
			1.41979
			1.33333
			1.36795
			1.30288
			1.3196
			1.40768
			1.35277
			1.27098
			1.24478
			1.41218
			1.36641
			1.32536
			1.32028
			1.32349
			1.19649
			1.2813
			1.23803
			1.26923
			1.18328
			1.43689
			1.29191
			1.26624
			1.40535
			1.28164
			1.3036
			1.35788
			1.30812
			1.18971
			1.23654
			1.4212
			1.27055
			1.33479
			1.34128
			1.39641
			1.22739
			1.31454
			1.17923
			1.28074
			1.28614
			1.4414
			1.29387
			1.17951
			1.41089
			1.33621
			1.34931
			1.53615
			1.20362
			1.35825
			1.42734
			1.28123
			1.33355
			1.35272
			1.43174
			1.24252
			1.3964
			1.35006
			1.22648
			1.22996
			1.35972
			1.3475
			1.32969
			1.29075
			1.35115
			1.31696
			1.25884
			1.29262
			1.27327
			1.37749
			1.35089
			1.31149
			1.32338
			1.21802
			1.23887
			1.37891
			1.46728
			1.15188
			1.19095
			1.42199
			1.29928
			1.3703
			1.15071
			1.36388
			1.40832
			1.39008
			1.3401
			1.28718
			1.29468
			1.35176
			1.29544
			1.32071
			1.44964
			1.29354
			1.33916
			1.5427
			1.40989
			1.25381
			1.46393
			1.3118
			1.42578

## Sheet: Figure 7D
			eater-dsRed	dome-MESO-GFP
			25.961	26.589
			26.667	26.566
			27.814	27.271
			28.116	26.295
			31.574	25.457
			28.302	23.868
			27.767	25.395
			26.798	25.178
			26.698	26.124
			31.031	26.651
			28.256	26.279
			26.442	27.535
			30.713	28.891
			29.171	26.163
			32.364	28.504
			29.008	26.76
			28.419	27.271
			27.202	27.806
			27.837	26.922
			27.721	26.946
			25.845	27.814
			25.364	28.388
			27.155	25.178
			26.256	26.031
			28.636	27.078
			30.791	28.574
			28.295	27.171
			33.24	28.287
			31.806	26.837
			27.93	26.721
			30.636	25.76
			28.442	27.217
			29.132	26.008
			28.194	28.023
			30.326	27.054
			27.558	28.155
			28.426	26.798
			27.767	27.496
			29.279	26.496
			28.93	29.853
			27.86	25.558
			32.054	28.651
			26.581	27.884
			26.039	26.744
			27.581	26.209
			26.946	25.829
			29.023	26.364
			32.256	28.946
			25.481	27.93
			28.744	29.388
			32.364	29.124
			27.38	27.69
			28.295	29.085
			30.318	30.008
			34.496	28.155
			27.132	27.597
			30.07	27.178
			32.031	28.76
			28.667	29.217
			32.248	28.008
			28.465	26.124
			27.054	28.07
			28.946	28.752
			27.395	26.442
			29.419	28.24
			26.062	24.333
			25.713	26.597
			28.039	25.899
			28.271	27.039
			26.729	26.496
			31.132	26.264
			28.581	25.953
			28.55	24.93
			27.535	24.643
			28.341	26.426
			24.76	26.984
			28.961	25.992
			27.512	26.333
			29.69	26.884
			26.636	27.194
			29.194	26.667
			26.434	25.783
			27.287	26.078
			29.023	27.845
			30.705	27.605
			28.713	26.442
			29.752	28.767
			27.628	27.512
			31.101	27.969
			29.62	25.822
			31.07	27.814
			27.698	26.566
			29.938	26.357
			28.884	28.628
			30.767	28.969
			31.271	28.822
			31.194	25.806
			32.271	28.651
			29.24	28.907
			32.806	29.233
			32.566	28.202
			30.822	25.829
			31.767	29.008
			32.233	28.155
			35.481	27.31
			30.535	28.86
			30.806	27.752
			28.868	28.984
			29.07	27.698
			33.45	30.806
			34.566	27.907
			32.744	29.992
			26.822	27.395
			30.388	29.225
			30.891	27.953
			31.977	29.899
			28.667	25.349
			29.504	26.783
			29.116	25.682
			33.581	27.729
			29.527	26.605
			27.946	27.248
			29.38	29.481
			25.473	26.744
			26.504	26.287
			27.806	27.116
			25.767	27.38
			24.62	28.915
			31.636	28.287
			30.915	29.008
			33.922	30.442
			31.132	30.543
			29.318	30.62
			32.419	29.302
			30.38	28.248
			28.69	28.504
			29.023	29.698
			29.558	28.938
			31.527	28.264
			30.589	29.496
			31.682	26.767
			32.093	30.14
			28.287	28.55
			29.31	27.605
			29.364	29.907
			29.837	28.752
			33.767	30.132
			32.612	27.744
			30.581	29.605
			31.752	28.806
			33.271	28.488
			31.302	29.767
			31.395	27.473
			33.178	31.504
			32.171	27.884
			30.566	28.705
			31.403	28.775
			31.659	28.682
			28.628	27.829
			32.829	28.915
			31.364	30.271
			28.403	27.829
			32.093	27.395
			32.178	26.729
			29.651	28.736
			29.047	26.372
			30.984	29.225
			33.31	30.302
			30.705	29.271
			30.953	27.535
			30.86	29.295
			31.845	27.364
			32.085	27.698
			30.403	27.76
			28.915	26.636
			26.085	26.287
			28.922	26.264
			30.938	26.318
			33.132	28.891
			32.388	26.76
			28.574	26.372
			29.659	28.566
			30.605	28.209
			26.938	25.271
			33.667	28.132
			30.186	26.349
			28.845	28.845
			31.806	28.605
			29.767	30.147
			31.287	26.225
			30.667	28.008
			30.202	25.155
			27.969	25.38
			30.76	28.171
			29.194	26.953
			28.023	26.845
			30.395	26.543
			24.829	25.031
			28.705	25.581
			23.946	26.078
			26.279	25.023
			26.829	24.713
			27.326	24.519
			27.124	24.783
			27.736	24.705
			27.132	25.45
			25.822	23.721
			26.527	26.597
			29.581	23.527
			28.132	24.457
			26.628	22.636
			27.047	25.031
			27.062	22.829
			24.899	23.186
			24.791	24.271
			24.256	23.93
			24.961	25.558
			27	24.543
			25.907	23.597
			25.961	23.612
			25.442	24.171
			27.124	24.194
			25.333	26.388
			26.86	24.946
			29.814	26.574
			25.38	23.651
			25.372	24.155
			23.403	24.372
			26.124	23.132
			25.031	24.31
			25.946	24.519
			26.589	26.798
			26.302	25.45
			28.341	25.953
			24.434	22.667
			27.961	26.535
			25.899	24.984
			29.721	25.76
			25.426	25.853
			28.457	26.38
			27.938	27.721
			27.721	27.884
			29.124	27.984
			26.589	26.519
			29.837	25.442
			28.147	26.961
			27.287	25.628
			28	26.481
			31.791	28.566
			28.659	25.589
			27.209	25.574
			27.674	26.062
			29.837	26.628
			27.806	28.295
			27.132	25.217
			29.132	27.814
			26.07	26.721
			23.411	25.225
			27.194	26.163
			29.171	25.481
			28.783	26.264
			25.333	23.147
			28.729	25.388
			27.682	23.333
			26.674	25.574
			30.124	26.791
			26.651	23.426
			28.643	24.465
			27.783	24.744
			26.798	24.93
			28.039	26.023
			27.86	27.729
			29.256	24.729
			23.434	25.093
			27.93	27.721
			26.667	27.326
			27.527	25.403
			24.465	23.876
			25.76	27.806
			25.946	24.76
			25.961	23.946
			25.326	23.217
			25.791	24.659
			25.465	24.899
			28.426	26.891
			25.504	26.465
			25.837	23.992
			31.442	27.264
			26.93	25.349
			25.876	23.837
			27.729	24.899
			26.178	24.008
			28.628	28.171
			26.225	27.752
			25.837	25.814
			28.643	25.264
			28.186	28.279
			28.752	28.984
			27.14	24.667
			30.186	26.295
			29.581	24.039
			28.202	26.938
			27.388	26.822
			27.574	27.38
			30.775	26
			31.767	29.031
			26.341	26.783
			27.806	30.132
			29.868	29.186
			31.256	29.023
			32.457	30.194
			28.938	30.093
			33.07	28.302
			32.86	30.163
			33.047	32.14
			31.225	28.798
			36.078	30.457
			32.736	30.194
			32.589	29.256
			34.543	29.38
			34.217	29.473
			34.69	29.899
			33.194	30.806
			32.039	30.992
			31.233	26.984
			34.062	28.698
			32.69	30.178
			33.457	30.271
			33.977	26.806
			29.682	29.527
			32.791	27.116
			35.14	28.984
			31.186	27.496
			31.155	29.822
			35.744	28.473
			32.729	29.256
			32.178	27.209
			32.209	29.031
			32.62	28.217
			31.597	28.364
			30.752	28.419
			35.504	28.116
			31.705	28.729
			33.093	27.302
			31.217	27.597
			31.899	27.14
			33.093	26.837
			27.271	26.729
			29.984	28.372
			29.023	25.744
			27.388	25.109
			29.07	23.93
			28.155	26.085
			26.233	24.713
			29.612	23.202
			27.457	24.07
			28.535	24.209
			25.922	24.279
			27.147	26.302
			29.969	26.442
			31.062	27.628
			30.775	25.899
			31.225	26.14
			29.481	27.411
			30.109	26.217
			29.977	26.915
			33.667	26.543
			33.403	26.287
			29.581	26.016
			31.612	25.961
			32.822	24.434
			30.109	24.558
			31.233	23.178
			32.457	27.194
			32.55	26
			35.225	25.411
			32.217	26.248
			30.953	26.202
			33.791	27.589
			34.171	27.814
			33.054	27.481
			32.791	28.364
			34.597	29.163
			31.822	28.016
			33.628	28.287
			30.465	28.915
			32.922	28.721
			34.543	28.388
			31.488	27.186
			35.38	29.729
			33.643	28.008
			33.302	28.977
			34.868	28.504
			36.186	28.062
			31.984	25.473
			36.682	26.581
			32.217	26.977
			34.698	29.271
			36.062	28.767
			33.643	27.085
			36.178	27.519
			34.194	26.938
			35.814	26.395
			33.744	27.543
			35.186	27.876
			33.287	26.953
			30.326	27.434
			37.481	28.395
			33.915	27.008
			36.543	27.171
			34.279	28.798
			31.969	28.264
			37.318	27.558
			33.426	28.016
			33.814	25.899
			32.504	26.76
			33.829	23.984
			31.333	27.357
			34.357	25.674
			33.426	25.519
			34.434	26.566
			32.705	25.535
			38.752	26.364
			34.527	27.589
			33.643	26.558
			34.023	28.86
			38.109	27.736
			35.822	27.581
			36.395	26.302
			33.488	26.922
			34.62	26.682
			38.24	26.736
			35.225	26.674
			36.729	27.721
			35.589	27.465
			34.806	27.837
			36.884	26.566
			34.729	27.992
			37.922	26.24
			37.302	25.744
			35.829	27.76
			35.178	27.558
			35.287	27.791
			37.008	27.364
			38.504	27.171
			40.806	28.233
			35.69	27.713
			34.845	27.279
			33.318	26.341
			36.884	28.891
			39.636	28.078
			34.512	25.76
			36.713	27.07
			37.915	27.992
			37.876	27.24
			37.031	28.519
			36.628	27.698
			36.171	26.822
			35.442	28.457
			34.519	28.93
			38.922	27.248
			39.225	27.24
			37.45	28.473
			34.659	28.86
			37.729	27.054
			36.829	27.062
			33.442	24.845
			38.915	26.659
			38.589	26.705
			31.535	24.961
			37.016	27.891
			36.527	24.085
			38.023	26.054
			38.868	27.992
			38.938	27.829
			40.14	26.062
			37.829	27.07
			36.147	27.744
			38.047	27.085
			38.713	24.93
			38.155	27.961
			36.915	26.279
			37.969	25.791
			34.171	28.628
			35.953	25.473
			40.597	28.233
			35.589	25.775
			34.512	28.14
			36.512	25.868
			38.86	26.93
			38.829	26.86
			36.349	26.961
			37.674	27.38
			35.403	25.659
			41.202	25.07
			38.031	26.535
			35.326	26.605
			35.643	26.054
			37.411	26.512
			38.504	27.984
			34.992	27.915
			33.364	24.783
			40.961	27.388
			36.101	25.736
			42.915	26.636
			37.643	26.016
			37.581	26.93
			37.372	24.961
			34.543	26.605
			35.806	23.109
			35.333	25.465
			36.659	25.279
			37.333	24.922
			36.736	23.659
			34.845	25.194
			35.829	23.225
			33.721	25.333
			35.984	24.643
			33.612	24.612
			40.481	25.411
			37.969	26.155
			37.814	24.682
			33.225	23.481
			34.279	24.481
			38.047	27.38
			36.039	25.465
			34.589	23.519
			34.194	24.38
			36.333	25.62
			35.202	25.992
			36.667	25.86
			32.938	23.287
			35.318	24.829
			36.442	25.085
			36.667	25.76
			36.403	25.76
			35.93	24.946
			38.527	24.806
			35.054	24.651
			39.783	26.008
			41.977	26.876
			36.155	26.946
			35.109	25.171
			38.256	25.845
			40	26.403
			36.946	25.326
			39.829	25.899
			36.109	23.357
			36.38	24.907
			38.814	26.55
			37.496	25.357
			34.783	23.039
			37.186	25.186
			34.085	25.217
			38.403	25.124
			37.682	26.597
			35.287	26.202
			36.55	25.946
			39.814	26.705
			37.907	27.023
			39.915	28.698
			36.984	25.45
			39.814	26.078
			33.86	23.922
			36.884	24.403
			37.07	25.69
			39.574	26.667
			39.535	26.736
			40.915	26.876
			43.574	26.333
			39.907	28.496
			39.45	25.977
			39.124	27.132
			36.628	26.186
			37.899	24.891
			37.721	27.946
			40.116	25.845
			37.698	24.023
			37.209	25.736
			35.233	26.132
			38.558	27.031
			36.085	24.705
			39.209	27.411
			35.705	27.884
			35.698	26.016
			36.473	25.178
			38.659	26.744
			36.279	26.426
			36.217	24.713
			40.698	27.496
			40.729	26.519
			39.977	26.279
			36.395	22.984
			38.295	27.372
			39.667	26.946
			39.558	27.225
			37.76	26.14
			40.295	26.062
			37.612	25.31
			38.814	26.868
			37.829	25.853
			36.55	24.535
			38.961	26.271
			39.922	25.628
			35.752	26.628
			39.31	24.023
			40.775	28.45
			40.426	25.682
			37.031	25.969
			38.248	27.62
			41.419	26.388
			38.891	27.798
			38.558	28.519
			39.023	27.403
			39.504	26.597
			37.543	26.891
			40.116	28.171
			40.085	27.938
			38.326	26.147
			36.705	24.527
			39.116	26.38
			37.248	26.171
			44.969	25.403
			37.558	27.713
			38.806	26.147
			38.186	26.403
			36.659	25.093
			42.062	25.566
			35.225	26.217
			39.876	25.186
			39.736	26.698
			37.798	25.62
			35.829	26.411
			37.574	25.271
			37.38	27.279
			36.682	25.14
			37.519	25.132
			39.907	26.357
			36.388	26.589
			37.806	25.86
			36.287	26.729
			37.775	22.853
			36.659	25.202
			34.395	23.814
			40.798	25.891
			37.481	26.24
			38.915	26.256
			37.372	25.147
			38.597	27.752
			38.349	27.163
			38.062	25.891
			39.109	27.992
			41.891	25.171
			37.612	23.961
			39.302	24.636
			32.636	26.302
			37.202	25.295
			39.341	25.085
			36.047	24.961
			36.946	26.581
			35.163	27.047
			39.93	27.667
			36.922	24.977
			41.938	28.054
			41.527	27.124
			39.736	25.853
			40.891	27.101
			36.039	23.442
			40.357	26.829
			38.558	26.388
			40.132	25.248
			38.527	25.101
			40.977	24.891
			38.597	25.287
			40.953	25.791
			40.023	27.333
			38.628	27.171
			35.318	26.047
			37.822	24.907
			39.24	26.822
			37.488	26.109
			38.233	27.612
			44.798	26.558
			37.202	27.535
			39.116	26.155
			39.791	26.295
			36.194	27.171
			41.698	26.341
			39.38	26.388
			36.318	26.798
			35.481	27.116
			37.171	23.085
			40.705	27.225
			36.434	28.442
			42.721	26.884
			42.612	28.519
			42.078	27.116
			44.605	28.233
			41.186	29.822
			43.093	27.837
			42.93	27.504
			41.209	29.171
			41.55	27.535
			38.783	25.891
			37.806	26.473
			39.116	26.977
			42.837	28.093
			41.023	29.55
			40.14	28.93
			39.38	26.791
			36.364	28.023
			39.116	26.767
			41.31	27.279
			37.419	27.868
			40.016	30.349
			42.442	29.589
			40.969	28.868
			45.07	27.085
			39.783	27.961
			37.457	27.302
			41.69	27.729
			42	26.938
			39.287	24.806
			37.163	27.589
			38.884	27.38
			40.698	25.14
			37.349	26.822
			38.581	27.333
			38.333	23.868
			38.783	26.543
			36.55	27.202
			40.674	26.984
			37.984	25.109
			37.581	24.705
			38.481	27.318
			38.713	26.543
			39.721	27.845
			40.279	26.953
			42.86	28.419
			39.403	25.907
			40.558	27.442
			42.628	27.597
			38.287	29.581
			39.643	28.333
			39.597	28.713
			38.922	28.674
			43.822	28.016
			41.636	27.659
			40.798	27.721
			40.899	26.481
			43.767	26.45
			43.287	28.837
			43.628	27.178
			40.085	27.519
			40.07	27.736
			42.977	29.109
			41.14	27.953
			42.264	29.016
			40.426	26.55
			42.14	26.868
			37.938	28.806
			41.628	28.504
			36.791	26.473
			43.085	29.24
			38.248	27.729
			40.984	28.31
			39.543	29.078
			36.581	25.953
			40.853	26.674
			42.488	26.519
			38.434	28.403
			42.558	28.031
			38.76	27.364
			40.744	26.767
			41.744	27.372
			37.969	27.682
			37.605	27.24
			41.426	27.109
			43.07	28.264
			40.047	28.426
			41.442	28.116
			39.45	27.69
			42.465	28.628
			38.721	25.837
			39.744	27.295
			39.442	26.977
			43.845	26.512
			42.992	25.395
			41.279	28.202
			40.984	26.372
			39.891	28.605
			41.039	27.357
			39.426	26.922
			39.504	26.574
			39.209	26.465
			39.899	27.016
			37.403	24.868
			41.24	26.884
			38.69	25.899
			42.426	24.178
			39.333	26.814
			44.132	27.008
			42.822	27.465
			43.287	27.295
			42.349	28.38
			43.775	27.69
			45.031	27.442
			44.016	28.054
			42.395	28.705
			42.364	26.729
			42.775	29.047
			41.961	27.659
			41.969	28.457
			42.752	27.814
			42.171	27.124
			42.729	27.124
			44.868	28.38
			45.248	28.031
			43.333	26.698
			43.124	28.202
			39.876	29.318
			41.109	28.023
			44.752	28.326
			43.76	27.946
			41.566	29.566
			42.961	27.217
			41.225	26.984
			42.349	25.543
			44.465	27.922
			42.876	27.078
			41.837	26.628
			39.899	25.264
			44.891	26.287
			38.419	26.209
			42.55	25.357
			41.659	27.31
			41.434	26.744
			42.628	25.442
			42.264	27.597
			46.233	27.853
			43.775	27.891
			42.698	26.628
			40.264	26.682
			42.977	27.178
			44.504	27.31
			39.876	26.76
			41.194	27.07
			41.667	28.814
			41.326	26.512
			40.729	27.977
			39.357	27.093
			41.938	27.667
			40.628	26.233
			41.713	25.403
			39.651	25.884
			41.349	27.667
			39.806	24
			37.372	25.442
			40.845	24.163
			41.186	26.442
			38.372	26.457
			36.271	26.713
			39.868	27.45
			38.225	25.69
			41.721	28.822
			41.093	27.504
			41.163	27.512
			39.078	27.341
			38.915	26.992
			40.589	28.326
			44.186	26.411
			41.845	28.69
			42.147	28.977
			41.388	24.457
			43.589	28.008
			42.55	26.605
			44.791	28.023
			44.38	27.101
			43.085	27.535
			42.388	26.884
			40.535	27.287
			38.054	26.574
			37.667	25.884
			40.915	25.907
			43.008	25.519
			36.721	24.752
			38.333	26.899
			40.868	27.047
			37.543	25.876
			38.55	27.806
			41.543	26.814
			40.109	26.101
			43.101	27.899
			40.178	26.612
			41.566	26.876
			39.55	26.116
			39.326	27.395
			39.411	25.713
			36.054	26.659
			40.512	24.953
			41.093	27.326
			40.705	26.806
			38.876	25.372
			45.589	26.341
			43.163	25.651
			38.566	26.853
			43.14	24.915
			41.039	27.38
			40.891	26.388
			37.752	22.55
			36.302	24.961
			38.884	23.884
			37.287	24.116
			34.907	25.814
			37.961	25.062
			39.55	24.682
			37.163	25.155
			38.969	25.767
			39.837	25.426
			36.349	24.612
			37.023	23.736
			38.822	25.442
			39.806	25.233
			42.527	24.132
			40.574	25.085
			41.202	26.643
			45.605	26.721
			38.178	26.271
			39.202	25.38
			43.031	25.814
			40.651	23.775
			36.953	22.953
			39.845	22.093
			38.597	23.411
			41.969	24.225
			41.775	25.775
			41.31	24.225
			39.209	24.488
			39.969	23.326
			41.078	24.016
			39.589	24.713
			36.194	25.465
			44.186	25.457
			42.287	24.388
			40.76	25.953
			42.822	24.101
			42.341	24.837
			39.248	26.62
			43.209	26.488
			39.465	27.062
			39.907	27.868
			38.07	24.961
			36.977	24.589
			40.791	25.62
			40.698	25.806
			40.287	24.597
			44.403	27.55
			45.101	26.031
			39.186	24.574
			41.984	24.093
			43.388	25.752
			41.853	26.736
			41.496	24.899
			41.558	23.791
			40.651	26.76
			41.806	24.535
			40.163	23.899
			42.163	24.442
			36.171	23.395
			35.341	23.016
			40.349	26.287
			37.07	24.008
			38.605	23.364
			36.752	24.047
			39.992	25.147
			38.643	24.45
			40.589	23.589
			35.45	23.837
			39.628	25.504
			38.279	23.318
			38.287	21.946
			35.302	23.488
			34	20.775
			39.876	23.085
			38.372	21.969
			36.457	21.938
			35.767	21.651
			39	22.496
			37.062	22.054
			38.031	22.946
			38.225	24.016
			42.101	25.016
			41.093	25.698
			39.202	23.628
			39.744	25.101
			39.047	23.054
			39.907	26.062
			38.736	24.31
			40.636	25.233
			38.512	23.907
			40.395	23.512
			40.225	24.535
			36.411	23.147
			40.171	23.922
			39.984	23.884
			38.442	25.054
			43.186	24.713
			39.395	23.659
			36.302	23.155
			38.008	24.434
			42.349	24.62
			37.806	22.535
			41.016	24.287
			37.729	24.163
			37.256	24.364
			40.884	26.318
			38.209	25.039
			40.783	25.434
			37.209	25.744
			39.736	24.977
			40.558	23.372
			36.791	24.116
			39.791	23.496
			37.953	23.403
			36.488	23.853
			40.488	22.953
			39.589	24.047
			40.085	24.403
			39.403	24.868
			41.481	23.729
			38.233	23.155
			42.496	22.651
			38.682	22.124
			39.775	24.38
			37.752	24.388
			37.651	23.124
			36.202	24.767
			38.388	23.287
			37.868	25.264
			37.922	25.899
			38.109	25.829
			38.891	24.558
			39.341	25.171
			40.101	24.24
			41.419	23.054
			36.287	23.388
			39.403	24.798
			38.302	22.791
			41.822	26.039
			38.039	23.124
			38.899	24.426
			36.093	25.016
			38.132	22.829
			38.977	24.031
			41.612	24.016
			40.124	25.256
			40.806	25.744
			35.659	24.054
			40.31	24.388
			37.628	22.752
			41.55	24.202
			40.589	25.209
			42.481	26.225
			39.248	25.868
			40.969	25.667
			42.008	25.279
			44.853	24.984
			40.744	23.969
			39.961	23.55
			40.357	24.907
			38.907	25.171
			40.574	25.07
			43.504	24.62
			40.512	26.101
			40.388	24.744
			38.946	25.31
			42.636	24.806
			41.938	24.233
			38.101	24.124
			37.659	22.969
			36.039	21.891
			39.24	23.69
			36.271	22.822
			37.589	22.031
			40.155	22.054
			41.628	25.132
			42.581	25.783
			40.899	23.318
			38.109	26.194
			41.295	25.62
			38.039	24.248
			41.078	23.388
			40.984	25.341
			41.69	25.736
			39.403	24.357
			43.589	26.612
			45.481	27.465
			40.636	25.605
			42.473	24.876
			43.62	24.047
			42.395	25.078
			40.581	22.535
			44.039	26.519
			44.543	25.783
			41.969	26.233
			41.698	26.442
			42.574	26.364
			41.403	25.155
			41.876	25.581
			40.062	25.411
			42.287	25.209
			38.403	25.884
			41.961	23.535
			42.698	26.752
			44.031	25.736
			40.674	24.023
			43.543	25.155
			41.124	23.783
			41.744	25.341
			44.535	25.318
			43.814	25
			42.767	24.744
			39.674	23.744
			43.38	25.395
			43.194	26.868
			40.775	25.845
			42.209	25.488
			43.31	25.93
			44.465	26.814
			41.55	26.922
			43.349	27.116
			45.388	24.922
			42.481	25.984
			43.899	26.078
			38.868	26.031
			42.845	26.589
			41.016	25.837
			40.829	25.403
			40.302	28.326
			43.434	25.729
			43.023	25.388
			42.101	26.264
			40.791	26.403
			42.178	26.372
			41.388	27.442
			43.38	25.496
			42.264	25.194
			46.698	26.039
			43.876	25.884
			41.907	26.86
			42.341	26.481
			40.581	25.372
			42.163	24.302
			40.085	22.062
			44.605	24.922
			42.465	24.132
			41.775	24.349
			40.457	25.109
			42.287	24.837
			39.039	23.798
			37.047	23.233
			38.837	23.504
			36.69	22.899
			43.209	22.279
			40.388	23.302
			41.566	21.085
			42.078	24.132
			37.829	24.659
			39.426	24.465
			43.659	23.581
			40.279	24.984
			40.597	24.124
			39.915	24.729
			39.38	23.147
			41.116	23.907
			40.884	23.93
			36.659	24.101
			42.109	25.256
			40	23.465
			40.589	24.736
			47.101	25.783
			42.752	26.55
			43.496	24.116
			40.465	23.806
			41.287	23.519
			40.581	26.55
			41.853	25.054
			43.326	23.829
			37.341	23.829
			41.55	22.729
			39.318	22.597
			36.248	22.86
			39.86	20.953
			38.605	23.961
			39.543	25.016
			39.86	22.667
			40.837	22.984
			38.264	23.062
			41.318	22.264
			38.977	23.946
			41.884	24.434
			35.806	24.504
			39.023	22.899
			39.659	23.775
			42.767	24.574
			40.698	23.116
			36.884	23.233
			39.884	23.147
			35.713	22.457
			40.264	24.388
			38.24	21.279
			37.349	23.256
			39.806	22.667
			37.426	21.519
			37.264	23.186
			38.899	23.225
			36.977	22.116
			38.302	22.953
			39.899	24.132
			37.434	22.636
			40.752	21.86
			40.93	23.364
			38.457	23.287
			39.395	23.798
			40.233	24.589
			46.946	26.426
			38.047	23.388
			44.457	24.605
			43.248	24.798
			41.442	23.341
			40.643	25.078
			41.705	24.814
			42.388	23.023
			39.961	24
			38.008	21.977
			41.597	21.868
			40.116	24.186
			41.876	22.008
			41.078	21.907
			36.698	21.884
			38.054	23.612
			38.961	22.922
			38.341	23.256
			43.14	21.775
			36.45	21.14
			38.008	23.674
			37.953	22.721
			40.357	22.264
			39.209	21.837
			36.946	22.248
			38.698	22.667
			40.155	21.535
			38.713	22.45
			38.86	21.31
			37.225	20.566
			41.705	23.209
			38.419	21.93
			37.581	23.054
			38.899	21.543
			35.961	22.24
			36.752	22.713
			37.674	23.023
			38.279	20.403
			34.612	20.729
			36.248	20.295
			38.496	21.891
			36.147	21.302
			37.721	18.992
			38.837	21.178
			34.853	22.178
			35.465	21.233
			37.202	21.225
			39.69	21.194
			34.791	20.326
			36.643	20.698
			32.698	19.333
			38.45	20.853
			35.868	21.837
			36.667	20.775
			37.667	18.574
			38.69	21.907
			38.287	20.411
			35.326	22.124
			38.93	20.713
			36.721	21.085
			36.721	21.651
			35.38	22.233
			37.946	20.953
			36.86	21.209
			42.209	22.667
			38.783	20.69
			39.07	21.24
			34.589	20.31
			39.977	20.853
			40.736	21.124
			38.783	21.674
			37.992	21.915
			36.186	21.271
			38.86	22.814
			41.372	22.76
			35.504	20.736
			40.217	21.907
			38.868	20.279
			41.426	20.791
			41.062	21.109
			42.682	21.822
			39.07	22.736
			40.419	21.798
			39.798	22.434
			40.783	22.806
			36.636	21.698
			35.814	20.434
			37.109	21.643
			36.651	20.814
			33.357	20.14
			36.791	22.798
			39.318	22.791
			38.14	20.899
			37.876	19.977
			39.295	22.016
			36.364	19.93
			36.574	22.202
			36.946	20.659
			37.194	21.209
			37.512	21.38
			39.078	19.605
			34.698	18.713
			34.535	21.891
			37	20.318
			36.047	20.388
			40.016	20.333
			39.124	21.279
			35	20.155
			37.853	22.674
			36.93	20.326
			36.209	22.202
			35.806	20.969
			36.884	22.388
			37.744	20.922
			39.659	20.829
			36.899	19.643
			37.938	21.721
			36.341	21.031
			31.767	19.008
			35.698	19.07
			43.016	21.643
			37.008	20.581
			37.969	21.147
			37.256	22.915
			39.372	20.411
			37.194	21.419
			37.519	22.341
			38.07	20.659
			34.295	19.558
			34.271	20.31
			36.907	20.643
			39.023	19.729
			35.465	21.566
			37.217	18.318
			37.946	20.101
			41.132	21.915
			37.791	19.721
			37.798	19.209
			38.388	20.186
			37.248	19.512
			38	17.992
			40.085	20.643
			38.519	22.326
			42.248	23.233
			39.109	21.721
			42.109	21.775
			38.349	21.109
			41.209	21.674
			35.504	20.264
			37.209	22.953
			39.279	20.868
			35.124	21.93
			36.543	21.535
			37.388	21.403
			38.674	21.597
			39.186	21.969
			35.457	19.946
			40.628	20.434
			35.907	20.86
			42.946	21.884
			40.209	22.527
			38.023	22.124
			39.171	20.589
			39.574	22.814
			41.442	21.636
			40.783	23.155
			41.76	23.116
			38.45	23.403
			38.202	23.566
			40.326	21.69
			39.38	20.341
			34.752	21.271
			38.132	22.07
			39.008	24.116
			38.457	22.558
			41.186	22.566
			40.318	22.744
			37.791	23.287
			39.039	20.628
			44.527	24.326
			41.713	24.589
			45.853	24.341
			42.705	23.364
			43.349	23.636
			38.426	23.566
			40.783	22.116
			41.636	22.713
			41.814	23.178
			40.76	23.326
			40.326	21.419
			38.946	21.961
			38.016	23.233
			39.38	22.713
			41.884	24.031
			40.86	24.124
			39.349	22.372
			43.922	22.372
			43.783	23.698
			46.093	23.132
			45.829	24.853
			44.612	25.38
			43.116	23.589
			44.07	24.488
			42.946	25.488
			45.488	24.403
			43.248	21.194
			42.202	23.845
			46.884	25.039
			38.31	22
			42.682	23.178
			41.86	24.426
			41.698	22.721
			41.907	21.364
			40.171	22.124
			38.946	22.674
			40.31	20.357
			39.791	23.364
			36.736	22.86
			41.426	21.713
			39.953	19.721
			41.062	20.752
			43.116	22.302
			40.078	22.667
			41.333	21.76
			40.868	23.349
			42.147	23.953
			43	22.729
			41.729	21.481
			44.953	23.465
			43.628	23.349
			43.287	23.318
			44.163	22.535
			40.295	23.217
			46.202	24.256
			40.264	22.403
			41.295	23.031
			41.798	21.016
			40.566	22.326
			39.984	22.163
			36.264	20.357
			37.116	21.543
			41.899	22.318
			40.202	21.527
			37.434	20.016
			37.403	19.636
			40.24	21.45
			38.543	20.628
			41.837	20.605
			39.845	23.271
			38.411	22.512
			39.434	19.884
			39.442	21.806
			39.07	19.667
			37.907	21.767
			40.713	22.07
			43.93	23.279
			40.039	23.155
			37.698	22.202
			37	22.38
			36	21.775
			39.566	21.008
			39.884	21.899
			37.488	20.372
			42.566	21.24
			37.977	23.287
			41.233	20.55
			38.798	20.248
			36.527	22.008
			39.225	20.527
			41.736	21.209
			37.364	21.008
			41.047	21.783
			41.07	21.574
			39.729	22.349
			39.341	23.233
			40.512	22.116
			39.062	21.395
			37.705	20.457
			41.186	22.101
			39.488	20.085
			37.023	20.566
			39.155	22.116
			36.698	21.488
			34.38	19.977
			42.054	20.659
			39.178	21.031
			37.318	17.93
			38.543	19.899
			38.147	22.434
			38.643	21.349
			36.132	20.31
			40.171	19.682
			37.574	20.054
			36.488	20.899
			39.116	21.891
			39.899	22.101
			38.922	19.713
			35.434	20.419
			41.891	21.264
			38.705	22.093
			39.783	20.93
			37.543	20.566
			40.853	20.403
			37.488	20.062
			36.519	19.442
			37.07	21
			39.264	20.899
			34.496	18.783
			36.628	20.984
			39.403	19.643
			35.744	19.69
			37.31	21.543
			37.581	19.984
			38.527	21.977
			38.124	22.589
			38.946	21.938
			37.752	20.589
			37.093	20.814
			41.612	21.116
			40.078	21.512
			39.744	21.744
			36.992	20.24
			36.674	19.116
			36.884	20.488
			39.256	20.558
			39.209	22.721
			37.442	21.349
			36.085	19.636
			37.318	21.969
			38.605	21.922
			42.085	22.535
			39.558	20.969
			40.434	21.38
			39.426	21.302
			36.318	21.643
			36.814	20.876
			36.55	19.868
			36.07	18.915
			38.512	21.946
			37.589	18.589
			37.318	19.628
			40.202	21.109
			36.884	19.271
			38.527	20.62
			41.736	19.225
			33.705	18.488
			33.767	17.318
			40.178	20.31
			33.465	18.798
			31.636	20.279
			37.093	19.574
			36.016	18.698
			41.496	19.442
			36.543	20.194
			34.845	18.69
			35.705	20.357
			35.829	18.93
			34.806	18.488
			35.868	20.209
			34.853	19.977
			37.264	18.209
			35.496	17.938
			33.209	18.946
			38.287	18.767
			38.147	19.651
			39.775	18.457
			33.69	18.357
			35.124	19.054
			34.55	19.302
			34.256	17.86
			30.698	16.806
			35.674	19.736
			32.651	19.426
			35.116	16
			33.349	18.14
			30.388	15.86
			36.403	16.667
			29.55	16.705
			33.256	19.395
			34.155	17.829
			30.256	17.519
			32.279	17.744
			34.907	18.078
			35.822	18.341
			34.217	17.411
			33.357	17.426
			33.116	18.496
			36.07	19.705
			34.705	18.682
			37.713	18.31
			36.667	18.612
			37.07	19.767
			36.031	19.302
			35.318	19.062
			34.271	17.798
			31.403	17.202
			34.31	18.155
			34.597	18.752
			35.039	18.829
			34.078	18.016
			33.031	17.946
			35.271	18.55
			34.264	18.124
			33.45	17.031
			31.853	17.411
			34	17.605
			34.822	18.69
			34.016	18.279
			33.225	16.86
			35.132	17.132
			38.566	17.798
			35.078	16.659
			32.233	18.062
			33.705	16.938
			33.101	17.884
			33.822	19.047
			39.76	17.209
			32.597	17.605
			37.465	16.682
			38.364	19.891
			36.14	19.054
			35.457	19.163
			34.256	19.039
			38.527	18.504
			35.713	18.302
			36.55	17.713
			31.225	16.783
			34.178	18.217
			37.636	17.922
			42.132	19.698
			34.434	16.961
			34.403	17.829
			34.07	15.271
			33.837	19.093
			36.14	19.845
			35.109	18.442
			37.969	18.783
			38.395	17.496
			36.736	17.395
			36.124	17.891
			35.589	17.457
			35.488	16.93

[truncated: 9 more sheets: Figure 7D., Figure 7D.., Figure 7E, Figure 7F, Figure 7G, Figure 7H, Figure 7J, Figure 7L, Figure 7N]
